# Supplementary material for: Hsa-miR-183-5p Modulates Cell Adhesion by Repression of ITGB1 Expression in Prostate Cancer
Source: Noncoding RNA. 2022 Jan 18;8(1):11. doi: 10.3390/ncrna8010011 (PMC8875343; doi:10.3390/ncrna8010011)
Supplement: Supplementary file 1 [file ncrna-08-00011-s001.zip › Oliveira-Rizzo et al ncRNA Supplementary Tables_CO.xlsx]

## Sheet: Supplementary Table S1
DU145_Mimic	DU145_Inhibitor	LNCaP_Mimic	LNCaP_Inhibitor	SELECTED TRANSCRIPTS		DEGs of transient transfectants 24hs (FC 1.25 in at least to conditions)_Affymetrix Microarrays
ABCB6	SEPT7	AGO2	AGO2	AGO2
ABCC3	SEPT10	AGO4	SEPT2	SEPT7
ABCC9	ABHD10	SEPT4	SEPT8	SEPT8
ABCF2	ABHD11	SEPT7	SEPT10	SEPT10
ABHD11	ACP1	SEPT8	ABCC10	ABCC4
ABHD17B	ACSM2B	AAMP	ABCC4	ABCC9
ABHD2	ACTR2	AARS	ABCC9	ABCF2
ABLIM1	ACYP2	ABCA2	ABCF2	ABHD11
ACAP2	ADAM10	ABCC1	ABHD11	ABHD14B
ACBD3	ADH5	ABCC4	ABHD14B	ABHD2
ACBD5	ADK	ABCF2	ABL2	ABL2
ACIN1	ADPGK	ABCF3	ABR	ACIN1
ACOT7	AFAP1L1	ABHD12	ACKR3	ACLY
ACTB	AIDA	ABHD14B	ACLY	ACSM2B
ACTR2	AIMP1	ABHD2	ACSL1	ACTB
ADAM10	AKAP10	ABHD8	ACSL4	ACTN1
ADAM15	AKIRIN1	ABL2	ACSM2B	ACTR2
ADAM9	ALDH7A1	ACAD8	ACSM3	ACTR3B
ADARB2-AS1	ALG10	ACAP1	ACSS3	ACYP2
ADCY1	ALG13	ACAP3	ACTB	ADAM10
ADD3	ANAPC10	ACER3	ACTN1	ADAM22
ADGRF5	ANAPC16	ACHE	ACTR2	ADAM9
ADGRG6	ANKRD28	ACIN1	ACTR3B	ADCY1
ADH4	ANKRD29	ACLY	ADAM10	ADK
ADK	ANKUB1	ACO2	ADAM22	ADPGK
ADORA1	ANLN	ACOX1	ADAM9	AGAP4
ADPGK	ANP32E	ACP2	ADAMTS17	AGAP9
AEBP2	ANXA2	ACSM2B	ADCY1	AGFG1
AGAP4	AP1AR	ACSS2	ADPGK	AGPAT3
AGAP9	AP1S1	ACTB	ADRB2	AGTRAP
AGBL3	APLN	ACTL8	ADRBK2	AIMP1
AGTRAP	APOO	ACTN1	ADSSL1	AIP
AHNAK2	APPL1	ACTN4	AFF4	AK2
AIMP1	ARGLU1	ACTR1A	AGAP4	AKAP1
AIMP2	ARHGAP29	ACTR3B	AGFG1	AKAP13
AIP	ARHGAP5	ACYP2	AGPAT3	AKAP3
AK2	ARIH2OS	ADAD2	AGPS	AKAP8L
AKAP1	ARL1	ADAM22	AHI1	AKIRIN1
AKAP11	ARL6	ADAM9	AIFM1	AKR7A2
AKAP13	ARMC10	ADAMTS13	AK2	AKT1
AKAP8L	ARNT	ADCK3	AK4	AKT2
AKIRIN1	ASAH1	ADCY1	AKAP1	ALDH3A2
AKR1E2	ASAH2B	ADD1	AKAP13	ALG10
AKT1S1	ASF1A	ADGRL1	AKAP3	ALG13
AKT2	ASPM	ADIPOR1	AKAP8L	ALKBH5
ALAD	ATAD2	ADO	AKIRIN1	ANAPC10
ALDH1A3	ATAT1	ADPGK	AKR7A2	ANAPC5
ALDH3A2	ATF1	ADRM1	AKT1	ANKIB1
ALG10	ATG10	AES	ALCAM	ANKRD10-IT1
ALG13	ATP11A	AFG3L1P	ALDH18A1	ANKRD11
ANAPC10	ATP5S	AGAP4	ALDH3A2	ANKRD13D
ANAPC5	ATP6AP2	AGAP9	ALDH6A1	ANKRD20A5P
ANKIB1	ATP6V0E1	AGER	ALG10	ANKRD28
ANKRD10-IT1	B3GALNT1	AGFG1	ALKBH5	ANKRD29
ANKRD11	B9D1	AGPAT1	ALS2	ANKRD36B
ANKRD13A	BAG2	AGPAT3	AMOTL2	ANKS6
ANKRD13D	BBIP1	AGRN	ANAPC5	ANP32A
ANKRD17	BBS7	AGTRAP	ANK3	ANXA6
ANKRD29	BCAS4	AGXT	ANKIB1	AP1M2
ANKRD36	BCOR	AHCYL1	ANKRD10-IT1	AP1S1
ANKRD50	BICD1	AHSA2	ANKRD11	AP2M1
ANO8	BID	AIP	ANKRD20A5P	AP2S1
ANP32A	BIRC5	AIPL1	ANKRD26	AP3D1
ANPEP	BIVM	AK1	ANKRD28	AP4E1
ANTXR1	BLOC1S6	AK2	ANKRD34C	API5
ANXA6	BMPR1A	AKAP1	ANKRD36B	APLP2
AP1S1	BOLA2	AKAP13	ANKS6	APPL1
AP2B1	BOLA3	AKAP3	ANP32A	APPL2
AP2S1	BORA	AKAP8L	AP1M2	AQR
AP3D1	BROX	AKAP9	AP1S1	AR
AP5B1	BTC	AKR7A2	AP2M1	ARF6
APBA1	BTG4	AKT1	AP2S1	ARGLU1
APH1A	BUB3	AKT2	AP4B1	ARHGAP1
API5	C10orf55	AKT3	AP4E1	ARHGAP18
APLP2	C10orf90	ALDH3A1	APC	ARHGAP29
AQR	C11orf1	ALDOA	APLP2	ARHGAP30
ARGLU1	C12orf29	ALDOC	APOM	ARHGAP32
ARHGAP26	C12orf4	ALG13	APPL1	ARHGAP5
ARHGAP28	C12orf60	ALG3	APPL2	ARHGEF39
ARHGAP29	C12orf73	ALKBH5	AQR	ARID2
ARHGAP30	C14orf142	ALX3	AR	ARIH2
ARHGAP35	C16orf91	ANAPC4	ARF6	ARL6
ARHGEF10	C17orf98	ANAPC5	ARFGEF1	ARSD
ARHGEF39	C19orf52	ANGPTL2	ARFGEF2	ASAH1
ARID2	C1orf174	ANGPTL4	ARFGEF3	ASAP1
ARL13B	C1orf53	ANKHD1	ARFIP1	ASH1L
ARL6	C2orf76	ANKRD10-IT1	ARHGAP1	ASNA1
ARPC4	C3orf14	ANKRD11	ARHGAP18	ASPM
ARPC5	C4orf33	ANKRD12	ARHGAP32	ASXL1
ARPIN	C4orf46	ANKRD13C	ARHGAP5	ATAD2
ARTN	C5orf22	ANKRD13D	ARHGEF39	ATAT1
ARV1	C5orf24	ANKRD2	ARIH1	ATF1
ASAP1	C7orf60	ANKRD20A5P	ARIH2	ATG7
ASCC2	C9orf116	ANKRD36B	ARL2BP	ATP11A
ASH1L	C9orf89	ANKS6	ARL6IP5	ATP1B1
ASPM	CA2	ANP32A	ARSD	ATP2B1
ASXL2	CAB39	ANXA6	ASAH1	ATP5B
ATAD2	CALD1	AP1M1	ASAP1	ATP5S
ATAT1	CAPN7	AP1M2	ASCC1	ATP6V0B
ATF6B	CASKIN1	AP1S1	ASH1L	ATP6V0E1
ATF7IP	CAT	AP2A2	ASNA1	ATP6V1A
ATP11A	CCDC126	AP2M1	ASXL1	ATP8B1
ATP1B1	CCDC169	AP2S1	ATAD2	ATRX
ATP1B3	CCDC88A	AP3D1	ATF1	ATXN3
ATP2A3	CCNA2	AP4E1	ATF6	ATXN7L2
ATP2B1	CCNC	APCDD1	ATG7	AURKB
ATP2C1	CCNDBP1	APEX2	ATL1	B4GALT6
ATP6V0E1	CCNE2	API5	ATN1	BAD
ATP6V1A	CCNG2	APLP2	ATP11B	BAG2
ATP8B1	CCNYL1	APPL2	ATP11C	BAG4
ATRX	CCNYL2	APRT	ATP13A3	BAZ1B
ATXN3	CCT2	APTR	ATP1B1	BBIP1
AURKB	CD164	AQR	ATP2A2	BCAS4
B3GAT3	CD24	AR	ATP2B1	BCL2L11
B4GALNT1	CD274	ARF3	ATP5B	BCLAF1
BAD	CD44	ARF6	ATP6V0B	BCR
BAG4	CD46	ARFIP2	ATP6V1A	BDP1
BAG5	CD58	ARFRP1	ATP7A	BICD1
BAIAP2	CDC42	ARG2	ATPAF2	BICD2
BAX	CDC42SE2	ARHGAP1	ATRX	BIRC5
BAZ1B	CDK1	ARHGAP18	ATXN1	BLOC1S6
BBIP1	CDK2	ARHGAP21	ATXN3	BMPR1B
BBX	CDKN3	ARHGAP30	ATXN7L2	BMS1P5
BCAS4	CENPI	ARHGAP32	ATXN7L3B	BOLA2
BCL2L11	CENPU	ARHGAP42	AURKB	BRCA1
BCLAF1	CEP44	ARHGEF16	B4GALT6	BRCA2
BDP1	CEP76	ARHGEF39	BAG2	BRCC3
BEND4	CFL2	ARID1A	BAG4	BRD2
BICD1	CHD9	ARID1B	BCL2L11	BRD3
BICD2	CHPT1	ARID2	BCLAF1	BRD4
BIRC5	CHRNA5	ARIH2	BCR	BTC
BIRC6	CHURC1	ARL2	BDP1	BUB1
BIRC7	CLDND1	ARMC12	BICD2	BUB3
BLOC1S6	CLN5	ARMC9	BMPR1B	C10orf55
BLZF1	CMC1	ARRB2	BMPR2	C11orf1
BMP8B	CNN3	ARSA	BMS1P5	C1orf43
BOK	CNOT4	ARSD	BRCA1	C21orf33
BOLA2	CNTNAP4	ARX	BRCA2	C5orf22
BPNT1	COCH	ASAP1	BRCC3	C5orf24
BRCA1	COL6A6	ASAP1-IT2	BRD4	C9orf116
BRCA2	COMMD10	ASB16	BRWD1	C9orf142
BRCC3	COPS8	ASCL1	BRWD3	CAB39
BRD2	CPNE3	ASF1B	BUB1	CACNA1H
BRD3	CR1L	ASH1L	BUB3	CACUL1
BRD4	CRADD	ASNA1	BZW1	CALCOCO2
BRIP1	CREB3L2	ASXL1	C10orf88	CALD1
BRK1	CREM	ATF1	C11orf57	CALR
BTBD7	CRIM1	ATF5	C12orf40	CALU
BTC	CRK	ATG4A	C16orf95	CAMK1
BTG1	CRLS1	ATG4B	C17orf80	CAMK2D
BTNL9	CRYZL1	ATG7	C19orf18	CAMKK2
C10orf55	CTBS	ATP13A1	C1orf43	CAMSAP2
C11orf1	CXADR	ATP2C2	C21orf33	CAMSAP3
C11orf30	CXCL5	ATP5B	C2orf49	CAND1
C14orf180	CXCL8	ATP5D	C5orf22	CAPG
C15orf57	CYB5R4	ATP5L	C8orf33	CAPN1
C18orf54	CYB5RL	ATP5O	C8orf4	CAPN7
C1orf109	CYBRD1	ATP5S	CAB39	CAPNS1
C1orf43	CYC1	ATP5SL	CACNA1D	CAPZB
C21orf33	DAAM1	ATP6	CACUL1	CARS
C21orf58	DCBLD2	ATP6V0A1	CADPS	CASC5
C2CD4A	DCTD	ATP6V0B	CALCOCO2	CASP2
C5orf24	DCTN4	ATP6V0C	CALD1	CAT
C5orf30	DCUN1D1	ATP6V0D1	CALU	CBFA2T2
C5orf34	DEF8	ATP6V0D2	CAMK1	CBL
C6orf62	DEPDC1	ATP6V1A	CAMK2D	CBLB
C6orf89	DERA	ATP6V1B1	CAMSAP2	CBS
C7orf31	DHX40	ATP8A2	CAMSAP3	CBX3
C9orf116	DIMT1	ATP8B1	CAND1	CBX4
C9orf142	DIS3	ATXN7L2	CANX	CBX5
CAB39	DKK3	AURKAIP1	CAP1	CC2D1A
CACNA1H	DLC1	AURKB	CAPG	CCDC126
CALD1	DLG1	B4GALNT3	CAPN7	CCDC186
CALM3	DNAAF5	B4GALT6	CAPNS1	CCDC88A
CALR	DNAJB4	BACE2	CAPRIN1	CCND1
CAMK2D	DNAJB9	BAD	CAPZB	CCNE2
CAMKK2	DNAJC18	BAG6	CARNMT1	CCNG2
CAND1	DNAJC19	BANF1	CARS	CCNI
CAPN1	DOCK1	BAP1	CASC5	CCNL2
CAPZB	DOCK5	BATF2	CASC7	CCNT1
CARD14	DPF3	BAZ1B	CASK	CCNT2
CARD8	DPH3	BBS1	CASP2	CCNYL1
CARS	DPH6	BCKDK	CASP8	CCT2
CASC5	DPY19L2	BCL2L11	CAT	CD151
CATSPER1	DUS4L	BCL6B	CBFA2T2	CD44
CBL	E2F5	BCORL1	CBLB	CD58
CBS	EDEM3	BCR	CBX4	CD99
CBX3	EEF1E1	BDH1	CBX5	CDC14B
CBX5	EFNA5	BHLHE40	CC2D1A	CDC25A
CCAR1	EGFR	BICD1	CC2D1B	CDC37
CCDC134	EIF4B	BIN1	CCDC117	CDC42
CCDC176	EMC4	BIN3-IT1	CCDC186	CDC42BPB
CCDC186	EMC7	BLNK	CCDC88A	CDC42SE2
CCDC187	ENPEP	BLOC1S1	CCDC93	CDC5L
CCDC37	ENPP1	BLOC1S3	CCL20	CDC6
CCDC50	ENPP5	BLVRA	CCNE2	CDK1
CCDC57	EPHX4	BMPR1B	CCNG2	CDK16
CCDC82	EPOR	BMS1P5	CCNL2	CDK2
CCDC88A	ERCC8	BORCS8	CCNT1	CDS2
CCDC91	ERI1	BPTF	CCNT2	CDV3
CCL28	ERLIN1	BRD2	CCT2	CEBPZOS
CCND1	ERO1A	BRD3	CD151	CELF1
CCNI	ESCO1	BRD4	CD47	CELSR1
CCNK	ESRRB	BTBD2	CD99	CENPU
CCNT1	EXOC5	BTBD9	CDC14B	CEP290
CCNYL1	EXOSC3	BTG2	CDC25A	CEP295
CCPG1	FAM104B	BTNL8	CDC27	CEP44
CCSER2	FAM111B	BTRC	CDC37	CEP57
CCT2	FAM120A	BUB1	CDC42	CFL1
CD33	FAM149B1	C10orf10	CDC5L	CGN
CD40	FAM175A	C10orf107	CDC6	CHAF1A
CD58	FAM188A	C11orf31	CDH1	CHD1L
CD99P1	FAM200A	C11orf73	CDK1	CHD2
CDC14B	FAM201A	C11orf74	CDK16	CHD9
CDC25A	FAM206A	C12orf43	CDK2	CIRBP
CDC37	FAM214A	C16orf13	CDKN2A-AS1	CIRH1A
CDC42BPA	FAM71B	C16orf58	CDRT1	CLASP2
CDC42BPB	FAM76A	C16orf70	CDS2	CLDN3
CDC42SE1	FAM83D	C16orf87	CDV3	CLIP1
CDC42SE2	FANCM	C16orf92	CEACAM6	CLMN
CDC5L	FAR1	C18orf8	CEBPZOS	CLN8
CDC73	FAS	C19orf24	CELF1	CLU
CDCA2	FBXL4	C19orf43	CENPJ	CMTM4
CDCA7	FBXO22	C19orf53	CEP104	CNN3
CDK10	FBXO28	C19orf68	CEP162	CNOT6L
CDK12	FBXO3	C1orf228	CEP290	COCH
CDK13	FBXO5	C1orf233	CEP57	COPA
CDK2	FBXO8	C1orf68	CFL1	COPS7B
CDK8	FCHSD2	C1R	CGGBP1	CPEB4
CDKAL1	FDX1	C20orf196	CGN	CPM
CEBPD	FGD5-AS1	C21orf2	CHD1L	CPNE1
CEBPZOS	FGD6	C22orf34	CHD2	CPNE3
CELF1	FGF12	C2CD4B	CHEK1	CREB3L2
CELF2	FGFR1OP2	C2orf61	CIRBP	CRIM1
CELSR1	FH	C5orf22	CIRH1A	CRK
CENPU	FHL1	C5orf63	CKAP4	CROCCP2
CEP164	FKBP15	C6orf118	CLASP2	CRTAP
CEP290	FRYL	C6orf136	CLCC1	CRYZL1
CEP295	FUT8	C7orf26	CLCN3	CSAD
CEP350	G2E3	C8G	CLDN1	CSNK1A1
CEP44	GAB1	C8orf82	CLDN23	CSNK1G1
CEP57	GAL	C9orf142	CLINT1	CSNK2A1
CEP68	GALNT12	C9orf16	CLIP1	CTBP1
CERS6	GALNT7	CA5BP1	CLK4	CTBS
CFAP43	GATM	CABP4	CLMN	CTNNB1
CFL1	GBP2	CABYR	CLMP	CTTN
CFLAR	GCFC2	CACNA1H	CLU	CUL4A
CGN	GCSH	CACNA1I	CMTM4	CUX1
CHAF1A	GDE1	CACNB3	CNOT10	CWF19L1
CHD1L	GDI2	CACNG2	CNOT2	CXADR
CHD2	GFM1	CACUL1	CNOT6L	CXCL8
CHD4	GFM2	CADM4	CNST	CYB5R4
CHD9	GIN1	CALCOCO2	CNTNAP2	CYB5RL
CHML	GKN2	CALR	CNTRL	CYBRD1
CHRNB1	GLIPR1	CALU	COLCA2	CYTH3
CHTOP	GLRX	CAMK1	COPA	DAAM1
CLASP2	GLRX3	CAMK2D	COPG2	DAG1
CLDN3	GLUD1	CAMK2G	CPD	DAGLB
CLIP1	GLUD2	CAMK2N1	CPEB4	DAXX
CLMN	GNB5	CAMKK2	CPM	DBT
CLN6	GNG12	CAMSAP2	CPNE1	DCAF17
CLN8	GNG4	CAMSAP3	CPNE3	DCAF7
CLPTM1	GNPDA2	CAPG	CPO	DCAF8
CMTM4	GPCPD1	CAPN1	CPSF2	DCBLD2
CNN3	GPD2	CAPNS1	CREBL2	DCTN4
CNNM2	GPHN	CAPS	CRK	DCUN1D1
CNPY3	GPR160	CAPZB	CROCCP2	DCXR
CNTLN	GPX2	CARS	CROT	DDA1
COCH	GRB14	CASP2	CRTAP	DDHD1
COG5	GSPT1	CBFA2T2	CSDE1	DDX11
COL1A1	GSTCD	CBL	CSNK1A1	DDX17
COL26A1	GULP1	CBLB	CSNK2A1	DDX3Y
COL4A3BP	HACE1	CBS	CSTF1	DEF8
COL8A2	HAUS5	CBX3	CTDSPL2	DEPDC1
COPS7B	HAUS6	CBX4	CTNNB1	DERA
CORO2A	HCCS	CBX5	CUEDC1	DHPS
COX5B	HDGFRP3	CBX6	CUL1	DHX9
CPM	HERC4	CC2D1A	CUL4A	DICER1
CPNE3	HHEX	CCDC124	CUL5	DIMT1
CPNE8	HINT3	CCDC126	CUX1	DKK3
CREB1	HIST1H2BE	CCDC80	CWF19L1	DLC1
CREB3L2	HMGA2	CCDC97	CYB5R4	DLEU2
CREBRF	HNRNPLL	CCL22	DAG1	DLG1
CREG1	HRASLS	CCNB3	DAGLB	DLGAP4
CRIM1	HRSP12	CCND1	DAXX	DNAAF5
CRIPT	HS1BP3	CCNG2	DBT	DNAJB14
CRK	HSF2	CCNI	DCAF13	DNAJB4
CRTAP	HSP90AB1	CCNJL	DCAF16	DNAJC18
CRYZL1	HSPA14	CCNL2	DCAF6	DNAJC3
CSAD	HYPM	CCNT2	DCAF7	DOCK1
CSGALNACT2	IAH1	CCSER1	DCAF8	DOCK5
CSNK1A1	ID2	CD151	DCN	DPF3
CSNK1G1	IDI2-AS1	CD320	DCST2	DSC2
CSNK1G2	IFNGR1	CD44	DCTN1-AS1	DSG2
CSNK2A1	IGFBP3	CD5	DCTN4	DUS4L
CSPP1	IL17RC	CD6	DCUN1D1	DUSP3
CSRNP2	IMMP2L	CD81	DCXR	DYNC1H1
CST6	IMPAD1	CD99	DDA1	E2F3
CTBP1	ING1	CDC14B	DDHD1	ECT2
CTBP2	INTS4	CDC20	DDX11	EDC3
CTBS	IPP	CDC37	DDX17	EDEM3
CTC-338M12,4	ITCH	CDC37L1	DDX18	EEF1D
CTNNA1	ITGA6	CDC42BPB	DDX3X	EEF1E1
CTNNA2	ITGB1	CDC42BPG	DDX3Y	EFHC1
CTTN	ITPR2	CDC42EP4	DDX42	EFNA5
CUL4A	KBTBD2	CDC6	DENND1B	EGFR
CUX1	KCNRG	CDCA4	DEPDC4	EHBP1
CWF19L1	KDELR3	CDH15	DHPS	EID1
CXCL8	KDM6A	CDH23	DHX9	EIF2AK2
CXorf40A	KIAA1551	CDH4	DIAPH1	EIF3B
CXorf40B	KIF13A	CDK1	DICER1	EIF4B
CYB5RL	KLHL12	CDK14	DLEU2	EIF4E2
CYBA	KLHL5	CDK16	DLG1	EIF5A
CYBRD1	KLHL7	CDK19	DNAAF5	EIF5B
CYP3A4	KLRF1	CDK2AP2	DNAH11	ELK1
CYR61	KPNA5	CDK4	DNAJB14	ELK4
CYTH3	KRCC1	CDS2	DNAJB4	EMC1
DAAM1	L3HYPDH	CDV3	DNAJC13	EME1
DAB2IP	LACTB	CELF1	DNAJC3	EME2
DARS	LACTB2	CELSR1	DSC2	ENO1
DBIL5P	LAMA2	CELSR3	DSG2	ENPEP
DBT	LAMTOR3	CENPB	DTL	ENPP5
DCAF10	LAPTM4B	CENPE	DUS3L	ENSA
DCAF17	LARP1B	CENPF	DUSP3	ENTPD7
DCAF7	LARP4	CENPN	DYNC1H1	EPHX1
DCAF8	LARP4B	CENPV	DYNC2LI1	EPOR
DCBLD2	LATS1	CEP120	DYRK2	EPRS
DCTN2	LGALSL	CEP19	DYRK3	ERC1
DDHD1	LHFP	CEP295	E2F3	ERCC8
DDX11	LIMA1	CEP70	ECT2	ERGIC3
DDX17	LINC00652	CEP78	EDC3	ERI1
DDX24	LINC00662	CEP85	EDEM3	ERI2
DDX3Y	LINC00669	CERS2	EFHC1	ERICH1-AS1
DEFB121	LINC00973	CERS4	EGFR	ERLIN1
DENND4C	LINC01588	CFAP126	EHBP1	ESCO1
DEPDC1	LINC01607	CFAP97	EHF	EWSR1
DESI2	LIPT1	CFL1	EID1	EXOC3
DFNB31	LMAN1	CFTR	EIF2AK2	EXOC4
DGCR11	LMBR1	CHAF1A	EIF2S1	EXOC5
DGCR9	LMBRD2	CHAMP1	EIF3B	EXOC6
DHX29	LMF1	CHCHD10	EIF4B	EXOSC2
DHX36	LOC100129917	CHCHD7	EIF4E2	EXPH5
DHX9	LOC100506731	CHD1L	EIF4EBP2	EYA1
DICER1	LOC101927027	CHD2	EIF5A	EZR
DIMT1	LOC101928663	CHD7	EIF5B	F11R
DKFZP434L187	LOC101929747	CHD8	ELOVL2	FAAP20
DKK3	LOC105371967	CHDH	EME2	FAF2
DLC1	LOC283140	CHKA	EMID1	FAM104B
DLEU2	LOC283856	CHRD	ENC1	FAM111B
DLG1	LOC645513	CHRM3	ENDOD1	FAM120A
DLGAP4	LOX	CHST12	ENO1	FAM124A
DLX6	LPP	CHST3	ENOSF1	FAM149B1
DMXL1	LRIG3	CIAPIN1	ENPP5	FAM173B
DNAAF5	LRP12	CIART	ENTPD7	FAM175A
DNAJB14	LRRC16A	CINP	EPHX1	FAM200B
DNAJC1	LRRC28	CIRBP	EPRS	FAM201A
DNAJC14	LRRFIP2	CIRH1A	ERC1	FAM206A
DNAJC18	LRRIQ3	CITED2	ERCC6L2	FAM208B
DNAJC21	LSM6	CIZ1	ERGIC3	FAM46D
DNAJC24	LXN	CLASP2	ERI2	FAM63B
DNAJC3	LY6K	CLCN5	ERICH1-AS1	FAM76A
DNAJC7	LYPLA1	CLDN3	ERICH5	FANCM
DNASE1L1	M6PR	CLDN7	ERLIN1	FAR1
DNASE2	MAD2L1	CLEC7A	ESCO1	FBRSL1
DNPH1	MAGT1	CLIC6	EWSR1	FBXL4
DOCK1	MALAT1	CLIP1	EXOC3	FBXO22
DOCK5	MALT1	CLMN	EXOC4	FBXO8
DPY19L1	MAN2A1	CLN8	EXOC5	FBXO9
DPY19L4	MAP3K7	CLSTN1	EXOC6	FCHO1
DR1	MAP3K8	CLTB	EXOSC2	FER
DSC2	MARCH5	CLU	EXPH5	FGD6
DSG2	MARCH7	CNNM3	EZR	FGFR1
DSG2-AS1	MBNL1	CNOT6L	F11R	FGFR1OP2
DUS4L	MCEE	CNTROB	FAF2	FGFRL1
DUSP15	MDM4	COG1	FAM104B	FH
DUSP4	ME2	COL13A1	FAM111B	FIGNL1
DYNC1H1	MED18	COL6A1	FAM126B	FKBP4
DYNC1LI2	MED30	COLCA1	FAM169A	FLII
E2F3	MED6	COMT	FAM172A	FLJ37453
EAF2	MFAP3	COPA	FAM173B	FLNA
EBF4	MFN1	COPE	FAM175A	FNBP4
ECT2	MGAT2	COPG1	FAM210B	FNDC3B
EDEM3	MGEA5	COPS4	FAM46D	FOXN3
EEF1D	MIF-AS1	COPS7B	FAM49A	FOXO3
EEF1E1	MINCR	COPZ1	FAM60A	FOXP1
EFCAB7	MIPOL1	COQ9	FAM63B	FRYL
EFHC1	MIS18BP1	COTL1	FAM76A	FTSJ1
EFNA5	MOB1A	COX1	FAM76B	FTX
EGFR	MPC2	COX16	FANCB	FUBP3
EGR1	MRPL30	COX19	FANCD2	FUS
EHBP1	MRPL50	COX2	FANCM	FUT8
EHBP1L1	MRPS12	COX7B2	FAR1	FXR1
EHD4	MRPS15	CPEB3	FBXL20	G2E3
EID1	MRPS36	CPEB4	FBXO18	G3BP1
EIF2AK2	MSH2	CPNE1	FBXO21	GAB1
EIF2S3	MSH6	CPNE2	FBXO38	GABRB3
EIF3B	MTAP	CPQ	FBXO7	GALNT2
EIF3C	MTF2	CPSF3L	FBXW11	GALNT6
EIF3H	MTHFD2L	CPSF6	FCHO1	GALNT7
EIF4G1	MTPAP	CPSF7	FER	GANC
EIF5A	MTPN	CRABP2	FGF8	GAPDH
EIF5B	MZT1	CRACR2B	FGFR1OP2	GAREM
ELF1	N6AMT1	CRAMP1	FIGNL1	GART
ELK1	NA	CRIPAK	FKBP4	GBF1
ELK3	NAB1	CRK	FKBP5	GBP2
ELK4	NADK2	CRLF2	FLII	GDI2
ELMO2	NAMPT	CROCCP2	FLJ37453	GFM1
ELOVL7	NBEAL1	CRTAP	FNBP4	GFM2
EMC1	NBN	CRYBB2	FNDC3A	GGA1
EMC3	NCK1	CS	FNDC3B	GIGYF1
EME1	NDFIP2	CSAD	FNIP1	GLE1
EML4	NDUFB5	CSNK1A1	FOXA1	GLG1
EMP1	NDUFS4	CSNK1G1	FOXD3	GLUD2
ENDOV	NEDD1	CSNK1G3	FOXN3	GLUL
ENO1	NEK2	CSNK2B	FOXO3	GMEB1
ENPEP	NEMP2	CST3	FOXP1	GNA11
ENPP4	NFIB	CSTF2T	FRMD6	GNAI2
ENPP5	NFYA	CTBP1	FRYL	GNAS
ENSA	NFYB	CTBP1-AS	FTX	GNB1
EP300	NLRP1	CTBP1-AS2	FUBP3	GNB5
EP400	NMD3	CTDSPL	FUS	GNL3L
EPB41L2	NME7	CTNNB1	FXR1	GOLIM4
EPG5	NMU	CTNND2	FYTTD1	GOSR1
EPRS	NNT	CTSA	G2E3	GPHN
ERC1	NPAP1	CTSB	G3BP1	GPI
ERGIC1	NPC1	CTTN	GABRB3	GPR160
ERI1	NPEPPS	CUEDC2	GAD2	GPR63
ESF1	NPHP1	CUX1	GALNT2	GPRC5B
EVPL	NSUN3	CXADR	GALNT7	GPRIN1
EWSR1	NT5E	CXCL16	GANC	GPS1
EXOC4	NUDCD1	CXXC1	GAPDH	GPS2
EXPH5	NUDCD2	CXXC1P1	GART	GRB2
EXT1	NUP160	CYB561	GAS2L3	GSK3B
EYA1	NUP37	CYB5D1	GDAP2	GSPT1
EZR	NUP58	CYBRD1	GDF11	GSS
F11R	OCIAD1	CYHR1	GDI2	GSTCD
F2RL2	ODF2L	CYP11B2	GEMIN8	GTSE1
FAAP20	OGFRL1	CYP2C19	GFM1	GUCA1A
FAF2	OGT	CYP2E1	GFM2	H2AFX
FAM106A	OIP5	CYTH3	GGNBP2	HACD1
FAM111B	ORC5	D21S2088E	GLE1	HACD2
FAM114A1	ORMDL1	DAG1	GLG1	HADHA
FAM120A	OSMR	DAGLB	GLUD2	HAUS5
FAM124A	OTUB2	DAP	GLUL	HAUS6
FAM13A	OTUD1	DAPK3	GNA11	HDGFRP3
FAM149B1	OXR1	DAXX	GNAI3	HECTD1
FAM161A	PAPOLA	DBN1	GNAS	HELLS
FAM161B	PAPSS2	DCAF17	GNB1	HELZ
FAM168A	PARPBP	DCAF7	GNG11	HERC4
FAM173A	PCGF5	DCUN1D1	GNL3L	HES4
FAM173B	PCIF1	DCXR	GOLIM4	HHEX
FAM200B	PCMTD1	DDA1	GOSR1	HIPK2
FAM201A	PCNP	DDOST	GPAM	HLA-C
FAM204A	PDE12	DDX11	GPHN	HLA-F
FAM206A	PDE6D	DDX17	GPI	HMG20B
FAM208B	PDE7A	DDX19A	GPR63	HMGB1
FAM26F	PDE8A	DDX39A	GPS1	HNRNPC
FAM3C	PDGFD	DDX41	GPS2	HNRNPD
FAM63A	PDP1	DDX52	GRAP2	HNRNPH1
FAM63B	PDP2	DDX54	GRB10	HOMER2
FARSB	PERP	DDX56	GRB2	HOXB13
FBRSL1	PEX1	DDX58	GREB1L	HPCAL1
FBXL19	PEX13	DDX6	GRIA4	HPS1
FBXL4	PEX2	DEAF1	GRPEL2	HSP90AA1
FBXO8	PGAP1	DEF8	GSK3B	HSP90AB1
FBXO9	PGGT1B	DEGS2	GSN	HSP90B1
FBXW2	PGRMC1	DENND4B	GSPT1	HSPD1
FCF1	PHACTR2	DERA	GSS	HSPH1
FCHSD1	PHF20L1	DGCR7	GTF2H1	HTRA2
FER	PHTF2	DGKB	GTF3C4	ID1
FERMT1	PICALM	DGKD	GUCA1A	ID3
FERMT2	PIGC	DGKE	GUCY1A3	ID4
FEZ2	PIGF	DHCR7	GXYLT1	IDH3B
FGD4	PIGX	DHPS	HACD2	IFT52
FGD6	PIK3CA	DHRS11	HADHA	IGF1R
FGF7	PIK3CD-AS1	DHX30	HAL	IGF2-AS
FGFR1	PKD1L2	DHX57	HAUS6	IGF2R
FGFRL1	PKIA	DIO3	HCG4B	IL17RB
FH	PLA2G12A	DIP2A	HCRTR1	IL17RC
FICD	PLA2G4A	DIP2C	HDGFRP3	IL1RAP
FKBP4	PLGRKT	DKFZP434A062	HDHD3	IL6ST
FKBP7	PLSCR1	DLEU2	HEATR1	ILF3
FKSG49	PNPLA4	DLG1	HEATR5B	IMMP2L
FLJ42627	POLE4	DLGAP1	HECTD1	ING1
FLNA	POLK	DLGAP4	HELLS	INO80D
FLT1	POPDC3	DLL3	HHATL	IQGAP1
FMNL2	PPA2	DMAP1	HIBADH	IRF6
FNBP4	PPIL3	DNAAF3	HIPK2	IRF9
FNDC3B	PPM1A	DNAAF5	HLA-C	ISG20L2
FNTA	PPP1CB	DNAH6	HLA-F	ITCH
FOLR1	PPP2R5C	DNAH9	HMG20B	ITGA6
FOSL2	PPP3CC	DNAJB5	HMOX2	ITGB1
FOXN3	PQLC2L	DNAJC22	HNCAT21	ITPKB
FOXO3	PRDM5	DNAJC4	HNRNPA3	ITSN1
FOXP1	PRDX3	DNAJC5	HNRNPC	IVD
FREM2	PRELID3B	DNMBP	HNRNPD	IWS1
FRG1BP	PRICKLE1	DOCK1	HNRNPH1	JAG1
FRK	PRIM1	DOCK6	HOMER2	KAT7
FRMD5	PRIM2	DPCD	HOXA11	KAZN
FRMD6-AS1	PRKACB	DPF3	HOXB13	KBTBD2
FRYL	PRKAG2	DPM2	HPS1	KBTBD4
FSD1L	PRKAG2-AS1	DPP7	HSP90AA1	KCNK3
FTSJ1	PRKAR1A	DRAM2	HSP90AB1	KCTD5
FTX	PRKAR2B	DRAP1	HSP90B1	KDELR1
FUS	PRKCI	DRD4	HSPA13	KDM1B
FUT8	PRMT2	DSC2	HSPD1	KDM4B
FXR1	PRMT6	DSG2	HSPH1	KDM6A
FYN	PRMT9	DUSP22	HTRA2	KDM6B
FZD2	PRNP	DUSP3	ICE2	KIAA0100
G3BP1	PRPF4B	DVL3	ID1	KIAA0485
GAB1	PRPS2	DXO	ID3	KIAA1024
GABPB1-AS1	PRRG3	DYNLRB1	ID4	KIAA1147
GADD45B	PSMB8-AS1	DYNLRB2	IDH3A	KIAA1324L
GALK1	PSMD10	EBI3	IDH3B	KIAA1551
GALK2	PSMD12	ECE2	IFT22	KIAA2026
GALNT10	PSTK	ECHDC2	IFT52	KIF13A
GALNT14	PTAR1	EDC3	IGF2R	KIFC2
GALNT5	PTP4A1	EDEM3	IL17RB	KLF13
GALNT6	PTPN11	EDRF1	IL17RC	KLHL12
GAPDH	PTPN12	EEF1D	IL1RAPL1	KLHL24
GAREM	PTPRG	EFTUD2	IL6ST	KLHL28
GART	PTPRG-AS1	EGFR	ILF3	KLHL5
GATA2	PXK	EGLN2	IMMP2L	KLHL7
GATAD1	RAB1A	EHBP1	ING1	KLK3
GATC	RAB23	EHMT2	ING3	KMT2A
GBF1	RAB5A	EIF2AK1	INO80D	KMT2C
GBP2	RAB8B	EIF3B	IQCA1	KMT2D
GCLC	RAB9A	EIF4B	IQCH-AS1	KPNA5
GEM	RAD21	EIF4E2	IQGAP1	KPNA6
GFM1	RAD51B	EIF4EBP1	IRF6	KRCC1
GFM2	RAD51C	EIF4G3	IRF9	KRR1
GGA1	RANBP9	EIF5A	ISG20L2	L2HGDH
GIGYF1	RAP1GDS1	EIF5B	ITCH	L3MBTL2
GINS4	RARRES1	ELAC2	ITGA6	LAMP1
GIPC2	RARS2	ELAVL3	ITGB1	LAPTM4B
GLG1	RASSF3	ELAVL4	ITGBL1	LARP1
GLTP	RBBP4	ELF3	ITPKB	LARP1B
GLTSCR1	RBM26	ELK1	ITSN1	LARP4
GMEB1	RBMS3	ELK4	IVD	LARP4B
GMPS	RCN2	ELL	IWS1	LATS1
GNA11	RDX	ELMO3	JAG1	LHFP
GNAI2	REXO2	ELN	JAK2	LIAS
GNAL	RFC3	ELP5	KAT6B	LIG3
GNAQ	RFC5	EMC1	KAT7	LIN37
GNAS	RFESD	EME1	KBTBD2	LINC00630
GNB1	RFWD2	EME2	KBTBD4	LINC01296
GNB5	RFX7	ENO1	KCNK1	LINC01588
GNL3L	RGS10	ENO1-AS1	KCNK3	LINC01607
GOLIM4	RGS5	ENSA	KCTD5	LIPT1
GON4L	RHEB	ENTPD7	KCTD6	LMAN1
GOPC	RHOQ	EP400NL	KDELR1	LMBR1
GOSR1	RICTOR	EPHX1	KDM4A	LMBRD2
GPALPP1	RIOK3	EPOR	KDM6B	LMCD1
GPANK1	RIPK2	EPPK1	KIAA0100	LMNA
GPATCH2L	RLN2	EPS8L1	KIAA0232	LOC100190986
GPATCH4	RNASEH1	ERAL1	KIAA0368	LOC100272216
GPATCH8	RNF7	ERBB3	KIAA0485	LOC100507654
GPBP1L1	RNLS	ERCC1	KIAA1024	LOC102723661
GPR146	ROCK1	ERCC8	KIAA1033	LOC105373150
GPR160	RPE	ERGIC3	KIAA1109	LOC645513
GPRC5B	RPL15	ERI2	KIAA1147	LOC728868
GPRIN1	RPRD1A	ERI3	KIAA1324L	LOC729732
GPRIN2	RPS10	ERICH1-AS1	KIAA1551	LOC81691
GRB2	RPS11	ERN1	KIAA2026	LOX
GSAP	RPS23	ERVH-6	KIDINS220	LPGAT1
GSPT1	RPS27L	ETV5	KIF13A	LPP
GTF2F1	RPS6KA2-AS1	EVC	KIF23	LRCH3
GTF3A	RRM1	EVL	KIF2C	LRP10
GTF3C3	RSL24D1	EWSR1	KIF3A	LRP12
GTSE1	RWDD2B	EXOC3	KLC1	LRP5
H2AFX	RXRB	EXOC3L4	KLF13	LRP8
H3F3A	RYK	EXOC5	KLHL12	LRRC41
HAB1	SAMD12	EXOC6	KLHL23	LRRC58
HACD1	SAMHD1	EXOC7	KLHL24	LRRFIP1
HACD3	SAP18	EXOSC2	KLHL28	LSG1
HADHA	SAR1B	EXOSC6	KLHL3	LSM6
HAUS2	SARAF	EXPH5	KLHL8	LUC7L3
HAUS5	SBF2-AS1	EYA1	KLK3	LYN
HCG18	SCAF11	EZR	KMT2A	LYPLA1
HCRP1	SCAMP1	F11R	KMT2C	MAATS1
HDAC6	SCML1	FAAH	KPNA1	MACROD1
HEATR3	SCO2	FAAP100	KRCC1	MAD2L1
HECTD1	SCOC	FAAP20	KRTAP1-3	MAGT1
HELLS	SCP2	FAF1	KSR2	MALAT1
HELZ	SDC2	FAM105A	KY	MAN2A1
HERC4	SDHAF3	FAM120A	L2HGDH	MAP1LC3B
HERPUD2	SDHD	FAM124A	L3MBTL2	MAP2K2
HES1	SDPR	FAM129B	LAMP1	MAP2K5
HES4	SEC11C	FAM168B	LANCL1	MAP2K7
HFE	SEC22B	FAM173B	LAPTM4B	MAP3K2
HGS	SEC22C	FAM175A	LARP1	MAP3K7
HHEX	SEC23A	FAM181B	LARP4	MAPK7
HIC2	SELT	FAM193A	LATS1	MAPK8
HINT1	SENP8	FAM195A	LCP2	MAPT
HIP1	SET	FAM200B	LHX6	MARCH6
HIPK2	SETD4	FAM208B	LIAS	MBNL1
HIST1H2AK	SFT2D1	FAM219B	LIG3	MBP
HMGB1	SGPP1	FAM222B	LIN37	MBTPS1
HMGCS1	SIVA1	FAM234A	LINC00208	MCM3AP-AS1
HMGXB4	SKIL	FAM234B	LINC00342	MDM4
HNRNPA0	SLAMF8	FAM3D	LINC00708	ME2
HNRNPC	SLC25A37	FAM43A	LINC01296	MED1
HNRNPD	SLC25A46	FAM46D	LINC01366	MED18
HNRNPH1	SLC2A10	FAM57B	LMBR1	MEGF6
HNRNPM	SLC2A13	FAM63B	LMBRD1	METTL17
HNRNPUL2	SLC30A5	FAM69B	LMCD1	MFAP3
HOMER3	SLC30A6	FAM71E2	LOC100190986	MFN1
HOOK3	SLC31A2	FAM76A	LOC100272216	MFSD6
HPCAL1	SLC33A1	FAM83C	LOC100506895	MGA
HRH1	SLC35F2	FAM84B	LOC100507494	MGEA5
HS3ST2	SLC35F5	FAM98A	LOC100507654	MIA3
HSP90AA1	SLC36A4	FAM98C	LOC101926907	MIER1
HSP90AB1	SLC38A10	FANCA	LOC101928271	MIER3
HSP90B1	SLC39A6	FASN	LOC101929064	MIF-AS1
HSPA4	SLC39A8	FBN3	LOC102723526	MIPOL1
HSPA6	SLC41A2	FBRSL1	LOC102723661	MIS18A
HSPD1	SLC9C2	FBXL3	LOC105371622	MIS18BP1
HSPH1	SMAD4	FBXL4	LOC105373150	MLEC
ICK	SMAD7	FBXL6	LOC105378732	MLLT10
ID1	SMIM19	FBXO2	LOC257396	MOCS2
IFI44	SNAPC3	FBXO22	LOC283485	MPC2
IFIH1	SNX2	FBXO32	LOC284950	MPRIP
IFIT2	SNX3	FBXO42	LOC388456	MRPL30
IFNAR2	SNX4	FBXO9	LOC401176	MRPL38
IFT140	SOCS2	FBXW5	LOC440434	MRPL4
IFT27	SOS2	FBXW7	LOC554207	MRPL52
IFT52	SPATA7	FCHO1	LOC644852	MRPS12
IFT57	SPIN3	FGD2	LOC728868	MRPS15
IFT80	SPTLC1	FGF3	LOC729732	MRPS18B
IGF1R	SQLE	FGFR1	LOC729970	MRPS36
IGF2-AS	SRD5A3	FGFR2	LOC81691	MRPS5
IGF2BP3	SRPK2	FGFRL1	LPGAT1	MRTO4
IGF2R	SRPR	FHOD1	LPP	MSH6
IKZF4	SRSF12	FIGNL1	LRAT	MSI2
IL10RB-AS1	SRSF3	FIS1	LRCH3	MTAP
IL1R1	SRSF4	FKBP1A	LRFN2	MTDH
IL1RAP	SS18	FKBP4	LRP12	MTF2
IL31RA	SSBP2	FKBP6	LRP5	MTHFD2L
IL6R	SSR3	FLCN	LRP8	MTMR6
IL6ST	SSX2IP	FLII	LRRC41	MTPAP
ILF3	ST3GAL6	FLJ37453	LRRC58	MTUS1
ILF3-AS1	STARD6	FLNA	LSG1	MYEOV
INADL	STAT1	FLNB	LTN1	MYH10
ING5	STEAP1	FLOT1	LY6G6C	MYO1B
INHBC	STK32B	FMNL3	LYN	MYO6
INIP	STYX	FNBP4	LYPLA1	NA
INO80D	SYNC	FNDC3B	MACROD1	NAA25
IQGAP1	SYT1	FNDC5	MAF	NADK
IRAK3	TACR2	FOXN3	MALAT1	NAMPT
IRS1	TADA2A	FOXO1	MAML2	NAP1L4
ISG20L2	TAF4B	FOXO3	MAN1A2	NASP
ITCH	TAGLN	FOXP4-AS1	MAN2A1	NAV1
ITFG1	TAS2R50	FOXRED1	MAP1LC3B	NBEAL1
ITGA2	TBC1D31	FOXRED2	MAP2K4	NCK1
ITGA6	TCEAL8	FPGS	MAP2K5	NCOA1
ITGB1	TEP1	FRMD8	MAP2K7	NCOA2
ITGB5	TFPI2	FRMPD4	MAP3K2	NCOA3
ITPK1-AS1	THAP1	FSCN1	MAP3K7	NCOR1
ITPKA	THUMPD3	FTSJ1	MAP4K5	NDRG3
ITPRIPL2	TIA1	FTX	MAPK10	NDUFV1
ITSN1	TIFA	FUBP3	MAPK8	NEDD1
IVD	TLK1	FUK	MARC2	NEK2
IWS1	TM2D1	FUNDC2	MARCH6	NEMF
JAK1	TM4SF1	FUS	MAX	NF1
JSRP1	TMA16	FXR1	MBNL1	NFAT5
JUN	TMBIM4	G3BP1	MBNL1-AS1	NFIB
KATNBL1	TMCO1	GABARAP	MBP	NFIC
KAZN	TMED2	GABBR1	MBTPS1	NFKBIZ
KCNJ14	TMEM126B	GABRB3	MCAM	NFS1
KCTD15	TMEM165	GALNT2	MCM6	NFYA
KCTD21	TMEM167A	GALNT6	MCM8	NIN
KCTD5	TMEM182	GALNT7	MCOLN2	NIPBL
KDM1B	TMEM230	GALR3	MCTP1	NIPSNAP1
KDM4B	TMEM30B	GAMT	MDH1B	NKTR
KDM6A	TMEM38B	GANAB	MDM4	NKX2-1
KDM6B	TMEM50B	GANC	ME2	NLN
KDSR	TMEM55A	GAPDH	MECOM	NLRP1
KHDRBS1	TMEM70	GAREM	MED1	NMD3
KIAA0040	TMEM98	GAS2L1	MED14	NNT
KIAA0100	TMEM9B	GATA3-AS1	MED17	NOB1
KIAA0485	TMPO	GATAD2A	MED23	NOLC1
KIAA0907	TMTC3	GBA2	MED28	NPC1
KIAA1217	TMX1	GBF1	MEGF6	NPDC1
KIF13A	TNFRSF12A	GCDH	MEGF9	NPEPPS
KIF1B	TNKS2	GDF15	METAP2	NPHP1
KIFC1	TOB1	GGA1	METTL17	NPHP3
KIFC2	TOMM22	GGA3	MFSD11	NR2C2
KLB	TOR1AIP1	GGT7	MFSD6	NR2F2
KLF13	TOR1AIP2	GH2	MGA	NR6A1
KLF3	TP53TG1	GIGYF1	MGEA5	NRIP1
KLF6	TPD52	GJC2	MIA3	NRROS
KLHL24	TPD52L1	GLB1L2	MIER1	NSD1
KLHL28	TPM1	GLE1	MIER3	NSFL1C
KLHL42	TPM4	GLG1	MINA	NT5DC2
KLHL5	TPMT	GLMP	MIR3682	NUCKS1
KMT2A	TPP2	GLTPD2	MIR99AHG	NUDCD2
KMT2C	TPR	GLUL	MIS18A	NUP214
KMT2D	TPRKB	GLYR1	MIS18BP1	NUP37
KNOP1	TRAM1	GMEB1	MLEC	NUP58
KPNA5	TRAPPC13	GMFB	MLLT10	NUP62
KPNA6	TRIM23	GML	MOCS2	NUP98
KRAS	TRIM7	GNA11	MORF4L2	OCLN
KRR1	TRIQK	GNA14	MRLN	OCRL
KRT16	TRPC1	GNAI2	MRPL30	ODF2
KRT8	TSC22D2	GNAS	MRPL4	ODF2L
L2HGDH	TSEN15	GNB1	MRPL44	ODF3B
LAMA3	TSPAN12	GNB2	MSH6	OGDH
LAMC2	TSPAN2	GNL3L	MTDH	OGT
LAMP1	TSPAN3	GNPDA1	MTMR12	ORMDL1
LAMP2	TTC14	GOLGA1	MTMR6	OSMR
LARP1	TTC32	GOLGA2	MTUS1	OTUB2
LARP1B	TTC39C	GPAT3	MXD1	OXR1
LARP4B	TUBD1	GPD1	MYEOV	P4HB
LEPROT	TUG1	GPHN	MYH10	PACSIN2
LHFP	TUSC3	GPI	MYO1B	PAFAH1B1
LHX1	TXNDC9	GPR135	MYO6	PAK2
LIAS	UBE2B	GPR63	MYSM1	PAPOLA
LILRB3	UBE2J1	GPRC5B	NA	PATL1
LIMCH1	UBE2N	GPRIN1	NAA25	PAXBP1
LIMD1	UBL7-AS1	GPS1	NADK	PCBD1
LINC00630	UBR5-AS1	GPS2	NAIP	PCBP2
LINC00645	UCHL5	GPSM2	NAMPT	PCGF1
LINC00657	UEVLD	GRASP	NAP1L4	PCIF1
LINC00963	UGGT2	GRASPOS	NASP	PCM1
LINC00997	USO1	GRIK3	NAV1	PCMTD1
LINC01126	USP28	GRIK5	NCKAP1	PCNP
LINC01360	USP44	GRIN1	NCOA1	PCNXL2
LINC01588	USP47	GRIN2C	NCOA2	PCNXL4
LINC01607	USP9Y	GRINA	NCOA3	PDE12
LINS1	VAMP3	GRIP2	NCOA6	PDE6D
LIPT1	VAMP4	GRK6	NCOR1	PDGFD
LLGL1	VMP1	GRN	NDUFS1	PDK3
LMBRD2	VTA1	GRTP1	NDUFV1	PDLIM5
LMLN	VTI1A	GSK3A	NEDD1	PDP1
LMNA	VWA5A	GSK3B	NEK2	PDP2
LMNB1	WBP11	GSPT1	NELL1	PDPK1
LMO3	WDR1	GSS	NEMF	PEA15
LMO7	WDR11-AS1	GSTA1	NF2	PES1
LNPEP	WLS	GSTCD	NFAT5	PEX13
LOC100127972	WSB1	GTDC1	NFATC3	PEX2
LOC100190986	WTAP	GTF2IP20	NFIB	PFN1
LOC100272216	XRCC4	GTF3C1	NFKBIZ	PGM2L1
LOC100505498	XRCC6BP1	GTPBP2	NFYA	PGRMC1
LOC100505549	XRN2	GTSE1	NIN	PHACTR2
LOC100506258	YRDC	GUCA1A	NIPBL	PHACTR4
LOC100506990	YWHAZ	GYPE	NIPSNAP1	PHB2
LOC100507194	ZAN	GYS1	NKTR	PHF20L1
LOC100507630	ZBTB44	H1FX	NLGN4X	PHF23
LOC100507634	ZCCHC4	H2AFX	NMD3	PHKG2
LOC100507654	ZEB1	H6PD	NOB1	PHLDA1
LOC100631378	ZFYVE16	HACD1	NOLC1	PHYKPL
LOC101927769	ZFYVE21	HACD2	NPAT	PI4KB
LOC101928727	ZIC1	HADHA	NPDC1	PICALM
LOC101929289	ZMYM6	HARS	NR1D2	PIK3C2A
LOC105373942	ZMYND11	HAUS1	NR2C2	PIK3CA
LOC105374676	ZNF146	HAVCR2	NR5A2	PIK3R1
LOC202181	ZNF160	HCFC1R1	NRIP1	PITPNA
LOC257152	ZNF195	HDAC2	NRP1	PKD2
LOC283788	ZNF204P	HDGFRP3	NRP2	PKIA
LOC284219	ZNF222	HELZ	NRXN3	PKM
LOC338620	ZNF250	HES4	NSAP11	PKP4
LOC399900	ZNF26	HGD	NSD1	PLA2G4A
LOC401261	ZNF277	HHAT	NSFL1C	PLD3
LOC642852	ZNF304	HIF3A	NSMAF	PLSCR1
LOC643711	ZNF416	HIGD2A	NT5DC2	PMAIP1
LOC645513	ZNF45	HIPK2	NUMA1	PNRC2
LOC646241	ZNF451	HIST1H2AM	NUP214	POGK
LOC646762	ZNF627	HIST1H3C	NUP54	POLM
LOC728061	ZNF770	HIVEP3	NUP62	POLR2D
LOX	ZNHIT2	HKDC1	NUP98	POLR2E
LOXL1-AS1	ZNRF2	HKR1	OCRL	POLRMT
LOXL2	ZWILCH	HLA-A	ODF2	POR
LPCAT2		HLA-B	OGDH	PPFIA1
LRIG2		HLA-C	OGT	PPIF
LRP1		HLA-DMA	OPA1	PPIG
LRP10		HLA-DOA	OR5J2	PPM1A
LRP8		HLA-E	OSBPL8	PPM1G
LRPAP1		HLA-F	OXR1	PPM1K
LRPPRC		HLA-F-AS1	PACRGL	PPP1CB
LRRC16B		HLA-G	PAFAH1B1	PPP1R10
LRRC17		HMG20B	PAK2	PPP1R11
LRRC37A2		HMGB1	PANX3	PPP2R1A
LRRC46		HMGN4	PAPD4	PPP2R2A
LRRC8A		HNF4A	PAPOLA	PPP6R2
LRRFIP1		HNRNPA2B1	PARGP1	PRCC
LSG1		HNRNPC	PATL1	PRDM2
LSM14B		HNRNPDL	PAXBP1	PRELID3B
LSM4		HNRNPH1	PCBD1	PRICKLE1
LSM8		HNRNPL	PCBP2	PRIM2
LUC7L		HNRNPUL1	PCGF1	PRKAB1
LUC7L3		HOMER2	PCGF3	PRKAB2
LUZP1		HOOK2	PCNP	PRKAG2
LYN		HOXA11-AS	PCYOX1	PRKAG2-AS1
LYPD1		HOXB13	PDCD4	PRKCB
LYPD6		HOXB9	PDK3	PRKCD
LYPLA1		HOXB-AS3	PDLIM5	PRKCI
LYRM7		HOXC12	PDP1	PRKDC
MAATS1		HPCAL1	PDPK1	PRMT1
MACROD1		HPN	PDS5B	PRMT5
MAD2L1		HPS1	PEA15	PRMT6
MAGT1		HRAS	PEX13	PRMT9
MALAT1		HRK	PEX2	PRNP
MAP1B		HS6ST1	PFN1	PRO2852
MAP1S		HSD11B2	PGAM2	PROSC
MAP2		HSP90AB1	PGD	PRPF31
MAP2K2		HSP90B1	PGM2L1	PRPF4B
MAP3K13		HSPB1	PGRMC1	PRPF6
MAP3K2		HSPC324	PHACTR2	PRPS2
MAP4		HSPG2	PHACTR4	PRR16
MAPK7		HTATIP2	PHB2	PRUNE
MAPT		HTR3A	PHF23	PSAP
MARCH2		HTRA2	PHKG2	PSAT1
MARK2		HYI	PHLDA1	PSEN1
MASTL		ID3	PHTF1	PSMB7
MBNL1		ID4	PHYKPL	PSMB8-AS1
MBNL2		IDH1-AS1	PI4KB	PSMC4
MBP		IDH3B	PIGU	PSMD1
MBTPS1		IDH3G	PIK3C2A	PSMD12
MCCC2		IFI27L1	PIK3CA	PSMD9
MCFD2		IFI27L2	PIK3R1	PTAR1
MCL1		IFITM3	PITPNA	PTCD3
MCM3AP-AS1		IFNE	PKD2L2	PTDSS1
MCM4		IFNLR1	PKHD1L1	PTGR1
MCUR1		IFT74	PKM	PTOV1
MDM4		IGF1R	PKP4	PTP4A1
MDN1		IGF2-AS	PLCB4	PTPN11
MECP2		IGF2R	PLEKHA3	PTPN3
MED1		IGFBP2	PLEKHA6	PUM1
MED13L		IGKC	PLXNA4	PXK
MED18		IKBKG	PMAIP1	QKI
MEGF8		IL15	PNPLA8	QSER1
METAP1D		IL17RB	PNRC2	R3HDM4
METTL9		IL1RAP	POGK	RAB11FIP1
MFHAS1		IL34	POLR2D	RAB1A
MFN1		IL5	POLR2E	RAB23
MGA		ILF3	POLR2J4	RAB2A
MGST1		ILK	POLR3D	RAB30-AS1
MIB2		INO80C	POR	RAB31
MICU3		INO80E	POSTN	RAB3B
MIDN		INPP5E	PPFIA1	RAB3IP
MIER3		INSR	PPHLN1	RAB5C
MIF-AS1		INTS1	PPIF	RAB8B
MIPOL1		INTS3	PPIG	RABEP1
MIS18A		IP6K2	PPM1A	RABL6
MLEC		IPO13	PPM1E	RAD21
MLLT10		IPO4	PPM1G	RAD23A
MMD		IPO9	PPM1K	RAD51-AS1
MMP14		IQGAP3	PPP1R3D	RANBP10
MORC3		IQSEC3	PPP1R7	RANBP2
MPC2		IRF2BP2	PPP2R1A	RANBP9
MPDU1		IRF6	PRCC	RANGAP1
MPHOSPH8		IRF9	PRDM12	RAP1A
MPHOSPH9		ISG15	PRDM2	RAP1GDS1
MPRIP		ISG20L2	PREPL	RAP2A
MRPL12		ITGA6	PRIM2	RAPGEF5
MRPL20		ITGAL	PRKAA2	RASEF
MRPL30		ITGB2-AS1	PRKAB2	RASSF3
MRPL38		ITGB4	PRKAG2	RBBP4
MRPL52		ITGB8	PRKCB	RBL2
MRPL57		ITPKB	PRKCD	RBM17
MRPS12		ITPR3	PRKCH	RBM25
MRPS16		ITSN1	PRKCI	RBM26
MRPS18B		IVD	PRKD3	RBM39
MRPS36		IWS1	PRMT5	RBM5
MRPS5		JADE2	PRNP	RBM6
MRTO4		JAG1	PRO2852	RBMS3
MSH6		JAG2	PROSC	RBPMS
MSI2		JAK3	PRPF31	RC3H2
MTAP		JMJD6	PRPF38B	RCN2
MTF1		JMJD8	PRPF4B	RDX
MTF2		JRKL	PRPF6	RERE
MTHFD2L		JUND	PRR16	REV1
MTPAP		JUP	PRUNE	RFC3
MTUS1		KAT6A	PSAP	RFC5
MUM1		KAT7	PSAT1	RFX7
MURC		KATNB1	PSD3	RHBDD2
MYCBP2		KAZN	PSEN1	RHEB
MYDGF		KBTBD4	PSMC4	RHOA
MYEF2		KCNB2	PSMD1	RHOBTB3
MYH10		KCND3	PSMD6	RHOQ
MYLK		KCNJ15	PSMD9	RICTOR
MYO10		KCNJ5	PTAR1	RIF1
MYO19		KCNK16	PTBP3	RIOK3
MYO1B		KCNK3	PTCD3	RIPK2
MYO6		KCTD11	PTDSS1	RLN2
MYOF		KCTD13	PTEN	RNASEH1
N4BP2L2		KCTD20	PTER	RND2
NA		KDELR1	PTGR1	RNF126
NAA15		KDM1B	PTOV1	RNF130
NAA16		KDM4B	PTP4A1	RNF168
NAA25		KDM5A	PTPN11	RNF213
NAMPT		KDM5D	PTPN3	RNF214
NAP1L4		KDM6B	PUM1	RNF24
NAPEPLD		KHSRP	PURA	RNFT2
NASP		KIAA0355	PWAR5	ROCK1
NAV1		KIAA1024	PXK	RPA1
NAV2		KIAA1147	QKI	RPAIN
NAV3		KIAA1211	QSER1	RPL14
NBEAL1		KIAA1324	R3HDM4	RPL32P3
NCBP3		KIAA1324L	RAB11FIP1	RPRD1A
NCDN		KIAA1456	RAB18	RPRD2
NCK1		KIAA1522	RAB23	RPS10
NCOA2		KIAA1652	RAB30-AS1	RPS10P7
NCOA3		KIAA1683	RAB31	RPS11
ND6		KIAA2026	RAB3B	RPS27L
NDE1		KIF13A	RAB3IP	RPS6KA2-AS1
NDRG3		KIF6	RAB5C	RRAS
NDUFB1		KIF9	RABEP1	RREB1
NEBL		KIFC2	RAD17	RRM1
NEDD1		KIR3DL3	RAD21	RRP1B
NEK2		KLF13	RAD23A	RSBN1
NEK3		KLF2	RAD23B	RSF1
NEMF		KLHDC3	RAD51-AS1	RSL1D1
NEMP1		KLHDC4	RANBP10	RTFDC1
NEXN		KLHDC8A	RANBP2	RUFY3
NF1		KLHL24	RANBP9	RUNX1T1
NFAT5		KLHL7	RANGAP1	RWDD2B
NFATC2IP		KLK3	RAP1GDS1	RXRB
NFE2		KLK7	RAP2A	RYK
NFE2L2		KLRC3	RAPGEF2	SAE1
NFIB		KMT2A	RASA2	SAMD12
NFIC		KMT2B	RASEF	SAMHD1
NFKB2		KMT2C	RASSF3	SAP18
NFKBIZ		KMT2D	RBBP4	SAR1B
NFS1		KMT2E	RBL2	SARS
NIPAL3		KPNA6	RBM15	SART3
NIPBL		KRBOX4	RBM25	SASH1
NKTR		KRCC1	RBM26	SCAF4
NKX2-1		KREMEN1	RBM39	SCAMP1
NLGN2		KRR1	RBM45	SCD
NLN		KRT38	RBM5	SCD5
NMT2		KRTAP4-6	RBM6	SCML1
NNT		L3MBTL1	RC3H2	SCOC
NOLC1		L3MBTL2	RCAN1	SCYL2
NOTCH2		LAD1	RCN2	SDCCAG3
NPC1		LAGE3	RDH10	SDHAF3
NPHP3		LAMB2	RDX	SEC22C
NR2F2		LAMTOR5-AS1	RECQL5	SEC23A
NR6A1		LARP1	REEP1	SECISBP2L
NRIP1		LDB3	RERE	SEL1L
NRROS		LETMD1	REV1	SEL1L3
NSD1		LGALS3BP	RFC3	SENP1
NTN4		LHFPL2	RFPL2	SENP2
NUCB1		LIG3	RFTN1	SEPP1
NUCKS1		LIN37	RFX3	SEPW1
NUDCD2		LINC00094	RFX7	SERBP1
NUDT4		LINC00161	RHOA	SERHL2
NUFIP1		LINC00244	RHOBTB1	SERPINB6
NUP37		LINC00294	RHOBTB3	SET
NUP58		LINC00467	RICTOR	SETD8
NUP62		LINC00475	RIF1	SETDB1
NUSAP1		LINC00476	RIMKLA	SF1
NXPE3		LINC00608	RIPK1	SF3A1
OCLN		LINC00630	RNASEH1	SF3B1
ODF2L		LINC00658	RNASEL	SFPQ
ODF3B		LINC00663	RNF126	SHMT2
OLMALINC		LINC00685	RNF13	SIGMAR1
OPA3		LINC00845	RNF130	SIKE1
OR51E1		LINC00886	RNF146	SKI
ORC4		LINC00887	RNF168	SKIL
ORMDL1		LINC00938	RNF217	SLAIN2
ORMDL3		LINC00996	RNF217-AS1	SLC11A2
OSBPL10		LINC01000	RNF24	SLC22A3
OSBPL3		LINC01007	RNGTT	SLC24A1
OSMR		LINC01023	RNPC3	SLC25A1
OTUB2		LINC01089	RORA	SLC25A16
OXR1		LINC01289	RORB	SLC25A36
P4HB		LINC01296	RPA1	SLC25A37
PACSIN2		LINC01351	RPL32P3	SLC2A10
PAK1		LINC01532	RPL39L	SLC2A4RG
PAK6		LINC01533	RPRD1A	SLC30A5
PALLD		LINC01607	RPS10P7	SLC35E1
PAPOLA		LITAF	RPS11	SLC35F2
PARD6B		LMAN1	RPS6KB1	SLC36A4
PAXIP1-AS2		LMCD1	RRAS	SLC38A1
PBX2		LMNA	RREB1	SLC38A10
PCAT7		LOC100126784	RRM1	SLC39A6
PCBP2		LOC100128554	RRP1B	SLC39A8
PCDHB1		LOC100129603	RSBN1	SLC41A2
PCLO		LOC100130219	RSF1	SLC4A4
PCM1		LOC100130370	RSL1D1	SLC5A3
PCMTD1		LOC100131541	RSRC2	SMA4
PCNX		LOC100132207	RUFY1	SMARCA4
PCNXL2		LOC100190986	RUNX1T1	SMARCC1
PCNXL4		LOC100272216	RYBP	SMC3
PDAP1		LOC100288152	RYK	SMG1P5
PDCD1		LOC100505797	SAE1	SMG7
PDE3B		LOC100506047	SAR1B	SMPDL3B
PDGFD		LOC100506100	SARS	SMURF2
PDK3		LOC100506114	SART3	SNAPC3
PDLIM5		LOC100506374	SCAF4	SNTB2
PDP1		LOC100506530	SCAMP1	SNX1
PDP2		LOC100506639	SCARB2	SNX13
PDPK1		LOC100506922	SCD	SNX17
PDRG1		LOC100507351	SCD5	SNX25
PDXK		LOC100507389	SCML1	SNX27
PES1		LOC100507642	SCYL2	SNX9
PEX26		LOC100996506	SDCCAG3	SON
PGK1		LOC100996756	SDCCAG8	SORD
PHACTR2		LOC101926997	SEC22C	SOS2
PHAX		LOC101927479	SEC23A	SOX12
PHBP19		LOC101928167	SEC63	SOX4
PHF20		LOC101928207	SECISBP2L	SP1
PHF20L1		LOC101928487	SEL1L	SPAG8
PHF23		LOC101928762	SEL1L3	SPATA17
PHF3		LOC101928841	SENP2	SPATA20
PHF5A		LOC101929112	SENP7	SPATS2
PHLDA1		LOC101929125	SERBP1	SPEN
PHYKPL		LOC101929243	SERHL2	SPIN3
PIAS4		LOC101929378	SERINC3	SPINK13
PICALM		LOC101929964	SERPINB6	SPOP
PIK3R1		LOC102723661	SESN3	SPTAN1
PIP4K2A		LOC105369553	SETD8	SPTLC1
PIP5K1A		LOC105373150	SETDB1	SQLE
PIPOX		LOC105377468	SF1	SREK1
PKD2		LOC105378130	SF3A1	SREK1IP1
PKN2		LOC149703	SF3B1	SRGAP1
PKP4		LOC155060	SFPQ	SRPR
PLA2G4A		LOC171391	SFRP4	SRRM1
PLAU		LOC221122	SH3TC2	SRRM2
PLD2		LOC283357	SHANK2	SRRT
PLD3		LOC283454	SHB	SRSF1
PLEKHA2		LOC283737	SHMT2	SRSF10
PLEKHA8		LOC388882	SIGMAR1	SRSF12
PLEKHB2		LOC389906	SIKE1	SRSF3
PLSCR1		LOC440792	SKI	SRSF4
PMAIP1		LOC441601	SLAIN2	SRSF6
PMVK		LOC619427	SLC11A2	SS18
PNISR		LOC645321	SLC16A7	SSBP2
PNRC2		LOC646903	SLC1A2	SSH1
POC1B		LOC728353	SLC22A24	SSR3
PODNL1		LOC728868	SLC22A3	SSRP1
POGK		LOC729732	SLC24A1	SSX2IP
POLI		LOC81691	SLC25A1	ST3GAL1
POLM		LONP1	SLC25A16	STAT1
POLR1B		LPGAT1	SLC25A36	STAT3
POLR2E		LRCH3	SLC25A37	STIP1
POLRMT		LRP10	SLC30A5	STK16
PORCN		LRP5	SLC30A7	STK32B
PPAP2B		LRRC31	SLC35E1	STRAP
PPFIA1		LRRC37A4P	SLC38A1	STRN3
PPIF		LRRC41	SLC39A6	STX16
PPIG		LRRC45	SLC39A8	STYX
PPM1A		LRRC47	SLC44A3	SUGT1
PPP1CB		LRRC4C	SLC47A2	SUV39H2
PPP1R10		LRRC58	SLC4A4	SZRD1
PPP1R11		LRRC8C	SLC4A7	TACC3
PPP1R3B		LRRFIP1	SLC5A12	TADA2A
PPP1R9A		LSAMP	SLC5A3	TADA3
PPP2R2A		LSM5	SLC7A1	TAF15
PPP2R3C		LSM6	SLFN12	TAF4B
PPP2R5E		LTBP3	SMARCA4	TAOK1
PPP3R1		LTBP4	SMARCC1	TBL1XR1
PPP6R2		LTBR	SMC3	TBRG4
PPP6R3		LUC7L3	SMC5	TBX3
PPTC7		LY6E	SMIM14	TCEA2
PPWD1		LYN	SMPDL3B	TCERG1
PRCC		MAATS1	SMURF2	TCF7L2
PRELID3B		MACF1	SNAPC3	TECR
PRICKLE1		MACROD1	SNRPA1	TERF2
PRIM2		MAD1L1	SNTB2	TGFB1
PRKAB1		MAF1	SNX1	TGIF1
PRKAG2-AS1		MAGI1	SNX13	TGOLN2
PRKAR2A		MAGOH2P	SNX17	THEM4
PRKCI		MALAT1	SNX24	THUMPD3
PRKD2		MAML3	SNX25	TIMM22
PRKDC		MAN2C1	SNX27	TK1
PRMT1		MAP1LC3B	SNX9	TKT
PRMT6		MAP2K2	SON	TLDC1
PRMT9		MAP2K5	SORBS2	TLE2
PRNP		MAP2K7	SORD	TLK1
PRO2214		MAP3K2	SOS2	TM2D1
PRO2852		MAP4K2	SOX12	TM9SF4
PROSC		MAP7	SPAG17	TMA16
PRPF31		MAP7D1	SPAG9	TMCC1
PRPF4		MAPK1IP1L	SPATA17	TMED2
PRPF6		MAPK7	SPATS2	TMED8
PRPS1		MAPK8	SPEN	TMEM144
PRR12		MAPK8IP3	SPIN1	TMEM161B
PRRC2C		MAPKAPK2	SPIN3	TMEM165
PSAP		MAPRE3	SPINK13	TMEM167A
PSAT1		MAPT	SPIRE1	TMEM230
PSEN1		MARCH6	SPPL2A	TMEM260
PSENEN		MAS1L	SPTLC1	TMEM33
PSMA3-AS1		MAST2	SPTLC2	TMEM55A
PSMB7		MAST3	SPTY2D1	TMEM70
PSMB8-AS1		MAST4	SQLE	TMEM9B
PSMC3		MAU2	SREK1	TMPO
PSMD11		MAVS	SRP72	TMX1
PSMD12		MBD6	SRR	TNFRSF10A
PSMD13		MCF2L	SRSF1	TNFRSF12A
PSMD6-AS2		MCM3AP-AS1	SRSF10	TNKS2
PSME4		MCM7	SRSF3	TNPO1
PSPC1		MCRS1	SRSF4	TNPO2
PTAR1		MED12	SRSF7	TNPO3
PTCH1		MED16	SS18	TNRC6B
PTCRA		MED19	SSRP1	TNS1
PTGR1		MEF2C-AS1	SSX2IP	TOMM22
PTP4A2		MEG3	ST3GAL1	TOR1AIP1
PTPN11		MEGF6	STAT3	TOR1AIP2
PTPN14		MEN1	STIP1	TOX4
PTRF		METTL14	STK16	TP53TG1
PXK		METTL17	STK17B	TPD52
PYGO2		METTL21A	STK26	TPM3
PYROXD1		MEX3D	STK33	TPR
QKI		MFAP3	STK4	TRA2A
QTRT1		MFI2-AS1	STRAP	TRAK1
RAB11FIP1		MFSD3	STRBP	TRAPPC10
RAB11FIP3		MFSD6	STRN3	TRAPPC13
RAB12		MGAT4B	STX16	TRIM16
RAB14		MGC40069	STYX	TRIM23
RAB27A		MIA3	SZRD1	TRIM4
RAB2A		MICALL1	TAB2	TRIM41
RAB30-AS1		MICU1	TACC3	TRIM42
RAB31		MID1	TADA3	TRIM52
RAB33B		MID1IP1	TAF15	TRIM66
RAB3B		MIEN1	TAF2	TRIO
RAB8B		MIER1	TAF4B	TRIQK
RABEP1		MIF4GD	TAOK1	TRMT2B
RABL6		MIF-AS1	TAPT1	TRPC1
RAC1		MIIP	TARS	TRRAP
RAD1		MIPOL1	TBC1D10A	TSHZ1
RAD21		MIR17HG	TBC1D12	TSPAN12
RAD23A		MIS18A	TBC1D20	TSPAN2
RAD51-AS1		MKI67	TBL1X	TSTA3
RALBP1		MKNK2	TBL1XR1	TTC14
RALGAPA1		MLEC	TBRG4	TTC37
RANBP1		MLF1	TBX3	TUBD1
RANBP10		MLF2	TCEA2	TUFM
RANBP2		MLLT10	TCEB3	TUG1
RANGAP1		MLLT4	TCERG1	TUSC3
RAP1A		MLLT6	TERF2	TXLNG
RAP1GDS1		MLXIP	TEX36	TXN2
RAP2A		MMP11	TFAP2C	TXNDC9
RAP2C		MMP16	TFCP2L1	U2SURP
RAPGEF5		MMP24-AS1	TFRC	UBA1
RAPGEF6		MOB3A	TGOLN2	UBA6
RASAL2		MOCS1	TH2LCRR	UBAP2L
RASAL3		MOCS2	THEM4	UBE2D3
RASEF		MORC2	THEMIS	UBE2J1
RASSF6		MPL	TIMM22	UBE2M
RBBP4		MPRIP	TIMM8A	UBE2S
RBFOX2		MPV17	TIPRL	UBE2Z
RBL2		MRO	TJP2	UBE4B
RBM14		MRPL2	TK1	UBL7-AS1
RBM17		MRPL35	TKT	UBN2
RBM25		MRPL37	TLE2	UBR5-AS1
RBM33		MRPL38	TLK1	UBXN7
RBM39		MRPL4	TLK2	UEVLD
RBM6		MRPL41	TM9SF1	UFL1
RBMS3		MRPL49	TM9SF4	UGCG
RBPMS		MRPL52	TMCC1	UGGT2
RC3H1		MRPL54	TMCO3	UGP2
RC3H2		MRPS15	TMED2	UGT8
RCCD1		MRPS18B	TMED8	UHMK1
RDH11		MRPS22	TMEM106B	ULK4
RDX		MRPS5	TMEM144	UQCRC1
REV1		MRTO4	TMEM150A	USO1
RFC5		MS4A1	TMEM161B	USP1
RFXAP		MSC	TMEM165	USP21
RGS14		MSI2	TMEM168	USP28
RHBDD2		MTA1	TMEM260	USP34
RHEB		MTA2	TMEM30A	USP36
RHOA		MTDH	TMEM33	USP38
RHOBTB3		MTERF1	TMEM47	USP40
RHOC		MTFR2	TMEM64	USP42
RHOF		MTHFR	TMPO	USP47
RHOQ		MTMR6	TMTC2	USP48
RICTOR		MTMR9LP	TMTC4	USP9Y
RIF1		MUC1	TMX1	UTP23
RIOK3		MUC20	TNFRSF10A	VAMP3
RIPK2		MUC3A	TNKS2	VAPA
RLN2		MUC3B	TNPO1	VEGFA
RNASEH1		MVK	TNPO3	VGLL4
RND2		MXRA7	TNRC6B	VMP1
RNF125		MXRA8	TNS1	VPS13B
RNF213		MYBBP1A	TOLLIP	VPS13C
RNF214		MYEOV	TPR	VPS35
RNF26		MYH10	TRA2A	VRK3
RNFT2		MYH7B	TRAM2	VTA1
ROCK1		MYH9	TRAPPC10	VTI1A
ROR1		MYL12A	TRAPPC13	VWA5A
RPAIN		MYO1A	TRIB1	VWA9
RPGRIP1L		MYO1C	TRIM16	WAC
RPL14		MYO6	TRIM23	WASF2
RPL27A		MZB1	TRIM4	WBP11
RPL37A		MZF1	TRIM42	WBP2
RPL38		N4BP2	TRIM52	WBSCR16
RPP30		N4BP2L1	TRIM66	WDFY1
RPRD2		NA	TRIO	WDFY2
RPS10		NAA10	TRPC1	WDR1
RPS10P7		NAA25	TRPC4	WDR35
RPS11		NABP2	TRRAP	WDR4
RPS27		NACA	TRUB1	WEE1
RPS27L		NACC1	TSHZ1	WFS1
RPS2P45		NADK	TSTA3	WLS
RPS6KA2-AS1		NAGLU	TTC17	WNK1
RRBP1		NAMPT	TTC37	WRAP53
RREB1		NANOG	TTLL5	WRAP73
RRM1		NAPA	TUBD1	WSB1
RSF1		NAPSA	TUBGCP3	WTAP
RSL1D1		NASP	TUBGCP5	WWC1
RSPRY1		NAT16	TUFM	XIAP
RSRC1		NAV1	TUG1	XRN2
RTFDC1		NBR2	TWF1	YBX1
RTN4		NCAPD2	TXLNG	YIF1B
RUFY3		NCAPG	U2SURP	YPEL2
RUNDC3A-AS1		NCOA1	UBA1	YTHDC2
RUNX1-IT1		NCOA3	UBA6	YWHAH
RUNX1T1		NCOR1	UBAP2L	YWHAZ
RUSC1-AS1		NCOR2	UBE2D3	YY1
RWDD2B		NCS1	UBE2I	ZBED1
S1PR3		NCSTN	UBE2J1	ZBTB38
SAE1		ND2	UBE2W	ZBTB43
SAFB		ND4	UBE2Z	ZC3H7A
SALL4		NDFIP1	UBE4B	ZCCHC2
SAMD12		NDOR1	UBL7-AS1	ZCCHC4
SAMD4B		NDRG3	UBN2	ZCCHC6
SAMHD1		NDST4	UBXN7	ZCCHC7
SAP30		NDUFAF4	UFL1	ZEB1
SART3		NDUFV1	UGCG	ZFP36L1
SASH1		NEK10	UGP2	ZFP90
SAV1		NENF	UGT8	ZFYVE1
SBF2		NEU1	UHMK1	ZIC1
SBNO1		NEUROD2	ULK4	ZKSCAN1
SCAF4		NF1	UNC80	ZMAT3
SCAMP1		NFAM1	UQCRC1	ZMYM2
SCAND1		NFASC	USO1	ZMYM6
SCAND2P		NFATC1	USP1	ZMYND11
SCD5		NFE2L3	USP21	ZNF106
SCFD1		NFIC	USP28	ZNF146
SCML1		NFIX	USP33	ZNF148
SCOC		NFKBIZ	USP34	ZNF195
SCRN3		NFS1	USP36	ZNF204P
SCUBE3		NFX1	USP38	ZNF207
SDCCAG3		NFYA	USP40	ZNF26
SDHAF3		NFYC	USP42	ZNF266
SDHC		NGFR	USP47	ZNF275
SEC14L1		NIN	USP48	ZNF3
SEC14L5		NINJ1	USP9Y	ZNF385B
SEC23A		NIPAL2	UTP23	ZNF398
SEC24B-AS1		NIPBL	VAMP3	ZNF416
SEL1L		NIPSNAP1	VAPA	ZNF442
SEMA3C		NKX2-1	VASH2	ZNF45
SENP1		NLN	VDAC1	ZNF573
SEPP1		NLRP1	VEGFA	ZNF609
SEPW1		NLRP13	VIP	ZNF654
SERBP1		NMNAT1	VIPAS39	ZNF770
SET		NOB1	VMO1	ZNF776
SETD8		NOC2L	VNN3	ZNHIT2
SF3B1		NOL7	VPS13B	ZWILCH
SFSWAP		NOTCH3	VPS13C	ZYG11B
SFXN3		NPDC1	VPS35
SGOL1		NPEPPS	VPS53
SH3BGRL		NPHP1	VRK3
SH3BP2		NPHP3	VTA1
SIK3		NPIPA1	VTI1A
SIKE1		NPNT	VWA9
SIRT5		NR2C1	VWC2
SKI		NR2C2	WAC
SKIL		NR2F2	WASF2
SLAIN2		NR6A1	WDFY1
SLC12A8		NRG1	WDR35
SLC20A1		NRG2	WDR4
SLC22A3		NRGN	WDR89
SLC24A1		NRROS	WEE1
SLC25A13		NSD1	WFS1
SLC25A16		NSDHL	WIPI2
SLC25A36		NSFL1C	WLS
SLC25A37		NSMCE4A	WRAP53
SLC25A45		NSUN5P1	WRAP73
SLC26A2		NT5DC1	WSB1
SLC2A10		NT5DC2	WWC1
SLC2A4RG		NUCKS1	XIAP
SLC35A3		NUDCD2	XPNPEP1
SLC35D1		NUP188	XRCC5
SLC35E1		NUP210	XRN2
SLC35F2		NUP214	YBX1
SLC38A1		NUP62	YIF1B
SLC38A10		NUP98	YME1L1
SLC39A6		NXF1	YPEL2
SLC39A7		NYAP1	YTHDC2
SLC41A2		NYX	YWHAH
SLC4A4		OAS3	YWHAZ
SLC5A3		OCLN	ZBED1
SLC9B2		OCRL	ZBTB10
SLF2		ODF2	ZBTB14
SLFN13		ODF3B	ZBTB20
SMA4		ODF4	ZBTB38
SMARCA2		OGDH	ZBTB43
SMARCC1		OGFOD1	ZC3H7A
SMC1A		OGFOD3	ZCCHC2
SMC3		OMA1	ZCCHC4
SMCHD1		OPHN1	ZCCHC6
SMG1P5		ORAI1	ZCCHC7
SMG7		ORAOV1	ZDHHC21
SMIM10L1		OSGIN1	ZFP28
SMURF2		OSTM1-AS1	ZFP82
SNAP23		OXA1L	ZFP90
SNAP29		P2RX5	ZFR
SNHG4		P4HB	ZFYVE1
SNRPE		PABPC1L	ZKSCAN1
SNTB2		PABPN1	ZKSCAN5
SNX13		PACSIN2	ZMAT3
SNX27		PAFAH1B1	ZMYM2
SNX8		PAK2	ZMYM6
SNX9		PAK4	ZMYND11
SOBP		PANK4	ZNF106
SOD2		PAOX	ZNF12
SON		PAPLN	ZNF124
SORBS1		PAPOLA	ZNF146
SORD		PARP15	ZNF148
SOS2		PARVB	ZNF175
SOX4		PATL1	ZNF182
SOX6		PATZ1	ZNF195
SP1		PAX1	ZNF207
SP110		PAXBP1	ZNF227
SPAG8		PCBD1	ZNF236
SPATA20		PCBP1	ZNF254
SPATA21		PCBP1-AS1	ZNF266
SPATA33		PCBP2	ZNF275
SPATA5L1		PCDH9	ZNF382
SPATS2		PCDHA10	ZNF385B
SPDYE2		PCDHAC1	ZNF398
SPEN		PCF11	ZNF407
SPIN3		PCGF1	ZNF414
SPINK4		PCIF1	ZNF416
SPOP		PCM1	ZNF429
SPRED2		PCNXL2	ZNF430
SPRY1		PCNXL3	ZNF442
SPRYD7		PCNXL4	ZNF45
SPTAN1		PCOLCE	ZNF512
SPTBN1		PCP2	ZNF547
SPTLC1		PCSK6	ZNF567
SQLE		PCYT2	ZNF573
SREK1		PDCL	ZNF589
SREK1IP1		PDE12	ZNF596
SRGAP1		PDE1B	ZNF652
SRGAP2		PDE4A	ZNF654
SRGAP3		PDE6D	ZNF678
SRPRB		PDE9A	ZNF704
SRRM1		PDGFB	ZNF778
SRRM2		PDIA2	ZNF785
SRRM3		PDPN	ZNF79
SRRT		PDSS1	ZNF800
SRSF1		PEA15	ZRANB1
SRSF10		PES1	ZSCAN21
SRSF12		PEX11B	ZWILCH
SRSF3		PFKFB4	ZYG11B
SRSF4		PFKL
SRSF6		PFN1
SRSF8		PGLS
SSBP2		PGM2L1
SSH1		PGPEP1
SSR1		PGRMC2
SSR3		PHACTR1
SSRP1		PHACTR4
ST8SIA4		PHB2
STAG2		PHF2
STAT2		PHF20L1
STAT3		PHF8
STIM1		PHGDH
STIP1		PHKA2
STK16		PHKG2
STK24		PHYKPL
STK32B		PI4K2A
STK38		PI4KA
STPG1		PI4KB
STRAP		PIAS1
STRIP2		PIDD1
STRN3		PIEZO1
STX16		PIGK
STX17		PIGL
STXBP4		PIGQ
SUGT1		PIK3C2A
SULF1		PIK3CA
SUN1		PIK3R1
SURF1		PIK3R2
SUV39H2		PITPNA
SUZ12		PITPNA-AS1
SUZ12P1		PITPNM1
SYMPK		PITX1
SYNCRIP		PKD2
SZRD1		PKIA
TAAR2		PKIG
TACC1		PKM
TADA2A		PKP4
TAF1		PLA2G2D
TAF15		PLA2G4A
TAGLN2		PLAGL2
TAL1		PLD3
TANC1		PLEKHA1
TANC2		PLEKHB1
TAOK1		PLEKHG6
TBCD		PLEKHH1
TBCK		PLEKHH3
TBK1		PLOD3
TBL1XR1		PLRG1
TBRG1		PLS1
TBXA2R		PLXDC2
TCAF1		PLXNB2
TCEA1		PMEPA1
TCERG1		PMF1
TCF15		PNKD
TCF25		PNPLA6
TCF7L2		PODXL2
TDG		POGK
TECR		POGZ
TES		POLD2
TEX15		POLDIP3
TFDP1		POLE
TGFB1		POLM
TGIF1		POLR1D
TGOLN2		POLR2D
THAP2		POLR2E
THAP6		POLR2K
THOC7		POLRMT
THRA		POMZP3
THRAP3		POR
THSD7A		POTEKP
THUMPD3		POU2F1
TIMM44		PP14571
TJP3		PPARGC1B
TK1		PPFIA1
TLDC1		PPIF
TLK1		PPIG
TM2D1		PPM1G
TMA16		PPM1K
TMED2		PPM1M
TMED3		PPME1
TMED4		PPP1CA
TMED8		PPP1R10
TMEM106C		PPP1R11
TMEM116		PPP1R12A
TMEM133		PPP1R12C
TMEM151B		PPP1R14B
TMEM167A		PPP1R16A
TMEM185B		PPP2R1A
TMEM192		PPP2R2A
TMEM230		PPP2R4
TMEM255B		PPP4C
TMEM33		PPP6C
TMEM43		PPP6R2
TMEM55A		PQLC2
TMEM63A		PRAF2
TMEM67		PRCC
TMEM70		PRDM2
TMEM9		PRDM6
TMEM97		PRDX5
TMEM9B		PRELID1
TMPO		PRIM2
TMX1		PRKAB1
TNFRSF10A		PRKAB2
TNFRSF12A		PRKCB
TNFRSF14		PRKCD
TNIK		PRKCI
TNPO1		PRKDC
TNPO2		PRMT1
TNPO3		PRMT5
TNRC6B		PRO2852
TNS3		PROS1
TOB2		PROSC
TOP1		PRPF3
TOP2A		PRPF31
TOR1AIP1		PRPF4B
TOR1AIP2		PRPF6
TOX4		PRPF8
TP53BP1		PRPS2
TP53TG1		PRR14
TPD52		PRR16
TPM3		PRRC2A
TPP1		PRRC2B
TPR		PRUNE
TRA2A		PSAP
TRA2B		PSAT1
TRAF7		PSD
TRAK1		PSEN1
TRAPPC10		PSMB7
TRAPPC13		PSMB8-AS1
TRERF1		PSMC4
TRIM11		PSMD1
TRIM13		PSMD4
TRIM14		PSMD7
TRIM17		PSMD9
TRIM24		PSME3
TRIM25		PSMF1
TRIM33		PSORS1C2
TRIM41		PTAFR
TRIM5		PTCD3
TRIO		PTCH2
TRIQK		PTDSS1
TRMT13		PTGR1
TRMT2B		PTOV1
TROVE2		PTPN1
TRRAP		PTPN11
TSPAN12		PTPN18
TSPAN2		PTPN2
TSPAN4		PTPN21
TSPAN5		PTPN22
TTBK2		PTPN3
TTC14		PTPRF
TTC37		PTRHD1
TTC8		PUM1
TTPAL		PWWP2B
TUBD1		PXK
TUBGCP4		PXMP4
TUG1		PYGB
TUSC3		QSER1
TXN		R3HDM2
TXN2		R3HDM4
TYW5		RAB11FIP1
U2AF1		RAB1A
U2AF2		RAB23
U2SURP		RAB25
UBA6		RAB27B
UBE2D3		RAB29
UBE2G2		RAB2A
UBE2M		RAB30-AS1
UBE2Q1		RAB3B
UBE2S		RAB3IP
UBE2V2		RAB5C
UBE2Z		RAB7A
UBL7-AS1		RAB8A
UBN1		RABL6
UBR5-AS1		RAD23A
UBTF		RALGDS
UBXN4		RALY
UBXN6		RAMP2
UBXN7		RANBP10
UCN2		RANBP2
UEVLD		RANBP9
UFL1		RANGAP1
UGCG		RAP1A
UGT8		RAPGEF1
UHMK1		RAPGEF5
UNC93B1		RASEF
UNKL		RASSF3
USP10		RASSF4
USP14		RBM15B
USP16		RBM17
USP22		RBM18
USP31		RBM23
USP32P2		RBM39
USP34		RBM42
USP40		RBM4B
USP46		RBM5
USP47		RBM6
USP9X		RBM8A
UTP20		RBPMS
UTP23		RDH13
UTY		RDX
VANGL1		REL
VEZF1		RELA
VEZT		RELB
VGLL4		RERE
VHL		REV1
VMP1		RGMB
VPREB3		RGPD5
VPS13A		RGS6
VPS13B		RGS8
VPS13C		RHBDD2
VPS35		RHEB
VWA1		RHOA
VWA5A		RHOB
VWA8		RHOBTB3
VWA9		RHOD
WAC		RIN3
WASF2		RIPPLY3
WASL		RIT1
WBP11		RNASEH2C
WBP2		RNASET2
WBSCR16		RND2
WDFY2		RNF123
WDR1		RNF126
WDR11		RNF128
WDR17		RNF130
WDR4		RNF138
WEE1		RNF144A
WHSC1		RNF168
WHSC1L1		RNF185
WIPF1		RNF187
WIPF2		RNF19B
WLS		RNF213
WNK1		RNF214
WNK3		RNF24
WSB1		RNF32
WTAP		RNF41
WWC1		RNF44
WWTR1		RNFT2
XIAP		RNH1
XPO1		RNPEP
XPO7		RNPS1
XRN2		RORA-AS1
YIF1B		RPA1
YIPF5		RPAIN
YLPM1		RPL14
YOD1		RPL32P3
YTHDC2		RPN2
YWHAB		RPP25
YWHAZ		RPRD2
YY1		RPS10P7
ZBED1		RPS21
ZBED5		RPS6KA1
ZBED6		RPS6KA2
ZBTB1		RPS6KB2
ZBTB38		RPS9
ZBTB40		RPUSD3
ZBTB43		RRAS
ZBTB6		RREB1
ZC3H14		RRP1B
ZC3H7A		RSBN1
ZC3H7B		RSL1D1
ZCCHC2		RTFDC1
ZCCHC24		RTN3
ZCCHC6		RUFY3
ZCCHC7		RUNX2
ZDHHC2		RUSC1
ZEB1		RXRB
ZER1		S100A11
ZFAND3		SAC3D1
ZFAND6		SAE1
ZFP3		SAMD1
ZFP30		SAMD14
ZFP36L1		SAP18
ZFP41		SAP30L
ZFP69		SAPCD2
ZFY		SARDH
ZIC1		SARS
ZKSCAN1		SASH1
ZMAT3		SATB1
ZMYM2		SBF1
ZMYM5		SBK1
ZNF106		SBSN
ZNF146		SCAMP3
ZNF148		SCARB1
ZNF204P		SCD
ZNF207		SCG5
ZNF26		SCGN
ZNF264		SCLY
ZNF281		SCYL2
ZNF295-AS1		SDC3
ZNF3		SDCCAG3
ZNF37BP		SDF4
ZNF391		SEC23A
ZNF395		SEC24C
ZNF397		SEC61A1
ZNF398		SEC61A2
ZNF416		SEC62
ZNF431		SECISBP2L
ZNF440		SEL1L3
ZNF442		SELENBP1
ZNF462		SELM
ZNF493		SELO
ZNF514		SENP1
ZNF518B		SENP2
ZNF524		SENP3
ZNF573		SEPN1
ZNF599		SEPP1
ZNF609		SEPW1
ZNF618		SERHL2
ZNF621		SERINC2
ZNF628		SERPINB6
ZNF641		SETD2
ZNF644		SETD5
ZNF654		SETD8
ZNF655		SETDB1
ZNF677		SETMAR
ZNF70		SEZ6L2
ZNF709		SF1
ZNF71		SF3A1
ZNF721		SF3B3
ZNF738		SFPQ
ZNF75D		SFRP2
ZNF776		SFRP5
ZNF791		SFTPC
ZNF814		SFXN2
ZNF830		SGPL1
ZNF843		SGSH
ZNHIT2		SGSM2
ZSCAN22		SH2B3
ZYG11B		SH2D3A
		SH3BGRL3
		SH3GLB2
		SHISA5
		SHMT1
		SHMT2
		SIAH2
		SIGIRR
		SIGLEC17P
		SIGMAR1
		SIN3A
		SIRT2
		SIRT3
		SIX1
		SKAP2
		SKIV2L2
		SKP2
		SLAIN2
		SLC11A1
		SLC11A2
		SLC12A6
		SLC18A1
		SLC1A4
		SLC1A5
		SLC22A7
		SLC25A1
		SLC25A16
		SLC25A22
		SLC25A25
		SLC25A27
		SLC25A28
		SLC25A37
		SLC25A39
		SLC25A51
		SLC27A4
		SLC29A2
		SLC2A4RG
		SLC30A2
		SLC35E1
		SLC35E2B
		SLC36A4
		SLC38A1
		SLC38A10
		SLC39A4
		SLC3A2
		SLC44A2
		SLC45A3
		SLC4A2
		SLC4A4
		SLC6A19
		SLC6A8
		SLC7A10
		SLC7A5
		SLC9A1
		SLCO2B1
		SLIT1
		SLK
		SLX4IP
		SMA4
		SMARCA4
		SMARCC2
		SMC3
		SMG1P5
		SMG7
		SMPD3
		SMPDL3B
		SMTN
		SMURF1
		SNAI3-AS1
		SNAPC3
		SNAPC4
		SNHG17
		SNRNP200
		SNRNP70
		SNRPA
		SNRPB
		SNRPD1
		SNX1
		SNX17
		SNX25
		SNX27
		SNX9
		SOGA1
		SON
		SORD
		SOX12
		SOX13
		SOX17
		SOX4
		SP1
		SP3
		SPAG8
		SPATA17
		SPATA20
		SPATC1L
		SPATS2
		SPC25
		SPEN
		SPINK13
		SPINT1
		SPN
		SPOP
		SPRY3
		SPSB3
		SPTAN1
		SPTBN4
		SREBF1
		SREBF2
		SREK1IP1
		SRGAP1
		SRM
		SRPR
		SRRM1
		SRRM2
		SRRT
		SRSF4
		SRSF6
		SSBP3
		SSC4D
		SSH1
		SSH3
		SSRP1
		SSU72
		SSUH2
		SSX2IP
		ST13
		ST3GAL1
		ST6GALNAC4
		STAMBP
		STARD10
		STAT1
		STAT3
		STAU1
		STAU2
		STC1
		STIP1
		STK35
		STMN4
		STOML3
		STOX1
		STRADA
		STUB1
		STX10
		STX12
		STX16
		SUGP2
		SUGT1
		SULF2
		SUPT4H1
		SUPT6H
		SUV39H1
		SUV39H2
		SWI5
		SYNGR2
		SYNJ2
		SYNRG
		SYTL1
		SZRD1
		TACC3
		TADA3
		TAF10
		TAF11
		TAF15
		TAF4
		TAMM41
		TAPBP
		TBC1D2B
		TBC1D5
		TBL1XR1
		TBL3
		TBRG4
		TBX1
		TBX3
		TBX5-AS1
		TCEA2
		TCEAL3
		TCF7L2
		TCIRG1
		TEAD4
		TECR
		TEFM
		TERF2
		TFAP4
		TFPI
		TFR2
		TGFB1
		TGIF1
		TGOLN2
		THBS1
		THEM4
		THNSL1
		TIMM22
		TIMM50
		TK1
		TKFC
		TKT
		TLDC1
		TLE2
		TLE3
		TLK1
		TLR3
		TLR8
		TM7SF2
		TM9SF4
		TMC3-AS1
		TMC6
		TMCC1
		TMED2
		TMED8
		TMEM108
		TMEM115
		TMEM132A
		TMEM132E
		TMEM134
		TMEM144
		TMEM161B
		TMEM161B-AS1
		TMEM165
		TMEM171
		TMEM185A
		TMEM201
		TMEM222
		TMEM241
		TMEM253
		TMEM260
		TMEM33
		TMEM39B
		TMEM52
		TMEM54
		TMEM59L
		TMEM61
		TMOD3
		TNFRSF10A
		TNFRSF10C
		TNFRSF25
		TNKS2
		TNNI2
		TNPO2
		TNPO3
		TNRC6A
		TNRC6B
		TNS1
		TNS2
		TOM1L2
		TOMM22
		TONSL
		TOX4
		TP53
		TPCN1
		TPGS1
		TPI1
		TPM3
		TPR
		TPRA1
		TPX2
		TRA2A
		TRAIP
		TRAK1
		TRIM16
		TRIM28
		TRIM4
		TRIM41
		TRIM42
		TRIM52
		TRIM66
		TRMT2B
		TRMT44
		TRO
		TRPM6
		TSC2
		TSHZ1
		TSPAN14
		TSR3
		TSSK6
		TSTA3
		TTC23
		TTC25
		TTC6
		TTC7B
		TTLL4
		TTLL9
		TTTY14
		TUBB
		TUBB3
		TUBB4B
		TUBG2
		TUBGCP6
		TUFM
		TUG1
		TXLNA
		TXLNG
		TXN2
		TXNDC9
		TXNIP
		TYK2
		TYSND1
		U2SURP
		UAP1L1
		UBA1
		UBAC1
		UBAP2L
		UBE2D3
		UBE2M
		UBE2O
		UBE2R2
		UBE2S
		UBE2Z
		UBE3B
		UBE4B
		UBN2
		UBR4
		UCKL1
		UFL1
		UGCG
		UGGT2
		UGP2
		UHMK1
		ULK1
		ULK4
[truncated: 137 more rows]

## Sheet: Supplementary Table S2
DU145	LNCaP	PC-3	LAPC4	22RVI	SELECTED TRANSCRIPTS		mRNA transcripts bound to AGO2 on conserved 6mer miR-183-5p seed_ AGO2-PAR-CLIP (interacting in at least 3 conditions)
AGO1	SEPT2	AGO1	AGO1	AGO1	AGO2
AGO2	AARS	AGO2	AGO2	AGO2	AAR2
SEPT2	ABCA2	SEPT2	SEPT2	SEPT2	ABCA3
SEPT9	ABCA3	AGO4	AGO3	AGO3	ABCD1
AARS	ABCD1	SEPT6	SEPT7	AGO4	ABCD3
ABCA1	ABCD3	SEPT9	SEPT9	SEPT7	AC005670.3
ABCA2	ABHD4	AACS	SEPT11	SEPT11	AC127496.7
ABCA7	ABL2	AAK1	AAR2	AAAS	AGO1
ABCB9	AC008755.1	AAR2	AARS	AAK1	APAF1
ABCC3	AC022364.1	AARS	ABCA1	AAR2	ATP6V0E1
ABCE1	AC025524.2	AARS2	ABCA17P	AARS	ATR
ABCG2	ACACA	ABCA1	ABCA2	AASDHPPT	COBL
ABHD11	ACO1	ABCA13	ABCA3	ABCA2	COL18A1
ABL1	ACTB	ABCA2	ABCA7	ABCA5	SEPT2
ABR	ACTR1A	ABCA3	ABCB10	ABCA7	SEPT9
AC005670.3	ACVR1B	ABCA7	ABCB8	ABCB10	SMIM20
AC013564.1	ADIPOR1	ABCB10	ABCB9	ABCB7	AARS
AC022966.1	ADNP	ABCB7	ABCC5	ABCB9	ABCA1
AC024075.2	ADRB2	ABCB9	ABCD1	ABCC10	ABCA2
AC027237.1	AFF1	ABCC3	ABCF1	ABCC4	ABCA7
AC069243.1	AGAP3	ABCC4	ABCF3	ABCC5	ABCB10
AC087741.3	AHCTF1	ABCC5	ABCG1	ABCD1	ABCB9
AC124319.1	AHCY	ABCD1	ABHD10	ABCD3	ABCC5
AC127496.7	AK2	ABCD3	ABHD11	ABCD4	ABCF1
AC132872.4	AK4	ABCD4	ABHD12	ABCF1	ABCF3
ACACA	AL356274.2	ABCE1	ABHD13	ABCF2	ABHD11
ACADVL	AL357084.1	ABCF1	ABHD17B	ABCF3	ABHD12
ACO2	AMD1	ABCF2	ABHD18	ABHD10	ABHD13
ACOX1	AMFR	ABCF3	ABHD2	ABHD11	ABHD3
ACP7	ANKRD52	ABCG2	ABHD3	ABHD12	ABHD4
ACTB	AP3M1	ABHD11	ABHD4	ABHD13	ABL1
ACTN4	APAF1	ABHD12	ABL1	ABHD17B	ABL2
ACTR1A	APC	ABHD13	ABL2	ABHD18	ABRAXAS2
ACTR1B	ARAF	ABHD3	ABRAXAS2	ABHD2	AC002056.1
ADAM17	ARF6	ABHD4	AC000123.3	ABHD3	AC004156.1
ADCK1	ARID2	ABI1	AC002056.1	ABHD4	AC005255.2
ADCK2	ARPIN	ABI2	AC004156.1	ABI1	AC005332.6
ADCY1	ARPP19	ABL1	AC004551.1	ABL1	AC006538.1
ADCY3	ARV1	ABL2	AC004835.1	ABL2	AC007528.1
ADCY6	ASMTL	ABLIM1	AC005255.2	ABRACL	AC008755.1
ADD2	ASPH	ABR	AC005332.6	ABRAXAS2	AC010761.1
ADGRE5	ASXL1	ABRAXAS2	AC005726.1	AC000123.3	AC015813.6
ADGRL1	ATF6B	AC002056.1	AC006001.3	AC002056.1	AC022966.1
ADK	ATG13	AC003665.1	AC006483.1	AC002558.1	AC025171.1
ADORA2B	ATM	AC004086.1	AC006538.1	AC004156.1	AC027237.1
ADRB2	ATP2B1	AC004156.1	AC007312.1	AC004241.3	AC034198.2
AFAP1	ATP5F1B	AC004551.1	AC007318.2	AC004840.1	AC073861.1
AFDN	ATP5MC2	AC004803.1	AC007528.1	AC004846.2	AC079944.2
AFF1	ATP6V0E1	AC004816.1	AC007666.1	AC004877.1	AC083873.1
AFF4	ATP8B1	AC004917.1	AC007823.1	AC004889.1	AC087289.1
AGAP1	ATR	AC005154.2	AC007842.1	AC004922.1	AC090114.1
AGRN	AVL9	AC005255.2	AC008429.2	AC005255.2	AC092881.1
AHCY	AXIN2	AC005261.2	AC008438.1	AC005261.2	AC104297.1
AHNAK	B3GALNT2	AC005304.3	AC008755.1	AC005332.3	AC104619.1
AHNAK2	BAIAP2L1	AC005332.3	AC008771.1	AC005332.6	AC118549.1
AIP	BCL2L12	AC005332.6	AC009303.4	AC005332.7	AC140076.1
AKAP13	BDP1	AC005670.3	AC010733.1	AC005532.1	ACACA
AKT1	BET1	AC005840.1	AC010761.1	AC005670.3	ACADVL
AL050331.1	BEX3	AC006001.3	AC011477.8	AC005833.1	ACAT1
AL080317.1	BNIP3L	AC006538.1	AC011840.1	AC005906.2	ACLY
AL118506.1	BRD2	AC006538.2	AC012146.1	AC006116.11	ACO2
AL162171.1	BRK1	AC007312.1	AC015813.6	AC006483.1	ACOX1
AL365181.2	BRPF3	AC007528.1	AC018521.5	AC006538.1	ACTB
AL365181.3	BTBD7	AC007878.1	AC020917.1	AC006538.2	ACTN4
AL590867.2	BTF3	AC008755.1	AC021205.3	AC006960.3	ACTR1A
AL592295.1	BTG3	AC009948.4	AC021231.2	AC007318.2	ACTR1B
ALCAM	C12orf45	AC010325.1	AC022364.1	AC007390.1	ACTR2
ALKBH4	C19orf48	AC010327.1	AC022966.1	AC007528.1	ACVR1B
ALKBH5	C1orf116	AC010422.8	AC025171.1	AC007695.1	ACVR2B
ALMS1	C1orf43	AC010503.4	AC027237.1	AC007842.1	ADAM10
AMFR	C22orf39	AC010761.1	AC027807.2	AC007878.1	ADAM15
AMOTL1	C5orf22	AC010894.2	AC034198.2	AC007996.1	ADAM17
AMOTL2	C6orf89	AC011290.2	AC036214.2	AC008438.1	ADAR
ANAPC2	CALCOCO2	AC011944.2	AC055716.2	AC008554.1	ADCK1
ANKLE1	CALD1	AC015802.1	AC073111.4	AC008755.1	ADCK2
ANKRD17	CALU	AC015813.6	AC073861.1	AC008764.9	ADCY3
ANKRD33B	CAPRIN1	AC016542.2	AC073869.1	AC008771.1	ADCY6
ANKRD40	CAST	AC018868.2	AC078846.1	AC009088.1	ADGRA3
ANKRD52	CCDC117	AC020741.1	AC079944.2	AC009090.4	ADGRL1
ANKRD9	CCDC12	AC020893.1	AC083873.1	AC009236.1	ADGRL2
ANKS1A	CCDC71	AC020916.1	AC087289.1	AC009242.1	ADIPOR1
ANKS3	CCDC85C	AC022167.2	AC090114.1	AC009275.1	ADM
ANO6	CCNB1	AC022400.5	AC091053.1	AC009318.4	ADNP
ANXA6	CCND1	AC022400.8	AC091057.1	AC009404.1	ADORA2B
AP1B1	CCNE2	AC022966.1	AC092279.1	AC010325.1	ADPGK
AP1M1	CCNI	AC025171.1	AC092573.1	AC010422.2	ADRB2
AP2B1	CCNT1	AC025171.2	AC092881.1	AC010422.8	ADRM1
AP3M1	CD164	AC026470.1	AC093525.8	AC010503.4	AFAP1
APBA1	CD9	AC027237.1	AC093627.4	AC010643.1	AFDN
APP	CDC42SE2	AC027290.2	AC098934.1	AC010761.1	AFF1
ARAP1	CDKN1A	AC027796.4	AC099850.1	AC011290.2	AFF4
ARCN1	CECR2	AC034198.2	AC104083.1	AC011468.5	AGAP1
ARF3	CELF1	AC073861.1	AC104297.1	AC011477.8	AGAP3
ARF6	CENPBD1P1	AC079944.2	AC104619.1	AC011498.5	AGBL5
ARHGAP23	CEP170B	AC080038.1	AC109347.1	AC011498.6	AGPAT1
ARHGAP26	CETN2	AC080188.2	AC109466.1	AC011611.3	AGPAT3
ARHGDIA	CHD2	AC083873.1	AC114341.1	AC011912.1	AHCTF1
ARHGEF10L	CHD8	AC084357.1	AC114495.2	AC012313.2	AHCY
ARHGEF11	CLCN3	AC087289.1	AC117453.1	AC012360.3	AHNAK
ARHGEF17	CLDN12	AC090114.1	AC118549.1	AC012618.3	AIP
ARHGEF26-AS1	CLSTN1	AC091057.1	AC127496.7	AC015813.6	AK2
ARIH1	CMAS	AC091196.1	AC129492.7	AC015849.1	AK4
ARL4A	CMTR2	AC092127.1	AC140076.1	AC016542.2	AKAP13
ARNTL2	CNOT1	AC092135.1	AC240565.2	AC016542.3	AKAP8
ARRB1	COA1	AC092881.1	AC244033.2	AC016590.4	AKT1
ASCC3	COBL	AC093512.2	AC245884.10	AC016734.2	AKT2
ASF1B	COL18A1	AC097512.1	ACACA	AC016876.1	AL050331.1
ASMTL	COLCA1	AC098613.1	ACAD8	AC018755.1	AL080317.1
ASNA1	COPS7A	AC102945.2	ACADS	AC019131.2	AL118506.1
ASPH	COPS7B	AC103591.1	ACADVL	AC020658.3	AL139100.1
ASPM	COX7C	AC103760.1	ACAT1	AC020658.7	AL162171.1
ASPSCR1	CPEB2	AC104297.1	ACBD5	AC020661.1	AL357084.1
ASXL1	CPNE3	AC104619.1	ACER2	AC020893.1	AL365181.2
ATAD3B	CRBN	AC105235.1	ACLY	AC020917.1	AL365203.2
ATF6	CREBRF	AC105339.6	ACO2	AC021205.3	AL590867.2
ATF6B	CRYBG3	AC107954.1	ACOX1	AC021231.2	ALAD
ATG13	CSNK2A1	AC108010.1	ACP6	AC022150.4	ALCAM
ATG9A	CSTF1	AC109347.1	ACPP	AC022167.2	ALDH18A1
ATL2	CTDSP1	AC110048.2	ACTB	AC022893.1	ALDH3A2
ATL3	CTDSP2	AC115284.4	ACTN4	AC022966.1	ALDH6A1
ATN1	CTDSPL2	AC115837.1	ACTR1A	AC023043.4	ALDOC
ATP10A	CTNNB1	AC116021.1	ACTR1B	AC023513.1	ALG10B
ATP13A2	CUL2	AC118549.1	ACTR2	AC025171.1	ALG3
ATP2A2	CXCL10	AC119673.2	ACTR8	AC025171.2	ALKBH4
ATP2B4	CYB561A3	AC122688.3	ACVR1B	AC025181.2	ALKBH5
ATP2C1	CYC1	AC124319.1	ACVR2B	AC025370.2	ALMS1
ATP2C2-AS1	CYREN	AC125807.2	ADAM10	AC025442.2	AMD1
ATP5F1B	DAGLA	AC131212.3	ADAM15	AC026120.1	AMDHD2
ATP5F1D	DAPK3	AC131235.1	ADAM17	AC026333.4	AMER1
ATP5MC1	DBI	AC132825.1	ADAR	AC026470.1	AMFR
ATP5MC2	DCPS	AC132872.4	ADCK1	AC027237.1	AMMECR1
ATP5PO	DCTN3	AC135048.4	ADCK2	AC027682.6	AMMECR1L
ATP6V0E1	DDIT4	AC139768.1	ADCY10P1	AC027796.1	AMOTL1
ATP8B2	DDX24	AC139795.1	ADCY3	AC027796.4	AMOTL2
ATR	DEGS1	AC140076.1	ADCY6	AC034102.1	ANAPC11
ATXN2	DGAT2	AC234917.3	ADCY9	AC034102.7	ANAPC13
ATXN2L	DHCR24	AC243772.2	ADGRA3	AC034198.2	ANAPC2
AVL9	DICER1	AC245297.3	ADGRL1	AC046134.2	ANAPC5
AVPI1	DMTN	ACAA1	ADGRL2	AC048341.1	ANGEL2
AXL	DNAJC30	ACACA	ADI1	AC055716.2	ANKEF1
B4GALT7	DNAJC8	ACADS	ADIPOR1	AC067940.1	ANKFY1
BACE1	DSTYK	ACADSB	ADIPOR1P2	AC069154.1	ANKH
BAG6	DYNC1H1	ACADVL	ADM	AC073270.2	ANKLE2
BAZ1A	EEF1AKMT4	ACAP1	ADNP	AC073310.1	ANKRD11
BAZ2A	EEF1E1	ACAT1	ADPGK	AC073861.1	ANKRD12
BCAM	EEF2	ACBD3	ADPRM	AC073869.1	ANKRD17
BCL2L1	EFTUD2	ACCS	ADRB2	AC074052.1	ANKRD28
BCL6	EI24	ACIN1	ADRM1	AC074366.1	ANKRD40
BCL9L	EIF2AK4	ACLY	ADSL	AC078846.1	ANKRD50
BCORL1	EIF2B4	ACO2	AFAP1	AC079089.1	ANKRD52
BCR	EIF3B	ACOT11	AFF1	AC079944.2	ANKS1A
BIRC3	EIF3H	ACOT9	AFF4	AC083843.3	ANKS3
BIRC5	ELL2	ACOX1	AGA	AC083843.4	ANLN
BIRC6	ELOC	ACOX2	AGAP1	AC083873.1	ANO10
BMP1	ELOVL6	ACOX3	AGAP3	AC084036.1	ANO6
BMP2K	EMB	ACP6	AGBL5	AC084824.4	ANXA6
BNIP3L	EMD	ACP7	AGK	AC087222.1	AOPEP
BPTF	EPPK1	ACSL3	AGPAT1	AC087289.1	AP1B1
BRD2	ERBB2	ACSL4	AGPAT3	AC087741.3	AP1G1
BRD8	ERCC6	ACSL5	AGPAT5	AC087821.1	AP1M1
BRI3BP	ERGIC3	ACTB	AHCTF1	AC090114.1	AP2M1
BRK1	EXOC7	ACTG1P1	AHCY	AC090510.1	AP2S1
BRPF3	FAF2	ACTG2	AHCYL1	AC091021.1	AP3D1
BTF3	FAM104A	ACTN1	AHCYP7	AC091144.2	AP3M1
BUB3	FAM76A	ACTN4	AHNAK	AC091390.4	APBB2
C11orf45	FAT1	ACTR10	AHRR	AC091544.4	APC
C12orf45	FBRS	ACTR1A	AIG1	AC092139.1	APEH
C17orf51	FBXL20	ACTR1B	AIP	AC092161.1	APEX1
C1orf115	FBXO33	ACTR2	AK2	AC092279.1	API5
C1orf198	FITM2	ACTR3	AK4	AC092329.4	APP
C1orf43	FKBP1A	ACTR8	AKAP1	AC092573.1	APPL1
C1QTNF6	FNBP1L	ACVR1	AKAP10	AC092634.4	APTR
C5orf51	FNDC3A	ACVR1B	AKAP13	AC092653.1	AQP3
C9orf16	FOXA1	ACVR2A	AKAP8	AC092828.1	AQR
CACNB3	FOXJ3	ACVR2B	AKT1	AC092881.1	ARAF
CAD	FRMD6	ADAM10	AKT2	AC093249.6	ARAP1
CALU	FRYL	ADAM12	AL008721.2	AC093297.2	ARCN1
CAND1	FTO	ADAM15	AL021707.2	AC093512.2	ARF1
CANT1	FUBP1	ADAM17	AL022311.1	AC093536.1	ARF3
CANX	FUCA1	ADAM19	AL049840.4	AC093752.2	ARF5
CAP1	GALNT1	ADAM32	AL050331.1	AC093928.1	ARF6
CAPRIN1	GAPDHP72	ADAM8	AL080317.1	AC096642.1	ARFGAP2
CARMIL1	GATC	ADAM9	AL096870.1	AC097641.2	ARFGEF2
CAST	GDAP2	ADAMTS1	AL110114.1	AC099778.1	ARFGEF3
CBX3	GEMIN7	ADAMTS14	AL110505.1	AC103591.1	ARFRP1
CCDC113	GGA3	ADAMTS15	AL117329.1	AC104162.2	ARGLU1
CCDC183-AS1	GLS2	ADAMTSL3	AL118506.1	AC104297.1	ARHGAP11A
CCDC57	GMFB	ADAR	AL121839.2	AC104472.4	ARHGAP21
CCDC71L	GNAI3	ADARB1	AL133245.1	AC104472.5	ARHGAP26
CCDC85C	GNAS	ADCK2	AL139100.1	AC104581.4	ARHGAP35
CCND1	GNB2	ADCY1	AL157392.3	AC104619.1	ARHGAP5
CCNE2	GORASP2	ADCY3	AL162171.1	AC104806.2	ARHGEF11
CCNF	GOT2	ADCY6	AL162595.1	AC104825.1	ARHGEF18
CCNK	GPRIN1	ADD2	AL365203.2	AC106820.4	ARID1A
CCNT1	GRHL2	ADGRA3	AL365209.1	AC107021.2	ARID2
CCT4	GRN	ADGRE5	AL512328.1	AC107223.1	ARID4A
CCT5	GSE1	ADGRF2	AL512361.1	AC107926.1	ARIH1
CD151	GSS	ADGRF4	AL590867.2	AC107954.1	ARL14EP
CD164	H2AFV	ADGRG1	AL591846.1	AC108010.1	ARL4A
CD47	HACD3	ADGRG6	AL592295.1	AC108064.1	ARL5B
CD59	HADHB	ADGRL1	ALAD	AC108673.3	ARL8A
CD63	HBEGF	ADGRL2	ALB	AC108693.1	ARL8B
CD9	HBP1	ADGRV1	ALCAM	AC108734.3	ARPIN
CD99L2	HDAC2	ADIPOR1	ALDH18A1	AC108860.1	ARPP19
CDC14B	HECTD1	ADK	ALDH3A2	AC112220.2	ARRB1
CDC25B	HEY1	ADM	ALDH3B2	AC112715.1	ARSK
CDC37	HIPK2	ADNP	ALDH6A1	AC114341.1	ARV1
CDC42EP3	HIST1H4A	ADNP2	ALDOC	AC114490.3	ASAP2
CDC42SE1	HIST1H4B	ADORA2B	ALG1	AC114755.1	ASB1
CDC7	HIST1H4E	ADPGK	ALG10B	AC115284.4	ASB8
CDCP1	HMGCR	ADPRH	ALG12	AC115522.1	ASF1B
CDH1	HNRNPA1	ADRB2	ALG13	AC117498.2	ASH1L
CDK2	HNRNPR	ADRM1	ALG3	AC117503.3	ASMTL
CDK2AP1	HOXB13	AFAP1	ALKBH4	AC118549.1	ASNA1
CDK4	HSDL1	AFAP1-AS1	ALKBH5	AC121761.1	ASPH
CELF1	HSPA1B	AFDN	ALPL	AC122688.3	ASPM
CELSR1	IDI1	AFF1	ALS2	AC124242.1	ASPSCR1
CELSR2	IGBP1	AFF4	AMD1	AC124319.3	ASXL1
CELSR3	IL6R	AFMID	AMDHD2	AC124947.2	ASXL2
CENPBD1P1	INO80	AGA	AMER1	AC125494.2	ATAD1
CETN2	INTS8	AGAP1	AMER3	AC125807.2	ATAD2
CHD6	IST1	AGAP3	AMFR	AC126773.4	ATAD3B
CHERP	ITGB1BP1	AGBL5	AMIGO1	AC127496.7	ATF3
CHMP1A	JADE2	AGPAT1	AMMECR1	AC129502.1	ATF4
CHMP7	JPT2	AGPAT3	AMMECR1L	AC132008.2	ATF6
CHP1	KAT14	AGR2	AMOTL1	AC132872.1	ATF6B
CHPF	KBTBD4	AGRN	AMOTL2	AC134349.2	ATF7IP
CHST11	KCTD2	AHCTF1	ANAPC11	AC134878.2	ATG13
CHST14	KDELR1	AHCY	ANAPC13	AC135506.1	ATG5
CHST15	KDM5B	AHNAK	ANAPC16	AC139100.2	ATG9A
CHST3	KDM6A	AHNAK2	ANAPC5	AC139768.1	ATIC
CHSY1	KHDC4	AHRR	ANGEL2	AC139795.1	ATL2
CLASP1	KIAA1217	AIFM1	ANK3	AC139795.2	ATL3
CLDN12	KIDINS220	AIP	ANKEF1	AC140076.1	ATMIN
CLIP2	KIF1B	AJUBA	ANKFY1	AC240565.2	ATN1
CLSTN1	KLF13	AK2	ANKH	AC244033.2	ATP13A1
CLTC	KLHL24	AK4	ANKLE2	ACAA1	ATP13A2
CMIP	KMT2A	AKAP1	ANKMY1	ACACA	ATP13A3
CMTM6	KNL1	AKAP12	ANKRD11	ACACB	ATP1A1
CMTR1	KPNA6	AKAP13	ANKRD12	ACAD8	ATP1B1
CNDP2	KPNB1	AKAP7	ANKRD13A	ACADVL	ATP2A2
CNNM1	KXD1	AKAP8	ANKRD13B	ACAP3	ATP2B1
CNNM4	LAPTM4B	AKAP9	ANKRD13C	ACAT1	ATP2B4
CNOT1	LARP1	AKIP1	ANKRD27	ACBD3	ATP2C1
CNPPD1	LCMT2	AKT1	ANKRD28	ACBD5	ATP2C2-AS1
COA1	LDLR	AKT1S1	ANKRD40	ACIN1	ATP5F1B
COBL	LINC00960	AKT2	ANKRD50	ACLY	ATP5F1D
COCH	LITAF	AKT3	ANKRD52	ACO2	ATP5IF1
COG4	LMBR1L	AL022324.2	ANKS1A	ACOT11	ATP5MC1
COG8	LPCAT1	AL033397.1	ANKS3	ACOT13	ATP5MC2
COL14A1	LPIN3	AL035411.1	ANLN	ACOX1	ATP5MC3
COL18A1	LRPAP1	AL050331.1	ANO10	ACOX2	ATP5PO
COL4A3BP	LRRC57	AL080317.1	ANO6	ACP1	ATP6V0E2
COLGALT1	LRRC58	AL109809.1	ANXA6	ACP4	ATP6V1B2
COPRS	LSG1	AL117336.2	AOPEP	ACSL3	ATP6V1F
COPS7A	MAGED2	AL118506.1	AP000654.2	ACSM3	ATP8B1
COPS7B	MAP7D1	AL121832.2	AP000766.1	ACTA1	ATP8B2
COQ4	MAPK14	AL121832.3	AP002748.3	ACTB	ATPSCKMT
CORO1C	MBNL1	AL132780.2	AP002884.4	ACTG1P19	ATRN
COTL1	MCL1	AL133338.1	AP002956.1	ACTN1	ATRX
COX4I1	MCTP2	AL133520.1	AP002982.1	ACTN4	ATXN1L
CPD	MDH2	AL136295.7	AP003086.1	ACTR10	ATXN2
CPNE2	MDM4	AL138752.1	AP003721.4	ACTR1A	ATXN2L
CPPED1	MED13	AL138828.2	AP1B1	ACTR1B	ATXN7L2
CPQ	MED13L	AL139100.1	AP1G1	ACTR2	AVL9
CPT1C	MED21	AL139288.1	AP1M2	ACTR3	AVPI1
CPTP	MEF2D	AL139384.2	AP2M1	ACVR1B	AXIN2
CRAMP1	METAP2	AL161431.1	AP2S1	ACVR2A	B3GALNT2
CRIM1	MFSD14B	AL162171.1	AP3D1	ACVR2B	B4GALT3
CRYBG1	MIDN	AL162724.1	AP3M1	ADAM10	B4GALT4
CRYZ	MIER1	AL353613.2	AP3M2	ADAM15	B4GALT7
CSNK1D	MIF	AL353708.3	APAF1	ADAM32	BABAM1
CSNK1G1	MIR183	AL353740.1	APBB2	ADAMTS20	BACE1
CSNK1G2	MIR1913	AL357084.1	APBB3	ADAR	BAG1
CSPG4	MIR23B	AL359918.1	APC	ADARB1	BAG6
CSRP1	MIR328	AL365181.2	APEH	ADCK1	BAIAP2L1
CSTF1	MIR342	AL365203.2	APEX1	ADCK2	BAZ1A
CTDSP1	MIR34B	AL390066.1	API5	ADCY10	BAZ1B
CTDSP2	MIR502	AL390955.1	APLP2	ADCY10P1	BAZ2A
CTNNB1	MIR548Y	AL441883.1	APOOL	ADCY3	BBX
CTSB	MIR652	AL445487.1	APP	ADCY6	BCAM
CUX1	MIR6848	AL590560.2	APPL1	ADD1	BCAP29
CYB561A3	MKNK2	AL590867.2	APTR	ADGRA3	BCL2L1
CYFIP1	MLF2	AL592437.2	AQP3	ADGRG6	BCL2L11
DAG1	MPI	AL603750.1	AQR	ADGRL1	BCL2L12
DAGLA	MRTFB	AL691432.2	AR	ADGRL2	BCL2L2
DAPK1	MSI2	ALAD	ARCN1	ADGRV1	BCL6
DAPK3	MTMR1	ALAS1	ARF1	ADI1	BCL9
DBF4B	MTUS1	ALCAM	ARF3	ADIPOR1	BCL9L
DBI	MYC	ALDH18A1	ARF5	ADM	BCOR
DCAF12	MYD88	ALDH3A2	ARF6	ADNP	BCORL1
DCBLD2	NCKIPSD	ALDH3B1	ARFGAP2	ADNP2	BCR
DCLRE1A	NCOA3	ALDH5A1	ARFGEF2	ADORA2B	BDH1
DCPS	NCOA4	ALDH6A1	ARFGEF3	ADPGK	BDP1
DCTN1	NDRG1	ALDOC	ARFRP1	ADPRHL2	BEX3
DCTN3	NDUFAF8	ALG10	ARGLU1	ADPRM	BIRC5
DCTN4	NDUFB11	ALG10B	ARHGAP11A	ADRB2	BIRC6
DDHD2	NFE2L1	ALG3	ARHGAP17	ADRM1	BLOC1S2
DDIT4	NFKBIB	ALG6	ARHGAP21	ADSSL1	BMI1
DDX23	NINJ1	ALKBH1	ARHGAP32	AEBP2	BMP2K
DDX5	NIPA2	ALKBH4	ARHGAP35	AF127577.4	BMPR2
DDX60L	NLRX1	ALKBH5	ARHGAP5	AFDN	BNIP3L
DELE1	NOB1	ALKBH8	ARHGEF11	AFF1	BOD1L1
DENND5B	NOP9	ALMS1	ARHGEF18	AFF3	BPTF
DGCR2	NORAD	ALOX12P2	ARID1A	AFF4	BRD2
DGCR8	NPHP3	ALOX5AP	ARID1B	AFG1L	BRD8
DHCR24	NRIP1	ALOXE3	ARID2	AFG3L1P	BRI3BP
DHCR7	NUB1	ALPK1	ARID4A	AFMID	BRK1
DHRS4L2	OTUD6B	ALS2CL	ARIH1	AGAP1	BRPF3
DHX30	PAPOLA	AMBRA1	ARL14EP	AGAP3	BSDC1
DHX38	PARP10	AMD1	ARL5B	AGBL5	BTBD7
DIAPH1	PARS2	AMDHD2	ARL8A	AGFG2	BTF3
DIMT1	PCNX3	AMER1	ARL8B	AGPAT1	BTG1
DIP2B	PDHB	AMFR	ARMC8	AGPAT3	BUB1
DMPK	PDXDC1	AMIGO1	ARMC9	AGPAT5	BUB1B
DMXL1	PELP1	AMMECR1	ARMH3	AGPS	BUB3
DNAJC24	PEX5	AMMECR1L	ARMH4	AHCTF1	BUD23
DNAJC30	PFN2	AMOTL1	ARPC2	AHCY	BYSL
DNAJC5	PHF10	AMOTL2	ARPP19	AHCYL1	BZW1
DNAJC7	PHF12	AMPD2	ARRB1	AHCYL2	C12orf45
DNAJC9	PHKB	AMPD3	ARSK	AHI1	C16orf58
DNM1	PIGP	ANAPC1	ARV1	AHNAK	C17orf51
DOCK1	PIGT	ANAPC11	ASAP2	AIFM1	C18orf25
DOCK5	PIGU	ANAPC13	ASB1	AIG1	C19orf12
DOCK9	PIMREG	ANAPC15	ASB13	AIP	C19orf48
DOP1B	PIP5K1A	ANAPC2	ASB8	AK2	C1orf112
DPAGT1	PKD1	ANAPC5	ASF1B	AK3	C1orf115
DPP8	PKM	ANGEL2	ASH1L	AK4	C1orf116
DPYSL2	PKP4	ANKEF1	ASMTL	AKAP10	C1orf159
DPYSL3	PLAGL2	ANKFY1	ASNA1	AKAP11	C1orf198
DST	PLEC	ANKH	ASPH	AKAP13	C1orf216
DUSP22	PLEKHO1	ANKIB1	ASPM	AKAP5	C1orf226
DUT	PLPP1	ANKLE2	ASTE1	AKAP8	C1orf43
DYNC1H1	PLPP5	ANKMY2	ASXL1	AKAP9	C22orf39
DYNC2H1	PLPPR2	ANKRA2	ASXL2	AKIP1	C22orf46
E2F2	PLXNB2	ANKRD11	ASXL3	AKT1	C2CD5
ECT2	POLG	ANKRD12	ATAD1	AKT1S1	C2orf42
EEF2	POLG2	ANKRD13D	ATAD2	AKT2	C5orf22
EFHD2	PPP1R10	ANKRD17	ATAD2B	AL008721.2	C5orf24
EFL1	PPP1R12A	ANKRD18A	ATAD3B	AL021707.7	C5orf51
EFNA1	PPP2CA	ANKRD28	ATF3	AL022311.1	C6orf132
EFR3A	PPP3CA	ANKRD29	ATF4	AL022324.2	C6orf89
EFTUD2	PPP4C	ANKRD33B	ATF6	AL035411.1	CAB39
EGFR	PPP4R3A	ANKRD40	ATF6B	AL049779.4	CABLES2
EGLN1	PPT1	ANKRD50	ATF7IP	AL049830.1	CACNB3
EHMT2	PRDX6	ANKRD52	ATG13	AL049833.3	CACUL1
EIF2AK4	PRKACB	ANKRD9	ATG5	AL049834.1	CAD
EIF2B2	PRKCQ	ANKS1A	ATG9A	AL049873.2	CALCOCO2
EIF3H	PRR13	ANKS3	ATIC	AL050331.1	CALD1
EIF4EBP2	PRRG1	ANKS6	ATL2	AL080317.1	CALM1
ELAC2	PSMB6	ANLN	ATL3	AL096803.1	CALU
ELL	PSMC4	ANO1	ATMIN	AL096803.2	CAMSAP1
ELL2	PTCH1	ANO10	ATP11B	AL096870.1	CAND1
ELMSAN1	PTMS	ANO6	ATP13A1	AL109615.3	CANT1
ELOC	PUM2	ANO8	ATP13A2	AL109918.1	CANX
ELOVL6	RAB22A	ANPEP	ATP13A3	AL109936.2	CAP1
EMB	RABGGTB	ANTXR2	ATP1A1	AL118506.1	CAPRIN1
EMC4	RAC1	ANXA1	ATP1B1	AL121832.2	CAPRIN2
EMD	RALGAPB	ANXA11	ATP2A2	AL121906.2	CARM1
EMP3	RAP1GAP2	ANXA3	ATP2B1	AL132780.2	CASK
ENHO	RBM12	ANXA6	ATP2B4	AL133163.1	CASP8AP2
EP300	RBM15-AS1	ANXA7	ATP2C1	AL133245.1	CAST
EPAS1	RBM47	AOC1	ATP5F1AP3	AL136097.3	CBL
EPHB4	RC3H2	AOPEP	ATP5F1B	AL136295.7	CBLB
EPS15L1	RCAN3	AP000654.2	ATP5IF1	AL137077.1	CBX3
EPS8L2	RCN2	AP000842.3	ATP5MC1	AL137786.1	CBX5
ERAP2	RDH11	AP002495.1	ATP5MC2	AL138725.1	CBX6
ERCC1	REEP5	AP002748.3	ATP5MC3	AL138752.1	CCDC117
ERGIC3	RHOA	AP003555.2	ATP5MPL	AL139100.1	CCDC12
ERLIN2	RHPN2	AP1B1	ATP6V0A1	AL139288.1	CCDC14
ERO1A	RNF10	AP1G1	ATP6V0E1	AL157392.3	CCDC28B
ESYT2	RNF123	AP1M1	ATP6V0E2	AL157938.1	CCDC6
EVI5	RNF187	AP1S1	ATP6V1B2	AL158152.1	CCDC71
EXOC3	RNF26	AP1S3	ATP6V1D	AL161756.1	CCDC85C
EXOSC10	RNF44	AP2M1	ATP6V1F	AL162171.1	CCDC93
EXT2	RNFT2	AP2S1	ATP6V1FNB	AL162595.1	CCNB1
EXTL3	RNPEPL1	AP3D1	ATP8B1	AL163952.1	CCND1
EZH1	RNU4-1	AP3M1	ATP8B2	AL353708.3	CCND3
EZR	RNU4-2	AP3M2	ATPSCKMT	AL356488.3	CCNDBP1
FADS2	RNVU1-15	AP5B1	ATRN	AL356776.2	CCNE1
FAF2	RPF1	AP5Z1	ATRX	AL357084.1	CCNE2
FAM104A	RPL32	APBA2	ATXN10	AL359918.1	CCNF
FAM129B	RPS10P5	APBB2	ATXN1L	AL365181.2	CCNI
FAM13A	RPS14	APC	ATXN2	AL365203.2	CCNJ
FAM167A	RPS18	APCDD1L-DT	ATXN2L	AL365295.1	CCNK
FAM171A1	RPS23	APEH	ATXN3	AL390123.1	CCNQ
FAM171B	RPSA	APEX1	ATXN7L1	AL390879.1	CCNT1
FAM201A	RTL8A	API5	ATXN7L2	AL391256.1	CCNY
FAM20B	RTN3	APMAP	AVL9	AL441883.1	CCT3
FAM50A	RTN4	APOBEC3C	AXIN1	AL445487.1	CCT4
FAM53B	RUFY1	APOL2	AXIN2	AL512361.1	CCT5
FAM83A	SAYSD1	APOL3	B3GALT5-AS1	AL512380.1	CCT7
FANCG	SBDS	APOPT1	B3GNT2	AL512633.1	CD151
FANCI	SCD	APP	B3GNT9	AL512635.1	CD164
FASN	SCYL1	APPBP2	B4GALT3	AL590235.2	CD47
FASTK	SDE2	APPL1	B4GALT4	AL590867.2	CD59
FASTKD2	SEC11A	APTR	BABAM1	AL592437.2	CD63
FAT1	SEC16A	AQP3	BACE1	AL604028.2	CD81
FBRSL1	SEC23IP	AQR	BACH1	AL606760.2	CD9
FBXL20	SEC31A	ARAF	BAG1	AL691432.1	CD99L2
FBXO45	SENP1	ARAP1	BAG6	AL691432.2	CDADC1
FBXO46	SESN1	ARAP2	BAIAP2L1	ALAD	CDC14B
FBXO7	SETD5	ARAP3	BAZ1B	ALB	CDC23
FBXW2	SETD7	ARCN1	BAZ2A	ALCAM	CDC25B
FKBP1A	SF3A1	AREL1	BBS9	ALDH18A1	CDC27
FKBP4	SGPL1	ARF1	BBX	ALDH1B1	CDC37
FKBP8	SH3BP4	ARF3	BCAP29	ALDH1L2	CDC37L1
FLII	SIN3A	ARF5	BCL2L11	ALDH3A2	CDC42
FLNB	SIPA1L1	ARF6	BCL2L12	ALDH6A1	CDC42BPB
FLNC	SKIV2L	ARFGAP1	BCL2L2	ALDH7A1	CDC42EP3
FNBP1	SLC29A1	ARFGAP2	BCL6	ALDOC	CDC42EP4
FNBP1L	SLC30A7	ARFGEF1	BCL9	ALG10	CDC42SE1
FNDC3A	SLC30A9	ARFGEF2	BCL9L	ALG10B	CDC42SE2
FOCAD	SLC35A2	ARFGEF3	BCOR	ALG12	CDC7
FOSL2	SLC35A4	ARFRP1	BCORL1	ALG14	CDC73
FOXJ2	SLC35B1	ARGLU1	BDH1	ALG3	CDCA2
FOXN2	SLC35B2	ARHGAP11A	BDP1	ALG6	CDCA7
FOXRED2	SLC38A2	ARHGAP18	BEX3	ALG8	CDCP1
FRAT1	SLC38A7	ARHGAP21	BFAR	ALKBH3	CDH1
FRYL	SLC39A14	ARHGAP23	BIRC5	ALKBH4	CDH3
FTL	SLC48A1	ARHGAP26	BIRC6	ALKBH5	CDK1
FTO	SMCO4	ARHGAP29	BLCAP	ALKBH8	CDK12
G3BP1	SMG1	ARHGAP35	BLOC1S2	ALMS1	CDK16
G6PD	SMIM13	ARHGAP42	BLOC1S6	ALOX12-AS1	CDK2
GAB2	SMIM15	ARHGAP5	BMI1	ALPK3	CDK2AP1
GALNT10	SMIM20	ARHGEF10L	BMP2K	ALS2	CDK4
GALNT2	SMIM27	ARHGEF11	BMPR2	AMBRA1	CDK6
GANC	SMIM29	ARHGEF17	BNIP3L	AMD1	CDKN1A
GAPDH	SNAP29	ARHGEF18	BOD1L1	AMDHD2	CDS1
GAPDHP35	SNHG14	ARHGEF2	BORA	AMER1	CDS2
GAPDHP72	SNHG15	ARHGEF28	BPHL	AMER3	CEBPZOS
GAREM1	SNHG25	ARHGEF7	BPTF	AMFR	CELF1
GATAD2B	SNHG29	ARID1A	BRAP	AMH	CELSR1
GATC	SNORD100	ARID2	BRD2	AMMECR1	CELSR2
GCN1	SNRPD2	ARID3A	BRD3	AMMECR1L	CELSR3
GDAP2	SOX4	ARID3B	BRD7	AMOT	CEMIP2
GEMIN4	SPEN	ARID4A	BRD8	AMOTL1	CENPB
GEMIN5	SPRYD4	ARID5A	BRF2	ANAPC1	CENPBD1P1
GGNBP2	SPTBN2	ARID5B	BRI3BP	ANAPC11	CENPF
GIGYF1	SSBP4	ARIH1	BRINP1	ANAPC13	CENPK
GLRX3	SSRP1	ARIH2	BRK1	ANAPC2	CEP104
GLS	ST3GAL1	ARL14EP	BRPF3	ANAPC5	CEP170B
GLUL	STARD3NL	ARL16	BRWD3	ANGEL1	CEP85
GNA11	STEAP1	ARL4A	BSDC1	ANGEL2	CES2
GNA12	STEAP2	ARL5A	BSPRY	ANK3	CETN2
GNB1	STRN	ARL5B	BTBD2	ANKEF1	CFDP1
GNB2	STRN3	ARL8A	BTBD7	ANKFY1	CFL2
GNG12	SURF4	ARL8B	BTBD9	ANKH	CGN
GOLPH3	SUSD6	ARMC6	BTF3	ANKLE2	CHD6
GORASP2	SYVN1	ARNTL2	BTG1	ANKMY1	CHD8
GOT2	TAF1C	ARPC5L	BTRC	ANKMY2	CHERP
GPAA1	TAF9	ARPIN	BUB1	ANKRD10	CHFR
GPAT4	TAOK3	ARPP19	BUB1B	ANKRD11	CHMP1A
GPD2	TARBP2	ARRB1	BUB3	ANKRD12	CHMP2A
GPR107	TBC1D12	ARSA	BUD23	ANKRD13B	CHMP7
GPRC5A	TBC1D16	ARSG	BYSL	ANKRD13C	CHP1
GPRIN2	TCEAL1	ARSK	BZW1	ANKRD17	CHPF2
GRAMD1B	TECPR2	ARV1	C11orf45	ANKRD18A	CHRNA5
GRN	TES	ASAH1	C11orf49	ANKRD18B	CHST11
GSDMB	TIMM8B	ASAP2	C11orf95	ANKRD27	CHST14
GSE1	TIRAP	ASB1	C12orf4	ANKRD28	CHST15
GSN	TLN1	ASB8	C12orf45	ANKRD29	CHST3
GSR	TMCO1	ASCC2	C14orf28	ANKRD40	CHSY1
GTF2A1	TMED10	ASF1B	C15orf39	ANKRD46	CIART
GTF3C5	TMEM101	ASH1L	C15orf40	ANKRD50	CIRBP
GTSE1	TMEM104	ASIC1	C16orf58	ANKRD52	CITED2
H6PD	TMEM127	ASMTL	C16orf72	ANKS1A	CLASP1
HACD3	TMEM147-AS1	ASNA1	C17orf51	ANKS3	CLCN3
HAUS2	TMEM167A	ASPH	C18orf25	ANLN	CLDN12
HBEGF	TMEM168	ASPHD1	C19orf12	ANO10	CLDN7
HCFC2	TMEM184B	ASPM	C19orf25	ANO6	CLDND1
HDLBP	TMEM184C	ASPSCR1	C19orf44	ANO7	CLEC16A
HECTD1	TMEM201	ASTN2	C19orf48	ANO8	CLIC4
HELLS	TMEM70	ASXL1	C1orf112	ANXA11	CLIP1
HELZ	TMEM87A	ASXL2	C1orf115	ANXA4	CLIP2
HERC2	TMPPE	ATAD1	C1orf116	ANXA6	CLMN
HGS	TMPRSS2	ATAD2	C1orf159	AOC3	CLOCK
HIP1	TNFRSF10D	ATAD2B	C1orf198	AOPEP	CLPP
HIPK2	TNRC6C	ATF2	C1orf21	AP000265.1	CLSTN1
HIST1H2AJ	TOMM7	ATF3	C1orf216	AP000553.3	CLTC
HIST1H4B	TOR1B	ATF4	C1orf226	AP000560.1	CMAS
HIVEP1	TPP1	ATF5	C1orf35	AP000766.1	CMIP
HK1	TRAM1	ATF6	C1orf43	AP001347.1	CMTM4
HLA-A	TRAPPC11	ATF6B	C22orf39	AP001992.1	CMTM6
HLA-B	TRIM24	ATF7	C22orf46	AP002530.1	CMTR1
HMG20A	TRIM27	ATF7IP	C2CD2	AP002784.1	CMTR2
HNRNPA2B1	TRIM28	ATG13	C2CD2L	AP002884.1	CNDP2
HNRNPM	TRIM52	ATG16L2	C2CD5	AP003119.3	CNIH1
HNRNPUL2	TRMT10A	ATG2A	C2orf42	AP003486.1	CNIH4
HOXA10-AS	TRPM4	ATG5	C2orf49	AP003557.1	CNNM1
HP1BP3	TRRAP	ATG7	C3orf35	AP003717.4	CNNM3
HSP90AB1	TSC22D1	ATG9A	C4orf19	AP005136.2	CNNM4
HSPG2	TSN	ATIC	C5orf22	AP006623.1	CNOT1
HTT	TSPAN17	ATL2	C5orf24	AP1AR	CNOT10
HUWE1	TUFM	ATL3	C5orf51	AP1B1	CNOT6
IARS	TUG1	ATMIN	C6orf120	AP1G1	CNOT9
IBTK	TULP4	ATN1	C6orf132	AP1M1	CNPPD1
ID2	TXNIP	ATP10A	C6orf203	AP1M2	COA1
IDH2	UBAP2L	ATP11C	C6orf89	AP1S3	COA7
IFT22	UBE2D3	ATP13A1	CA2	AP2M1	COG1
IGF2R	UBE3D	ATP13A2	CAB39	AP2S1	COG3
IGFBP6	UBP1	ATP13A3	CABLES2	AP3D1	COG4
IGFBPL1	UHMK1	ATP1A1	CACNA1D	AP3M1	COG8
IL11RA	USP22	ATP1A3	CACUL1	AP3S2	COL4A3BP
ILF3	USP54	ATP1B1	CACYBP	AP4B1	COL7A1
IMPDH1	VAMP3	ATP2A1	CAD	AP4E1	COLCA1
IMPDH1P11	VCP	ATP2A2	CADPS2	AP5B1	COLGALT1
INTS10	VTA1	ATP2B1	CALCB	AP5M1	COMMD6
INTS3	VTI1B	ATP2B4	CALCOCO2	AP5Z1	COPB2
INTS5	WDR37	ATP2C1	CALD1	APAF1	COPG1
INTS8	XPNPEP3	ATP2C2	CALM1	APBB2	COPRS
IPO5	XPR1	ATP2C2-AS1	CALR	APC	COPS2
IPO9	XRCC5	ATP5F1B	CALU	APEH	COPS4
IQGAP1	YKT6	ATP5F1D	CAMKK2	APEX1	COPS7A
IRS1	YTHDF3	ATP5IF1	CAMLG	APEX2	COPS7B
IST1	ZBTB24	ATP5MC1	CAMSAP1	API5	COQ4
ITGA3	ZBTB38	ATP5MC2	CAMTA1	APLN	COQ6
ITGA6	ZDHHC18	ATP5MC3	CAMTA2	APLP2	COQ8A
ITGAV	ZFAND3	ATP5PO	CAND1	APMAP	COQ9
ITGB3	ZFP37	ATP6V0A2	CANT1	APOL6	CORO1C
ITPK1	ZMAT3	ATP6V0E2	CANX	APOO	COTL1
ITPKB	ZMIZ1	ATP6V1B2	CAP1	APOOL	COX10
ITPR3	ZNF121	ATP6V1F	CAPN10	APP	COX15
ITPRID2	ZNF197	ATP6V1H	CAPN2	APPL1	COX4I1
JADE2	ZNF24	ATP8A1	CAPRIN1	APTR	COX7C
JAKMIP3	ZNF264	ATP8B1	CAPRIN2	AQP3	CPD
JMJD4	ZNF281	ATP9A	CAPZA2	AQR	CPEB2
JPT2	ZNF341	ATPSCKMT	CAPZB	AR	CPNE2
JUP	ZNF416	ATR	CARM1	ARAF	CPNE3
KANSL1	ZNF473	ATRN	CASC2	ARAP1	CPSF7
KAT6A	ZNF562	ATRX	CASK	ARAP3	CPT1C
KATNB1	ZNF605	ATXN1L	CASP3	ARCN1	CPT2
KCTD17	ZNF623	ATXN2	CASP8AP2	ARF1	CPTP
KDELR1	ZNF652	ATXN2L	CAST	ARF3	CRAMP1
KDELR2	ZNF687	ATXN7L2	CASZ1	ARF5	CRBN
KIAA0100	ZNF714	AUP1	CBL	ARF6	CREB3L2
KIAA0513	ZNF770	AURKA	CBLB	ARFGAP2	CREB3L4
KIAA1211	ZNF91	AVL9	CBLL1	ARFGAP3	CREBL2
KIAA1549	ZNRF1	AVPI1	CBLN2	ARFGEF1	CREBRF
KIAA1671		AXIN1	CBX2	ARFGEF2	CRIM1
KIF18B		AXL	CBX3	ARFGEF3	CRK
KIF1C		B2M	CBX5	ARFRP1	CRKL
KIF26B		B3GALNT2	CBX6	ARG2	CRTC2
KIF4A		B3GNT3	CCDC117	ARGLU1	CRY1
KLC1		B3GNT5	CCDC121	ARHGAP11A	CRYBG1
KLF13		B4GALNT1	CCDC124	ARHGAP17	CRYBG3
KLF5		B4GALT2	CCDC136	ARHGAP20	CRYZ
KLHDC10		B4GALT3	CCDC14	ARHGAP21	CSDE1
KLHL18		B4GALT4	CCDC186	ARHGAP26	CSE1L
KLHL42		B4GALT5	CCDC25	ARHGAP31	CSNK1D
KMT2B		B4GALT7	CCDC28A	ARHGAP32	CSNK1G1
KNL1		B9D1	CCDC28B	ARHGAP35	CSNK1G2
KNTC1		BAALC-AS1	CCDC32	ARHGAP5	CSNK2A1
KPNB1		BABAM1	CCDC40	ARHGEF11	CSTF1
KREMEN1		BACE1	CCDC57	ARHGEF18	CSTF2
KRT80		BACE1-AS	CCDC6	ARHGEF3	CSTF2T
KXD1		BACH2	CCDC71	ARHGEF35	CTC1
LAMB2		BAG1	CCDC82	ARHGEF37	CTCF
LAMC1		BAG5	CCDC93	ARHGEF7	CTDSP1
LAMP2		BAG6	CCL22	ARID1A	CTDSP2
LAMTOR2		BAHD1	CCNA2	ARID2	CTDSPL
LAPTM4A		BAIAP2L1	CCNB1	ARID3A	CTDSPL2
LAPTM4B		BAZ1A	CCND1	ARID3B	CTNNB1
LARP1		BAZ1B	CCND3	ARID4A	CTNND1
LASP1		BAZ2A	CCNDBP1	ARID4B	CTPS1
LATS2		BAZ2B	CCNE1	ARIH1	CTSB
LCMT2		BBS5	CCNE2	ARIH2	CTTN
LCOR		BBX	CCNF	ARL1	CUL2
LDHA		BCAM	CCNG2	ARL14EP	CUTA
LDLR		BCAP29	CCNI	ARL16	CUTALP
LENG8		BCAP31	CCNJ	ARL4A	CUX1
LEPROT		BCAR3	CCNK	ARL4C	CWC27
LGALS3BP		BCAS3	CCNQ	ARL5B	CYB561
LINC00205		BCAS4	CCNT1	ARL5C	CYB561A3
LINC00648		BCDIN3D	CCNT2	ARL6IP1	CYB5A
LINC00963		BCL10	CCNY	ARL6IP5	CYB5R1
LITAF		BCL2	CCP110	ARL6IP6	CYC1
LNPEP		BCL2L1	CCSAP	ARL8A	CYFIP1
LOXL2		BCL2L11	CCT2	ARL8B	CYHR1
LPAR1		BCL2L12	CCT3	ARMC6	CYREN
LPCAT1		BCL2L13	CCT4	ARMC8	CYTH1
LPGAT1		BCL2L2	CCT5	ARMH1	DAG1
LPIN1		BCL6	CCT7	ARMH3	DAGLA
LPIN2		BCL9	CD151	ARMH4	DAP3
LPP		BCL9L	CD164	ARNTL	DAPK3
LRBA		BCOR	CD276	ARPC3	DBF4
LRCH3		BCORL1	CD47	ARPC5	DBI
LRP1		BCR	CD59	ARPIN	DCAF11
LRP10		BDH1	CD63	ARPP19	DCAF12
LRP5		BDP1	CD81	ARRB1	DCAF5
LRPAP1		BEGAIN	CD9	ARRDC3	DCHS1
LRPPRC		BET1L	CD99L2	ARRDC4	DCLRE1A
LRRC3		BEX3	CDADC1	ARSA	DCLRE1B
LRRC57		BICD1	CDC14B	ARSK	DCPS
LRRC59		BICD2	CDC23	ARV1	DCTN1
LRRK1		BICRAL	CDC25B	ASAP1	DCTN3
LSR		BIRC5	CDC27	ASAP2	DCTN4
LYST		BIRC6	CDC37	ASB1	DCTPP1
MACF1		BLOC1S2	CDC37L1	ASB8	DCUN1D3
MAGT1		BLOC1S5	CDC42	ASCC2	DDA1
MALT1		BLVRB	CDC42BPB	ASCC3	DDB1
MAN2A2		BMI1	CDC42EP4	ASF1B	DDHD2
MAP1B		BMP1	CDC42SE1	ASH1L	DDIAS
MAP2K3		BMP2	CDC42SE2	ASH2L	DDIT4
MAP3K1		BMP2K	CDC7	ASIC1	DDX10
MAP3K11		BMP4	CDC73	ASMTL	DDX17
MAP3K14		BMP5	CDCA2	ASNA1	DDX21
MAP3K2		BMP8B	CDCA7	ASPH	DDX23
MAP3K20		BMPR2	CDCA7L	ASPM	DDX24
MAP4K3		BNC2	CDCA8	ASPSCR1	DDX3X
MAP7D1		BOC	CDCP1	ASS1P2	DDX41
MAPKAPK2		BOD1	CDH1	ASTE1	DDX5
MAPKAPK3		BOD1L1	CDH2	ASXL1	DDX6
MARCH2		BOK	CDH24	ASXL2	DELE1
MARCH6		BOP1	CDH3	ATAD1	DENND1B
MARF1		BORCS7	CDK1	ATAD2	DENND4C
MARK2		BORCS8	CDK12	ATAD3B	DERL2
MBNL1		BPTF	CDK16	ATF1	DESI1
MBNL2		BRAF	CDK19	ATF2	DGAT2
MBOAT2		BRCA1	CDK2	ATF3	DGCR2
MBP		BRD2	CDK20	ATF4	DGCR8
MBTPS2		BRD4	CDK2AP1	ATF6	DGUOK
MCL1		BRD8	CDK4	ATF6B	DHCR24
MCM2		BRD9	CDK5R1	ATF7	DHCR7
MCM3		BRI3	CDK5RAP2	ATF7IP	DHODH
MCM5		BRI3BP	CDK6	ATG10	DHRS4L2
MCOLN3		BRINP2	CDKN1C	ATG12	DHRS7B
MDH1		BRIP1	CDS1	ATG13	DHX30
MDH2		BRK1	CDS2	ATG14	DHX33
MDN1		BRMS1	CEBPG	ATG3	DHX38
MED13		BRPF1	CEBPZOS	ATG4B	DIAPH1
MED15		BRPF3	CELF1	ATG5	DIAPH3
MEF2A		BRWD1	CELSR2	ATG9A	DICER1
MEF2D		BSDC1	CELSR3	ATIC	DIP2B
MEGF6		BSG	CEMIP2	ATL2	DIS3
MELTF		BSN	CENPB	ATL3	DLD
MEMO1		BSPRY	CENPBD1P1	ATM	DLG5
MEX3A		BTBD10	CENPF	ATMIN	DLGAP4
MFHAS1		BTBD3	CENPK	ATN1	DLGAP5
MFSD10		BTBD7	CEP104	ATP11B	DMPK
MFSD11		BTF3	CEP170B	ATP13A1	DMXL1
MFSD14C		BTG1	CEP295	ATP13A2	DNAJA1
MFSD8		BTN2A1	CEP85	ATP13A3	DNAJB2
MGAT4B		BUB1	CEP89	ATP1A1	DNAJC11
MICAL2		BUB1B	CEP97	ATP1A3	DNAJC16
MICALL1		BUB3	CES2	ATP1B1	DNAJC21
MICB		BUD13	CETN2	ATP2A1	DNAJC24
MIER1		BUD23	CFAP410	ATP2A2	DNAJC27
MIF		BYSL	CFDP1	ATP2B1	DNAJC30
MINDY1		BZW1	CFL2	ATP2B4	DNAJC5
MINK1		C11orf24	CGN	ATP2C1	DNAJC7
MIR1913		C11orf49	CHCHD1	ATP2C2-AS1	DNAJC9
MIR31		C11orf68	CHCHD7	ATP5F1A	DNAL1
MIR34B		C12orf45	CHD4	ATP5F1AP3	DNM1
MIR4769		C12orf49	CHD6	ATP5F1B	DNM1L
MIR548Y		C15orf41	CHD8	ATP5F1D	DNM2
MITF		C16orf58	CHDH	ATP5IF1	DNPEP
MKI67		C17orf51	CHERP	ATP5MC1	DNTTIP1
MKNK1		C17orf80	CHFR	ATP5MC2	DOCK4
MKNK2		C18orf25	CHM	ATP5MC3	DOCK5
MLF2		C19orf12	CHMP1A	ATP5MG	DOCK9
MOB1A		C19orf24	CHMP2A	ATP5MPL	DOK3
MPP2		C19orf25	CHMP2B	ATP5PO	DOP1A
MROH1		C19orf44	CHMP7	ATP6V0A1	DOP1B
MROH6		C19orf48	CHP1	ATP6V0A2	DPAGT1
MRPL10		C19orf66	CHPF2	ATP6V0B	DPF2
MRPL22		C1orf112	CHRM2	ATP6V0D1	DPH2
MRPL49		C1orf115	CHRM4	ATP6V0E1	DPP8
MRPS16		C1orf116	CHRNA5	ATP6V0E2	DPY30
MRPS21		C1orf159	CHST12	ATP6V1A	DPYSL2
MRTFA		C1orf198	CHST15	ATP6V1B2	DPYSL3
MRTFB		C1orf216	CHST3	ATP6V1C1	DSC2
MTA2		C1orf226	CHSY1	ATP6V1D	DSG2
MTCH1		C1orf43	CHTOP	ATP6V1F	DSN1
MUC1		C1orf56	CIART	ATP6V1FNB	DSP
MUC16		C1orf74	CIRBP	ATP8B1	DST
MVD		C1QTNF6	CISD2	ATP8B2	DSTYK
MVP		C20orf27	CISD3	ATP9A	DTD1
MXRA7		C20orf96	CITED2	ATPAF1	DTX4
MYCL		C21orf91	CKAP2L	ATPSCKMT	DUS2
MYD88		C22orf39	CKAP5	ATR	DUSP10
MYH10		C22orf46	CLASP1	ATRN	DUSP23
MYH9		C2CD5	CLCN2	ATRX	DUSP28
MYL9		C2orf42	CLCN3	ATXN1	DUSP4
MYO18A		C2orf69	CLDN12	ATXN10	DUSP7
MYO5A		C2orf76	CLDN7	ATXN1L	DUT
MYO9A		C5orf24	CLDND1	ATXN2	DVL2
MYORG		C5orf30	CLEC16A	ATXN2L	DVL3
NACC1		C5orf51	CLHC1	ATXN3	DYNC1H1
NACC2		C5orf56	CLIC4	ATXN7L2	DYNLL2
NADK		C6orf132	CLIP1	AUH	DYRK1A
NAV1		C6orf89	CLIP2	AUP1	E2F2
NBL1		C7orf50	CLK1	AURKA	E2F3
NCAPD3		C9orf85	CLMN	AURKB	E2F8
NCOA2		CA12	CLN3	AUXG01000058.1	EAF1
NCOA4		CA13	CLOCK	AVL9	EBLN3P
NCS1		CA5B	CLPP	AVPI1	EBPL
NDRG1		CAB39	CLSTN1	AXIN2	ECE1
NDST1		CABLES2	CLTC	AZIN1	EDC4
NDUFB11		CACNA2D2	CMAS	AZIN2	EDEM1
NDUFV3		CACNB3	CMIP	B2M	EDEM3
NEAT1		CACUL1	CMTM4	B3GALNT1	EEF1A1P13
NELFA		CAD	CMTR1	B3GALNT2	EEF1AKMT4
NET1		CADM4	CMTR2	B3GNT2	EEF1B2P3
NEU3		CALB1	CNBP	B4GALT2	EEF2
NF1		CALCOCO1	CNDP2	B4GALT3	EFL1
NF2		CALCOCO2	CNEP1R1	B4GALT4	EFNA1
NFE2L1		CALD1	CNIH1	B4GALT5	EFTUD2
NFIC		CALHM2	CNIH4	B4GALT7	EGFR
NFKBIB		CALM1	CNNM2	B9D1	EHMT2
NFYC		CALR	CNNM3	B9D2	EI24
NGRN		CALU	CNNM4	BAALC-AS1	EIF1AD
NIPA2		CAMK2D	CNOT1	BAAT	EIF2A
NISCH		CAMKK2	CNOT10	BABAM1	EIF2AK4
NMT1		CAMSAP1	CNOT4	BACE1	EIF2B1
NOB1		CAMSAP2	CNOT6	BACH1	EIF2B2
NOL9		CAMTA1	CNOT9	BACH1-IT1	EIF2B4
NOP14		CAND1	CNPPD1	BACH2	EIF2D
NOTCH1		CANT1	CNPY2	BAG1	EIF2S1
NPTN		CANX	CNST	BAG5	EIF3B
NQO1		CAP1	CNTN3	BAG6	EIF3D
NR3C1		CAPG	CNTNAP1	BAHCC1	EIF3H
NRAS		CAPN1	COA1	BAHD1	EIF3K
NSD1		CAPN2	COA7	BAIAP2L1	EIF4A2
NSD2		CAPN8	COASY	BAIAP2L2	EIF4A3
NT5DC3		CAPRIN1	COBL	BANF1	EIF4E2
NTN1		CAPRIN2	COCH	BAZ1A	EIF4EBP2
NTN4		CARM1	COG1	BAZ1B	EIF4G1
NUBP2		CARS2	COG3	BAZ2A	EIF4G2
NUCB1		CASC19	COG4	BBS10	EIF5
NUCKS1		CASD1	COG8	BBS5	EIF5B
NUDCD3		CASK	COL4A3BP	BBS9	ELAC2
NUDT19		CASP2	COL7A1	BBX	ELAVL1
NUDT5		CASP8AP2	COLCA1	BCAM	ELK1
NUFIP2		CASP9	COLGALT1	BCAN	ELK4
NUMB		CAST	COMMD1	BCAP29	ELL
NUP155		CAV1	COMMD6	BCAP31	ELL2
NUP160		CBL	COPA	BCAR3	ELMO2
NUP188		CBLB	COPB2	BCDIN3D	ELMSAN1
NUP93		CBLL1	COPG1	BCKDHB	ELOC
NXF1		CBR4	COPRS	BCL10	ELOVL1
NXN		CBWD2	COPS2	BCL11A	ELOVL6
OAF		CBX5	COPS4	BCL2	ELP2
OAS3		CBX6	COPS6	BCL2L1	EMB
OGDH		CC2D1A	COPS7A	BCL2L11	EMC4
ONECUT2		CCAR2	COPS7B	BCL2L12	EMD
OSGIN1		CCDC112	COPS8	BCL2L2	EMP3
OSMR		CCDC12	COQ10B	BCL6	ENAH
OTUD4		CCDC127	COQ6	BCL7A	ENC1
P2RY2		CCDC14	COQ8A	BCL9	ENDOD1
PACSIN3		CCDC157	COQ9	BCL9L	ENOX2
PAFAH1B2		CCDC22	CORO1C	BCLAF1	ENY2
PARP1		CCDC28B	COTL1	BCOR	EP300
PARS2		CCDC51	COX10	BCORL1	EP400
PCBP1		CCDC6	COX10-AS1	BCR	EP400P1
PCGF5		CCDC66	COX15	BCS1L	EPAS1
PCLAF		CCDC71	COX19	BDH1	EPB41
PCMTD2		CCDC85C	COX4I1	BDNF-AS	EPG5
PCNX1		CCDC86	COX7A2	BDP1	EPHA2
PDCD6IP		CCDC88B	COX7C	BECN1	EPHB4
PDE12		CCDC91	COX8A	BEGAIN	EPHX1
PDE8A		CCDC93	CPB2-AS1	BET1L	EPN2
PDGFB		CCDC9B	CPD	BEX3	EPRS
PDHB		CCHCR1	CPEB2	BFAR	EPS15L1
PDLIM7		CCL22	CPNE3	BICD1	ERBB3
PDP1		CCN2	CPSF3	BICD2	ERCC1
PDS5A		CCNB1	CPSF6	BICRAL	ERCC3
PDXDC1		CCND1	CPSF7	BIN3	ERCC6
PDXK		CCND3	CPT1A	BIRC5	ERG28
PEF1		CCNDBP1	CPT2	BIRC6	ERGIC2
PERP		CCNE1	CPTP	BIVM	ERGIC3
PEX14		CCNE2	CRADD	BLCAP	ERLIN1
PFKL		CCNF	CRCP	BLMH	ERLIN2
PFN2		CCNH	CREB1	BLOC1S2	ERMP1
PHF10		CCNJ	CREB3	BLOC1S6	ERO1A
PHF12		CCNK	CREB3L2	BLVRB	ESCO2
PHF2		CCNQ	CREB3L4	BMI1	ESPL1
PHGDH		CCNT1	CREBL2	BMP2	ESRRA
PHIP		CCNY	CREBRF	BMP2K	ESYT1
PI4K2B		CCRL2	CRK	BMPR1A	ESYT2
PICALM		CCSER2	CRKL	BMPR1AP1	ETV3
PIEZO1		CCT3	CRTC2	BMPR2	EXD2
PIGU		CCT4	CRY1	BMS1	EXO1
PIP5K1A		CCT5	CRYBG3	BNIP2	EXOC5
PITPNM2		CCT5P2	CS	BNIP3L	EXOC7
PITPNM3		CCT7	CSDE1	BOD1L1	EXOSC10
PKM		CD109	CSE1L	BOLA3	EXOSC9
PKP4		CD151	CSMD1	BORA	EXPH5
PLAAT3		CD164	CSNK1D	BORCS5	EXT2
PLAGL1		CD274	CSNK1G2	BORCS7	EXTL3
PLCD3		CD276	CSNK2A1	BPHL	EZR
PLCE1		CD27-AS1	CSNK2A2	BPTF	F2RL1
PLD2		CD40	CSTF1	BRAP	FADS2
PLEC		CD44	CSTF2	BRCA1	FAF2
PLEKHO1		CD46	CSTF2T	BRCA2	FAM102A
PLP2		CD47	CTC1	BRD1	FAM104A
PLXNA1		CD58	CTCF	BRD2	FAM111B
PLXNA3		CD59	CTDSP1	BRD4	FAM114A2
PML		CD63	CTDSP2	BRD7	FAM120A
PNPO		CD81	CTDSPL	BRD7P2	FAM126B
POC1A		CD9	CTDSPL2	BRD8	FAM129B
POC5		CD99L2	CTNNA1	BRD9	FAM136A
POGZ		CDADC1	CTNNB1	BRF2	FAM160B1
POLDIP2		CDAN1	CTNNBIP1	BRI3BP	FAM160B2
POLG		CDC14B	CTNND1	BRICD5	FAM168B
POLR2A		CDC23	CTPS1	BRIP1	FAM171A1
POLR2B		CDC25B	CTSB	BRIX1	FAM171B
POLR2E		CDC27	CTTN	BRK1	FAM199X
PPA1		CDC37	CTXN1	BRMS1L	FAM201A
PPIF		CDC37L1	CUL4B	BRPF1	FAM20B
PPIL2		CDC42	CUTA	BRPF3	FAM210A
PPP1R16A		CDC42BPA	CUTALP	BSDC1	FAM217B
PPP2CA		CDC42BPB	CUTC	BSN	FAM222B
PPP2R2C		CDC42BPG	CUX1	BSN-DT	FAM53B
PPP2R5B		CDC42EP1	CWC27	BTBD10	FANCD2
PPP2R5C		CDC42EP3	CXADR	BTBD3	FANCG
PPP3R1		CDC42EP4	CYB561	BTBD6	FANCI
PPP4C		CDC42SE1	CYB561A3	BTBD7	FASN
PPP4R3A		CDC6	CYB5A	BTBD9	FASTK
PPP6R3		CDC7	CYB5R1	BTD	FASTKD2
PPRC1		CDC73	CYB5R4	BTF3	FASTKD5
PPT1		CDCA2	CYC1	BTF3L4	FAT1
PPTC7		CDCA5	CYCS	BTG1	FBRS
PQLC3		CDCA7	CYFIP1	BTG2	FBRSL1
PREB		CDCA7L	CYFIP2	BTG3	FBXL20
PREX1		CDCP1	CYHR1	BTLA	FBXL3
PRKACB		CDH1	CYP1A1	BTN2A3P	FBXL6
PRKAR2A-AS1		CDH2	CYP2U1	BTNL9	FBXO25
PRKCI		CDH3	CYREN	BUB1	FBXO32
PRKCQ		CDK1	CYTH1	BUB1B	FBXO33
PRMT1		CDK12	DAG1	BUB3	FBXO38
PROSER2		CDK16	DAP	BUD13	FBXO44
PROSER3		CDK18	DAP3	BUD23	FBXO45
PRRC2A		CDK2	DAZAP1	BVES	FBXO46
PRUNE1		CDK2AP1	DBF4	BX276092.9	FBXO7
PSAP		CDK4	DBI	BYSL	FBXW2
PSMD7		CDK5RAP1	DBN1	BZW1	FDPS
PTBP1		CDK5RAP3	DCAF11	C11orf58	FDXACB1
PTBP3		CDK6	DCAF12	C11orf68	FECH
PTDSS1		CDKL5	DCAF4	C11orf95	FEN1
PTEN		CDKN1A	DCAF5	C12orf4	FER
PTGFRN		CDKN1C	DCAF6	C12orf45	FEZ2
PTGR1		CDKN2B	DCAF8	C12orf49	FGD5-AS1
PTK2B		CDPF1	DCBLD1	C12orf65	FH
PTMS		CDS1	DCHS1	C15orf40	FITM2
PTP4A2		CDS2	DCLRE1A	C15orf41	FKBP1A
PTPN14		CEACAM5	DCLRE1B	C15orf62	FKBP1C
PTPN2P1		CEBPZOS	DCP1A	C16orf58	FKBP4
PTPRG		CELF1	DCP2	C16orf70	FKBP4P6
PTPRJ		CELSR1	DCPS	C16orf72	FKBP5
PTPRK		CELSR2	DCTN1	C17orf51	FKBP8
PTTG1IP		CELSR3	DCTN3	C17orf80	FLII
PUM2		CEMIP2	DCTN4	C18orf25	FLNB
PURB		CENPB	DCTPP1	C19orf12	FLOT2
PYCR1		CENPBD1P1	DCUN1D3	C19orf48	FLRT3
PYCR3		CENPC	DDA1	C1GALT1C1	FN3KRP
QSER1		CENPE	DDB1	C1orf112	FNBP1L
QSOX1		CENPF	DDHD2	C1orf115	FNBP4
QSOX2		CENPK	DDI2	C1orf116	FNDC3A
RAB11FIP1		CENPL	DDIAS	C1orf159	FNDC3B
RAB22A		CENPU	DDX10	C1orf198	FNTB
RAB35		CEP104	DDX17	C1orf216	FO393411.1
RAB3B		CEP135	DDX18	C1orf226	FOSL2
RAB8A		CEP152	DDX20	C1orf43	FOXA1
RAB8B		CEP170B	DDX21	C1orf52	FOXJ2
RAC1		CEP192	DDX23	C2	FOXJ3
RACK1		CEP350	DDX24	C21orf91	FOXK2
RAD18		CEP55	DDX3X	C22orf39	FOXN2
RAD21		CEP68	DDX3Y	C22orf46	FOXN3
RALGAPB		CEP85	DDX41	C2CD2L	FOXRED2
RALY		CEP85L	DDX5	C2CD3	FRMD6
RANGAP1		CEP95	DDX50	C2CD5	FRYL
RAP1GAP2		CERCAM	DDX52	C2orf42	FTL
RAPH1		CERS5	DDX6	C2orf49	FTO
RARG		CERS6	DELE1	C2orf69	FUBP1
RAVER1		CES2	DENND1B	C3orf35	FUCA1
RBFOX2		CETN2	DENND3	C4orf19	FUCA2
RBM12		CFAP410	DENND4A	C5	FUNDC1
RBM42		CFAP99	DENND4C	C5orf15	FUNDC2
RBM47		CFDP1	DERL2	C5orf22	FUS
RBMS1		CFL1	DESI1	C5orf24	FUT1
RC3H2		CFL2	DFFBP1	C5orf51	FZD3
REPIN1		CFLAR	DGAT1	C5orf56	FZD6
RERE		CGGBP1	DGAT2	C6orf120	FZD8
RHBDD2		CGN	DGCR2	C6orf132	G3BP1
RHOT2		CHAMP1	DGUOK	C6orf203	G3BP2
RHPN2		CHD3	DHCR24	C6orf226	GABPB1
RICTOR		CHD6	DHCR7	C6orf89	GALNT1
RNF114		CHD8	DHODH	C7orf25	GALNT10
RNF123		CHD9	DHRS13	C7orf61	GALNT2
RNF145		CHERP	DHRS2	C9orf16	GALNT3
RNF167		CHFR	DHRS3	C9orf78	GANC
RNF181		CHMP1A	DHRS4L2	C9orf85	GAPDH
RNF187		CHMP2A	DHRS7B	CA12	GAPDHP35
RNF216		CHMP7	DHX30	CAB39	GAPDHP72
RNF26		CHN1	DHX33	CAB39L	GARS
RNF38		CHP1	DHX38	CABLES2	GART
RNF40		CHPF	DIAPH1	CABP7	GATAD2B
RNF44		CHPF2	DIAPH2	CACNA1D	GATC
RNH1		CHRNA5	DIAPH3	CACNA2D2	GCC1
RNPEPL1		CHST11	DICER1	CACNB1	GCLM
RPL17		CHST14	DIMT1	CACNB3	GCN1
RPL30		CHST15	DIP2B	CACTIN	GDAP2
RPL31		CHST3	DIS3	CACUL1	GDI1
RPL35		CHST6	DISP1	CACYBP	GEMIN4
RPS10P5		CHSY1	DISP2	CAD	GEMIN7
RPS15A		CHUK	DLD	CADM4	GFOD2
RPS23		CHURC1	DLG3	CADPS2	GGA1
RPS25		CIART	DLG4	CALCOCO2	GGA3
RPS3		CIRBP	DLG5	CALD1	GGCX
RRP12		CIT	DLGAP4	CALHM2	GGNBP2
RSL24D1		CITED2	DLGAP5	CALM1	GID4
RTL6		CIZ1	DLST	CALM2	GIGYF1
RTL8A		CLASP1	DMD	CALU	GIT1
S100A10		CLASP2	DMXL1	CAMK2D	GLG1
SAPCD2		CLBA1	DMXL2	CAMK4	GLS
SAR1A		CLCN1	DNAJA1	CAMLG	GLUD1
SARS		CLCN3	DNAJA2	CAMSAP1	GLUL
SATB2		CLCN4	DNAJB12	CAMSAP2	GLYR1
SAYSD1		CLCN6	DNAJB14	CAMTA2	GMEB1
SBDS		CLDN12	DNAJB2	CAND1	GMFB
SBNO1		CLDN7	DNAJB4	CANT1	GMPPB
SCAF1		CLDND1	DNAJC11	CANX	GNA11
SCAMP5		CLEC16A	DNAJC13	CAP1	GNA13
SCARB1		CLIC4	DNAJC16	CAPN7	GNAI3
SCD		CLINT1	DNAJC21	CAPNS1	GNAS
SCLT1		CLIP1	DNAJC24	CAPRIN1	GNB1
SCMH1		CLIP2	DNAJC27	CAPRIN2	GNB2
SCNM1		CLIP4	DNAJC5	CAPZA1	GNL3
SCNN1A		CLMN	DNAJC7	CAPZA2	GNL3L
SDC3		CLMP	DNAJC9	CARM1	GOLGA7
SDC4		CLOCK	DNAL1	CARS	GOLPH3
SDE2		CLPP	DNM1	CARS2	GORASP2
SEC16A		CLPTM1	DNM1L	CASC2	GOT2
SEC24A		CLSPN	DNM2	CASK	GPAA1
SEC24C		CLSTN1	DNPEP	CASP2	GPAT4
SEC24D		CLSTN3	DNTTIP1	CASP3	GPATCH11
SEL1L		CLTC	DOCK4	CASP8AP2	GPATCH8
SENP2		CLTRN	DOCK5	CAST	GPBP1L1
SERBP1		CLUH	DOCK9	CASTOR3	GPHN
SERINC3		CLUHP3	DOK3	CAT	GPN3
SERP1		CMIP	DOLPP1	CBFA2T2	GPR107
SERPINE2		CMPK2	DOP1A	CBFB	GPR108
SERPINH1		CMTM3	DOP1B	CBL	GPRC5A
SERTAD2		CMTM4	DOT1L	CBLB	GPRC5C
SESN2		CMTM6	DPAGT1	CBR4	GRAMD4
SESN3		CMTR1	DPF2	CBWD1	GRB2
SETD1A		CNDP2	DPH2	CBWD2	GREB1L
SF3A1		CNGA1	DPM1	CBX1	GRHL2
SF3B1		CNIH1	DPP3	CBX2	GRN
SF3B3		CNIH4	DPP4	CBX3	GSE1
SFMBT2		CNNM1	DPY30	CBX5	GSPT1
SFPQ		CNNM3	DPYSL2	CBX6	GSR
SFT2D2		CNNM4	DQX1	CC2D1A	GSTK1
SFXN5		CNOT1	DR1	CC2D1B	GTF2A1
SH3KBP1		CNOT10	DSC2	CCAR2	GTF2A2
SHISAL1		CNOT6	DSCAM-AS1	CCDC117	GTF2E1
SIDT2		CNOT6L	DSEL	CCDC12	GTF3C4
SIMC1		CNOT9	DSG2	CCDC121	GTF3C5
SIPA1		CNPPD1	DSN1	CCDC124	GTF3C6
SIPA1L3		CNPY3	DSP	CCDC125	GTPBP2
SIVA1		CNRIP1	DSTYK	CCDC127	GTSE1
SIX1		CNTNAP1	DTD1	CCDC14	GXYLT1
SKA1		CNTROB	DTNA	CCDC144NL-AS1	H1F0
SLC12A6		COA1	DTX4	CCDC186	H2AFV
SLC16A2		COA7	DUS2	CCDC25	H2AFY
SLC16A3		COBL	DUSP1	CCDC28B	H3F3B
SLC19A1		COBLL1	DUSP10	CCDC40	H6PD
SLC1A5		COG1	DUSP23	CCDC50	HACD3
SLC23A2		COG3	DUSP28	CCDC6	HADHA
SLC25A15		COG4	DUSP4	CCDC62	HADHB
SLC25A24		COG8	DUSP5	CCDC66	HAGH
SLC25A37		COL12A1	DUSP7	CCDC71	HARS2
SLC25A39		COL18A1	DUSP8	CCDC84	HAUS2
SLC2A1		COL1A1	DVL2	CCDC85C	HBEGF
SLC30A3		COL27A1	DVL3	CCDC91	HBP1
SLC30A5		COL4A1	DYM	CCDC93	HCFC1
SLC30A7		COL4A3BP	DYNC1H1	CCL28	HCFC2
SLC30A9		COL6A1	DYNLL2	CCM2	HCN3
SLC35A1		COL6A2	DYRK1A	CCN2	HDAC2
SLC35A2		COL6A3	E2F2	CCNA2	HDAC8
SLC35A4		COL7A1	E2F3	CCNB1	HDGF
SLC35B1		COL8A1	E2F4	CCNB2	HDLBP
SLC35B2		COLGALT1	E2F8	CCNC	HEATR1
SLC35C1		COMMD1	EAF1	CCND1	HECTD1
SLC35F2		COMMD4	EBLN3P	CCND3	HECTD4
SLC35F6		COMMD6	EBNA1BP2	CCNDBP1	HELLS
SLC38A1		COMMD9	EBPL	CCNE1	HELZ
SLC38A2		COMT	ECE1	CCNE2	HERC2
SLC38A7		COPB2	ECPAS	CCNF	HEY1
SLC39A14		COPE	ECT2	CCNG1	HGS
SLC39A6		COPG1	EDC4	CCNG2	HGSNAT
SLC43A2		COPG2	EDEM1	CCNH	HHLA3
SLC44A2		COPRS	EDEM3	CCNI	HID1
SLC46A3		COPS2	EDRF1	CCNJ	HIF1AN
SLC48A1		COPS4	EEF1A1	CCNK	HINT2
SLC4A2		COPS6	EEF1A1P13	CCNQ	HIP1
SLC6A9		COPS7A	EEF1A1P17	CCNT1	HIPK2
SLC7A1		COPS7B	EEF1AKMT4	CCNT2	HIST1H3B
SLC7A6OS		COQ4	EEF1B2P3	CCNY	HIST1H4A
SLC8A1		COQ6	EEF1D	CCP110	HIST1H4B
SLC9A8		COQ8A	EEF2	CCT2	HIST1H4E
SLF2		COQ9	EFHC2	CCT3	HIVEP1
SLK		CORO1C	EFL1	CCT4	HIVEP2
SMAD2		CORO2A	EFNA1	CCT5	HK1
SMAD4		COTL1	EFNA4	CCT5P2	HLA-B
SMARCC1		COX10	EFNB2	CCT7	HLTF
SMARCC2		COX15	EFTUD2	CCT8	HM13
SMARCD1		COX4I1	EHD1	CD101	HMCES
SMC1A		COX5A	EHMT2	CD151	HMG20A
SMG1		COX7C	EI24	CD164	HMG20B
SMIM20		CPD	EID1	CD27-AS1	HMGCR
SMPDL3B		CPEB4	EIF1	CD2BP2	HMGN4
SMURF2		CPLANE1	EIF1AD	CD46	HNRNPA1
SND1		CPNE2	EIF2A	CD47	HNRNPA2B1
SNHG14		CPNE3	EIF2AK1	CD59	HNRNPL
SNHG16		CPNE8	EIF2AK3	CD63	HNRNPLL
SNHG29		CPOX	EIF2B1	CD81	HNRNPM
SNORD100		CPQ	EIF2B2	CD9	HNRNPR
SNORD11B		CPSF1	EIF2B4	CDADC1	HNRNPUL2
SNORD9		CPSF3	EIF2D	CDAN1	HOXB13
SNRNP200		CPSF4	EIF2S1	CDC14B	HP1BP3
SNRNP27		CPSF7	EIF3A	CDC23	HPGD
SNRPA		CPT1A	EIF3B	CDC25A	HRAS
SNX19		CPT1C	EIF3D	CDC25B	HS2ST1
SNX21		CPT2	EIF3E	CDC27	HSBP1
SNX33		CPTP	EIF3H	CDC37	HSD11B2
SNX8		CPVL	EIF3I	CDC37L1	HSD17B12
SNX9		CRABP2	EIF3K	CDC42	HSDL1
SOGA1		CRACR2B	EIF4A2	CDC42BPA	HSP90AB1
SON		CRAMP1	EIF4A3	CDC42BPB	HSPA1A
SORL1		CRBN	EIF4E	CDC42BPG	HSPA1B
SOX4		CREB3L2	EIF4E2	CDC42EP3	HSPA4
SP2		CREB3L4	EIF4EBP2	CDC42EP4	HSPA5
SPG7		CREBBP	EIF4G1	CDC42SE1	HSPA8
SPPL2A		CREBL2	EIF4G2	CDC42SE2	HSPA9
SPTBN2		CREBRF	EIF4G3	CDC45	HSPD1
SRC		CREG2	EIF5	CDC7	HSPH1
SREBF2		CREM	EIF5B	CDC73	HTRA2
SRGAP1		CRIM1	ELAC2	CDCA2	HTT
SRSF2		CRK	ELAVL1	CDCA7	HUWE1
SSRP1		CRKL	ELAVL2	CDCA8	HYOU1
STC1		CRNKL1	ELK1	CDH1	IARS
STC2		CROT	ELK4	CDH24	IBTK
STIL		CRTAP	ELL	CDH3	ICE1
STK24		CRTC2	ELL2	CDH6	ICK
STOM		CRY1	ELMO2	CDH7	ICMT
STRN		CRYBG1	ELMOD3	CDIPT	ID2
STT3A		CRYBG3	ELMSAN1	CDK1	IDE
STX10		CRYZ	ELOA	CDK12	IDH3A
STX18-AS1		CSDE1	ELOC	CDK13	IDH3B
SUMF2		CSE1L	ELOVL1	CDK16	IDH3G
SUN1		CSF1	ELOVL6	CDK17	IDI1
SUPT16H		CSF2	ELOVL7	CDK19	IGF2R
SUPT20H		CSK	ELP2	CDK2	IGHMBP2
SUPT3H		CSKMT	EMB	CDK20	IGSF8
SUPT6H		CSNK1A1	EMC1	CDK2AP1	IKBKB
SURF4		CSNK1D	EMC4	CDK4	IL11RA
SUV39H1		CSNK1E	EMD	CDK5R1	IL13RA1
SV2A		CSNK1G1	EML4	CDK5RAP1	IL18BP
SYMPK		CSNK1G2	EMP3	CDK5RAP2	IL6ST
SYNE2		CSNK1G3	ENAH	CDK6	ILF3
SYT7		CSNK2A1	ENC1	CDKAL1	IMP4
SYVN1		CSPG4	ENDOD1	CDKL5	IMPAD1
TAF12		CSRNP1	ENO1	CDKN1A	IMPDH1
TAF1C		CSTF1	ENOSF1	CDKN2B	IMPDH2
TALDO1		CSTF2	ENOX2	CDKN2B-AS1	INO80
TAOK3		CSTF2T	ENTPD5	CDKN2C	INO80D
TAPBP		CTC1	ENTPD7	CDO1	INPP5K
TARBP1		CTCF	ENY2	CDPF1	INSR
TAS1R3		CTDSP1	EOGT	CDS1	INTS10
TAX1BP1		CTDSP2	EP300	CDS2	INTS12
TBC1D1		CTDSPL	EP400	CDV3	INTS3
TBL1XR1		CTDSPL2	EP400P1	CDYL2	INTS5
TBL2		CTNNB1	EPAS1	CEACAM19	INTS7
TBL3		CTNNBIP1	EPB41	CEBPG	INTS8
TCF20		CTNNBL1	EPB41L4B	CEBPZOS	INTS9
TCF7L1		CTNND1	EPC2	CELF1	IP6K1
TCF7L2		CTPS1	EPG5	CELF3	IPO5
TEAD1		CTPS2	EPHA2	CELF5	IPO7
TEF		CTSB	EPHA6	CELSR1	IPO9
TEP1		CTSC	EPHB3	CELSR2	IPP
TES		CTSS	EPHB4	CELSR3	IQGAP1
TESK1		CTSZ	EPHX1	CEMIP2	IQSEC2
TEX2		CTTN	EPN2	CENPB	IRF6
TFDP2		CTU1	EPRS	CENPBD1P1	IRGQ
TFE3		CTXN1	EPS15L1	CENPE	IRS1
TGFBI		CUBN	ERBB3	CENPF	IST1
TGFBR2		CUL2	ERBB4	CENPI	ISY1
TGM2		CUL4A	ERCC3	CENPK	ITCH
THAP11		CUL4B	ERCC4	CENPL	ITFG1
THAP7-AS1		CUL5	ERG28	CENPQ	ITGAV
THAP8		CUL9	ERGIC2	CENPU	ITGB1
TIAL1		CUTA	ERGIC3	CEP104	ITGB1BP1
TICRR		CUTALP	ERI2	CEP128	ITM2B
TIMP2		CUX1	ERLIN1	CEP135	ITPK1
TJP3		CWC27	ERLIN2	CEP164	ITPKB
TKT		CXCL1	ERMP1	CEP170B	IWS1
TLN1		CXCL5	ERN1	CEP192	JADE1
TMCO3		CXCL8	ERO1A	CEP350	JADE2
TMED10		CYB561	ESCO1	CEP55	JAG2
TMEM104		CYB561A3	ESCO2	CEP57	JAK1
TMEM109		CYB561D1	ESPL1	CEP57L1	JMJD6
TMEM127		CYB5A	ESRP2	CEP70	JMY
TMEM147-AS1		CYB5R1	ESRRA	CEP76	JPH1
TMEM154		CYBRD1	ESRRB	CEP85	JPT1
TMEM161B		CYC1	ESYT1	CEP85L	JPT2
TMEM167B		CYFIP1	ETV3	CEP89	JRKL
TMEM168		CYFIP2	EVI5	CEP97	JUP
TMEM184B		CYHR1	EVI5L	CEPT1	KANK1
TMEM205		CYP19A1	EXD2	CERS2	KANSL1
TMEM214		CYP1B1	EXO1	CERS5	KARS
TMEM245		CYP27A1	EXO5	CERS6	KAT6A
TMEM254		CYP51A1P2	EXOC2	CERS6-AS1	KAT7
TMEM259		CYREN	EXOC4	CES2	KATNB1
TMEM43		CYTH1	EXOC5	CES5AP1	KBTBD4
TMEM63A		CYTH2	EXOC8	CETN2	KBTBD7
TMEM70		DAAM1	EXOSC10	CFAP44	KCTD10
TMEM98		DAD1	EXOSC9	CFAP65	KCTD2
TMOD2		DAG1	EXPH5	CFDP1	KCTD20
TMOD3		DAGLA	EXT2	CFL1	KCTD21
TMPO		DAGLB	EXTL3	CFL1P5	KCTD5
TMPO-AS1		DAP	EYA2	CFL2	KDELR1
TMPPE		DAP3	EZR	CGGBP1	KDELR2
TMX1		DAPK3	F2RL1	CGN	KDM1A
TNFAIP2		DAPP1	FAAP100	CHAF1A	KDM2A
TNFAIP8L1		DARS	FADS1	CHAMP1	KDM3B
TNFRSF1B		DAXX	FADS2	CHCHD1	KDM5A
TNRC6B		DAZAP2	FAF2	CHD2	KDM5B
TNS3		DBF4	FAM102A	CHD3	KDM5C
TOGARAM1		DBI	FAM104A	CHD6	KDSR
TOLLIP		DBN1	FAM110B	CHD7	KEAP1
TOMM20		DBNL	FAM111B	CHD8	KHDC4
TOMM7		DBT	FAM114A2	CHD9	KHDRBS1
TOR1AIP2		DCAF1	FAM117B	CHDH	KIAA0100
TOR1B		DCAF11	FAM118A	CHERP	KIAA0232
TP53		DCAF12	FAM118B	CHFR	KIAA0319L
TP53BP2		DCAF16	FAM120A	CHIC1	KIAA0513
TP73-AS1		DCAF17	FAM120B	CHL1	KIAA1109
TPP1		DCAF4	FAM122B	CHM	KIAA1191
TPT1		DCAF5	FAM126B	CHMP1A	KIAA1211
TRAM1		DCBLD1	FAM129B	CHMP2A	KIAA1549
TRAP1		DCBLD2	FAM135A	CHMP2B	KIAA1671
TRIM16L		DCHS1	FAM136A	CHMP5	KIDINS220
TRIM27		DCLRE1A	FAM160B1	CHMP7	KIF18B
TRIM28		DCLRE1B	FAM160B2	CHORDC1	KIF1B
TROAP		DCPS	FAM167B	CHP1	KIF1BP
TRRAP		DCTD	FAM168B	CHPF2	KIF1C
TRUB2		DCTN1	FAM171B	CHPT1	KIF21A
TSC1		DCTN3	FAM172A	CHRM2	KIF2A
TSC22D4		DCTN4	FAM178B	CHRM3	KIF4A
TSNAX		DCTN5	FAM189B	CHRM4	KIF5C
TSPAN4		DCTPP1	FAM199X	CHRNA2	KIF9
TSPYL4		DCUN1D3	FAM20B	CHRNA5	KIF9-AS1
TSTA3		DDA1	FAM210A	CHST11	KIFC1
TTBK2		DDAH1	FAM217B	CHST12	KLC1
TTK		DDB1	FAM221A	CHST14	KLF13
TTYH3		DDB2	FAM222B	CHST15	KLF5
TUBB		DDHD1	FAM3C2	CHST3	KLHDC10
TUBB4B		DDIAS	FAM53B	CHSY1	KLHDC3
TUFM		DDIT4	FAM57A	CHTOP	KLHDC8B
TUFT1		DDN	FAM83F	CHUK	KLHL15
TUG1		DDR1	FAM98B	CHURC1	KLHL17
TYMS		DDX10	FANCD2	CIAO3	KLHL18
UBA1		DDX17	FANCG	CIART	KLHL24
UBAC2-AS1		DDX21	FARP1	CIB1	KLHL42
UBALD2		DDX23	FARP2	CIC	KLHL9
UBAP2L		DDX24	FASN	CINP	KMT2A
UBE2C		DDX3X	FASTKD2	CIPC	KMT2B
UBE2D3		DDX41	FASTKD3	CIRBP	KMT2C
UBE2H		DDX42	FASTKD5	CIT	KMT2D
UBE2J1		DDX5	FAT1	CITED2	KMT5B
UBE2L3		DDX52	FAT4	CIZ1	KNL1
UBE3C		DDX54	FBF1	CKAP2	KNTC1
UBE3D		DDX58	FBH1	CKAP2L	KPNA2
UBN1		DDX6	FBRS	CKAP5	KPNA4
UBN2		DDX60	FBRSL1	CLASP1	KPNA6
UBP1		DEAF1	FBXL18	CLASRP	KPNB1
UBR1		DEDD2	FBXL19-AS1	CLCN3	KRR1
UBR4		DEK	FBXL20	CLCN4	KRT80
UBXN4		DELE1	FBXL3	CLCN5	KXD1
UGCG		DENND1B	FBXL4	CLCN6	LAMB2
UGGT1		DENND4A	FBXL6	CLDN12	LAMC1
UHMK1		DENND4B	FBXO21	CLDN15	LAMP1
ULK2		DENND4C	FBXO25	CLDN23	LAMP2
ULK4		DENND6A	FBXO3	CLDN7	LAMTOR2
UQCC2		DEPDC5	FBXO30	CLDND1	LAMTOR4
USP22		DERL1	FBXO32	CLEC16A	LANCL1
USP34		DERL2	FBXO33	CLIC4	LAPTM4A
USP9X		DESI1	FBXO38	CLIP1	LAPTM4B
UVSSA		DEXI	FBXO44	CLIP2	LARP1
VANGL1		DFFB	FBXO45	CLK1	LARP4
VARS		DGAT1	FBXO46	CLK3	LARS
VASP		DGAT2	FBXO7	CLMN	LARS2
VAT1		DGCR2	FBXW2	CLN6	LASP1
VCP		DGCR8	FBXW8	CLN8	LATS1
VEGFA		DGKE	FCER1G	CLOCK	LATS2
VEGFB		DGUOK	FCMR	CLPP	LCLAT1
VKORC1		DHCR24	FDFT1	CLPTM1	LCMT2
VPS26C		DHCR7	FDPS	CLPX	LCOR
VPS54		DHFR2	FDXACB1	CLSPN	LDHA
VTI1B		DHODH	FECH	CLSTN1	LDHAP1
VTN		DHRS1	FEM1C	CLTC	LDLR
WARS		DHRS3	FEN1	CLTCL1	LENG8
WASF1		DHRS4	FER	CLU	LEO1
WBP1L		DHRS4L2	FEZ2	CLUAP1	LEPROTL1
WDR24		DHRS7	FGD4	CMAS	LETM1
WDR6		DHRS7B	FGD5-AS1	CMC2	LGALS8
WDR81		DHTKD1	FGF13	CMIP	LGMN
WDR91		DHX16	FH	CMPK1	LIMS1
WDTC1		DHX29	FICD	CMPK2	LIN52
WFS1		DHX30	FITM2	CMSS1	LINC00205
WIPF2		DHX33	FKBP14	CMTM2	LINC00641
WLS		DHX34	FKBP1A	CMTM4	LITAF
WNK1		DHX35	FKBP1C	CMTM6	LMAN1
WNK4		DHX36	FKBP4	CMTM7	LMBR1L
WNT7B		DHX37	FKBP4P6	CMTR1	LMO4
WTIP		DHX38	FKBP5	CMTR2	LNPEP
WWC3		DHX40	FKTN	CMYA5	LPCAT1
XPO1		DIAPH1	FLII	CNBP	LPGAT1
XPO4		DIAPH2	FLNA	CNDP2	LPIN1
XPO6		DIAPH3	FLNB	CNEP1R1	LPIN2
XPR1		DICER1	FLOT2	CNIH1	LPP
XRCC5		DIDO1	FLRT3	CNIH4	LRATD2
YEATS2		DIP2A	FMNL2	CNKSR3	LRBA
YIPF3		DIP2B	FN1	CNN3	LRCH1
YIPF6		DIS3	FN3KRP	CNNM1	LRIG2
YKT6		DIS3L2	FNBP1L	CNNM2	LRP10
YLPM1		DISP2	FNBP4	CNNM3	LRP5
YTHDF3		DLD	FNDC3A	CNNM4	LRP6
YWHAG		DLG3	FNDC3B	CNOT1	LRPAP1
YY1		DLG5	FNTA	CNOT10	LRRC3
ZBTB17		DLGAP4	FNTB	CNOT6	LRRC37B
ZBTB38		DLGAP5	FO393411.1	CNOT6L	LRRC40
ZC3H13		DLSTP1	FOXA1	CNOT7	LRRC57
ZC3HAV1		DLX3	FOXJ2	CNOT7P1	LRRC58
ZCCHC14		DMAC2L	FOXJ3	CNOT8	LRRC59
ZCCHC2		DMPK	FOXK2	CNOT9	LRRK1
ZDHHC11		DMWD	FOXN2	CNP	LSG1
ZDHHC18		DMXL1	FOXN3	CNPPD1	LSR
ZDHHC6		DNAH10OS	FOXRED2	CNPY3	LTN1
ZDHHC8		DNAH7	FPGT	CNST	LUZP1
ZFHX3		DNAJA1	FRAS1	CNTD1	LYST
ZFP36		DNAJB1	FRMD6	CNTROB	MACF1
ZFYVE19		DNAJB2	FRS2	COA1	MAGED1
ZMIZ1		DNAJC10	FRYL	COA7	MAGT1
ZNF185		DNAJC11	FRZB	COASY	MAK16
ZNF236		DNAJC16	FTL	COBLL1	MAL2
ZNF264		DNAJC21	FTO	COG1	MALSU1
ZNF275		DNAJC24	FUCA1	COG3	MAN2A2
ZNF286A		DNAJC27	FUCA2	COG4	MAP2
ZNF318		DNAJC3	FUNDC1	COG7	MAP2K1
ZNF333		DNAJC30	FUNDC2	COG8	MAP2K2
ZNF394		DNAJC5	FUS	COL4A3BP	MAP2K3
ZNF395		DNAJC7	FUT1	COL6A1	MAP2K4
ZNF507		DNAJC9	FUT11	COL7A1	MAP2K6
ZNF609		DNAL1	FUT3	COLCA1	MAP3K1
ZNF629		DNAL4	FXR1	COLGALT1	MAP3K11
ZNF639		DNASE2	FYCO1	COMMD4	MAP3K14
ZNF664		DNM1	FZD3	COMMD6	MAP3K2
ZNF672		DNM1L	FZD6	COMMD7	MAP3K20
ZNF714		DNM2	FZD8	COMMD9	MAP3K4
ZNF765		DNM3	G2E3	COMT	MAP3K9
ZNF770		DNMT3A	G3BP1	COPB2	MAP4K3
ZNF774		DNMT3B	G3BP2	COPG1	MAP7D1
ZNF808		DNPEP	GABPB1	COPRS	MAPK14
ZPR1		DNTTIP1	GABRA3	COPS2	MAPK1IP1L
ZWILCH		DOCK4	GALNT1	COPS3	MAPK7
		DOCK5	GALNT2	COPS4	MAPKAPK2
		DOCK6	GALNT3	COPS7A	MAPKAPK3
		DOCK8	GALNT7	COPS7B	MARC1
		DOCK9	GANC	COPZ1	MARCH5
		DOK3	GAPDH	COQ10B	MARCH6
		DOP1A	GAPDHP32	COQ3	MARCKSL1
		DOP1B	GAPDHP35	COQ4	MARF1
		DPAGT1	GAPDHP55	COQ6	MARK2
		DPF2	GAPDHP72	COQ7	MARK3
		DPH2	GARS	COQ8A	MARVELD3
		DPP8	GART	COQ9	MAST2
		DPP9	GAS1	CORO1C	MBD3
		DPY30	GAS8	COTL1	MBNL1
		DPYD	GATA2-AS1	COX10	MBOAT2
		DPYSL2	GATAD2B	COX15	MBP
		DPYSL3	GATC	COX16	MBTD1
		DSC2	GCAT	COX19	MBTPS1
		DSC3	GCC1	COX4I1	MBTPS2
		DSE	GCLM	COX5B	MCL1
		DSG2	GCN1	COX6A1	MCM10
		DSN1	GDAP2	COX7A2	MCM2
		DSP	GDF11	COX7C	MCM3
		DST	GDI1	COX8A	MCM4
		DSTYK	GDPD5	CPD	MCM5
		DTD1	GEMIN4	CPE	MDH1
		DTX3L	GEMIN7	CPEB2	MDH2
		DTX4	GFOD2	CPEB3	MDM4
		DUS2	GGA1	CPEB4	MDN1
		DUSP10	GGCX	CPLANE1	MED12
		DUSP23	GGNBP2	CPLX2	MED13
		DUSP28	GGT7	CPNE2	MED13L
		DUSP3	GID4	CPNE3	MED14
		DUSP4	GIGYF1	CPNE4	MED15
		DUSP5	GIT1	CPPED1	MED21
		DUSP7	GIT2	CPSF1	MED23
		DUT	GLA	CPSF4	MED24
		DVL2	GLG1	CPSF6	MED29
		DVL3	GLO1	CPSF7	MEF2A
		DXO	GLRX	CPT1C	MEF2D
		DYNC1H1	GLRX2	CPT2	MEMO1
		DYNLL2	GLS	CPTP	MEN1
		DYNLT3	GLS2	CRAMP1	MESD
		DYRK1A	GLUD1	CRAT	METAP1
		E2F2	GLUL	CRBN	METAP2
		E2F3	GLYATL2	CRCP	METTL22
		E2F8	GLYR1	CREB1	METTL3
		EAF1	GM2A	CREB3L2	MEX3A
		EBF1	GMCL1	CREB3L4	MFHAS1
		EBLN3P	GMEB1	CREBBP	MFN2
		EBPL	GMFB	CREBL2	MFSD11
		ECE1	GMPPB	CREBRF	MFSD14B
		EDC4	GNA13	CREBZF	MFSD14C
		EDEM1	GNAI3	CREM	MFSD5
		EDEM2	GNAQ	CRIM1	MFSD9
		EDEM3	GNAS	CRK	MGAT4B
		EEF1A1P11	GNB1	CRKL	MGAT5
		EEF1A1P12	GNB2	CRNDE	MGRN1
		EEF1A1P13	GNL3	CROCCP2	MIA3
		EEF1A1P22	GNL3L	CROT	MICAL2
		EEF1AKMT2	GNPTG	CRTAP	MICAL3
		EEF1AKMT4	GOLGA4	CRTC1	MICALL1
		EEF1B2	GOLGA7	CRTC2	MICB
		EEF1B2P3	GOLGA8B	CRY1	MIDN
		EEF1D	GOLPH3	CRY2	MIEF1
		EEF2	GORASP2	CRYBG1	MIER1
		EFEMP1	GOT2	CRYBG3	MIF
		EFL1	GPAA1	CRYZ	MINDY1
		EFNA1	GPALPP1	CRYZL2P	MINK1
		EFNB1	GPAT4	CSAD	MIR183
		EFNB3	GPATCH11	CSDE1	MIR1913
		EFR3A	GPATCH2L	CSE1L	MIR23B
		EFTUD2	GPATCH8	CSKMT	MIR301A
		EGFR	GPBP1L1	CSNK1A1	MIR31
		EGLN1	GPC3	CSNK1D	MIR342
		EHD1	GPCPD1	CSNK1E	MIR424
		EHD4	GPD1	CSNK1G1	MIR4689
		EHMT2	GPD1L	CSNK1G2	MIR502
		EI24	GPHN	CSNK2A1	MIR571
		EIF1AD	GPN3	CSPG5	MIR652
		EIF2A	GPR107	CSRNP1	MKI67
		EIF2AK2	GPR108	CSRNP2	MKNK1
		EIF2AK4	GPR137	CSTF1	MKNK2
		EIF2B1	GPR158	CSTF2	MLEC
		EIF2B2	GPR83	CSTF2T	MLF2
		EIF2D	GPRC5A	CTC1	MLXIP
		EIF2S1	GPRC5C	CTCF	MMS19
		EIF3B	GPSM1	CTDSP1	MMS22L
		EIF3D	GRAMD4	CTDSP2	MOB1A
		EIF3E	GRB2	CTDSPL	MOB1B
		EIF3G	GREB1L	CTDSPL2	MOCS2
		EIF3H	GRHL2	CTNNA1	MON1B
		EIF3K	GRN	CTNNB1	MPI
		EIF4A2	GSE1	CTNNBL1	MPP2
		EIF4A3	GSK3B	CTNND1	MPRIP
		EIF4E2	GSKIP	CTNS	MPV17L2
		EIF4EBP2	GSPT1	CTPS1	MRE11
		EIF4G1	GSPT2	CTSA	MROH1
		EIF4G2	GSR	CTSB	MRPL10
		EIF4G3	GSTK1	CTSC	MRPL22
		EIF4H	GTDC1	CTSH	MRPL49
		EIF5	GTF2A2	CTSZ	MRPL9
		EIF5B	GTF2E1	CTTN	MRPS16
		ELAC2	GTF2H2C	CUEDC2	MRPS21
		ELAVL1	GTF2H3	CUL1	MRPS30
		ELF1	GTF3C4	CUL2	MRTFA
		ELF2	GTF3C5	CUL3	MRTFB
		ELF4	GTF3C6	CUL4A	MSH2
		ELFN2	GTPBP2	CUL5	MSH6
		ELK1	GTSE1	CUL9	MSI2
		ELK3	GUCY1A1	CUTA	MSL1
		ELK4	GVQW3	CUTALP	MT2A
		ELL	GXYLT1	CUTC	MTA1
		ELL2	H1F0	CUX1	MTA2
		ELMO2	H2AFY	CWC22	MTCH1
		ELMSAN1	H3F3B	CWC27	MTCO1P22
		ELOC	HACD3	CWF19L1	MTDH
		ELOVL1	HADHA	CX3CL1	MTF1
		ELOVL6	HADHB	CXADR	MTFR1
		ELP2	HAGH	CXorf38	MTG2
		EMB	HARS2	CXorf40A	MTLN
		EMC1	HAUS5	CXorf40B	MTMR1
		EMC10	HAUS8	CYB561	MTMR2
		EMC2	HAX1	CYB561A3	MTMR3
		EMC3-AS1	HBP1	CYB5A	MTMR4
		EMC4	HCFC1	CYB5R1	MTMR6
		EMC7	HCG11	CYB5R3	MTOR
		EMD	HCN3	CYC1	MTPN
		EML4	HDAC2	CYCS	MTUS1
		EMP1	HDAC8	CYFIP1	MTX3
		EMP2	HDGF	CYHR1	MUC16
		EMP3	HDLBP	CYP1B1	MVD
		ENAH	HEATR1	CYP2R1	MVK
		ENC1	HEATR5B	CYP4F29P	MVP
		ENDOD1	HECA	CYTH1	MXD3
		ENG	HECTD1	CZIB	MXD4
		ENKD1	HECTD3	DAG1	MYC
		ENO1	HECTD4	DAGLA	MYCBP2
		ENO2	HELLS	DAP3	MYCL
		ENO3	HELZ	DAPK2	MYD88
		ENO4	HERC2	DAPK3	MYH10
		ENOX2	HERC2P3	DBF4	MYH9
		ENSA	HGS	DBF4B	MYL12A
		ENTPD1-AS1	HGSNAT	DBI	MYL12B
		ENTPD4	HHLA3	DBIL5P	MYO10
		ENY2	HID1	DBNL	MYO18A
		EP300	HIF1AN	DBR1	MYO5C
		EP400	HINT2	DBT	MYO9A
		EP400P1	HIP1	DCAF1	MYRF
		EPAS1	HIPK2	DCAF10	N4BP2L2
		EPB41	HIPK3	DCAF11	NAA25
		EPB41L1	HIST1H2BD	DCAF12	NAA30
		EPB41L2	HIST1H2BN	DCAF13	NAA60
		EPC1	HIST1H3B	DCAF16	NAAA
		EPCAM	HIST1H3J	DCAF4L1	NACC1
		EPG5	HIST1H4A	DCAF5	NACC2
		EPHA1	HIST1H4B	DCAF6	NADK
		EPHA2	HIST1H4E	DCHS1	NADSYN1
		EPHB2	HIST2H2BD	DCK	NAGA
		EPHB3	HIVEP1	DCLRE1A	NANP
		EPHB4	HIVEP2	DCLRE1B	NAPA
		EPHB6	HK1	DCP1A	NAT10
		EPHX1	HLA-DMA	DCP1B	NAT9
		EPHX2	HLTF	DCP2	NAV1
		EPHX4	HM13	DCPS	NAXE
		EPN2	HMCES	DCTD	NBL1
		EPOP	HMG20B	DCTN1	NCAPD3
		EPRS	HMGB3	DCTN3	NCDN
		EPS15L1	HMGCR	DCTN4	NCK1
		ERAP1	HMGCS1	DCTN5	NCK2
		ERAP2	HMGN4	DCTPP1	NCKAP1
		ERBB3	HNRNPA1	DCUN1D1	NCKIPSD
		ERBIN	HNRNPA2B1	DCUN1D2	NCL
		ERC1	HNRNPL	DCUN1D3	NCOA2
		ERCC1	HNRNPLL	DCUN1D5	NCOA3
		ERCC2	HNRNPR	DDA1	NCOA4
		ERCC3	HNRNPU	DDAH1	NCOA6
		ERCC5	HNRNPUL1	DDB1	NCS1
		ERCC6	HNRNPUL2	DDB2	NCSTN
		ERCC6L2	HOMER2	DDHD1	NDC1
		ERG28	HOOK1	DDHD2	NDFIP2
		ERGIC1	HOOK3	DDI2	NDRG1
		ERGIC2	HOXA5	DDIAS	NDRG3
		ERGIC3	HOXB13	DDIT4	NDST1
		ERLIN1	HP1BP3	DDN	NDUFAF8
		ERMP1	HPGD	DDR1	NDUFB11
		ERN1	HPS5	DDR2	NDUFS1
		ERO1A	HRAS	DDX10	NDUFS5
		ERVK3-1	HS2ST1	DDX11	NDUFS6
		ESAM	HS3ST1	DDX11-AS1	NDUFS8
		ESCO2	HS6ST1	DDX17	NDUFV3
		ESPL1	HSBP1	DDX20	NEAT1
		ESR1	HSD11B2	DDX21	NECAP1
		ESRP1	HSD17B12	DDX23	NECTIN2
		ESRRA	HSD17B7	DDX24	NECTIN3
		ESRRG	HSDL1	DDX31	NEIL2
		ESS2	HSDL2	DDX39B	NEK7
		ESYT1	HSP90AB1	DDX3X	NELFA
		ESYT2	HSPA13	DDX3Y	NELFB
		ETV3	HSPA1A	DDX41	NEMP1
		ETV7	HSPA1B	DDX46	NET1
		EVC	HSPA4	DDX5	NEU3
		EVL	HSPA5	DDX50	NF1
		EWSR1	HSPA8	DDX54	NF2
		EXD2	HSPA8P8	DDX56	NFAT5
		EXO1	HSPA9	DDX6	NFE2L1
		EXOC2	HSPD1	DEAF1	NFIB
		EXOC3	HSPH1	DECR1	NFIC
		EXOC5	HTR7	DEK	NFKBIB
		EXOC7	HTRA2	DELE1	NFKBIZ
		EXOSC10	HTT	DENND1B	NFS1
		EXOSC2	HUWE1	DENND1C	NFX1
		EXOSC9	HYOU1	DENND2D	NFYA
		EXPH5	IARS	DENND4B	NFYC
		EXT1	IARS2	DENND4C	NGRN
		EXT2	IBA57	DENND5B	NHP2
		EXTL3	IBTK	DENND6A	NHSL1
		EYA2	ICA1	DEPDC5	NIPA2
		EZR	ICE1	DERL2	NISCH
		F11R	ICK	DESI1	NKAPD1
		F2RL1	ICMT	DET1	NME6
		FA2H	IDE	DEXI	NMT1
		FAAP20	IDH2	DFFB	NOB1
		FADS2	IDH3A	DFFBP1	NOL9
		FAF1	IDH3B	DGAT2	NOM1
		FAF2	IDH3G	DGCR2	NOP14
		FAH	IDI1	DGCR8	NOP53
		FAHD2A	IDI2-AS1	DGKD	NOP56
		FAM102A	IDNK	DGKE	NOP9
		FAM102B	IER5	DGKZ	NORAD
		FAM104A	IFT122	DGUOK	NOTCH1
		FAM111A	IFT172	DHCR24	NOTCH2
		FAM111B	IGF2R	DHCR7	NOTCH3
		FAM114A2	IGHMBP2	DHDDS	NPHP3
		FAM120A	IGSF8	DHFR	NPHP4
		FAM120AOS	IGSF9	DHODH	NPM3
		FAM126B	IKBKB	DHRS1	NPNT
		FAM129B	IL13RA1	DHRS11	NPTN
		FAM136A	IL18BP	DHRS13	NQO1
		FAM160A2	IL6ST	DHRS4L2	NQO2
		FAM160B1	ILF2	DHRS7B	NR2C2
		FAM160B2	ILF3	DHTKD1	NR3C1
		FAM167A	ILK	DHX15	NRAS
		FAM168B	ILRUN	DHX16	NRIP1
		FAM169A	IMP4	DHX29	NRTN
		FAM171A1	IMPAD1	DHX30	NSA2
		FAM177A1	IMPDH1	DHX33	NSD1
		FAM199X	IMPDH2	DHX35	NSD2
		FAM201A	INO80C	DHX36	NSD3
		FAM20B	INO80D	DHX37	NSDHL
		FAM210A	INPP5J	DHX38	NSL1
		FAM217B	INPP5K	DHX9	NSUN4
		FAM222B	INPPL1	DIABLO	NT5C2
		FAM32A	INSIG1	DIAPH1	NT5DC2
		FAM50A	INSR	DIAPH3	NT5DC3
		FAM53B	INTS10	DICER1	NUB1
		FAM81A	INTS12	DICER1-AS1	NUBP2
		FAM83H	INTS3	DIP2A	NUCB1
		FAM86EP	INTS5	DIP2B	NUCKS1
		FAM8A1	INTS7	DIP2C	NUDC
		FAM91A1	INTS8	DIS3	NUDCD3
		FAM98B	INTS9	DIS3L2	NUDT19
		FAM98C	IP6K1	DISP1	NUDT5
		FANCD2	IPO5	DLD	NUFIP2
		FANCG	IPO7	DLG4	NUMB
		FANCI	IPO9	DLG5	NUP153
		FARP1	IPP	DLGAP4	NUP155
		FASN	IPPK	DLGAP5	NUP160
		FASTK	IQCE	DLL3	NUP188
		FASTKD2	IQGAP1	DLST	NUP210
		FASTKD5	IQSEC2	DLSTP1	NUP214
		FAT1	IRAK1	DMAC2	NUP58
		FAT4	IRF1	DMAC2L	NUP62
		FAXC	IRF2BP2	DMPK	NUP93
		FBLIM1	IRF6	DMTF1	NUP98
		FBLN1	IRGQ	DMTN	NXF1
		FBN2	IRS1	DMXL1	NXPH4
		FBRS	ISG20L2	DMXL2	OAS3
		FBRSL1	IST1	DNA2	OCLN
		FBXL12	ISY1	DNAAF5	OGDH
		FBXL17	ITCH	DNAH1	OGT
		FBXL20	ITFG1	DNAH14	OIP5-AS1
		FBXL3	ITGAV	DNAJA1	ONECUT2
		FBXL6	ITGB1	DNAJA2	OPA3
		FBXO11	ITGB1BP1	DNAJB1	OSBP
		FBXO25	ITM2B	DNAJB11	OSBPL8
		FBXO31	ITPK1	DNAJB14	OTUD3
		FBXO32	ITPKB	DNAJB2	OTUD7B
		FBXO33	ITPKC	DNAJB6	OTULIN
		FBXO38	ITSN1	DNAJC10	P3H1
		FBXO41	IWS1	DNAJC11	PABPC4
		FBXO42	JADE1	DNAJC13	PAFAH1B1
		FBXO44	JAG1	DNAJC16	PAFAH1B2
		FBXO45	JAG2	DNAJC21	PAICS
		FBXO46	JAGN1	DNAJC24	PALLD
		FBXO5	JAK1	DNAJC25	PAN3
		FBXO7	JMJD6	DNAJC27	PANK3
		FBXW2	JMY	DNAJC3	PARD3
		FDPS	JPH1	DNAJC30	PARD6B
		FDXACB1	JPT1	DNAJC5	PARG
		FECH	JPT2	DNAJC7	PARP1
		FEM1A	JRKL	DNAJC8	PARP16
		FEN1	JUP	DNAJC9	PARS2
		FER	KALRN	DNAL1	PASK
		FER1L4	KANK1	DNASE1	PATL1
		FERMT1	KANSL1	DNHD1	PBRM1
		FEZ2	KARS	DNM1L	PCBD2
		FGD5-AS1	KAT2A	DNM1P46	PCBP1
		FGD6	KAT6A	DNM2	PCBP2
		FH	KAT7	DNMT1	PCBP4
		FHL1	KBTBD4	DNMT3A	PCCB
		FIGNL1	KBTBD6	DNMT3B	PCDHB2
		FITM2	KBTBD7	DNPEP	PCED1B
		FKBP1A	KCNIP4-IT1	DNTTIP1	PCGF5
		FKBP1C	KCNQ1OT1	DNTTIP2	PCLAF
		FKBP4	KCNQ5	DOCK1	PCMTD2
		FKBP4P6	KCTD10	DOCK4	PCNP
		FKBP5	KCTD2	DOCK5	PCNT
		FKBP8	KCTD20	DOCK6	PCNX1
		FLII	KCTD21	DOCK7	PCNX2
		FLNA	KCTD5	DOCK8	PCNX3
		FLNB	KCTD7	DOCK9	PCYOX1
		FLNC	KDELR1	DOHH	PDCD2
		FLOT2	KDELR2	DOK3	PDCD6IP
		FLRT3	KDF1	DOLPP1	PDE12
		FLT3LG	KDM1A	DOP1A	PDHB
		FLVCR1	KDM1B	DOP1B	PDIA4
		FMN1	KDM2A	DOT1L	PDLIM7
		FMNL1	KDM2B	DPAGT1	PDP1
		FMNL3	KDM3B	DPF2	PDP2
		FN1	KDM5A	DPH2	PDPR
		FN3KRP	KDM5B	DPH3	PDRG1
		FNBP1L	KDM5C	DPH6	PDS5A
		FNBP4	KDM6A	DPH7	PDS5B
		FNDC3A	KDSR	DPP3	PDXDC1
		FNDC3B	KEAP1	DPP8	PDXK
		FNTB	KHDRBS1	DPP9	PDZD8
		FO393411.1	KHNYN	DPY19L1	PEA15
		FOSL2	KIAA0040	DPY30	PEF1
		FOXA1	KIAA0100	DPYD	PEG10
		FOXJ2	KIAA0232	DPYSL2	PELO
		FOXK1	KIAA0319L	DPYSL3	PELP1
		FOXK2	KIAA0513	DQX1	PERP
		FOXL1	KIAA1109	DR1	PEX1
		FOXM1	KIAA1147	DRAM1	PEX13
		FOXN2	KIAA1191	DRG2	PEX14
		FOXN3	KIAA1211	DROSHA	PEX19
		FOXRED2	KIAA1217	DSC2	PEX5
		FPGS	KIAA1324	DSCAM	PFKFB2
		FRMD4A	KIAA1841	DSEL	PFKFB4
		FRMD5	KIAA1958	DSG2	PFKL
		FRMD6	KIDINS220	DSN1	PFN2
		FRS3	KIF16B	DSP	PGAP1
		FRYL	KIF18B	DST	PGM2
		FST	KIF1B	DSTN	PHACTR2
		FSTL1	KIF1BP	DSTYK	PHC3
		FTL	KIF1C	DTD1	PHF1
		FTO	KIF21A	DTNA	PHF10
		FTX	KIF2A	DTX3L	PHF12
		FUBP1	KIF3B	DTX4	PHF13
		FUCA2	KIF4A	DUS2	PHF2
		FUNDC1	KIF5C	DUSP1	PHF6
		FUNDC2	KIF9	DUSP10	PHGDH
		FUS	KIF9-AS1	DUSP22	PHIP
		FUT1	KIFC1	DUSP23	PHKB
		FUT10	KLC1	DUSP28	PI4KA
		FUT11	KLC2	DUSP3	PIAS3
		FUT3	KLF12	DUSP4	PICALM
		FUT4	KLF2	DUSP7	PIEZO1
		FUT8	KLF5	DUT	PIGC
		FZD3	KLF7	DVL2	PIGM
		FZD4	KLHDC10	DVL3	PIGS
		FZD5	KLHDC3	DXO	PIGT
		FZD6	KLHDC8B	DYNC1H1	PIGU
		FZD8	KLHL15	DYNC1LI1	PIGX
		FZR1	KLHL17	DYNC1LI2	PIK3C2B
		G3BP1	KLHL18	DYNC2H1	PIK3CA
		G3BP2	KLHL21	DYNLL1	PIK3R3
		G6PD	KLHL23	DYNLL2	PIK3R4
		GAA	KLHL24	DYRK1A	PIKFYVE
		GABBR1	KLHL28	DYRK2	PIM1
		GABPB1	KLHL36	DYRK4	PIMREG
		GABRA3	KLHL42	E2F2	PIP5K1A
		GALNT1	KLHL9	E2F3	PIP5K1C
		GALNT10	KMT2B	E2F4	PISD
		GALNT2	KMT2C	E2F8	PKD1
		GALNT3	KMT2D	EAF1	PKM
		GALNT6	KMT5B	EBLN3P	PKP3
		GALNT7	KMT5C	EBNA1BP2	PKP4
		GAN	KNL1	EBPL	PLA2G15
		GANC	KPNA2	ECE1	PLAAT3
		GAPDH	KPNA3	ECHS1	PLAGL2
		GAPDHP35	KPNA4	ECI1	PLCD3
		GAPDHP55	KPNA6	EDC4	PLCXD1
		GAPDHP72	KPNB1	EDEM1	PLD2
		GAPVD1	KRAS	EDEM3	PLEC
		GARNL3	KRR1	EDRF1	PLEKHA1
		GARS	KRT16	EED	PLEKHA5
		GART	KRT80	EEF1A1	PLEKHG3
		GAS5-AS1	KRTCAP3	EEF1A1P11	PLEKHM1
		GATAD1	KXD1	EEF1A1P13	PLEKHM2
		GATAD2B	L3MBTL2	EEF1A1P17	PLEKHO1
		GATC	LAMA3	EEF1A1P22	PLOD3
		GBP1	LAMB2	EEF1A1P8	PLPP5
		GBP1P1	LAMC1	EEF1AKMT4	PLPPR2
		GBP3	LAMP1	EEF1B2P3	PLXNA1
		GBP4	LAMP2	EEF1E1	PLXNA3
		GCA	LAMTOR4	EEF2	PLXNB2
		GCC1	LANCL1	EFCAB1	PML
		GCLC	LAPTM4A	EFCAB11	PMS2CL
		GCLM	LAPTM4B	EFCAB14	PMVK
		GCN1	LARP1	EFHC1	PNP
		GCNA	LARP4	EFHD2	PNPO
		GCNT2	LARP7	EFL1	POC5
		GDAP2	LARS	EFNA1	POFUT1
		GDE1	LARS2	EFNA4	POGK
		GDI1	LASP1	EFNB1	POGZ
		GDI2	LAT2	EFTUD2	POLD3
		GDPD5	LATS1	EGFR	POLDIP2
		GEM	LATS2	EGR1	POLE
		GEMIN4	LBR	EHMT1	POLG
		GEMIN5	LCLAT1	EHMT2	POLQ
		GEMIN7	LDB1	EI24	POLR1B
		GEMIN8	LDHA	EID1	POLR1E
		GFOD1	LDHAP1	EID2B	POLR2A
		GFOD2	LDHC	EIF1	POLR2B
		GGA1	LDLR	EIF1AD	POLR2C
		GGA2	LDLRAD3	EIF1AX	POLR2E
		GGA3	LENG8	EIF2A	POLR3D
		GGCX	LEO1	EIF2AK1	POLR3E
		GGNBP2	LEPROTL1	EIF2AK2	POLR3H
		GHET1	LETM1	EIF2AK3	POMK
		GHITM	LGALS3	EIF2AK4	POP1
		GID4	LGALS8	EIF2B1	POP7
		GIGYF1	LGMN	EIF2B2	POR
		GIN1	LGR4	EIF2B4	PORCN
		GINS3	LHFPL2	EIF2D	POU2F1
		GINS4	LIFR	EIF2S1	PPARA
		GIT1	LIMS1	EIF3B	PPFIBP1
		GIT2	LIN28A	EIF3D	PPHLN1
		GJC1	LIN52	EIF3H	PPIB
		GK5	LINC00205	EIF3K	PPIF
		GLB1L2	LINC00632	EIF3L	PPIL2
		GLG1	LINC00641	EIF3M	PPIP5K2
		GLI3	LINC00665	EIF4A1	PPME1
		GLIS3	LINC00689	EIF4A1P7	PPP1CA
		GLMP	LINC00847	EIF4A2	PPP1CB
		GLP2R	LINC00888	EIF4A3	PPP1CC
		GLS	LINC01278	EIF4E	PPP1R12A
		GLUD1	LINC01578	EIF4E2	PPP1R16A
		GLUL	LINC01619	EIF4EBP2	PPP1R8
		GLYR1	LINC01963	EIF4G1	PPP1R9A
		GM2A	LINC02389	EIF4G2	PPP2CA
		GMEB1	LITAF	EIF5	PPP2R2C
		GMEB2	LMAN1	EIF5A	PPP2R2D
		GMFB	LMBR1L	EIF5B	PPP2R5C
		GMPPB	LMO4	ELAC2	PPP2R5E
		GNA11	LNPEP	ELAVL1	PPP3CA
		GNA13	LPCAT1	ELAVL2	PPP3R1
		GNAI3	LPCAT3	ELF1	PPP4C
		GNAS	LPGAT1	ELF4	PPP4R2
		GNB1	LPIN1	ELK1	PPP4R3A
		GNB2	LPIN2	ELK3	PPP5C
		GNL3	LPL	ELK4	PPP6R3
		GNL3L	LPP	ELL	PPRC1
		GNPDA2	LRATD2	ELL2	PPT1
		GNPTAB	LRBA	ELMO2	PPTC7
		GOLGA7	LRCH1	ELMSAN1	PRCP
		GOLGA8B	LRFN1	ELOA	PRDM2
		GOLPH3	LRIG1	ELOC	PRDM4
		GON4L	LRIG2	ELOF1	PRDX6
		GORASP1	LRP10	ELOVL1	PREB
		GORASP2	LRP3	ELOVL2	PRKAB2
		GOSR2	LRP5	ELOVL6	PRKACA
		GOT1	LRP5L	ELP2	PRKACB
		GOT2	LRP6	EMB	PRKAR1A
		GPAA1	LRPAP1	EMC10	PRKAR2A
		GPAM	LRRC1	EMC2	PRKCE
		GPAT4	LRRC28	EMC3	PRKCI
		GPATCH11	LRRC3	EMC3-AS1	PRKDC
		GPATCH8	LRRC37B	EMC4	PRMT1
		GPBP1L1	LRRC40	EMC7	PRNP
		GPC4	LRRC41	EMD	PROM2
		GPC6	LRRC47	EMG1	PROSER2
		GPD2	LRRC57	EMP2	PRPF3
		GPHN	LRRC58	EMP3	PRPF38A
		GPN3	LRRC59	EMSY	PRPF39
		GPR107	LRRFIP2	ENAH	PRPF4B
		GPR108	LRRN1	ENC1	PRPF8
		GPR137	LSG1	ENDOD1	PRR13
		GPR137B	LSM3	ENHO	PRR14L
		GPR180	LSR	ENKD1	PRRC1
		GPR3	LSS	ENO2	PRRC2A
		GPRC5A	LTA4H	ENO3	PRRC2B
		GPRC5C	LTB4R	ENOX2	PRRC2C
		GPRIN2	LTN1	ENSA	PRRG1
		GPSM2	LUC7L3	ENTPD4	PRRG4
		GPX2	LUZP1	ENTPD5	PRUNE1
		GRAMD4	LYRM7	ENTPD7	PSAP
		GRB14	LYST	ENTR1	PSAT1
		GRB2	LZTR1	ENY2	PSEN1
		GREB1L	MACC1	EP300	PSKH1
		GREM1	MACF1	EP400	PSMA3
		GRHL2	MACO1	EP400P1	PSMA4
		GRINA	MACROD2	EPB41	PSMA5
		GRN	MAFB	EPB41L1	PSMB1
		GSAP	MAFK	EPB41L5	PSMB6
		GSE1	MAGED1	EPC1	PSMC4
		GSKIP	MAGT1	EPG5	PSMD1
		GSN	MAK16	EPHA2	PSMD11
		GSPT1	MAL2	EPHA6	PSMD2
		GSPT2	MALAT1	EPHA7	PSMD4
		GSR	MALSU1	EPHB4	PSMD7
		GSTK1	MAML2	EPHX1	PSME2
		GSTM3	MAP1S	EPHX2	PSME4
		GTF2A1	MAP2	EPM2AIP1	PSMF1
		GTF2A2	MAP2K1	EPN1	PTBP1
		GTF2E1	MAP2K2	EPN2	PTBP3
		GTF2H1	MAP2K3	EPOP	PTCD1
		GTF2H2C	MAP2K4	EPPK1	PTCD2
		GTF2H5	MAP2K6	EPRS	PTCH1
		GTF2IP13	MAP3K11	EPS15L1	PTDSS1
		GTF2IRD1	MAP3K13	ERAL1	PTEN
		GTF3C2	MAP3K2	ERBB3	PTGFRN
		GTF3C4	MAP3K4	ERC1	PTGR1
		GTF3C5	MAP3K9	ERCC1	PTK2B
		GTF3C6	MAP4K3	ERCC3	PTMS
		GTPBP2	MAP4K4	ERCC4	PTP4A2
		GTSE1	MAP7D1	ERCC5	PTPN1
		GUCD1	MAPK1	ERCC6	PTPN11
		GUCY1A1	MAPK14	ERCC6L	PTPN12
		GUSB	MAPK1IP1L	ERG28	PTPN14
		GXYLT1	MAPK6	ERGIC1	PTPRJ
		GXYLT2	MAPK7	ERGIC2	PTPRK
		GYS1	MAPKAPK2	ERGIC3	PTPRU
		GZF1	MAPKAPK3	ERI1	PTTG1IP
		H1F0	MARC1	ERLIN1	PUM2
		H2AFV	MARCH5	ERLIN2	PURB
		H2AFY	MARCH6	ERMP1	PUS7L
		H2AFZ	MARCH7	ERP29	PVR
		H3F3B	MARCH8	ERVK9-11	PWWP3A
		H6PD	MARCKSL1	ESCO2	PXDC1
		HACD1	MARK2	ESPL1	PYCR1
		HACD3	MARK3	ESRP1	PYCR3
		HADHA	MARS2	ESRRA	PYGO2
		HADHB	MARVELD1	ESYT1	QPCTL
		HAGH	MARVELD3	ESYT2	QSER1
		HAL	MAST2	ETAA1	QSOX1
		HARS	MATR3	ETFDH	QSOX2
		HARS2	MBD1	ETNK1	RAB10
		HAS3	MBD3	ETV1	RAB11A
		HAUS2	MBNL1	ETV3	RAB11FIP1
		HBEGF	MBOAT2	EVA1C	RAB11FIP2
		HBP1	MBP	EXD2	RAB11FIP5
		HBS1L	MBTD1	EXO1	RAB15
		HCAR1	MBTPS1	EXO5	RAB21
		HCFC1	MBTPS2	EXOC4	RAB22A
		HCFC1R1	MCL1	EXOC5	RAB35
		HCFC2	MCM10	EXOC6B	RAB3B
		HCG11	MCM2	EXOC7	RAB3GAP2
		HCG27	MCM3	EXOC8	RAB8A
		HCLS1	MCM4	EXOG	RABEP1
		HCN3	MCM5	EXOSC10	RABGGTA
		HDAC3	MCMBP	EXOSC2	RABGGTB
		HDAC5	MCUB	EXOSC3	RAC1
		HDAC6	MDH1	EXOSC9	RACGAP1
		HDAC7	MDH2	EXPH5	RACK1
		HDAC8	MDM2	EXT2	RAD18
		HDDC2	MDM4	EXTL3	RAD21
		HDGF	MDN1	EZH1	RAD23B
		HDHD2	MED1	EZH2	RAE1
		HDLBP	MED11	EZR	RALGAPA2
		HEATR1	MED12	F11R	RALGAPB
		HEATR5A	MED13	F2RL1	RALY
		HEATR6	MED13L	FADS2	RANBP1
		HEBP2	MED14	FAF1	RANBP3
		HECTD1	MED21	FAF2	RANBP6
		HECTD3	MED23	FAH	RANGAP1
		HECTD4	MED24	FAHD2A	RANGRF
		HEG1	MED28	FAM102A	RAP1GAP2
		HELB	MED29	FAM104A	RAPH1
		HELQ	MEF2D	FAM104B	RARA
		HELZ	MEGF9	FAM110B	RARG
		HERC1	MELK	FAM111A	RBBP4
		HERC2	MEN1	FAM111B	RBBP5
		HERC6	MESD	FAM114A2	RBCK1
		HERPUD1	METAP1	FAM117B	RBFOX2
		HERPUD2	METAP2	FAM118B	RBM12
		HES1	METTL14	FAM120A	RBM12B
		HES2	METTL22	FAM120AOS	RBM15-AS1
		HES4	METTL3	FAM120B	RBM22
		HEY1	METTL8	FAM122B	RBM3
		HGS	MEX3A	FAM126A	RBM42
		HGSNAT	MEX3C	FAM126B	RBM47
		HHLA3	MFAP3	FAM129B	RBM8A
		HID1	MFF	FAM135A	RBMXL1
		HIF1AN	MFN2	FAM136A	RBSN
		HINT2	MFSD14B	FAM13B	RBX1
		HIP1	MFSD4A	FAM155B	RC3H1
		HIPK2	MFSD5	FAM160A2	RC3H2
		HIST1H2AI	MFSD6	FAM160B1	RCAN3
		HIST1H2AJ	MFSD9	FAM160B2	RCC1
		HIST1H2BD	MGARP	FAM168A	RCE1
		HIST1H3B	MGAT4B	FAM168B	RCHY1
		HIST1H3J	MGAT5	FAM169A	RCN2
		HIST1H4B	MGRN1	FAM171A1	RDH11
		HIST1H4E	MGST2	FAM171B	RDX
		HIVEP2	MGST3	FAM177A1	REEP5
		HIVEP3	MIA3	FAM199X	REPIN1
		HK1	MIB1	FAM201A	REPS1
		HK2	MICAL1	FAM20B	RERE
		HLA-A	MICAL2	FAM210A	RETSAT
		HLA-B	MICAL3	FAM217B	REV1
		HLA-DMA	MICU1	FAM218A	RFC3
		HLA-E	MIDN	FAM222B	RGL3
		HLA-F	MIEF1	FAM229A	RGMB
		HLCS	MIER1	FAM234B	RGP1
		HLTF	MIER3	FAM241A	RGS2
		HM13	MIF	FAM53B	RGS3
		HMCES	MIGA1	FAM53C	RHBDD2
		HMCN1	MINDY1	FAM57A	RHOA
		HMG20A	MINDY2	FAM57B	RHOB
		HMG20B	MINK1	FAM76A	RHOT2
		HMGA2	MIOS	FAM83F	RHOV
		HMGB3	MIR132	FAM8A1	RHPN2
		HMGCR	MIR182	FAM91A1	RIMKLA
		HMGN4	MIR183	FAM98C	RIOK2
		HMGXB3	MIR23B	FANCB	RIPK2
		HNRNPA0	MIR301A	FANCC	RIPK4
		HNRNPA1	MIR301B	FANCD2	RIPOR1
		HNRNPA1L2	MIR31	FANCG	RITA1
		HNRNPA2B1	MIR340	FANCI	RNF10
		HNRNPA3	MIR342	FAR1	RNF114
		HNRNPA3P6	MIR3936HG	FAR2	RNF123
		HNRNPH3	MIR424	FARP2	RNF141
		HNRNPK	MIR4453HG	FARSB	RNF144B
		HNRNPKP2	MIR454	FAS	RNF145
		HNRNPKP4	MIR4689	FASN	RNF167
		HNRNPL	MIR5008	FASTK	RNF181
		HNRNPLL	MIR502	FASTKD2	RNF187
		HNRNPM	MIR532	FASTKD3	RNF19A
		HNRNPR	MIR556	FASTKD5	RNF216
		HOMER1	MIR571	FAT1	RNF26
		HOTTIP	MIR598	FBF1	RNF34
		HOXA10-AS	MIR652	FBH1	RNF38
		HOXB2	MIR6757	FBLN1	RNF4
		HOXB6	MIR6814	FBLN7	RNF40
		HOXB9	MIR6893	FBRS	RNF44
		HP1BP3	MIRLET7I	FBRSL1	RNGTT
		HPCAL1	MKI67	FBXL19-AS1	RNH1
		HPGD	MKNK2	FBXL20	RNMT
		HPS1	MKRN1	FBXL3	RNPEPL1
		HPS3	MLEC	FBXL4	RNVU1-15
		HPS4	MLF2	FBXL5	RO60
		HPSE	MLXIP	FBXL6	RPF1
		HRAS	MMD	FBXO11	RPL14
		HS1BP3	MMP15	FBXO21	RPL17
		HS2ST1	MMS19	FBXO24	RPL22
		HSBP1	MMS22L	FBXO25	RPL27
		HSD11B2	MMUT	FBXO28	RPL30
		HSD17B12	MOAP1	FBXO3	RPL31
		HSD3B7	MOB1A	FBXO30	RPL32
		HSP90AA1	MOB1B	FBXO31	RPL34
		HSP90AB1	MOCOS	FBXO32	RPL35
		HSPA1A	MOCS2	FBXO33	RPL37
		HSPA4	MON1A	FBXO38	RPL37A
		HSPA5	MON1B	FBXO44	RPP38
		HSPA8	MORC2	FBXO45	RPRD1A
		HSPA9	MORC3	FBXO46	RPRD1B
		HSPD1	MPC1	FBXO5	RPS10P5
		HSPG2	MPI	FBXO7	RPS11
		HSPH1	MPP6	FBXO9	RPS14
		HTATSF1	MPPE1	FBXW2	RPS15A
		HTRA1	MPRIP	FBXW5	RPS18
		HTRA2	MPV17L2	FBXW7	RPS23
		HTT	MPZL1	FBXW8	RPS23P8
		HUWE1	MRE11	FCER1G	RPS3
		HYAL1	MRI1	FCGBP	RPS5
		HYAL2	MROH1	FCHO2	RPS6KA3
		HYAL3	MRPL1	FCHSD2	RPS6KB2
		HYOU1	MRPL10	FDFT1	RPS6KC1
		HYPK	MRPL19	FDPS	RPS6KL1
		IARS	MRPL20-AS1	FDXACB1	RPS7
		IBTK	MRPL22	FECH	RPS7P1
		ICAM1	MRPL37	FEM1A	RPSA
		ICE1	MRPL42	FEM1C	RRBP1
		ICE2P1	MRPL48	FEN1	RRM1
		ICK	MRPL49	FEN1P1	RRN3
		ICMT	MRPL50	FER	RRP12
		ID2	MRPL9	FEZ2	RRP36
		IDE	MRPS16	FGD5-AS1	RSF1
		IDH3A	MRPS21	FGD6	RSL24D1
		IDH3B	MRPS30	FGFR1	RTKN
		IDH3G	MRS2	FGFR1OP2	RTL6
		IFFO2	MRTFA	FGGY	RTL8A
		IFI27	MRTFB	FH	RTN3
		IFI27L2	MSANTD2	FHDC1	RTN4
		IFI44	MSH2	FIBIN	RUFY1
		IFI44L	MSH6	FICD	RYBP
		IFIH1	MSI2	FIGNL1	S100A10
		IFIT2	MSL1	FITM2	S100A11
		IFIT5	MSMO1	FKBP14	S1PR3
		IFT172	MT2A	FKBP1A	SAAL1
		IFT88	MTA1	FKBP1C	SACS
		IGDCC4	MTA2	FKBP4	SAFB
		IGF1R	MTAP	FKBP4P6	SAP18
		IGF2BP2	MTCH1	FKBP5	SAP30BP
		IGF2R	MTCO1P22	FKBP8	SAP30L
		IGFBP6	MTDH	FLG-AS1	SAR1A
		IGHMBP2	MTERF4	FLII	SARS
		IGSF3	MTF1	FLNB	SAT1
		IGSF8	MTFMT	FLOT2	SAYSD1
		IGSF9	MTFR1	FLRT3	SBDS
		IK	MTG2	FLVCR1	SBNO1
		IKBKB	MTHFR	FN3KRP	SC5D
		IL11RA	MTLN	FNBP1	SCAMP5
		IL13RA1	MTMR10	FNBP1L	SCAP
		IL15	MTMR14	FNBP4	SCARB2
		IL17RD	MTMR2	FNDC3A	SCD
		IL18BP	MTMR3	FNDC3B	SCMH1
		IL18R1	MTMR4	FNIP1	SCNM1
		IL6ST	MTMR6	FNTA	SCO2
		ILF3	MTMR9	FNTB	SCYL1
		ILRUN	MTO1	FO393411.1	SDC3
		IMMT	MTOR	FOS	SDC4
		IMP4	MTPN	FOSB	SDE2
		IMPAD1	MTUS1	FOSL2	SDHB
		IMPDH1	MTX1	FOXA1	SEC11A
		IMPDH1P10	MTX3	FOXJ2	SEC14L1
		IMPDH2	MUC16	FOXJ3	SEC16A
		INAVA	MUC3A	FOXK1	SEC22A
		INCENP	MUC5B	FOXK2	SEC23A
[truncated: 4,001 more rows]

## Sheet: Supplementary Table S3
Gene	Spearman r2	p-value		mRNA transcripts negatively correlated to miR-183-5p in PRAD-TCGA tumor tissues
ASB15	-0.0839278	0.0499869
QRICH1	-0.0839867	0.049826
TPPP	-0.0840364	0.0496902
BAG2	-0.0841018	0.0495122
POLR2J3	-0.084109	0.0494926
LOC646762	-0.0841344	0.0494238
CAPN11	-0.0841426	0.0494014
CRISP1	-0.0841547	0.0493686
FIGLA	-0.084232	0.0491596
ZNF609	-0.0842332	0.0491563
APOH	-0.0842376	0.0491445
EFCAB7	-0.0842515	0.0491068
NOX1	-0.0842568	0.0490926
HBQ1	-0.0842888	0.0490064
UBAC1	-0.0844087	0.0486841
ERMAP	-0.0844241	0.0486429
KLF3	-0.084451	0.0485711
LILRA5	-0.084475	0.0485068
UGT3A2	-0.0844816	0.0484892
HYMAI	-0.0844949	0.0484537
SAMD3	-0.0846805	0.0479607
KLHL22	-0.0846951	0.0479221
RIC8B	-0.0847164	0.0478658
AMAC1	-0.0847257	0.0478412
DVWA	-0.0847673	0.0477314
IYD	-0.0847797	0.0476988
HSD17B8	-0.0847879	0.0476772
LOC387647	-0.0847956	0.0476568
DBNL	-0.084848	0.047519
FGGY	-0.0848575	0.0474943
LOC26102	-0.0848679	0.047467
TMEFF1	-0.0849063	0.0473663
AMTN	-0.0849619	0.0472208
STK17B	-0.0849869	0.0471556
CXorf41	-0.0849927	0.0471405
EP400	-0.085005	0.0471085
GBE1	-0.0850614	0.0469617
RAB7A	-0.0850971	0.0468688
MYH6	-0.0850985	0.0468653
NBPF10	-0.0851294	0.0467851
UIMC1	-0.085146	0.0467423
SPG11	-0.0852043	0.0465913
PFN1	-0.0852506	0.0464721
GLYR1	-0.0852664	0.0464313
C13orf1	-0.0853055	0.0463307
IL31RA	-0.0853613	0.0461875
RPL23AP7	-0.0853889	0.0461167
RBPJL	-0.0854051	0.0460753
DDR1	-0.0854658	0.0459204
SGK196	-0.0855138	0.0457979
LMBRD2	-0.0855171	0.0457894
USP35	-0.0855195	0.0457834
BEND7	-0.0855881	0.0456091
ACSF3	-0.0856598	0.0454276
TBCCD1	-0.0856906	0.0453498
TAOK3	-0.0857369	0.045233
PLXNA1	-0.0857524	0.045194
ALDH1L1	-0.0857703	0.045149
OR5P2	-0.0857787	0.0451279
FXYD3	-0.0857815	0.0451208
SEMG2	-0.0857929	0.0450921
NAV1	-0.0857988	0.0450774
PCDHGA4	-0.0858444	0.044963
AGAP5	-0.0858468	0.0449569
ZDHHC17	-0.0858572	0.044931
FRAS1	-0.085874	0.0448887
DUSP23	-0.0860339	0.0444902
VCX3B	-0.0860504	0.0444491
BHLHE41	-0.0860544	0.0444391
FAM83D	-0.0860564	0.0444344
VSTM2A	-0.086081	0.0443733
PRIM2	-0.0860952	0.0443381
ODF3B	-0.086103	0.0443189
SUGT1L1	-0.0861131	0.0442937
TNNI2	-0.0861587	0.0441812
TSTD2	-0.0863323	0.0437541
BIRC6	-0.0864324	0.0435096
XPR1	-0.0864338	0.043506
BAZ1B	-0.0864353	0.0435024
TMEM14A	-0.0864458	0.0434767
SAG	-0.0864697	0.0434186
OAS2	-0.0864836	0.0433849
NLRP6	-0.0865424	0.043242
NOL9	-0.0865548	0.0432119
BMP8B	-0.0866247	0.0430428
INSL6	-0.0867112	0.0428342
CCNYL1	-0.0867277	0.0427947
GBP5	-0.0867683	0.0426971
PI4KA	-0.0867764	0.0426776
SLC35C1	-0.0868014	0.0426177
CRISPLD1	-0.0868077	0.0426025
RAB35	-0.0868155	0.042584
LOC348840	-0.0868241	0.0425634
C9orf9	-0.0868364	0.042534
HAPLN1	-0.0868705	0.0424526
CDH10	-0.086885	0.0424178
WDR76	-0.0869034	0.0423739
GOSR2	-0.0869298	0.0423112
MEP1B	-0.0869358	0.0422969
GMIP	-0.0869609	0.042237
HSPB3	-0.0869836	0.0421831
CLECL1	-0.0869994	0.0421456
RAB3IL1	-0.0870239	0.0420874
OR10G2	-0.087031	0.0420706
TCTN2	-0.0870538	0.0420168
SLC22A5	-0.0870569	0.0420093
OTOF	-0.0871044	0.0418971
PRMT10	-0.0871175	0.0418662
TMSL3	-0.0871447	0.0418021
FOXA2	-0.0871795	0.0417201
HDAC7	-0.0871795	0.04172
TSKS	-0.0871803	0.0417182
PLA2G4F	-0.0872561	0.0415401
RBP2	-0.0872593	0.0415326
POTEE	-0.0872807	0.0414825
RFX5	-0.0872872	0.0414673
OR52D1	-0.0873086	0.0414173
KCNA10	-0.087363	0.0412901
LTK	-0.0874337	0.0411255
SEPT9	-0.0874848	0.041007
ARRDC4	-0.0875017	0.0409677
STAM2	-0.0875141	0.040939
TNNT2	-0.0875154	0.040936
SLC22A8	-0.0875499	0.0408562
PARVG	-0.0875528	0.0408494
CYP51A1	-0.0875539	0.0408469
CHGB	-0.0876003	0.0407397
ANKRD1	-0.0876248	0.0406833
POU3F3	-0.0876557	0.0406121
RPRD2	-0.0876676	0.0405849
ARHGAP17	-0.0877098	0.0404878
RBM11	-0.0877221	0.0404598
CSAG2	-0.0877252	0.0404527
LOC441455	-0.0877944	0.0402943
S100A7A	-0.0878112	0.0402559
C3orf20	-0.0878893	0.0400779
MEG8	-0.0879473	0.0399462
NCF2	-0.0879538	0.0399314
IL17REL	-0.0879595	0.0399185
B3GNT1	-0.0879671	0.0399012
ANKRD26P1	-0.087972	0.0398901
FRMD8	-0.0880644	0.0396812
MYO1E	-0.0880644	0.0396812
EP300	-0.0880689	0.0396711
PCDHGB5	-0.0880767	0.0396534
OR1J4	-0.0881087	0.0395814
CTNNA1	-0.0881235	0.0395482
TJP3	-0.0881309	0.0395315
PGA4	-0.0881573	0.0394722
GP1BA	-0.088162	0.0394616
DAAM1	-0.0882078	0.0393589
ERLIN2	-0.088249	0.0392669
C1orf105	-0.0882496	0.0392655
CASC3	-0.0882698	0.0392204
LY96	-0.0883091	0.0391326
LOC392196	-0.0883466	0.039049
DNAH7	-0.088376	0.0389838
ZMAT2	-0.0883903	0.038952
LOC145783	-0.0884303	0.0388632
MYCNOS	-0.0884679	0.0387801
SERPINB4	-0.0884903	0.0387306
XKR6	-0.0885143	0.0386774
STX8	-0.0885153	0.0386752
LOC550112	-0.0885294	0.0386442
EDDM3A	-0.0885305	0.0386417
LOR	-0.0885486	0.0386018
DBF4B	-0.0886569	0.0383639
USH1G	-0.0886899	0.0382915
TCL1B	-0.0886962	0.0382777
KDM5D	-0.0887545	0.0381505
FNDC7	-0.0888254	0.037996
IQCF6	-0.088834	0.0379773
DGCR8	-0.08891	0.0378124
MLXIPL	-0.0889321	0.0377647
IGF2BP1	-0.0889669	0.0376895
MAB21L2	-0.0889755	0.0376709
LYSMD4	-0.0890217	0.0375712
BAZ2B	-0.0890809	0.0374441
PPP1R15B	-0.0890946	0.0374147
LDLRAD1	-0.0891661	0.0372615
ZCWPW2	-0.089176	0.0372402
TRIM15	-0.0891864	0.037218
LOC728276	-0.0892404	0.0371029
SYPL1	-0.0892412	0.0371011
ZNF296	-0.0893666	0.0368348
DIDO1	-0.0893696	0.0368285
TNMD	-0.0893839	0.0367981
DDX50	-0.0893979	0.0367687
SPOCK2	-0.089451	0.0366566
KRT79	-0.0895573	0.036433
ZNF684	-0.0895823	0.0363804
TGM6	-0.0896193	0.0363029
KIAA1908	-0.0896373	0.0362653
VCAN	-0.0896739	0.036189
CD6	-0.0897552	0.0360197
ROM1	-0.0897894	0.0359487
FAM78A	-0.0898326	0.0358593
ZC3H10	-0.0898374	0.0358493
TSPAN16	-0.0898868	0.0357473
KIF16B	-0.0899	0.03572
UBC	-0.089908	0.0357034
C6orf162	-0.0899214	0.0356759
ACTL7B	-0.0899396	0.0356384
C10orf12	-0.0900212	0.0354707
C22orf45	-0.0900348	0.0354429
DYNLL2	-0.0901274	0.0352534
FBXL20	-0.090161	0.035185
MUTED	-0.0901969	0.035112
LMX1A	-0.0902305	0.0350437
PCOTH	-0.0902388	0.0350268
TCTA	-0.0902983	0.0349063
LOC100133050	-0.090331	0.0348403
NOV	-0.0903805	0.0347403
CCDC30	-0.0903911	0.0347191
FMR1	-0.0904633	0.0345739
CDH8	-0.0904675	0.0345654
MED13L	-0.090489	0.0345224
TREML2	-0.0905173	0.0344657
PLS1	-0.0905318	0.0344367
BACE2	-0.0905463	0.0344078
DEFB131	-0.0905878	0.034325
ANKRD30A	-0.0906181	0.0342646
CYP3A43	-0.090627	0.0342468
AP2M1	-0.0906276	0.0342455
CDYL	-0.0906296	0.0342417
GRB2	-0.0906342	0.0342324
C8orf48	-0.0906358	0.0342292
RG9MTD3	-0.0907017	0.0340985
BRPF1	-0.090709	0.034084
OCA2	-0.0907094	0.0340831
ULK4	-0.0907122	0.0340776
LOC150527	-0.0907204	0.0340613
EPHB4	-0.0907519	0.033999
NHEG1	-0.0909135	0.0336805
OR2A9P	-0.0909291	0.03365
ZNF816A	-0.090935	0.0336385
TMEM188	-0.0909376	0.0336334
REEP5	-0.0909646	0.0335804
SP4	-0.0909689	0.033572
MYCL1	-0.0910098	0.0334921
APOOL	-0.0910216	0.0334692
PTPN1	-0.0910664	0.0333817
ZNF496	-0.0911141	0.0332889
C18orf8	-0.0911256	0.0332666
CTNNBL1	-0.0911458	0.0332275
TMEM8C	-0.0911543	0.0332109
FAM3B	-0.0911594	0.0332011
GPKOW	-0.0911811	0.0331591
OR2T2	-0.0911828	0.0331558
RHOV	-0.0912179	0.0330879
CCDC97	-0.0912345	0.0330558
C9orf4	-0.0912821	0.032964
PCDHGA7	-0.0912853	0.0329577
TERF2	-0.0912988	0.0329318
CAV3	-0.0913082	0.0329137
SERPINA10	-0.0913245	0.0328824
RSBN1L	-0.0913305	0.0328709
PSD	-0.0914447	0.032652
SOX18	-0.0914636	0.0326159
RAB5B	-0.0914901	0.0325653
RSPH3	-0.0915117	0.0325241
INA	-0.0915186	0.0325111
RAD9B	-0.0915233	0.0325021
SLC32A1	-0.0915345	0.0324808
RPAP1	-0.0915458	0.0324593
FBXO8	-0.0916191	0.0323202
NDC80	-0.0916834	0.0321985
ADAM6	-0.0916976	0.0321718
HDX	-0.0917313	0.0321082
DNAJB13	-0.0917467	0.0320792
KDM2A	-0.0917686	0.0320381
EXOSC6	-0.0918341	0.0319151
FOXB2	-0.0918864	0.0318172
ST8SIA6	-0.0919437	0.0317103
NNMT	-0.0919443	0.0317092
MS4A3	-0.0919584	0.031683
LOC100271836	-0.0919904	0.0316235
LRRC3	-0.091996	0.0316129
GPR4	-0.0920083	0.0315902
PCDHA10	-0.0920207	0.031567
C20orf165	-0.0920628	0.0314891
LSM6	-0.0922237	0.0311922
MFHAS1	-0.0922321	0.0311767
FAM167B	-0.0922384	0.0311651
IRX3	-0.0923699	0.0309245
SLC25A30	-0.0923951	0.0308785
HIST1H3B	-0.0925406	0.0306144
TAS2R30	-0.0925418	0.0306122
C9orf79	-0.0925515	0.0305948
C22orf9	-0.092608	0.0304927
LNX2	-0.092625	0.0304622
FBXL17	-0.0926303	0.0304525
NIPAL1	-0.0926922	0.0303413
CD300LB	-0.0926954	0.0303356
HBZ	-0.0927088	0.0303115
BCL2A1	-0.0927249	0.0302828
NPHP3	-0.0927342	0.030266
ASPHD2	-0.0927621	0.0302161
IL32	-0.0927869	0.0301719
USP16	-0.0929134	0.0299466
KCTD16	-0.0929858	0.0298183
CCDC65	-0.0929924	0.0298067
SYCP3	-0.0930031	0.0297877
KRT73	-0.0930613	0.0296852
MCM6	-0.0930972	0.029622
SLC41A2	-0.0931415	0.0295442
TCF25	-0.0931429	0.0295416
DHX35	-0.0931482	0.0295324
NRGN	-0.0931768	0.0294823
LOC641298	-0.0932529	0.0293492
CAPZA2	-0.0933334	0.0292092
FAM115A	-0.0933573	0.0291676
ZNF224	-0.0933808	0.0291269
TMEM14E	-0.0933858	0.0291182
CD2BP2	-0.093408	0.0290799
PTH2R	-0.0934286	0.0290442
CALU	-0.093435	0.0290332
NFAM1	-0.0934515	0.0290046
OR8D1	-0.0934839	0.0289487
LPXN	-0.0935095	0.0289047
SMCR7	-0.0935373	0.0288569
TAP2	-0.0935865	0.0287723
LANCL3	-0.0936261	0.0287046
BLVRA	-0.0936273	0.0287025
TTTY2	-0.0936488	0.0286657
P2RY1	-0.0936649	0.0286381
CIB3	-0.0937216	0.0285415
NUCKS1	-0.0937377	0.028514
C9orf66	-0.0937618	0.028473
DHX58	-0.0938068	0.0283967
LOC731789	-0.0938183	0.0283772
CHP	-0.0938747	0.0282818
FLJ46111	-0.0939224	0.0282013
TGFBRAP1	-0.0939526	0.0281504
CPEB2	-0.0939549	0.0281465
RND1	-0.0940124	0.02805
ENPP1	-0.0940239	0.0280306
LNX1	-0.0940515	0.0279844
TPD52L2	-0.094106	0.0278934
PTPRO	-0.0941448	0.0278286
FLJ45079	-0.094167	0.0277917
FCRL3	-0.0942163	0.0277097
PLEKHG7	-0.094361	0.0274704
VTN	-0.0943766	0.0274448
NDST4	-0.0943872	0.0274272
TNRC6B	-0.0943905	0.0274219
COL8A1	-0.0944049	0.0273982
RXFP3	-0.094444	0.0273339
C17orf65	-0.0944463	0.0273301
TTLL4	-0.0945249	0.0272015
SEC62	-0.0945547	0.0271527
PHOX2B	-0.0945561	0.0271506
ERN1	-0.0945869	0.0271003
HIGD1B	-0.0946179	0.0270499
ANO7	-0.0946384	0.0270165
LOC100132354	-0.0946457	0.0270047
GDNF	-0.0946952	0.0269244
SAP30BP	-0.0947036	0.0269108
FAM163A	-0.0947359	0.0268586
C3orf14	-0.094749	0.0268374
GNAQ	-0.0947825	0.0267833
ZNF717	-0.0948012	0.0267533
ANKHD1-EIF4EBP3	-0.0948776	0.0266303
C9orf11	-0.0948777	0.0266302
ACADL	-0.0948809	0.0266251
SLC3A2	-0.0948843	0.0266197
RNASE2	-0.0948882	0.0266133
TNKS1BP1	-0.0949105	0.0265776
MAGED2	-0.0949434	0.0265249
NLRC4	-0.0949435	0.0265249
PGS1	-0.0949476	0.0265183
ZNF608	-0.09499	0.0264506
ANAPC16	-0.0950311	0.0263852
RTN4IP1	-0.0950593	0.0263403
CEACAM4	-0.0951285	0.0262305
F3	-0.0951845	0.026142
GTSF1L	-0.0952047	0.0261101
ATF7	-0.0952091	0.0261031
LY6D	-0.095211	0.0261001
CDK11B	-0.0952937	0.0259699
CELP	-0.0953095	0.0259452
KRT12	-0.0953184	0.0259313
FAM86D	-0.0953771	0.0258393
LOC644669	-0.0954019	0.0258007
KLHL9	-0.0954124	0.0257842
TMED10P1	-0.0954267	0.025762
NT5C	-0.0954894	0.0256643
MYOD1	-0.0955124	0.0256286
GPR111	-0.0955283	0.025604
NAGLU	-0.0955577	0.0255584
TREM1	-0.0956188	0.0254639
GGT5	-0.0956198	0.0254623
GNLY	-0.0957777	0.0252197
SFT2D2	-0.0958159	0.0251612
GPR84	-0.0958843	0.0250569
TCAP	-0.0959779	0.0249149
ADCYAP1	-0.0959953	0.0248885
GIMAP2	-0.0961169	0.024705
ALDH1A1	-0.0961222	0.024697
SH3BP4	-0.0961576	0.0246438
FERMT3	-0.0961682	0.024628
SYCE1	-0.09617	0.0246252
MMP8	-0.0961841	0.0246041
FANCE	-0.0962394	0.0245214
ACER2	-0.096278	0.0244639
POSTN	-0.0963144	0.0244096
SLC22A1	-0.0963228	0.0243971
CNOT6L	-0.0963246	0.0243944
GOLGA6L5	-0.0963573	0.0243458
ZNF589	-0.0963828	0.024308
ZMIZ1	-0.0964335	0.0242329
NCRNA00032	-0.0964392	0.0242245
LYRM7	-0.0965206	0.0241044
CENPJ	-0.0965234	0.0241003
SRPR	-0.0965318	0.0240879
MUC12	-0.0965522	0.0240579
DENND4C	-0.0965557	0.0240528
SLC45A1	-0.0965579	0.0240495
BTG1	-0.0965759	0.0240231
RPS6KA3	-0.0967298	0.0237981
OTOR	-0.0968157	0.0236734
DNAJC8	-0.0968306	0.0236517
FN3KRP	-0.0968311	0.023651
CUTC	-0.0968364	0.0236433
TRAFD1	-0.0968434	0.0236332
MEI1	-0.0968691	0.023596
COG8	-0.0968944	0.0235596
MYO3B	-0.0969935	0.0234168
ZNF501	-0.0970548	0.023329
FARP1	-0.0970661	0.0233128
MRPS18A	-0.0971713	0.0231627
AKR1D1	-0.0971836	0.0231453
UBR3	-0.0972019	0.0231192
CLEC16A	-0.0972588	0.0230387
PDE1A	-0.0972618	0.0230344
PYCR2	-0.0972699	0.0230229
SSTR5	-0.0972732	0.0230182
PARP14	-0.0973472	0.0229138
RAB8A	-0.09737	0.0228816
DNTT	-0.097387	0.0228577
IKZF2	-0.0974832	0.0227229
KBTBD8	-0.0974977	0.0227026
PON3	-0.0975979	0.0225629
MYH14	-0.0976158	0.022538
KIAA1033	-0.0976168	0.0225367
ADIPOR2	-0.097643	0.0225002
MUTYH	-0.0976854	0.0224415
FRMD4B	-0.0977026	0.0224177
RPRD1A	-0.0977175	0.0223971
LECT2	-0.0977311	0.0223783
CTDSPL2	-0.0977748	0.0223181
PORCN	-0.0977815	0.0223089
SLC44A3	-0.0977863	0.0223022
VWDE	-0.0978143	0.0222638
SLC26A9	-0.097866	0.0221928
FLJ35776	-0.0978744	0.0221814
TBR1	-0.0978937	0.0221549
PLEK	-0.0979202	0.0221186
SIGLEC8	-0.0979441	0.0220861
GSTT2	-0.0979916	0.0220213
GTDC1	-0.098011	0.0219948
DENND1B	-0.0980736	0.0219099
RXRB	-0.0980756	0.0219072
C3orf74	-0.0981633	0.0217885
FAM27C	-0.0981993	0.0217401
TMEM63A	-0.0982716	0.0216429
BBS10	-0.0983216	0.0215761
NKAIN3	-0.0983283	0.0215671
ATP5SL	-0.098349	0.0215394
MIB1	-0.0984094	0.0214589
MYF5	-0.098465	0.0213849
TAPT1	-0.0985353	0.0212919
CAMSAP1L1	-0.0985789	0.0212342
DHRS1	-0.0988367	0.0208967
SENP1	-0.0988754	0.0208464
C10orf122	-0.0988898	0.0208276
C14orf169	-0.0989161	0.0207936
HSPH1	-0.0989346	0.0207696
CECR6	-0.0989784	0.0207131
MTCP1NB	-0.0990188	0.020661
DEDD2	-0.0990272	0.0206502
ADIPOQ	-0.0990339	0.0206415
CDAN1	-0.0991337	0.0205134
ZNF134	-0.0991476	0.0204956
FAM168B	-0.0991681	0.0204694
SIX3	-0.0992518	0.0203627
C17orf60	-0.09928	0.0203269
N4BP2L2	-0.0993333	0.0202594
CYP4F11	-0.0993615	0.0202236
DPP6	-0.0993861	0.0201926
HEATR4	-0.0993937	0.0201829
SEMA5B	-0.0994018	0.0201727
SF3A3	-0.0994102	0.0201622
SLC13A1	-0.0994869	0.0200657
SYNGR3	-0.0995249	0.0200179
BTBD17	-0.0995332	0.0200076
ADAM10	-0.0995471	0.0199902
RIF1	-0.099548	0.019989
COMMD6	-0.0995833	0.0199449
FEM1A	-0.0996014	0.0199223
NPL	-0.0996205	0.0198985
ZNF813	-0.099632	0.0198842
IKBKG	-0.0996722	0.0198342
LOC84740	-0.0996738	0.0198321
TSG1	-0.0997399	0.0197502
AK1	-0.0997722	0.0197102
ZNRF1	-0.0998671	0.0195932
NICN1	-0.0999225	0.0195252
KLHL26	-0.100022	0.0194034
IL18BP	-0.100051	0.0193678
GCM2	-0.1001	0.0193089
IGFBP1	-0.100105	0.019303
SNX17	-0.100135	0.0192661
ARHGEF3	-0.100164	0.0192307
SOHLH2	-0.100166	0.0192281
LTB4R	-0.100192	0.0191976
CMTM2	-0.100271	0.0191013
NFYB	-0.100314	0.0190503
BOK	-0.100391	0.0189583
ZNF394	-0.100408	0.0189376
IGLL1	-0.100453	0.0188837
GAGE10	-0.100482	0.0188492
SPINK9	-0.100557	0.0187604
CEP152	-0.100585	0.0187276
LOC341056	-0.100668	0.0186296
GNS	-0.100733	0.0185529
CEACAM16	-0.100734	0.0185525
LIPF	-0.100753	0.0185299
CNFN	-0.100819	0.0184525
INSR	-0.100854	0.0184122
CES3	-0.100898	0.0183601
HACE1	-0.10093	0.0183229
EXOC3L2	-0.10099	0.0182542
TRY6	-0.101034	0.0182036
PDZD4	-0.101058	0.0181759
REG1B	-0.101089	0.0181394
MAGI1	-0.10111	0.0181157
EPHX1	-0.101168	0.0180496
SP110	-0.101215	0.0179948
CYP4F2	-0.101264	0.01794
KRTAP17-1	-0.101282	0.0179185
TRIM75P	-0.101322	0.0178731
CDK8	-0.101351	0.0178412
UPK3A	-0.101351	0.0178407
DCP1A	-0.101365	0.0178251
TMEM184B	-0.101377	0.0178112
MADD	-0.101379	0.0178091
PROX1	-0.101404	0.017781
KIAA1715	-0.101499	0.0176735
SRCAP	-0.101519	0.0176517
RGS19	-0.101534	0.0176347
STON2	-0.101564	0.0176007
SEMA6B	-0.101593	0.0175681
OSTBETA	-0.101669	0.0174836
ATP10A	-0.101716	0.017431
ACOT9	-0.10174	0.0174042
C21orf7	-0.101777	0.0173641
ARFGEF2	-0.101782	0.0173582
GREB1	-0.101819	0.0173173
AFM	-0.101847	0.0172868
KIAA1486	-0.101907	0.0172208
HOXB7	-0.101993	0.0171265
GBF1	-0.102027	0.0170888
CNPY1	-0.102054	0.017059
PLA2G12B	-0.102073	0.0170386
ERMP1	-0.102217	0.0168831
KIAA0586	-0.102247	0.0168498
P2RX3	-0.10225	0.0168469
RBBP5	-0.102297	0.016796
HOXD3	-0.102361	0.016728
IFNA21	-0.102403	0.0166826
DIRC1	-0.102449	0.0166342
EEA1	-0.102506	0.0165727
SLC7A7	-0.102509	0.0165699
FAM159A	-0.102541	0.0165353
ZNF223	-0.102555	0.0165208
LAMA1	-0.102581	0.0164939
C9orf172	-0.102586	0.0164882
SBK2	-0.102592	0.0164818
PDP2	-0.102602	0.0164715
ZKSCAN2	-0.102636	0.0164349
DHRS2	-0.102727	0.0163394
LOC91450	-0.102733	0.0163337
GPR176	-0.102735	0.0163312
HS6ST1	-0.102742	0.016324
CLCN4	-0.102752	0.0163138
ZNF132	-0.102797	0.016266
ANKHD1	-0.102808	0.0162551
C1orf101	-0.102824	0.016238
SLC22A18	-0.102834	0.0162277
KEL	-0.102856	0.0162047
GRP	-0.102876	0.0161834
ABCC6P1	-0.102999	0.0160567
LINGO2	-0.103001	0.0160547
DPP9	-0.103029	0.0160254
NUDT12	-0.103037	0.0160169
CASP4	-0.103064	0.0159891
VPS45	-0.103068	0.015985
PTPRS	-0.103098	0.0159542
SLAMF8	-0.103099	0.015953
PDZK1IP1	-0.103131	0.015921
C1orf123	-0.103169	0.0158819
DUSP4	-0.1032	0.0158495
TPP2	-0.103235	0.0158137
RRAGC	-0.103257	0.0157919
ZC3H6	-0.103274	0.0157748
DAB2	-0.103284	0.0157647
MAT1A	-0.103312	0.0157355
HBA1	-0.103386	0.0156605
ZNF417	-0.103411	0.0156353
TNFSF13B	-0.103435	0.0156116
KDELC1	-0.1035	0.0155458
GALNT2	-0.10351	0.015536
LIMS1	-0.103521	0.015525
NIPBL	-0.103555	0.015491
ZNF584	-0.103601	0.0154451
FAM5C	-0.103681	0.0153652
STC1	-0.103699	0.0153467
ZNF709	-0.103747	0.0152997
SCGB1D2	-0.103797	0.0152496
KLHDC7A	-0.103841	0.0152066
UTP20	-0.103846	0.0152018
IGLL3	-0.103876	0.0151721
C4orf23	-0.103917	0.0151322
GRAMD4	-0.103987	0.0150635
STAP1	-0.103987	0.0150633
LOC100192379	-0.104036	0.0150155
MTAP	-0.104049	0.0150026
ZBTB26	-0.10406	0.0149925
MIS12	-0.104093	0.0149599
SAA2	-0.104172	0.0148835
SLC22A25	-0.104192	0.0148639
NCOA4	-0.104242	0.0148161
HERC2	-0.104302	0.0147582
CXCR5	-0.104333	0.0147283
OR4N4	-0.104359	0.0147036
TIGIT	-0.104378	0.0146853
H2BFXP	-0.104421	0.0146444
HLA-L	-0.104485	0.0145836
SLU7	-0.104513	0.0145573
DDX58	-0.104612	0.0144636
CREB3L2	-0.104653	0.0144247
CAPRIN2	-0.104691	0.0143895
SYNPO2L	-0.104702	0.0143792
BTF3L1	-0.104747	0.0143363
CHMP1A	-0.104757	0.0143271
C13orf38	-0.104825	0.0142641
AP1M1	-0.104932	0.0141649
ZBTB8B	-0.105002	0.0141001
ELOVL4	-0.105039	0.0140656
MEGF6	-0.105042	0.0140626
ESYT3	-0.105084	0.0140246
ID2B	-0.1051	0.0140094
SOX21	-0.105118	0.0139936
DKFZp761E198	-0.105167	0.0139488
DGKK	-0.105196	0.0139217
TXLNG	-0.105259	0.0138646
ADAM8	-0.105265	0.0138591
RUFY3	-0.105272	0.0138528
TMIGD2	-0.105372	0.0137628
SLC39A10	-0.105393	0.0137432
ARHGEF12	-0.105418	0.0137209
FAM66A	-0.105425	0.0137142
PHEX	-0.105428	0.0137114
LRRC23	-0.105506	0.0136417
SNORA59B	-0.105563	0.0135913
C22orf13	-0.10575	0.0134249
C9orf109	-0.105905	0.0132882
FGF9	-0.105959	0.0132415
RWDD2B	-0.10603	0.0131794
C1QB	-0.106058	0.0131556
C6orf217	-0.10613	0.0130929
ZNF70	-0.106167	0.0130607
KCTD20	-0.106172	0.0130567
LOC389493	-0.106176	0.0130529
DDHD1	-0.106213	0.0130215
LOC90586	-0.106235	0.0130024
FUT11	-0.106279	0.0129648
SH2D1B	-0.106318	0.0129318
SERTAD3	-0.10633	0.012921
COPS4	-0.106425	0.0128405
OSCAR	-0.106437	0.0128303
UXS1	-0.106479	0.012795
LOC648740	-0.106479	0.0127948
TAF9B	-0.106581	0.0127087
FBXO3	-0.106601	0.0126919
FAM82A2	-0.106685	0.0126213
ARL6IP5	-0.106694	0.0126142
RNF212	-0.106749	0.0125678
HS6ST2	-0.106756	0.0125619
INTS6	-0.106821	0.0125082
PIK3C2G	-0.106859	0.0124764
OR2T33	-0.106907	0.0124372
AKAP8	-0.106944	0.0124062
ZNF271	-0.107107	0.0122726
PRSS48	-0.10711	0.01227
ASGR2	-0.107132	0.0122522
ATRX	-0.107195	0.0122013
C18orf55	-0.10724	0.012165
CLLU1OS	-0.107264	0.0121453
NHLRC4	-0.10728	0.0121325
ZNF844	-0.107305	0.0121125
WNT8A	-0.107364	0.0120645
ABAT	-0.107389	0.012045
JMY	-0.107462	0.0119865
KIAA1919	-0.107505	0.0119521
TXNDC6	-0.107529	0.0119328
UROD	-0.107538	0.0119257
ENPEP	-0.107543	0.011922
DNAJC5G	-0.107547	0.0119186
NFIB	-0.107614	0.0118655
TMPRSS6	-0.107624	0.0118574
TBCEL	-0.107639	0.0118453
GHITM	-0.107645	0.0118404
IDI1	-0.107661	0.0118279
FETUB	-0.107672	0.0118194
ARHGDIB	-0.107692	0.0118033
PHAX	-0.107694	0.0118023
ZNF596	-0.107742	0.0117644
TUBGCP4	-0.107759	0.0117509
UPB1	-0.107802	0.011717
YPEL3	-0.10787	0.0116639
GNPTAB	-0.10788	0.0116563
PLEKHG6	-0.107894	0.0116451
COQ9	-0.107928	0.011619
NT5DC2	-0.107942	0.0116083
TMEM121	-0.10795	0.0116016
PGPEP1	-0.10797	0.0115861
PEX26	-0.107972	0.011585
GMPR2	-0.107975	0.0115821
LOC285733	-0.108153	0.0114456
TPTE2	-0.10832	0.0113178
CD28	-0.108331	0.0113094
ZNF136	-0.108372	0.0112787
SLAMF7	-0.108385	0.0112686
CLIP1	-0.108443	0.0112247
WDR35	-0.108516	0.0111702
FSTL4	-0.108568	0.0111308
SNORD116-4	-0.108682	0.0110462
ANXA2P3	-0.108718	0.0110194
ZBED2	-0.108793	0.0109638
AQP12B	-0.108894	0.0108895
RMST	-0.108899	0.0108853
OR52H1	-0.108914	0.0108744
ADAM17	-0.10898	0.010826
HMBOX1	-0.109072	0.010759
DOK6	-0.109076	0.0107568
SLC25A26	-0.109159	0.0106962
MKLN1	-0.109171	0.0106879
RGS14	-0.109201	0.0106659
PPP4R4	-0.109224	0.0106498
CGRRF1	-0.109248	0.0106322
RASGRP1	-0.109259	0.0106242
ICAM5	-0.109368	0.0105466
DLST	-0.109385	0.0105343
AP1B1	-0.109391	0.0105301
C1orf198	-0.109391	0.01053
SON	-0.109404	0.0105204
TAF1	-0.109448	0.0104891
TM4SF18	-0.109481	0.0104661
CCL27	-0.109536	0.0104269
NCOA1	-0.109577	0.0103985
SCARNA9L	-0.109577	0.0103979
RNF216L	-0.109602	0.0103808
CYP3A7	-0.109635	0.0103572
MS4A1	-0.10969	0.010319
RGSL1	-0.109714	0.0103023
NMNAT2	-0.109715	0.0103017
TBC1D9	-0.109773	0.0102609
FLJ35390	-0.109822	0.0102272
KIF5B	-0.109828	0.0102229
RNF8	-0.109854	0.0102048
OR5C1	-0.109883	0.0101844
MAGED4	-0.109914	0.010163
DIS3L	-0.109998	0.0101057
PRINS	-0.109998	0.0101056
KCNIP4	-0.110021	0.0100899
KIAA0664P3	-0.110027	0.0100855
TMEM189	-0.110091	0.0100417
DYNLRB2	-0.110173	0.00998595
ADAM32	-0.110249	0.00993459
MKKS	-0.110277	0.00991558
PHF13	-0.110278	0.00991453
CCT8L2	-0.110306	0.00989575
CELF4	-0.110316	0.0098889
APOBEC3H	-0.110352	0.00986498
PTTG1IP	-0.110358	0.0098609
CLYBL	-0.110472	0.00978447
INSRR	-0.110732	0.00961221
YME1L1	-0.110748	0.009602
RLF	-0.110782	0.00957967
CWC25	-0.110814	0.00955844
INPP5A	-0.110828	0.00954939
C1QTNF9	-0.110854	0.00953231
GSTM1	-0.110857	0.00953041
LRP6	-0.110859	0.00952899
MTRR	-0.110876	0.00951838
C17orf81	-0.110935	0.00947994
ZFATAS	-0.110939	0.00947731
ZIC4	-0.11095	0.00947033
OR5B12	-0.110962	0.00946225
SCGB2A2	-0.111011	0.00943062
LOC100190939	-0.111035	0.00941523
KLC1	-0.111052	0.00940439
WBP2	-0.111109	0.0093675
SEC31A	-0.111124	0.00935795
CREBL2	-0.111167	0.00933055
SEPW1	-0.111175	0.00932541
C1QA	-0.111195	0.00931213
ORM1	-0.111208	0.00930429
SLCO4A1	-0.111307	0.00924118
ICMT	-0.11134	0.00922039
hsa-let-7g-3p	-0.111347	0.00921568
CYP20A1	-0.111353	0.00921181
FRMPD2L2	-0.111409	0.0091768
TCF19	-0.111425	0.00916677
DENND4A	-0.111426	0.00916566
CLEC7A	-0.111438	0.00915855
FLJ13224	-0.111516	0.0091094
CHIA	-0.111517	0.00910906
CTCF	-0.111615	0.00904782
EFCAB3	-0.111658	0.00902059
RET	-0.111842	0.00890714
DYDC1	-0.111868	0.00889103
HTA	-0.111916	0.00886219
SRGAP3	-0.111932	0.0088519
PRB2	-0.111972	0.00882794
TTN	-0.112007	0.00880677
PRSS53	-0.112101	0.00874946
FMR1NB	-0.112126	0.00873417
SLC5A9	-0.112187	0.00869799
LILRB2	-0.112187	0.00869784
CCDC50	-0.1122	0.00868996
BRS3	-0.112253	0.00865793
TSC22D2	-0.112287	0.00863759
ZKSCAN3	-0.112292	0.00863464
C4orf26	-0.112414	0.0085621
CNGA4	-0.11247	0.00852891
FMN1	-0.112499	0.00851228
SLC39A1	-0.1125	0.0085116
POM121L9P	-0.112561	0.00847564
C6orf167	-0.112615	0.0084437
MOGAT2	-0.112667	0.0084137
CNOT1	-0.112698	0.00839545
BFSP1	-0.112747	0.00836693
CRYBA1	-0.112788	0.00834316
DHRS4	-0.112806	0.00833286
C9orf128	-0.112815	0.00832725
KIAA2022	-0.11283	0.00831901
SLA2	-0.112895	0.00828127
FRMD5	-0.112916	0.00826946
MATN3	-0.112932	0.00826034
HTRA3	-0.11295	0.00824973
APOL4	-0.11298	0.00823284
STOML1	-0.112996	0.00822344
TOM1L2	-0.113017	0.00821156
KIAA0467	-0.113073	0.0081795
RPE65	-0.113094	0.00816772
HIST1H2BB	-0.113145	0.0081388
EHBP1	-0.113178	0.00812001
GTF2A1	-0.113196	0.00810962
SALL2	-0.113202	0.00810664
TBC1D10C	-0.113203	0.0081056
CMBL	-0.113294	0.0080549
NXPH4	-0.113326	0.00803692
ENPP7	-0.11345	0.00796747
BLCAP	-0.11347	0.00795652
GGH	-0.113483	0.00794918
MMP27	-0.113517	0.00793049
C19orf76	-0.113525	0.00792578
LOC347376	-0.113531	0.00792264
C22orf26	-0.113551	0.00791168
PPP1R7	-0.113556	0.00790877
LOC285045	-0.113558	0.00790784
MPP7	-0.113561	0.00790592
LZTS2	-0.113562	0.00790539
PLCH1	-0.113586	0.00789247
SLCO1B1	-0.113596	0.00788694
LOC284441	-0.11363	0.00786829
DSCR8	-0.113667	0.00784801
LILRA1	-0.113721	0.00781833
TRIM69	-0.113725	0.00781615
SPAG6	-0.113749	0.00780283
LDHD	-0.113753	0.00780096
OR5B2	-0.113754	0.00780036
OR1Q1	-0.113763	0.00779509
C3orf55	-0.113832	0.00775781
ZC3HAV1L	-0.113865	0.00774008
PSG8	-0.114039	0.00764639
ZBTB49	-0.114049	0.00764094
CLCN6	-0.114097	0.00761525
OR5M11	-0.114119	0.00760363
ACTL6B	-0.114129	0.00759809
GNB4	-0.114158	0.00758261
GLTPD2	-0.114175	0.0075737
AGTR2	-0.114242	0.00753798
ZNF225	-0.114297	0.00750898
WISP3	-0.114315	0.00749968
ANKRD20B	-0.114339	0.0074871
CDK11A	-0.114398	0.00745594
PHF21A	-0.114435	0.00743669
ATP2B2	-0.114443	0.00743267
GDPD3	-0.114452	0.00742764
SRP68	-0.114454	0.00742695
CRX	-0.114455	0.00742618
ITGA11	-0.114513	0.007396
MUC6	-0.114539	0.00738249
ARG2	-0.114552	0.00737555
RAB7L1	-0.114579	0.0073618
MDH1	-0.11458	0.00736141
SKIL	-0.114607	0.00734726
TRIM26	-0.114608	0.00734688
BEX2	-0.114637	0.00733152
HNF1B	-0.114677	0.00731103
GPR18	-0.114708	0.00729535
NTAN1	-0.114719	0.00728966
NMB	-0.11477	0.00726351
HIST1H2BM	-0.114796	0.00725015
ZAR1L	-0.114803	0.00724637
MGC27382	-0.114813	0.00724148
PRSS37	-0.114875	0.00720986
C14orf93	-0.114878	0.00720833
TMEM116	-0.114883	0.00720571
IL2RG	-0.114912	0.00719093
NIT1	-0.115022	0.00713572
SHOX	-0.115032	0.0071306
ALKBH1	-0.115053	0.00711988
ERBB2IP	-0.115072	0.00711022
MAGEB4	-0.115119	0.00708705
OBP2A	-0.115133	0.00708004
STBD1	-0.115135	0.00707897
CCDC163P	-0.115141	0.00707576
FOXP3	-0.115378	0.00695844
EXOC2	-0.115454	0.00692115
TADA2A	-0.115458	0.0069192
CP	-0.115478	0.00690931
FAM83C	-0.115482	0.00690721
GLYAT	-0.115503	0.00689673
LIN28B	-0.115532	0.00688288
SVOPL	-0.11557	0.0068643
ENG	-0.115658	0.00682155
OR14C36	-0.115708	0.00679727
ZNF641	-0.115717	0.00679297
DNAJC3	-0.115725	0.00678906
POTEC	-0.115781	0.00676216
PKNOX1	-0.115794	0.00675624
PARP15	-0.115905	0.00670327
ANAPC4	-0.115931	0.00669082
MAN2A1	-0.115939	0.00668669
ZNF570	-0.116009	0.00665349
C3orf19	-0.116025	0.00664617
PITX2	-0.116275	0.00652896
VPS18	-0.116305	0.00651504
CYP2A6	-0.116376	0.0064822
CD8B	-0.116398	0.00647202
MGC23284	-0.116409	0.00646696
DUPD1	-0.116436	0.00645425
AP2B1	-0.116466	0.00644063
ZNF385A	-0.116471	0.00643826
PBX4	-0.116472	0.00643773
FAM175B	-0.116525	0.00641345
UACA	-0.116572	0.00639211
NLRX1	-0.116583	0.00638705
GAP43	-0.116593	0.00638274
KRT85	-0.116593	0.00638251
KIF19	-0.116748	0.00631241
ART3	-0.11678	0.00629781
BRAP	-0.116819	0.00628016
SH3RF3	-0.11682	0.00627996
METTL7B	-0.11683	0.00627556
CUBN	-0.116838	0.00627179
UHRF2	-0.116846	0.00626802
C17orf59	-0.116984	0.00620681
TASP1	-0.116996	0.00620147
TNFAIP8	-0.117005	0.00619722
CCDC152	-0.117052	0.00617628
RILPL1	-0.117131	0.00614166
ZNF318	-0.11714	0.00613748
ZNF576	-0.117144	0.00613592
SNORD94	-0.117167	0.00612599
PRR4	-0.117228	0.00609904
SGK223	-0.117237	0.00609516
KCNJ13	-0.117238	0.00609485
ASMTL	-0.117249	0.00608997
ZNF160	-0.117282	0.00607539
PIP	-0.117349	0.00604653
ZNF248	-0.117354	0.00604394
OR4N3P	-0.117368	0.00603793
BPI	-0.117418	0.00601635
IRF9	-0.117487	0.00598658
KIAA0776	-0.117493	0.0059841
LOC387646	-0.117562	0.00595463
TNF	-0.117644	0.00591968
PAPOLG	-0.117736	0.00588036
SMURF1	-0.117848	0.00583306
POU4F2	-0.117875	0.00582184
BAG5	-0.117923	0.00580161
MAGT1	-0.117932	0.00579778
IFNK	-0.117979	0.00577824
OR1K1	-0.11802	0.0057615
AEBP2	-0.118048	0.00574955
CDC42BPG	-0.118067	0.00574184
HTR7P1	-0.118074	0.00573904
KIAA1012	-0.118106	0.00572555
COL4A3BP	-0.118122	0.00571888
NOTO	-0.118167	0.00570056
GKN2	-0.118193	0.00568981
UBE4B	-0.118213	0.00568168
OR13C2	-0.118213	0.00568139
MTMR2	-0.118223	0.00567738
SPAG8	-0.118236	0.00567211
SLC16A14	-0.118237	0.00567194
DMXL1	-0.11839	0.00560953
C19orf55	-0.118445	0.00558702
TMEM167B	-0.118487	0.00557002
HERC5	-0.118564	0.00553904
PRSS23	-0.1186	0.00552459
ASAP3	-0.118617	0.00551778
TRIM4	-0.11864	0.00550862
DPEP2	-0.118657	0.00550193
C7orf60	-0.118661	0.00550053
FAM192A	-0.118718	0.00547756
DEPDC6	-0.118773	0.00545585
FLJ39582	-0.11879	0.00544926
LRRN2	-0.118812	0.00544055
BRDT	-0.118832	0.00543252
SRBD1	-0.118844	0.00542802
KBTBD2	-0.11887	0.00541756
PREPL	-0.118914	0.00540035
RPGR	-0.118928	0.005395
SAMSN1	-0.118989	0.00537085
DYNC1I2	-0.118991	0.00537037
RBM26	-0.119002	0.00536576
TNFAIP1	-0.119014	0.00536119
FAM102A	-0.119051	0.00534691
RAG2	-0.119253	0.00526904
SLC36A4	-0.119295	0.00525289
SREBF2	-0.119304	0.0052495
GNG4	-0.119309	0.00524753
KLF13	-0.119318	0.00524383
KCNQ1	-0.119408	0.00520988
GRB10	-0.119423	0.00520389
TLX2	-0.119436	0.00519921
LOC157627	-0.119447	0.0051949
FAM83E	-0.119477	0.00518352
GPR52	-0.119481	0.00518219
DDX47	-0.119484	0.00518096
PRSS21	-0.119547	0.00515717
TPP1	-0.119553	0.00515478
CYB5R1	-0.119596	0.00513873
FLJ43950	-0.119601	0.00513683
TMEM213	-0.119619	0.00513036
UHMK1	-0.119721	0.00509226
SHISA6	-0.119847	0.00504562
DHRS4L2	-0.119969	0.0050008
ACVR1C	-0.120002	0.00498842
C9orf144	-0.120018	0.00498284
KIAA1407	-0.120029	0.00497865
ATP6V0A4	-0.120061	0.00496726
SLC16A11	-0.120069	0.0049641
VDR	-0.120245	0.00490041
ORM2	-0.120401	0.00484494
SPI1	-0.120413	0.00484039
CDC42BPB	-0.120441	0.0048307
C8orf73	-0.120543	0.00479464
ARHGAP5	-0.120619	0.00476783
KIAA0562	-0.120625	0.00476574
POU2F1	-0.120665	0.00475193
LRP2	-0.120749	0.00472264
IFI44	-0.120776	0.00471329
KNG1	-0.120807	0.00470248
IL17F	-0.120814	0.00469987
DFNB59	-0.120824	0.00469653
HECTD3	-0.12088	0.00467723
TAS1R3	-0.12093	0.00466012
BEST3	-0.120951	0.00465263
MTHFSD	-0.121141	0.00458819
UBXN7	-0.121141	0.00458817
TNFRSF25	-0.121141	0.00458804
TIRAP	-0.121145	0.00458663
SIRPG	-0.121151	0.00458483
GSDMD	-0.121155	0.00458325
TAF1B	-0.121167	0.00457923
ODF4	-0.121225	0.00455966
SRGAP1	-0.121448	0.00448531
RAB32	-0.121526	0.00445926
GABARAPL3	-0.121557	0.00444916
PYROXD1	-0.121559	0.00444857
DDX60	-0.121607	0.00443275
C3AR1	-0.121686	0.00440674
KYNU	-0.121698	0.00440292
LOC400657	-0.121707	0.00440003
NQO1	-0.121746	0.00438719
TMEM74	-0.12177	0.0043795
FLG	-0.121782	0.00437575
NCOR2	-0.121784	0.00437496
CABIN1	-0.121846	0.00435494
CD300C	-0.121899	0.00433788
TGS1	-0.121905	0.00433601
SAE1	-0.121996	0.00430679
BRMS1L	-0.122002	0.00430483
TYMP	-0.122081	0.00427957
EFR3A	-0.1221	0.0042735
NCRNA00182	-0.12214	0.00426088
SLCO4C1	-0.122152	0.00425717
AIM2	-0.122164	0.00425332
KCTD12	-0.122177	0.0042492
WIPF2	-0.122245	0.00422776
HLA-DRB6	-0.122316	0.00420563
LOC100130238	-0.122323	0.00420324
XPO4	-0.122328	0.00420171
LHX9	-0.122381	0.00418521
ENTPD4	-0.122402	0.00417861
NSFL1C	-0.122491	0.00415103
MMP25	-0.122569	0.00412716
FLOT2	-0.122584	0.00412242
C14orf105	-0.122609	0.00411475
PSAP	-0.122624	0.00411016
HIP1	-0.122663	0.00409827
RAB42	-0.12268	0.00409316
KIAA0947	-0.122786	0.00406072
HLA-DPB2	-0.122834	0.00404618
ACOT1	-0.122859	0.00403856
C7orf69	-0.122887	0.00403024
VAPA	-0.122909	0.00402365
DAPL1	-0.122935	0.00401587
ZSCAN12P1	-0.122953	0.00401057
CTSO	-0.122976	0.00400359
SEC14L2	-0.122984	0.00400103
ODAM	-0.123004	0.0039953
GOLIM4	-0.123014	0.00399226
MYO5B	-0.123017	0.00399125
AQP7P1	-0.123191	0.00393981
C1orf74	-0.123192	0.00393929
GAS2L1	-0.123214	0.0039329
JAKMIP3	-0.123217	0.00393203
SC5DL	-0.123231	0.00392778
WNT9B	-0.123328	0.00389952
ETV3L	-0.123367	0.00388798
COL3A1	-0.123379	0.00388446
RAB8B	-0.123384	0.00388304
RGP1	-0.123388	0.00388199
PTPRD	-0.123421	0.00387234
OAS1	-0.12343	0.00386969
NUP160	-0.123493	0.0038515
IL10	-0.123563	0.00383121
MARCH1	-0.123591	0.0038232
FAM196B	-0.123615	0.00381649
MAGEA2	-0.123618	0.00381544
LYRM2	-0.123652	0.0038059
APOC1P1	-0.123665	0.00380208
EIF2C1	-0.123681	0.00379749
HAVCR1	-0.12372	0.00378642
AATK	-0.12376	0.00377519
SEMA6A	-0.12377	0.00377214
SGIP1	-0.123773	0.00377126
AACSL	-0.123783	0.00376844
SYT14L	-0.123789	0.00376681
SNX3	-0.123825	0.00375655
TAF1L	-0.123875	0.0037425
USP30	-0.123882	0.00374065
POU5F1	-0.123904	0.0037343
PRL	-0.12391	0.00373277
BRD4	-0.123943	0.00372355
FMNL1	-0.123963	0.00371773
ADSSL1	-0.124027	0.0036999
CD86	-0.12408	0.00368526
ARHGEF11	-0.12409	0.00368244
GRAMD1C	-0.124209	0.00364956
PLOD2	-0.12427	0.00363276
CST6	-0.124277	0.00363098
CXCR1	-0.124279	0.00363034
FAM90A7	-0.124353	0.00361018
AK3	-0.124383	0.00360206
UBD	-0.124388	0.0036005
PCNX	-0.124416	0.00359297
C5orf36	-0.124468	0.00357904
PRDM7	-0.12452	0.00356498
LMOD3	-0.124559	0.00355433
PTF1A	-0.124571	0.00355117
NDFIP2	-0.124591	0.00354595
MYOZ2	-0.124644	0.00353157
FOXG1	-0.124661	0.00352713
CCL20	-0.124697	0.0035174
ITIH3	-0.124714	0.0035129
PARD3B	-0.12478	0.00349543
TPPP3	-0.124811	0.00348732
KIAA1267	-0.124814	0.00348642
C2	-0.124818	0.00348541
PDCD1	-0.124842	0.00347909
C18orf25	-0.124848	0.00347764
BCAT1	-0.124868	0.00347226
RIMBP3C	-0.124918	0.00345915
BBOX1	-0.124925	0.00345744
FIG4	-0.124944	0.00345234
HMGCS2	-0.124968	0.0034461
PTCH1	-0.124992	0.0034399
LAPTM5	-0.125009	0.00343546
OR51A7	-0.125012	0.00343454
PDE6C	-0.125065	0.00342089
FIGF	-0.125156	0.00339728
DDX18	-0.125172	0.0033932
MAST3	-0.125184	0.00339016
VOPP1	-0.125252	0.00337267
PAR4	-0.125322	0.00335459
CACNA1B	-0.125343	0.00334946
TMEM200C	-0.125396	0.00333598
DSCR3	-0.125415	0.00333102
LOC100129034	-0.125478	0.00331514
GPR151	-0.125482	0.00331411
LPGAT1	-0.125484	0.00331369
VN1R5	-0.125518	0.00330519
SERPINH1	-0.125536	0.00330047
GPR81	-0.125588	0.00328749
TAB2	-0.125595	0.00328581
PLEC	-0.125596	0.00328546
LOC100240734	-0.125609	0.00328232
CAPNS2	-0.125614	0.00328105
VWA2	-0.125628	0.0032775
OPCML	-0.125672	0.00326657
WNT11	-0.12568	0.00326459
HSD11B2	-0.125744	0.00324878
CUL2	-0.125827	0.00322816
FOXL1	-0.125854	0.00322162
TAS2R1	-0.125864	0.00321907
KNCN	-0.125905	0.00320915
C13orf33	-0.125945	0.00319935
C14orf43	-0.125989	0.00318858
BRSK1	-0.126016	0.00318195
AMOTL1	-0.126016	0.00318193
DKFZp686O24166	-0.126019	0.00318118
SERAC1	-0.12608	0.00316651
PAH	-0.126116	0.00315777
CEP135	-0.126146	0.00315054
GPRC5A	-0.126168	0.00314512
USP8	-0.126189	0.00314014
RGPD5	-0.126242	0.0031276
BUD13	-0.126247	0.00312633
IFT81	-0.126312	0.00311076
PTPRH	-0.126372	0.00309655
OR6A2	-0.126451	0.00307781
CARD10	-0.126482	0.00307062
RNF115	-0.126503	0.00306563
C2orf55	-0.126526	0.0030602
T	-0.12654	0.00305705
CAPN13	-0.126542	0.00305657
TNFRSF13C	-0.12659	0.00304527
LY86	-0.126715	0.00301628
CTNS	-0.126728	0.00301319
KIF1C	-0.126751	0.00300778
ZNF23	-0.126753	0.00300751
ADAMTS7	-0.126845	0.0029862
CSTL1	-0.126927	0.00296739
VSIG4	-0.126928	0.00296718
SNX24	-0.126932	0.00296626
ABTB2	-0.126987	0.00295383
TMPRSS4	-0.127113	0.0029254
C1orf162	-0.127155	0.00291602
ODF3	-0.127193	0.00290736
SNORA6	-0.127203	0.00290521
SPZ1	-0.127232	0.00289858
PTPN7	-0.127273	0.00288946
FCGR2B	-0.127275	0.00288903
TMEM146	-0.127276	0.00288896
G6PC	-0.127306	0.00288217
DACH2	-0.127321	0.00287881
LNP1	-0.127418	0.00285738
FOXB1	-0.127424	0.00285614
HHEX	-0.127499	0.00283964
RARRES3	-0.127504	0.00283858
LOC126536	-0.127546	0.00282943
SEMA4B	-0.127548	0.00282892
BTBD11	-0.127567	0.00282477
LAMP1	-0.127582	0.00282154
EGR2	-0.127593	0.00281902
NCRNA00085	-0.127599	0.00281772
LRAT	-0.127609	0.00281552
HIST1H3I	-0.127646	0.00280749
SAMD7	-0.127664	0.00280372
SHH	-0.127686	0.00279897
NOTCH2	-0.127738	0.0027877
RP1-177G6.2	-0.127907	0.00275149
STK4	-0.127939	0.00274462
IK	-0.127958	0.00274074
PAX6	-0.127978	0.00273637
OLIG3	-0.128005	0.0027308
ARIH1	-0.128024	0.00272668
C1QC	-0.128068	0.00271744
SLC43A2	-0.128131	0.00270412
NOD1	-0.128135	0.00270343
COX4I2	-0.128145	0.00270123
CDH20	-0.128156	0.00269907
SLC30A2	-0.128161	0.00269791
PPWD1	-0.128201	0.00268958
F9	-0.128309	0.00266711
TMEM204	-0.128334	0.00266196
IL1RAP	-0.128422	0.00264391
C22orf39	-0.128454	0.0026374
ZHX2	-0.128462	0.00263566
KBTBD7	-0.128464	0.00263521
ZCCHC11	-0.128537	0.0026204
CRYZL1	-0.128553	0.00261699
BARD1	-0.128561	0.00261539
MACROD2	-0.128586	0.00261034
ST7L	-0.128597	0.00260818
MAGEA6	-0.128633	0.00260094
MIA	-0.128769	0.00257355
MTMR6	-0.128814	0.00256441
PRR18	-0.128919	0.0025436
FAM179B	-0.12892	0.0025435
OR52I1	-0.128961	0.00253527
CWH43	-0.128972	0.00253314
VWF	-0.129035	0.00252067
LRRC29	-0.12906	0.00251586
VNN1	-0.129075	0.00251283
EHF	-0.129133	0.00250157
C11orf9	-0.129135	0.00250111
MTVR2	-0.129145	0.00249924
NPHP1	-0.129165	0.00249539
BASE	-0.129189	0.00249067
DNAJB1	-0.129308	0.00246763
RNF121	-0.129366	0.00245646
TRIM32	-0.129427	0.00244468
C6orf127	-0.129466	0.00243725
GSG1L	-0.12947	0.00243661
SEMA3G	-0.129484	0.00243391
HESRG	-0.129502	0.0024305
VPS33B	-0.129584	0.00241484
CXorf56	-0.129715	0.00239023
CYB5D2	-0.129781	0.00237798
HCG26	-0.129841	0.00236674
TRAF3	-0.129842	0.0023666
RYK	-0.129914	0.00235321
TNFRSF8	-0.130051	0.00232813
DLL4	-0.130265	0.00228927
RPS4Y2	-0.130287	0.00228534
HIST1H1A	-0.130403	0.00226454
CCDC92	-0.130412	0.00226303
FBXL3	-0.130416	0.00226229
SLC19A3	-0.130425	0.00226064
C3orf15	-0.130445	0.00225709
GZMA	-0.130529	0.00224228
GORAB	-0.130531	0.00224179
SAGE1	-0.130564	0.00223611
hsa-let-7c-5p	-0.130577	0.00223379
CTBS	-0.13058	0.0022332
FAM116A	-0.130636	0.00222337
MFSD1	-0.130649	0.00222116
ERICH1	-0.130698	0.00221251
PTPRN	-0.130758	0.00220204
ACAT2	-0.130797	0.00219536
BTLA	-0.130835	0.00218878
RASAL3	-0.130867	0.00218321
ZC3H12A	-0.130934	0.00217174
TLE6	-0.130969	0.00216581
FOXI3	-0.130982	0.00216356
ST6GAL1	-0.131153	0.0021345
ACAD8	-0.131175	0.00213077
UNC45A	-0.131219	0.00212336
ZBTB7A	-0.13135	0.00210145
LRP5	-0.131423	0.00208937
MRPS31	-0.131497	0.00207709
DEF6	-0.131505	0.00207579
RICTOR	-0.131536	0.0020707
PCCA	-0.131542	0.00206968
SLC17A9	-0.13172	0.00204062
SETDB2	-0.131729	0.00203923
NBAS	-0.1318	0.00202776
FKBP5	-0.1318	0.00202769
ARID5B	-0.131867	0.00201701
ABL1	-0.131873	0.00201601
CGB8	-0.131886	0.00201389
C17orf72	-0.13191	0.00201017
CCDC93	-0.131911	0.00200997
HIRIP3	-0.131916	0.00200912
IL20RB	-0.132055	0.00198697
TPST1	-0.13207	0.0019846
OR51G1	-0.132074	0.00198405
CCBP2	-0.132092	0.00198127
FBXO47	-0.132114	0.00197781
CACNA1G	-0.132159	0.0019707
KRTAP24-1	-0.132171	0.00196877
ELN	-0.132196	0.00196482
CNTN4	-0.132218	0.00196135
GTPBP2	-0.132257	0.00195539
IKZF1	-0.132296	0.00194934
MSC	-0.13231	0.00194713
PHLPP2	-0.132315	0.00194635
HOXA6	-0.132329	0.0019441
CCDC74A	-0.132375	0.00193696
LOC100188949	-0.132416	0.00193073
TMEM194B	-0.132527	0.00191362
TMTC3	-0.132533	0.00191277
UGT2B11	-0.132593	0.00190354
LAT2	-0.132597	0.00190306
IPP	-0.132605	0.00190182
MAFG	-0.13261	0.00190103
FAM172A	-0.132628	0.00189828
TEKT2	-0.132666	0.00189253
ARL9	-0.132726	0.00188341
CA4	-0.132798	0.00187265
ITGB2	-0.132801	0.00187221
WNK4	-0.132822	0.0018691
GPS2	-0.132856	0.00186395
GOT2	-0.132862	0.00186308
WDR19	-0.133006	0.0018417
EFCAB6	-0.133036	0.0018374
SYT10	-0.133069	0.00183255
TRIM40	-0.133186	0.00181542
CALM3	-0.133241	0.00180734
OSBPL7	-0.13325	0.00180612
FAM160B1	-0.133284	0.00180123
PLUNC	-0.133373	0.00178835
PSG1	-0.133407	0.00178346
SPESP1	-0.133417	0.00178197
ANO9	-0.13344	0.00177881
ANXA9	-0.133505	0.00176945
LOXL4	-0.133513	0.00176835
KRT72	-0.133515	0.00176807
REG1A	-0.133643	0.00174996
HIST1H2BI	-0.133696	0.00174256
STAT1	-0.133704	0.00174137
NOS2	-0.133734	0.00173721
CGNL1	-0.133778	0.00173109
FSCN1	-0.133799	0.00172812
HERPUD2	-0.133894	0.00171501
MAGEC1	-0.133954	0.00170674
PDZD8	-0.133963	0.0017055
FBXW7	-0.133977	0.00170354
NRBF2	-0.133986	0.00170234
TLR8	-0.134023	0.00169722
MEPE	-0.134029	0.00169642
SPAG11A	-0.134061	0.00169196
SMAGP	-0.134067	0.00169122
SYT3	-0.13408	0.00168937
RCOR3	-0.134082	0.00168921
SCIN	-0.134109	0.00168545
KIAA1737	-0.134124	0.00168343
SNORA48	-0.134317	0.00165738
CLEC12A	-0.134329	0.00165586
DIO2	-0.134331	0.00165551
GJC3	-0.134332	0.00165539
KIAA1109	-0.134349	0.00165318
ABCA7	-0.134397	0.00164669
SLC2A1	-0.134402	0.00164607
DGCR14	-0.134489	0.00163456
WDR59	-0.134522	0.00163021
RFWD3	-0.134609	0.00161866
SH2D5	-0.134652	0.00161311
TBX3	-0.134659	0.00161216
ARHGAP30	-0.134678	0.00160973
FEZF1	-0.1348	0.0015939
SIAE	-0.134861	0.00158603
C20orf123	-0.134993	0.00156911
FAM168A	-0.135008	0.00156717
SENP5	-0.135032	0.00156411
PHLDB2	-0.135077	0.00155845
GZMM	-0.13512	0.00155297
PCDH12	-0.13513	0.00155173
C5orf32	-0.13518	0.00154545
BEX5	-0.135182	0.00154521
KDM3B	-0.1352	0.00154295
POC1B	-0.135213	0.00154139
ANO2	-0.135218	0.00154074
MAP3K2	-0.135266	0.00153468
TBX21	-0.135291	0.00153157
C19orf21	-0.135324	0.00152748
FPR2	-0.135348	0.00152455
KIF5A	-0.135351	0.00152411
ZBED3	-0.135386	0.00151976
GPHA2	-0.135401	0.001518
XYLT1	-0.135402	0.00151779
DHX16	-0.135489	0.0015071
CDH26	-0.135562	0.00149814
RNF151	-0.135583	0.00149558
HIST1H4A	-0.135591	0.00149463
C12orf50	-0.135652	0.00148723
TMEM132D	-0.135674	0.00148456
ADCK4	-0.135678	0.00148413
VCX	-0.135712	0.00148
C1orf180	-0.13575	0.0014754
HIVEP3	-0.135751	0.0014753
SMU1	-0.135841	0.00146443
PRSS42	-0.135891	0.00145849
RALB	-0.135894	0.00145813
FCHO2	-0.135903	0.00145711
CASC1	-0.135929	0.00145394
MAGEE2	-0.13595	0.00145146
BMX	-0.135966	0.00144956
MEGF10	-0.135985	0.00144739
PLAUR	-0.136012	0.00144415
CSMD2	-0.136087	0.00143533
C1orf157	-0.136103	0.00143351
RPS6KL1	-0.136195	0.0014227
XCL1	-0.136222	0.00141955
SLC7A6	-0.136226	0.00141915
PRB1	-0.136289	0.00141182
CHD3	-0.136375	0.00140186
SPATA21	-0.136413	0.00139759
CMKLR1	-0.136434	0.00139511
NCRNA00114	-0.136444	0.00139399
VENTX	-0.136466	0.00139148
ELP4	-0.136466	0.00139146
RAB33A	-0.136514	0.00138607
NT5DC3	-0.136528	0.00138446
PDGFB	-0.136531	0.00138415
ARMC8	-0.136557	0.0013811
PNLIPRP3	-0.136563	0.00138053
NR1D1	-0.136578	0.00137883
SNIP1	-0.136627	0.00137324
CLCA4	-0.136738	0.00136074
XKR3	-0.136749	0.00135957
C2CD4B	-0.136761	0.00135821
SLC26A3	-0.136796	0.00135434
ASCC3	-0.136811	0.0013526
PAFAH2	-0.136812	0.0013525
FAM71C	-0.136821	0.00135158
COL12A1	-0.136823	0.00135132
DEXI	-0.136824	0.00135121
C20orf144	-0.13688	0.00134506
GREM2	-0.13689	0.00134389
DNAJC25-GNG10	-0.136936	0.00133879
SPAM1	-0.136979	0.00133412
SCN10A	-0.137	0.0013318
TM4SF5	-0.137001	0.00133174
UGT1A4	-0.137029	0.00132868
CALN1	-0.137083	0.00132271
DKK2	-0.137086	0.00132242
OR51L1	-0.137149	0.00131561
PTPN5	-0.1372	0.00131009
NAT8L	-0.137241	0.00130564
POU5F2	-0.137255	0.00130413
C1orf84	-0.137284	0.00130098
SOHLH1	-0.137326	0.00129653
RGS16	-0.137329	0.00129624
MS4A10	-0.1374	0.00128866
PCSK1	-0.137419	0.00128662
C5orf56	-0.137439	0.00128451
IFT46	-0.137443	0.00128407
HOXD8	-0.137455	0.00128284
LRIG2	-0.137522	0.00127576
EML5	-0.137526	0.00127535
OPHN1	-0.137542	0.00127367
GDE1	-0.137597	0.00126788
TSKU	-0.137605	0.00126705
HTR3B	-0.137628	0.00126463
PLRG1	-0.137748	0.00125213
KRTAP5-5	-0.137762	0.00125068
P2RY10	-0.137855	0.0012411
STT3B	-0.13788	0.00123851
PLXNB2	-0.137893	0.00123723
LDOC1	-0.137896	0.00123691
TPRG1L	-0.1379	0.00123647
MED4	-0.137925	0.00123391
TRIM45	-0.137926	0.00123386
BCO2	-0.137929	0.00123357
CCR1	-0.137939	0.0012325
PTPRA	-0.137954	0.00123102
USP31	-0.13799	0.00122729
BHLHE22	-0.138267	0.00119945
RTF1	-0.138295	0.0011967
MAGEL2	-0.138365	0.00118978
LOC150185	-0.138409	0.00118547
HEY1	-0.138439	0.00118249
HECA	-0.138503	0.00117625
OBFC1	-0.138597	0.00116711
LOC143188	-0.138608	0.00116601
SLC8A3	-0.138616	0.00116526
RFX1	-0.138739	0.00115336
PRRT2	-0.13876	0.00115133
MPP3	-0.138767	0.00115069
CLCA1	-0.138831	0.00114455
TAS2R38	-0.138924	0.00113572
KRBA2	-0.138939	0.00113436
ESYT2	-0.138999	0.00112867
PARN	-0.139017	0.00112699
SLC15A3	-0.139017	0.00112697
HYI	-0.139042	0.00112466
BTBD7	-0.139046	0.00112426
TOX4	-0.139053	0.00112359
ZNF267	-0.139072	0.00112187
GLB1L	-0.139087	0.00112043
VPS33A	-0.139098	0.00111942
PIGC	-0.139159	0.00111373
ATP2C2	-0.139163	0.0011134
DDX3X	-0.139202	0.00110972
B4GALNT3	-0.139232	0.00110692
RHBDF2	-0.139265	0.00110392
BTBD8	-0.139278	0.00110271
CCDC38	-0.139382	0.00109319
CYCSP52	-0.139409	0.00109075
TMEM119	-0.13943	0.00108882
KCNH6	-0.139486	0.0010837
CCDC102B	-0.139495	0.0010829
SARDH	-0.139554	0.00107754
FSTL3	-0.139596	0.00107383
FAM48A	-0.139609	0.00107261
JOSD1	-0.139646	0.00106934
PSMB11	-0.139648	0.00106913
GNG8	-0.139675	0.00106676
WDR36	-0.139736	0.00106131
FAM149A	-0.139761	0.0010591
CPNE2	-0.139875	0.00104901
HIATL1	-0.139893	0.00104741
CHAC1	-0.139923	0.00104476
SLC25A31	-0.139942	0.00104311
SNORD97	-0.139947	0.00104272
UGCG	-0.139991	0.00103884
FAM131B	-0.140028	0.00103562
CCL1	-0.140035	0.00103502
GOPC	-0.140048	0.00103393
FRG2B	-0.140073	0.00103177
GPD1	-0.140093	0.00103003
TBC1D22A	-0.140199	0.00102085
SPEN	-0.140201	0.00102066
IFI35	-0.140294	0.00101274
LOC440173	-0.140336	0.00100922
PGK1	-0.140338	0.00100901
ZC3H7A	-0.140377	0.00100574
PPP1R3D	-0.140382	0.00100527
AIF1	-0.140385	0.001005
PDK3	-0.140388	0.0010048
LOC100133308	-0.140389	0.00100467
LOC349196	-0.140422	0.00100194
RAB4B	-0.14043	0.00100127
LTB4R2	-0.14048	0.000997022
TCEB3C	-0.14049	0.000996169
FLJ40504	-0.140561	0.000990302
CTDP1	-0.140642	0.000983582
PNLIPRP2	-0.140793	0.000971088
MT1H	-0.140813	0.00096946
LOC595101	-0.140839	0.000967347
TNFRSF10A	-0.140868	0.000964952
TRAK2	-0.140877	0.000964278
WTIP	-0.140923	0.000960537
OR6B2	-0.140975	0.000956292
DOK2	-0.14098	0.000955888
PLCB2	-0.140997	0.000954544
ZDHHC14	-0.141001	0.0009542
MAGEA10	-0.141059	0.000949531
PATE3	-0.141124	0.000944371
GPR68	-0.141126	0.000944189
WHAMM	-0.141155	0.000941924
CITED1	-0.141166	0.000941042
C21orf99	-0.141201	0.000938208
APOB48R	-0.141246	0.000934683
ACOT2	-0.141259	0.000933606
CTAG2	-0.141306	0.000929911
SPINK5	-0.141313	0.000929396
DNM1L	-0.141314	0.000929338
SS18	-0.141318	0.000929013
BEST2	-0.141352	0.000926346
SOCS2	-0.141384	0.000923847
MUC16	-0.141407	0.000922065
RPL10L	-0.14141	0.0009218
CARTPT	-0.141455	0.000918252
ANKRD20A3	-0.141457	0.000918097
CHRNE	-0.141508	0.000914214
TKTL2	-0.141589	0.000907944
DTX2	-0.141639	0.000904109
BCAR1	-0.141641	0.000903934
MGC23270	-0.141682	0.000900769
BLVRB	-0.141714	0.000898324
NRIP3	-0.141725	0.000897501
LOC653113	-0.141734	0.00089682
TOB2	-0.141797	0.000892087
TRPM3	-0.141798	0.000891953
SERPINB11	-0.141799	0.00089187
MAP4K1	-0.141949	0.000880594
PELO	-0.142002	0.00087666
WDR17	-0.142033	0.000874384
ACADS	-0.142051	0.000873054
PTENP1	-0.14207	0.000871627
AKR1C4	-0.142104	0.000869113
ATP6V1E1	-0.14213	0.000867143
AQP7	-0.142137	0.000866689
ZNF546	-0.142145	0.00086607
PCDHGB4	-0.142156	0.000865264
ALPK2	-0.142157	0.000865195
SLC1A1	-0.142193	0.000862577
GOLGA8G	-0.142195	0.000862409
FAM55D	-0.142211	0.000861214
MS4A6A	-0.142223	0.00086033
EMR4P	-0.142243	0.000858867
SENP2	-0.142261	0.000857549
SLC17A7	-0.142326	0.000852818
CD209	-0.142332	0.000852423
NOX5	-0.142342	0.000851666
C17orf67	-0.142389	0.000848278
TDGF1	-0.142468	0.000842564
LOC100130581	-0.142513	0.000839346
HIST1H3F	-0.142542	0.000837312
LMBRD1	-0.142597	0.000833385
PI3	-0.142767	0.000821341
CDK6	-0.142777	0.000820649
NFATC1	-0.142787	0.000819962
EIF5B	-0.142854	0.000815293
CD79A	-0.142883	0.000813257
CSF3	-0.142885	0.000813159
LOC389333	-0.142906	0.000811701
SOCS7	-0.143056	0.000801341
VHLL	-0.143089	0.000799057
C20orf173	-0.143093	0.000798768
RAD21L1	-0.143108	0.000797781
PAK1	-0.143114	0.000797384
HLA-B	-0.143137	0.000795771
LRCH3	-0.143138	0.0007957
FBP2	-0.143239	0.000788909
ABCA9	-0.143323	0.000783202
MFAP1	-0.143336	0.000782361
AKTIP	-0.143366	0.000780342
HBS1L	-0.143413	0.000777227
GOLGA7	-0.143486	0.000772348
ARNT	-0.143527	0.00076965
FAHD2B	-0.143548	0.000768266
SFRP5	-0.143577	0.000766322
HTATSF1	-0.143597	0.000765016
UBQLN3	-0.143654	0.000761326
ITGA4	-0.143743	0.000755521
CREBBP	-0.143838	0.000749371
CD84	-0.143916	0.000744348
EFR3B	-0.143924	0.000743853
CTAG1B	-0.143927	0.000743622
UGT2A3	-0.143949	0.000742241
LRRTM2	-0.144036	0.000736711
CST9	-0.144036	0.000736706
TNK1	-0.144037	0.000736632
NPTX2	-0.144042	0.000736351
ZNF143	-0.144117	0.000731609
PCDH17	-0.144179	0.000727708
PLEKHH3	-0.144193	0.000726825
P2RY6	-0.144249	0.000723343
SUN2	-0.144279	0.00072147
GREB1L	-0.14429	0.00072076
C6orf97	-0.144326	0.000718555
TRIM7	-0.144388	0.000714669
LOC100190938	-0.1444	0.000713976
CD27	-0.144422	0.000712631
ZCWPW1	-0.144442	0.000711374
FLJ11235	-0.144462	0.00071016
KHK	-0.144517	0.000706769
hsa-let-7a-2-3p	-0.144527	0.000706158
LOC646999	-0.144535	0.000705714
ABI2	-0.144558	0.000704272
HDAC4	-0.144627	0.000700092
NUP214	-0.1447	0.000695712
TSPAN5	-0.144717	0.0006947
C1orf212	-0.144782	0.000690781
SBNO1	-0.144799	0.000689765
GGA3	-0.144801	0.000689646
SUSD1	-0.144804	0.00068947
PRTG	-0.144838	0.000687464
DUSP10	-0.144891	0.000684309
STH	-0.145023	0.000676544
LOC153684	-0.145046	0.000675181
TRAT1	-0.145061	0.000674301
TSHR	-0.145072	0.000673656
TEP1	-0.145131	0.000670205
TERF2IP	-0.145171	0.000667909
CYTH4	-0.14518	0.00066738
TYR	-0.145201	0.000666174
INF2	-0.14523	0.000664494
ASAH1	-0.145233	0.000664311
HTR1D	-0.145304	0.000660242
KRT80	-0.145312	0.000659798
ZNF619	-0.145313	0.000659726
ADAP1	-0.145439	0.000652551
RPL23AP82	-0.145518	0.000648111
CALCA	-0.145558	0.000645824
PELI3	-0.145584	0.000644381
AP3S2	-0.145661	0.000640109
FAM45B	-0.145677	0.000639194
DCLK2	-0.14568	0.000639057
PLD2	-0.145695	0.000638211
CD180	-0.145764	0.000634367
MYH3	-0.14577	0.000634068
CD200R1	-0.145896	0.000627133
SLC30A1	-0.145911	0.000626297
SLC37A2	-0.145941	0.000624664
IDE	-0.146019	0.000620455
TEX19	-0.146098	0.000616208
SELENBP1	-0.146111	0.000615494
NEDD1	-0.146116	0.000615217
NPAS2	-0.146133	0.000614284
SLC25A46	-0.146157	0.00061303
SPATA13	-0.146237	0.000608754
C10orf53	-0.146274	0.00060682
OR51Q1	-0.146294	0.000605747
RASAL2	-0.146329	0.000603896
GZMB	-0.146347	0.000602919
TMEM66	-0.146348	0.000602878
PISD	-0.146363	0.000602126
TSC22D1	-0.146378	0.0006013
NBPF22P	-0.146389	0.000600747
RIT1	-0.14658	0.000590807
FGF8	-0.146605	0.000589495
WASF2	-0.146608	0.000589331
HECW2	-0.146612	0.000589153
EPC2	-0.146615	0.000588982
MTF1	-0.146671	0.000586113
CCND1	-0.14669	0.000585115
CDH13	-0.146727	0.00058323
ATP6AP2	-0.146729	0.000583114
KRTAP7-1	-0.146767	0.000581195
PECAM1	-0.14687	0.000575981
ATF2	-0.146884	0.000575264
KRT6B	-0.146885	0.000575232
NMNAT1	-0.146886	0.000575193
ARAP2	-0.146924	0.000573245
OR5H6	-0.146942	0.000572361
COQ10B	-0.147008	0.000569079
PDE8B	-0.147011	0.000568894
APCS	-0.147037	0.000567626
ASTE1	-0.147064	0.000566273
MDFI	-0.147114	0.000563769
KAZ	-0.147194	0.000559843
MAGED4B	-0.14731	0.000554184
TLR7	-0.147331	0.000553164
HELZ	-0.147363	0.000551595
UBASH3A	-0.147372	0.000551158
CXorf21	-0.147419	0.00054887
C6orf192	-0.14747	0.000546445
ZG16	-0.147488	0.000545571
MOGAT1	-0.147495	0.000545208
CBX5	-0.147576	0.000541337
GPR148	-0.147631	0.000538724
MCM3	-0.147637	0.000538457
TMEM185B	-0.147722	0.000534445
FMO3	-0.147737	0.000533729
CCL19	-0.147748	0.000533239
C17orf87	-0.147853	0.0005283
SIGLEC14	-0.147857	0.000528118
XYLT2	-0.147876	0.000527237
ATM	-0.147896	0.000526305
HPCAL4	-0.147898	0.000526213
WNK1	-0.147936	0.000524471
BLZF1	-0.147966	0.000523064
TWSG1	-0.14799	0.000521946
KPNA4	-0.148031	0.000520092
RNF167	-0.14806	0.000518764
LCK	-0.148107	0.000516622
FAM107B	-0.148109	0.000516513
FAM3D	-0.148211	0.000511896
IL8	-0.14824	0.000510551
CD46	-0.148262	0.000509586
MMP7	-0.148318	0.000507069
PLA2R1	-0.148369	0.000504789
EXOG	-0.148422	0.000502405
MGC45800	-0.148514	0.000498341
SLC5A3	-0.148565	0.000496095
KCTD6	-0.148574	0.000495696
MAPKAPK2	-0.14859	0.000495005
ACCN5	-0.148601	0.000494505
KIAA1328	-0.148648	0.000492464
FBXO33	-0.148662	0.000491869
SNORA76	-0.148664	0.00049175
SLC17A1	-0.148738	0.000488567
ARGFX	-0.148803	0.000485747
FUT9	-0.14881	0.000485449
KCTD18	-0.148836	0.000484341
RETSAT	-0.148929	0.000480359
VNN2	-0.148932	0.000480205
SLC6A2	-0.14897	0.000478603
SYT6	-0.149049	0.000475235
TMPRSS11E2	-0.149071	0.000474313
HOXA1	-0.149085	0.000473746
FRMPD2L1	-0.149237	0.00046739
ALDH9A1	-0.149293	0.000465039
ARHGAP21	-0.14932	0.000463955
GPC6	-0.149372	0.000461796
APC	-0.149426	0.000459592
MAPK10	-0.149464	0.000458026
IFNGR1	-0.149597	0.00045264
CLOCK	-0.149612	0.000452043
DYM	-0.149663	0.000449977
CLTCL1	-0.149686	0.000449052
ZNF286A	-0.149688	0.000448964
PLK1S1	-0.149724	0.000447529
AFP	-0.149727	0.000447411
OPRL1	-0.149741	0.000446876
FAM188B	-0.149849	0.00044259
FAM120C	-0.149862	0.000442081
MARCO	-0.149886	0.000441116
SIPA1L2	-0.149929	0.000439412
EIF4H	-0.149942	0.000438914
HIST3H3	-0.149944	0.000438822
SLC27A1	-0.149999	0.00043668
CCDC107	-0.150048	0.000434774
PLVAP	-0.150073	0.00043381
RASD1	-0.150076	0.000433687
RSF1	-0.150102	0.000432673
CYBB	-0.150227	0.00042789
C8orf41	-0.150254	0.000426842
CXorf59	-0.150434	0.000420032
CXCR3	-0.150457	0.000419153
RANBP3	-0.150459	0.000419083
C10orf10	-0.150509	0.000417216
LOC284023	-0.15054	0.000416061
RNF170	-0.150596	0.000413958
HSDL2	-0.150605	0.000413641
FICD	-0.150619	0.000413113
SNORA16A	-0.150625	0.000412892
PREX1	-0.150658	0.000411671
C16orf90	-0.150715	0.000409579
FSCB	-0.15073	0.000409038
CD4	-0.150731	0.000408992
RNF11	-0.150735	0.000408851
FBXO21	-0.150757	0.000408043
C10orf47	-0.150781	0.00040715
ZNF512	-0.150831	0.000405346
TPTE2P1	-0.150857	0.000404382
BMPR2	-0.150875	0.00040372
GPR110	-0.150909	0.000402481
FNDC3B	-0.151042	0.00039772
RDX	-0.15105	0.000397435
GZMK	-0.15109	0.000396003
MYL7	-0.151096	0.000395776
KCNQ3	-0.151135	0.000394389
ZSCAN18	-0.151159	0.00039357
ZDHHC5	-0.151221	0.000391354
DFFA	-0.15124	0.000390694
RHOA	-0.15138	0.000385814
CHD2	-0.1514	0.000385105
PLEKHG4B	-0.151524	0.000380822
PFKM	-0.151532	0.000380561
LOC283914	-0.151558	0.000379656
NR1H3	-0.151592	0.000378481
HUWE1	-0.151594	0.000378444
CRYAA	-0.151693	0.000375062
GBP6	-0.151717	0.000374236
XCL2	-0.151742	0.000373393
ARPC1B	-0.151767	0.000372579
RHOG	-0.151836	0.000370244
RICH2	-0.151837	0.000370207
ZNF295	-0.151906	0.000367915
FCF1	-0.151934	0.000366986
PTPRQ	-0.151969	0.000365812
USP9X	-0.152035	0.000363635
RNF207	-0.152036	0.000363624
DHFRL1	-0.152142	0.000360139
NOVA2	-0.15221	0.000357917
KIAA0831	-0.152278	0.000355735
FBXO48	-0.152391	0.000352121
ZNF426	-0.152391	0.000352098
MUC1	-0.152457	0.000349997
SPDYC	-0.152483	0.000349185
CA3	-0.152492	0.000348911
MGAT5	-0.152507	0.000348426
LUZP4	-0.152534	0.000347572
GJA4	-0.152612	0.000345106
RFX7	-0.152614	0.000345055
SIRPB2	-0.152678	0.000343045
CORO6	-0.152694	0.000342566
MRPL10	-0.152777	0.000339996
SCUBE2	-0.152783	0.000339811
AHCYL1	-0.15279	0.000339588
COX4NB	-0.152791	0.000339563
SH2D2A	-0.15281	0.000338957
ARSE	-0.152814	0.000338856
IL1F10	-0.152843	0.000337968
PAR5	-0.152856	0.000337555
UGT1A5	-0.152875	0.000336958
CD52	-0.152881	0.000336791
PDX1	-0.15295	0.000334686
PLEKHA3	-0.153008	0.000332931
CDC27	-0.153013	0.000332775
C17orf80	-0.153145	0.000328798
ZNF79	-0.153149	0.000328659
PTPN22	-0.153161	0.000328304
C17orf73	-0.153169	0.000328066
ZNF17	-0.153182	0.000327696
SUN3	-0.153186	0.000327571
PRAM1	-0.153215	0.000326715
GNL1	-0.153219	0.00032658
FKBP15	-0.153252	0.000325609
GYG2	-0.153254	0.000325528
IFNB1	-0.153416	0.000320775
PSMB8	-0.15343	0.000320353
RASGEF1B	-0.153451	0.000319748
TAOK1	-0.153479	0.000318923
RNU4ATAC	-0.153481	0.000318876
HAMP	-0.15351	0.000318015
HIST2H2BA	-0.153514	0.000317909
ATP6V0D1	-0.153517	0.000317828
FAM13A	-0.15354	0.000317153
ZFHX3	-0.153543	0.000317078
HIGD1A	-0.153558	0.000316639
CCDC75	-0.153601	0.000315389
PTPRK	-0.153612	0.000315074
PDS5B	-0.153623	0.000314776
SLPI	-0.153627	0.000314639
OXCT2	-0.153634	0.000314445
PTER	-0.153636	0.000314381
PHC1	-0.153651	0.000313949
OR2H1	-0.153673	0.000313328
SAP30L	-0.153705	0.000312413
CTNNBIP1	-0.15371	0.000312264
SLC16A13	-0.153728	0.000311763
SNORA61	-0.153761	0.000310815
[truncated: 5,338 more rows]

## Sheet: Supplementary Table S4
	135 direct candidate target genes		Intersection os selected gene list of Suppl T1, Suppl T2 and Suppl T3
	ACTB
	ADAM10
	AKAP13
	ALDH3A2
	ALKBH5
	ANKRD11
	ANXA6
	AP2M1
	ARHGAP5
	ASH1L
	ATP1B1
	ATP8B1
	ATRX
	BAZ1B
	CALCOCO2
	CALD1
	CALU
	CBL
	CBX5
	CCND1
	CCNT1
	CDC14B
	CDC42BPB
	CDS2
	CELSR1
	CLIP1
	CREB3L2
	CRIM1
	CRK
	CTNNB1
	DLGAP4
	DOCK5
	EGFR
	EIF5B
	EPHX1
	ERLIN1
	FER
	FLII
	FNDC3B
	FOXN3
	GALNT2
	GANC
	GLG1
	GLUL
	GNA11
	GRB2
	HELZ
	HSPH1
	IL6ST
	IQGAP1
	IRF6
	ITGB1
	ITPKB
	KBTBD4
	KLF13
	KPNA6
	LAMP1
	LAPTM4B
	LATS1
	LPGAT1
	LPP
	LRP10
	LRP5
	MAGT1
	MAP3K2
	MAPK7
	MBNL1
	MBTPS1
	MIER1
	MOCS2
	MPRIP
	MTMR6
	MTUS1
	NAV1
	NF1
	NFAT5
	NFIB
	NFIC
	NPHP3
	NT5DC2
	NUCKS1
	NUP214
	OGDH
	PAFAH1B1
	PDP2
	PEA15
	PHACTR2
	PIK3CA
	PRDM2
	PRKAB2
	PRNP
	PSAP
	PTPN11
	QSER1
	RDX
	REV1
	RHOA
	RPRD1A
	RSF1
	SEC23A
	SENP1
	SENP2
	SF3A1
	SLC38A1
	SLC41A2
	SLC5A3
	SNTB2
	SON
	SOS2
	SPEN
	SRGAP1
	SSH1
	ST3GAL1
	TAOK1
	TGOLN2
	TNRC6B
	TOR1AIP1
	TOR1AIP2
	TOX4
	UBXN7
	UGCG
	UGP2
	UHMK1
	USP28
	USP34
	VAMP3
	VAPA
	VEGFA
	WFS1
	WNK1
	YWHAH
	ZBTB38
	ZMAT3
	ZNF609
	ZYG11B

## Sheet: Supplementary Table S5
ID	Gene		List of cell adhesion genes annotated in AMIGO2 GO repository
UniProtKB:P80404	ABAT
UniProtKB:P21439	ABCB4
UniProtKB:Q9NUQ8	ABCF3
UniProtKB:Q8IZP0	ABI1
UniProtKB:Q7Z7G0	ABI3BP
UniProtKB:P00519	ABL1
UniProtKB:P42684	ABL2
UniProtKB:P16112	ACAN
UniProtKB:Q9BYF1	ACE2
UniProtKB:Q5QJU3	ACER2
UniProtKB:P22303	ACHE
UniProtKB:O00590	ACKR2
UniProtKB:P25106	ACKR3
UniProtKB:Q9NPB9	ACKR4
UniProtKB:P60709	ACTB
UniProtKB:P68032	ACTC1
UniProtKB:P63261	ACTG1
UniProtKB:P12814	ACTN1
UniProtKB:P35609	ACTN2
UniProtKB:Q08043	ACTN3
UniProtKB:O43707	ACTN4
UniProtKB:P61160	ACTR2
UniProtKB:P61158	ACTR3
UniProtKB:Q04771	ACVR1
UniProtKB:P37023	ACVRL1
UniProtKB:P00813	ADA
UniProtKB:O14672	ADAM10
UniProtKB:O75078	ADAM11
UniProtKB:O43184	ADAM12
UniProtKB:Q13444	ADAM15
UniProtKB:P78536	ADAM17
UniProtKB:Q9H013	ADAM19
UniProtKB:Q99965	ADAM2
UniProtKB:Q9P0K1	ADAM22
UniProtKB:O75077	ADAM23
UniProtKB:P78325	ADAM8
UniProtKB:Q13443	ADAM9
UniProtKB:O15204	ADAMDEC1
UniProtKB:P58397	ADAMTS12
UniProtKB:Q76LX8	ADAMTS13
UniProtKB:Q8TE60	ADAMTS18
UniProtKB:Q9UNA0	ADAMTS5
UniProtKB:Q9UP79	ADAMTS8
UniProtKB:Q9P2N4	ADAMTS9
UniProtKB:P35611	ADD1
UniProtKB:P35612	ADD2
UniProtKB:Q86SQ6	ADGRA1
UniProtKB:Q96PE1	ADGRA2
UniProtKB:Q8IWK6	ADGRA3
UniProtKB:O14514	ADGRB1
UniProtKB:O60241	ADGRB2
UniProtKB:O60242	ADGRB3
UniProtKB:Q6QNK2	ADGRD1
UniProtKB:Q7Z7M1	ADGRD2
UniProtKB:Q14246	ADGRE1
UniProtKB:Q9UHX3	ADGRE2
UniProtKB:Q9BY15	ADGRE3
UniProtKB:Q86SQ3	ADGRE4P
UniProtKB:Q5T601	ADGRF1
UniProtKB:Q8IZF7	ADGRF2
UniProtKB:Q8IZF5	ADGRF3
UniProtKB:Q8IZF3	ADGRF4
UniProtKB:Q8IZF2	ADGRF5
UniProtKB:Q9Y653	ADGRG1
UniProtKB:Q8IZP9	ADGRG2
UniProtKB:Q86Y34	ADGRG3
UniProtKB:Q8IZF6	ADGRG4
UniProtKB:Q8IZF4	ADGRG5
UniProtKB:Q86SQ4	ADGRG6
UniProtKB:Q96K78	ADGRG7
UniProtKB:O94910	ADGRL1
UniProtKB:O95490	ADGRL2
UniProtKB:Q9HAR2	ADGRL3
UniProtKB:Q9HBW9	ADGRL4
UniProtKB:Q8WXG9	ADGRV1
UniProtKB:Q15848	ADIPOQ
UniProtKB:P29274	ADORA2A
UniProtKB:Q16186	ADRM1
UniProtKB:Q96IZ2	ADTRP
UniProtKB:Q8N556	AFAP1
UniProtKB:P55196	AFDN
UniProtKB:Q15109	AGER
UniProtKB:Q8N302	AGGF1
UniProtKB:O95994	AGR2
UniProtKB:Q09666	AHNAK
UniProtKB:O95433	AHSA1
UniProtKB:P55008	AIF1
UniProtKB:Q9BQI0	AIF1L
UniProtKB:Q9UKB5	AJAP1
UniProtKB:Q96IF1	AJUBA
UniProtKB:Q02952	AKAP12
UniProtKB:Q9NQ31	AKIP1
UniProtKB:Q7Z591	AKNA
UniProtKB:P31749	AKT1
UniProtKB:Q13740	ALCAM
UniProtKB:P04075	ALDOA
UniProtKB:Q3KRA9	ALKBH6
UniProtKB:P18054	ALOX12
UniProtKB:P16050	ALOX15
UniProtKB:P09917	ALOX5
UniProtKB:Q9NP70	AMBN
UniProtKB:P02760	AMBP
UniProtKB:Q99217	AMELX
UniProtKB:Q86WK6	AMIGO1
UniProtKB:Q86SJ2	AMIGO2
UniProtKB:Q86WK7	AMIGO3
UniProtKB:Q6UX39	AMTN
UniProtKB:Q15389	ANGPT1
UniProtKB:O15123	ANGPT2
UniProtKB:Q9Y5C1	ANGPTL3
UniProtKB:Q12955	ANK3
UniProtKB:Q9NQW6	ANLN
UniProtKB:P23352	ANOS1
UniProtKB:Q9H6X2	ANTXR1
UniProtKB:P04083	ANXA1
UniProtKB:P07355	ANXA2
UniProtKB:P08758	ANXA5
UniProtKB:P08133	ANXA6
UniProtKB:P20073	ANXA7
UniProtKB:O76027	ANXA9
UniProtKB:Q16853	AOC3
UniProtKB:Q63HQ0	AP1AR
UniProtKB:O00203	AP3B1
UniProtKB:O14617	AP3D1
UniProtKB:Q02410	APBA1
UniProtKB:Q7Z5R6	APBB1IP
UniProtKB:P25054	APC
UniProtKB:P51693	APLP1
UniProtKB:P02647	APOA1
UniProtKB:P06727	APOA4
UniProtKB:P05090	APOD
UniProtKB:P05067	APP
UniProtKB:P84077	ARF1
UniProtKB:P62330	ARF6
UniProtKB:P53365	ARFIP2
UniProtKB:P05089	ARG1
UniProtKB:P78540	ARG2
UniProtKB:Q9NWB6	ARGLU1
UniProtKB:Q07960	ARHGAP1
UniProtKB:Q8N392	ARHGAP18
UniProtKB:Q7Z5H3	ARHGAP22
UniProtKB:Q8N264	ARHGAP24
UniProtKB:Q9UNA1	ARHGAP26
UniProtKB:Q2M1Z3	ARHGAP31
UniProtKB:Q13017	ARHGAP5
UniProtKB:O43182	ARHGAP6
UniProtKB:P52565	ARHGDIA
UniProtKB:P52566	ARHGDIB
UniProtKB:Q99819	ARHGDIG
UniProtKB:Q5VV41	ARHGEF16
UniProtKB:Q92974	ARHGEF2
UniProtKB:Q14155	ARHGEF7
UniProtKB:Q8N8R7	ARL14EP
UniProtKB:P36404	ARL2
UniProtKB:Q96C12	ARMC5
UniProtKB:O15143	ARPC1B
UniProtKB:O15144	ARPC2
UniProtKB:O15145	ARPC3
UniProtKB:O15511	ARPC5
UniProtKB:Q9BPX5	ARPC5L
UniProtKB:O00192	ARVCF
UniProtKB:Q9ULH1	ASAP1
UniProtKB:Q8TDY4	ASAP3
UniProtKB:P00966	ASS1
UniProtKB:Q6HA08	ASTL
UniProtKB:O14525	ASTN1
UniProtKB:Q5SQI0	ATAT1
UniProtKB:P31939	ATIC
UniProtKB:Q13315	ATM
UniProtKB:P05026	ATP1B1
UniProtKB:P14415	ATP1B2
UniProtKB:P16615	ATP2A2
UniProtKB:P98194	ATP2C1
UniProtKB:P51164	ATP4B
UniProtKB:P06576	ATP5F1B
UniProtKB:P27449	ATP6V0C
UniProtKB:Q8WWM7	ATXN2L
UniProtKB:P54252	ATXN3
UniProtKB:O75366	AVIL
UniProtKB:P30530	AXL
UniProtKB:P25311	AZGP1
UniProtKB:P20160	AZU1
UniProtKB:P61769	B2M
UniProtKB:Q8NHY0	B4GALNT2
UniProtKB:P15291	B4GALT1
UniProtKB:Q92934	BAD
UniProtKB:O95817	BAG3
UniProtKB:O95429	BAG4
UniProtKB:Q9UQB8	BAIAP2
UniProtKB:Q9UHR4	BAIAP2L1
UniProtKB:P50895	BCAM
UniProtKB:Q96GW7	BCAN
UniProtKB:P56945	BCAR1
UniProtKB:O75815	BCAR3
UniProtKB:Q9H6U6	BCAS3
UniProtKB:O95999	BCL10
UniProtKB:P10415	BCL2
UniProtKB:O43521	BCL2L11
UniProtKB:P41182	BCL6
UniProtKB:P11274	BCR
UniProtKB:P02818	BGLAP
UniProtKB:Q9NUP1	BLOC1S4
UniProtKB:O95393	BMP10
UniProtKB:P12643	BMP2
UniProtKB:P12644	BMP4
UniProtKB:P22003	BMP5
UniProtKB:P22004	BMP6
UniProtKB:P18075	BMP7
UniProtKB:Q13873	BMPR2
UniProtKB:P51813	BMX
UniProtKB:Q9BWV1	BOC
UniProtKB:Q9NP55	BPIFA1
UniProtKB:P35613	BSG
UniProtKB:Q10588	BST1
UniProtKB:Q7Z6A9	BTLA
UniProtKB:Q8WVV5	BTN2A2
UniProtKB:Q8NE79	BVES
UniProtKB:Q7L1Q6	BZW1
UniProtKB:Q9Y6E2	BZW2
UniProtKB:Q07021	C1QBP
UniProtKB:Q9BXJ1	C1QTNF1
UniProtKB:Q8NCU7	C2CD4A
UniProtKB:A6NLJ0	C2CD4B
UniProtKB:Q9BY67	CADM1
UniProtKB:Q8N3J6	CADM2
UniProtKB:Q8N126	CADM3
UniProtKB:Q8NFZ8	CADM4
UniProtKB:Q05682	CALD1
UniProtKB:P27797	CALR
UniProtKB:P49069	CAMLG
UniProtKB:Q9P1Y5	CAMSAP3
UniProtKB:Q01518	CAP1
UniProtKB:P40121	CAPG
UniProtKB:P07384	CAPN1
UniProtKB:P17655	CAPN2
UniProtKB:O15484	CAPN5
UniProtKB:P52907	CAPZA1
UniProtKB:P47756	CAPZB
UniProtKB:Q9BXL7	CARD11
UniProtKB:Q5VZK9	CARMIL1
UniProtKB:O14936	CASK
UniProtKB:P42574	CASP3
UniProtKB:P41180	CASR
UniProtKB:Q9NQ75	CASS4
UniProtKB:P20810	CAST
UniProtKB:P04040	CAT
UniProtKB:Q03135	CAV1
UniProtKB:P51636	CAV2
UniProtKB:P56539	CAV3
UniProtKB:Q13951	CBFB
UniProtKB:P22681	CBL
UniProtKB:Q75N03	CBLL1
UniProtKB:Q8N7E2	CBLL2
UniProtKB:P23435	CBLN1
UniProtKB:Q6P1N0	CC2D1A
UniProtKB:Q76M96	CCDC80
UniProtKB:A6NC98	CCDC88B
UniProtKB:P51671	CCL11
UniProtKB:Q99731	CCL19
UniProtKB:P13500	CCL2
UniProtKB:O00585	CCL21
UniProtKB:O15444	CCL25
UniProtKB:Q9NRJ3	CCL28
UniProtKB:P13236	CCL4
UniProtKB:P13501	CCL5
UniProtKB:Q9NUG4	CCM2L
UniProtKB:O00622	CCN1
UniProtKB:P29279	CCN2
UniProtKB:P48745	CCN3
UniProtKB:O95388	CCN4
UniProtKB:O76076	CCN5
UniProtKB:O95389	CCN6
UniProtKB:O95067	CCNB2
UniProtKB:P32246	CCR1
UniProtKB:P46092	CCR10
UniProtKB:P41597	CCR2
UniProtKB:P51677	CCR3
UniProtKB:P51679	CCR4
UniProtKB:P51681	CCR5
UniProtKB:P51684	CCR6
UniProtKB:P32248	CCR7
UniProtKB:P51685	CCR8
UniProtKB:P51686	CCR9
UniProtKB:O00421	CCRL2
UniProtKB:O14618	CCS
UniProtKB:P50990	CCT8
UniProtKB:P48509	CD151
UniProtKB:O95971	CD160
UniProtKB:Q04900	CD164
UniProtKB:Q8N6Q3	CD177
UniProtKB:P15813	CD1D
UniProtKB:P06729	CD2
UniProtKB:P41217	CD200
UniProtKB:Q8TD46	CD200R1
UniProtKB:Q9NNX6	CD209
UniProtKB:P20273	CD22
UniProtKB:Q15762	CD226
UniProtKB:P25063	CD24
UniProtKB:P26842	CD27
UniProtKB:Q9NZQ7	CD274
UniProtKB:Q5ZPR3	CD276
UniProtKB:P10747	CD28
UniProtKB:Q9Y5K6	CD2AP
UniProtKB:Q9UGN4	CD300A
UniProtKB:P20138	CD33
UniProtKB:P28906	CD34
UniProtKB:P16671	CD36
UniProtKB:P07766	CD3E
UniProtKB:P01730	CD4
UniProtKB:P29965	CD40LG
UniProtKB:P16070	CD44
UniProtKB:P15529	CD46
UniProtKB:Q08722	CD47
UniProtKB:P06127	CD5
UniProtKB:P08174	CD55
UniProtKB:P19256	CD58
UniProtKB:P13987	CD59
UniProtKB:P30203	CD6
UniProtKB:P08962	CD63
UniProtKB:P32970	CD70
UniProtKB:P21854	CD72
UniProtKB:P04233	CD74
UniProtKB:P33681	CD80
UniProtKB:P60033	CD81
UniProtKB:Q01151	CD83
UniProtKB:Q9UIB8	CD84
UniProtKB:P42081	CD86
UniProtKB:P21926	CD9
UniProtKB:Q9NPY3	CD93
UniProtKB:P40200	CD96
UniProtKB:P48960	CD97
UniProtKB:P14209	CD99
UniProtKB:Q8TCZ2	CD99L2
UniProtKB:P60953	CDC42
UniProtKB:Q00587	CDC42EP1
UniProtKB:P12830	CDH1
UniProtKB:Q9Y6N8	CDH10
UniProtKB:P55287	CDH11
UniProtKB:P55289	CDH12
UniProtKB:P55290	CDH13
UniProtKB:P55291	CDH15
UniProtKB:O75309	CDH16
UniProtKB:Q12864	CDH17
UniProtKB:Q13634	CDH18
UniProtKB:Q9H159	CDH19
UniProtKB:P19022	CDH2
UniProtKB:Q9HBT6	CDH20
UniProtKB:Q9UJ99	CDH22
UniProtKB:Q9H251	CDH23
UniProtKB:Q86UP0	CDH24
UniProtKB:Q8IXH8	CDH26
UniProtKB:P22223	CDH3
UniProtKB:P55283	CDH4
UniProtKB:P33151	CDH5
UniProtKB:P55285	CDH6
UniProtKB:Q9ULB5	CDH7
UniProtKB:P55286	CDH8
UniProtKB:Q9ULB4	CDH9
UniProtKB:Q96JP9	CDHR1
UniProtKB:Q9BYE9	CDHR2
UniProtKB:Q6ZTQ4	CDHR3
UniProtKB:A6H8M9	CDHR4
UniProtKB:Q9HBB8	CDHR5
UniProtKB:Q00535	CDK5
UniProtKB:Q15078	CDK5R1
UniProtKB:Q00534	CDK6
UniProtKB:P42771	CDKN2A
UniProtKB:Q4KMG0	CDON
UniProtKB:Q15517	CDSN
UniProtKB:P13688	CEACAM1
UniProtKB:Q2WEN9	CEACAM16
UniProtKB:Q7Z692	CEACAM19
UniProtKB:Q6UY09	CEACAM20
UniProtKB:Q3KPI0	CEACAM21
UniProtKB:P40198	CEACAM3
UniProtKB:O75871	CEACAM4
UniProtKB:P06731	CEACAM5
UniProtKB:P40199	CEACAM6
UniProtKB:Q14002	CEACAM7
UniProtKB:P31997	CEACAM8
UniProtKB:P17676	CEBPB
UniProtKB:P19835	CEL
UniProtKB:P08217	CELA2A
UniProtKB:Q9NYQ6	CELSR1
UniProtKB:Q9HCU4	CELSR2
UniProtKB:Q9NYQ7	CELSR3
UniProtKB:Q9UHN6	CEMIP2
UniProtKB:Q5T4B2	CERCAM
UniProtKB:Q9UEE9	CFDP1
UniProtKB:P23528	CFL1
UniProtKB:Q9P2M7	CGN
UniProtKB:Q99674	CGREF1
UniProtKB:O00533	CHL1
UniProtKB:Q9UQN3	CHMP2B
UniProtKB:Q9H444	CHMP4B
UniProtKB:Q9NZZ3	CHMP5
UniProtKB:Q99653	CHP1
UniProtKB:Q9H2X0	CHRD
UniProtKB:O43529	CHST10
UniProtKB:Q8NCG5	CHST4
UniProtKB:Q99828	CIB1
UniProtKB:O75838	CIB2
UniProtKB:Q8TCG1	CIP2A
UniProtKB:Q99967	CITED2
UniProtKB:Q14008	CKAP5
UniProtKB:Q7Z460	CLASP1
UniProtKB:O75122	CLASP2
UniProtKB:Q9UQC9	CLCA2
UniProtKB:O95832	CLDN1
UniProtKB:P78369	CLDN10
UniProtKB:O75508	CLDN11
UniProtKB:P56749	CLDN12
UniProtKB:O95500	CLDN14
UniProtKB:P56746	CLDN15
UniProtKB:Q9Y5I7	CLDN16
UniProtKB:P56750	CLDN17
UniProtKB:P56856	CLDN18
UniProtKB:Q8N6F1	CLDN19
UniProtKB:P57739	CLDN2
UniProtKB:P56880	CLDN20
UniProtKB:Q8N7P3	CLDN22
UniProtKB:Q96B33	CLDN23
UniProtKB:O15551	CLDN3
UniProtKB:O14493	CLDN4
UniProtKB:O00501	CLDN5
UniProtKB:P56747	CLDN6
UniProtKB:O95471	CLDN7
UniProtKB:P56748	CLDN8
UniProtKB:O95484	CLDN9
UniProtKB:Q9UMR7	CLEC4A
UniProtKB:Q6UXB4	CLEC4G
UniProtKB:Q9H2X3	CLEC4M
UniProtKB:Q8IZS7	CLECL1
UniProtKB:O00299	CLIC1
UniProtKB:Q14677	CLINT1
UniProtKB:O94985	CLSTN1
UniProtKB:Q9H4D0	CLSTN2
UniProtKB:Q9BQT9	CLSTN3
UniProtKB:Q00610	CLTC
UniProtKB:P51911	CNN1
UniProtKB:Q99439	CNN2
UniProtKB:Q15417	CNN3
UniProtKB:Q12860	CNTN1
UniProtKB:Q02246	CNTN2
UniProtKB:Q9P232	CNTN3
UniProtKB:Q8IWV2	CNTN4
UniProtKB:O94779	CNTN5
UniProtKB:Q9UQ52	CNTN6
UniProtKB:P78357	CNTNAP1
UniProtKB:Q9UHC6	CNTNAP2
UniProtKB:Q9BZ76	CNTNAP3
UniProtKB:Q96NU0	CNTNAP3B
UniProtKB:Q9C0A0	CNTNAP4
UniProtKB:Q8WYK1	CNTNAP5
UniProtKB:Q53SF7	COBLL1
UniProtKB:Q99715	COL12A1
UniProtKB:Q5TAT6	COL13A1
UniProtKB:Q05707	COL14A1
UniProtKB:P39059	COL15A1
UniProtKB:Q07092	COL16A1
UniProtKB:Q9UMD9	COL17A1
UniProtKB:P39060	COL18A1
UniProtKB:Q14993	COL19A1
UniProtKB:P02452	COL1A1
UniProtKB:Q96A83	COL26A1
UniProtKB:Q2UY09	COL28A1
UniProtKB:P02461	COL3A1
UniProtKB:Q01955	COL4A3
UniProtKB:Q14031	COL4A6
UniProtKB:P20908	COL5A1
UniProtKB:P25940	COL5A3
UniProtKB:P12109	COL6A1
UniProtKB:P12110	COL6A2
UniProtKB:P12111	COL6A3
UniProtKB:A8TX70	COL6A5
UniProtKB:A6NMZ7	COL6A6
UniProtKB:Q02388	COL7A1
UniProtKB:P27658	COL8A1
UniProtKB:P25067	COL8A2
UniProtKB:Q5KU26	COLEC12
UniProtKB:P49747	COMP
UniProtKB:P31146	CORO1A
UniProtKB:Q9BR76	CORO1B
UniProtKB:Q9ULV4	CORO1C
UniProtKB:Q9UQ03	CORO2B
UniProtKB:P16870	CPE
UniProtKB:O75131	CPNE3
UniProtKB:P82279	CRB1
UniProtKB:Q5IJ48	CRB2
UniProtKB:P16562	CRISP2
UniProtKB:P46108	CRK
UniProtKB:P46109	CRKL
UniProtKB:Q9UBG3	CRNN
UniProtKB:O95727	CRTAM
UniProtKB:P09603	CSF1
UniProtKB:Q99062	CSF3R
UniProtKB:P41240	CSK
UniProtKB:P48730	CSNK1D
UniProtKB:Q6UVK1	CSPG4
UniProtKB:O95196	CSPG5
UniProtKB:P21291	CSRP1
UniProtKB:Q16527	CSRP2
UniProtKB:P01040	CSTA
UniProtKB:P16410	CTLA4
UniProtKB:P35221	CTNNA1
UniProtKB:P26232	CTNNA2
UniProtKB:Q9UI47	CTNNA3
UniProtKB:Q9UBT7	CTNNAL1
UniProtKB:P35222	CTNNB1
UniProtKB:O60716	CTNND1
UniProtKB:Q9UQB3	CTNND2
UniProtKB:Q14247	CTTN
UniProtKB:Q86UP6	CUZD1
UniProtKB:P78423	CX3CL1
UniProtKB:P49238	CX3CR1
UniProtKB:P78310	CXADR
UniProtKB:P48061	CXCL12
UniProtKB:O43927	CXCL13
UniProtKB:P10145	CXCL8
UniProtKB:P25024	CXCR1
UniProtKB:P25025	CXCR2
UniProtKB:P49682	CXCR3
UniProtKB:P61073	CXCR4
UniProtKB:P32302	CXCR5
UniProtKB:O00574	CXCR6
UniProtKB:P13498	CYBA
UniProtKB:Q7L576	CYFIP1
UniProtKB:Q96F07	CYFIP2
UniProtKB:Q9NQC7	CYLD
UniProtKB:Q16678	CYP1B1
UniProtKB:Q15438	CYTH1
UniProtKB:O43739	CYTH3
UniProtKB:O60759	CYTIP
UniProtKB:O75553	DAB1
UniProtKB:P98082	DAB2
UniProtKB:Q5VWQ8	DAB2IP
UniProtKB:Q5SW24	DACT2
UniProtKB:Q14118	DAG1
UniProtKB:O43293	DAPK3
UniProtKB:Q16643	DBN1
UniProtKB:Q9UJU6	DBNL
UniProtKB:Q58WW2	DCAF6
UniProtKB:Q96JQ0	DCHS1
UniProtKB:Q6V1P9	DCHS2
UniProtKB:Q9UJW0	DCTN4
UniProtKB:Q08345	DDR1
UniProtKB:Q16832	DDR2
UniProtKB:O00571	DDX3X
UniProtKB:P26196	DDX6
UniProtKB:Q96PH6	DEFB118
UniProtKB:Q8IWF6	DENND6A
UniProtKB:P98153	DGCR2
UniProtKB:Q14129	DGCR6
UniProtKB:Q7Z478	DHX29
UniProtKB:Q9NSV4	DIAPH3
UniProtKB:Q9NRI5	DISC1
UniProtKB:Q155Q3	DIXDC1
UniProtKB:Q96QB1	DLC1
UniProtKB:Q12959	DLG1
UniProtKB:Q15700	DLG2
UniProtKB:Q92796	DLG3
UniProtKB:P78352	DLG4
UniProtKB:Q8TDM6	DLG5
UniProtKB:O00548	DLL1
UniProtKB:Q13316	DMP1
UniProtKB:Q08495	DMTN
UniProtKB:Q96EY1	DNAJA3
UniProtKB:P25685	DNAJB1
UniProtKB:O75190	DNAJB6
UniProtKB:P50570	DNM2
UniProtKB:Q14185	DOCK1
UniProtKB:Q9H7D0	DOCK5
UniProtKB:Q96N67	DOCK7
UniProtKB:Q8NF50	DOCK8
UniProtKB:Q9BZ29	DOCK9
UniProtKB:P27487	DPP4
UniProtKB:Q07507	DPT
UniProtKB:Q08554	DSC1
UniProtKB:Q02487	DSC2
UniProtKB:Q14574	DSC3
UniProtKB:O60469	DSCAM
UniProtKB:Q8TD84	DSCAML1
UniProtKB:Q02413	DSG1
UniProtKB:Q14126	DSG2
UniProtKB:P32926	DSG3
UniProtKB:Q86SJ6	DSG4
UniProtKB:P15924	DSP
UniProtKB:Q03001	DST
UniProtKB:Q86Y01	DTX1
UniProtKB:P28562	DUSP1
UniProtKB:Q9Y6W6	DUSP10
UniProtKB:Q9NRW4	DUSP22
UniProtKB:Q9BV47	DUSP26
UniProtKB:P51452	DUSP3
UniProtKB:O75923	DYSF
UniProtKB:Q14213	EBI3
UniProtKB:O94769	ECM2
UniProtKB:Q92838	EDA
UniProtKB:O43854	EDIL3
UniProtKB:P29692	EEF1D
UniProtKB:P26641	EEF1G
UniProtKB:P13639	EEF2
UniProtKB:Q96C19	EFHD2
UniProtKB:P20827	EFNA1
UniProtKB:P52803	EFNA5
UniProtKB:P98172	EFNB1
UniProtKB:P52799	EFNB2
UniProtKB:Q15768	EFNB3
UniProtKB:O43281	EFS
UniProtKB:Q8IUX8	EGFL6
UniProtKB:Q9UHF1	EGFL7
UniProtKB:Q63HQ2	EGFLAM
UniProtKB:P00533	EGFR
UniProtKB:Q06889	EGR3
UniProtKB:Q9H4M9	EHD1
UniProtKB:Q9NZN3	EHD3
UniProtKB:Q9H223	EHD4
UniProtKB:Q9BY44	EIF2A
UniProtKB:P41091	EIF2S3
UniProtKB:P60228	EIF3E
UniProtKB:P78344	EIF4G2
UniProtKB:Q15056	EIF4H
UniProtKB:P55010	EIF5
UniProtKB:P08246	ELANE
UniProtKB:Q96JJ3	ELMO2
UniProtKB:Q6PCB8	EMB
UniProtKB:P50402	EMD
UniProtKB:Q9Y6C2	EMILIN1
UniProtKB:Q9BXX0	EMILIN2
UniProtKB:P54851	EMP2
UniProtKB:Q8N8S7	ENAH
UniProtKB:P17813	ENG
UniProtKB:P06733	ENO1
UniProtKB:P49961	ENTPD1
UniProtKB:O43491	EPB41L2
UniProtKB:Q9H329	EPB41L4B
UniProtKB:Q9HCM4	EPB41L5
UniProtKB:P16422	EPCAM
UniProtKB:Q9UM22	EPDR1
UniProtKB:P21709	EPHA1
UniProtKB:P29317	EPHA2
UniProtKB:P29320	EPHA3
UniProtKB:P54764	EPHA4
UniProtKB:Q15375	EPHA7
UniProtKB:P29322	EPHA8
UniProtKB:P54762	EPHB1
UniProtKB:P54753	EPHB3
UniProtKB:P54760	EPHB4
UniProtKB:O95208	EPN2
UniProtKB:P01588	EPO
UniProtKB:P42566	EPS15
UniProtKB:Q9UBC2	EPS15L1
UniProtKB:Q8TE68	EPS8L1
UniProtKB:Q9H6S3	EPS8L2
UniProtKB:P04626	ERBB2
UniProtKB:P21860	ERBB3
UniProtKB:Q96RT1	ERBIN
UniProtKB:Q8IUD2	ERC1
UniProtKB:Q96AP7	ESAM
UniProtKB:Q9NQ30	ESM1
UniProtKB:A0FGR8	ESYT2
UniProtKB:P14921	ETS1
UniProtKB:Q9UI08	EVL
UniProtKB:Q92817	EVPL
UniProtKB:O60645	EXOC3
UniProtKB:P15311	EZR
UniProtKB:Q9Y624	F11R
UniProtKB:Q13158	FADD
UniProtKB:Q9UNN5	FAF1
UniProtKB:O95990	FAM107A
UniProtKB:Q9NUQ9	FAM49B
UniProtKB:Q12884	FAP
UniProtKB:O94887	FARP2
UniProtKB:P49327	FASN
UniProtKB:Q14517	FAT1
UniProtKB:Q9NYQ8	FAT2
UniProtKB:Q8TDW7	FAT3
UniProtKB:Q6V0I7	FAT4
UniProtKB:Q8WUP2	FBLIM1
UniProtKB:P23142	FBLN1
UniProtKB:P98095	FBLN2
UniProtKB:Q9UBX5	FBLN5
UniProtKB:Q53RD9	FBLN7
UniProtKB:P35555	FBN1
UniProtKB:P06734	FCER2
UniProtKB:P31994	FCGR2B
UniProtKB:P16591	FER
UniProtKB:Q9BQL6	FERMT1
UniProtKB:Q96AC1	FERMT2
UniProtKB:Q86UX7	FERMT3
UniProtKB:P07332	FES
UniProtKB:Q99689	FEZ1
UniProtKB:P02671	FGA
UniProtKB:P02675	FGB
UniProtKB:P05230	FGF1
UniProtKB:P09038	FGF2
UniProtKB:P22607	FGFR3
UniProtKB:Q8N441	FGFRL1
UniProtKB:P02679	FGG
UniProtKB:Q08830	FGL1
UniProtKB:Q14314	FGL2
UniProtKB:Q13642	FHL1
UniProtKB:Q14192	FHL2
UniProtKB:Q13643	FHL3
UniProtKB:O43427	FIBP
UniProtKB:Q8NFG4	FLCN
UniProtKB:Q5D862	FLG2
UniProtKB:Q13045	FLII
UniProtKB:P21333	FLNA
UniProtKB:O75369	FLNB
UniProtKB:Q14315	FLNC
UniProtKB:O75955	FLOT1
UniProtKB:Q14254	FLOT2
UniProtKB:Q9NZU1	FLRT1
UniProtKB:O43155	FLRT2
UniProtKB:Q9NZU0	FLRT3
UniProtKB:P17948	FLT1
UniProtKB:Q68DA7	FMN1
UniProtKB:Q96PY5	FMNL2
UniProtKB:P02751	FN1
UniProtKB:Q5T0N5	FNBP1L
UniProtKB:Q9Y2H6	FNDC3A
UniProtKB:Q5VW36	FOCAD
UniProtKB:P55317	FOXA1
UniProtKB:Q9Y261	FOXA2
UniProtKB:Q99958	FOXC2
UniProtKB:Q12946	FOXF1
UniProtKB:Q92949	FOXJ1
UniProtKB:Q9BZS1	FOXP3
UniProtKB:P25090	FPR2
UniProtKB:Q5H8C1	FREM1
UniProtKB:Q5SZK8	FREM2
UniProtKB:P0C091	FREM3
UniProtKB:Q7Z6J6	FRMD5
UniProtKB:Q16658	FSCN1
UniProtKB:O95633	FSTL3
UniProtKB:P19526	FUT1
UniProtKB:Q10981	FUT2
UniProtKB:P21217	FUT3
UniProtKB:P22083	FUT4
UniProtKB:Q11130	FUT7
UniProtKB:Q9Y231	FUT9
UniProtKB:Q96DB9	FXYD5
UniProtKB:Q5VWT5	FYB2
UniProtKB:P06241	FYN
UniProtKB:Q9UP38	FZD1
UniProtKB:Q14332	FZD2
UniProtKB:Q9ULV1	FZD4
UniProtKB:O75084	FZD7
UniProtKB:Q13283	G3BP1
UniProtKB:O14976	GAK
UniProtKB:Q14C86	GAPVD1
UniProtKB:Q14393	GAS6
UniProtKB:P15976	GATA1
UniProtKB:P23771	GATA3
UniProtKB:Q9BWX5	GATA5
UniProtKB:P32455	GBP1
UniProtKB:Q92616	GCN1
UniProtKB:Q02742	GCNT1
UniProtKB:Q8N0V5	GCNT2
UniProtKB:P50395	GDI2
UniProtKB:Q6Y7W6	GIGYF2
UniProtKB:O14908	GIPC1
UniProtKB:Q9Y2X7	GIT1
UniProtKB:Q14161	GIT2
UniProtKB:P17302	GJA1
UniProtKB:Q6ZMI3	GLDN
UniProtKB:P10070	GLI2
UniProtKB:P10071	GLI3
UniProtKB:Q92990	GLMN
UniProtKB:Q9HC38	GLOD4
UniProtKB:Q8IVK1	GLYCAM1
UniProtKB:Q03113	GNA12
UniProtKB:Q14344	GNA13
UniProtKB:Q5JWF2	GNAS
UniProtKB:P62879	GNB2
UniProtKB:Q9Y223	GNE
UniProtKB:P01148	GNRH1
UniProtKB:Q08379	GOLGA2
UniProtKB:Q08378	GOLGA3
UniProtKB:Q9H4A6	GOLPH3
UniProtKB:P07359	GP1BA
UniProtKB:P13224	GP1BB
UniProtKB:P40197	GP5
UniProtKB:P14770	GP9
UniProtKB:Q9HCL2	GPAM
UniProtKB:O75487	GPC4
UniProtKB:Q9Y625	GPC6
UniProtKB:Q13491	GPM6B
UniProtKB:Q14956	GPNMB
UniProtKB:P46093	GPR4
UniProtKB:Q8NFJ5	GPRC5A
UniProtKB:O75791	GRAP2
UniProtKB:P62993	GRB2
UniProtKB:Q14451	GRB7
UniProtKB:O60565	GREM1
UniProtKB:Q6ISB3	GRHL2
UniProtKB:O43424	GRID2
UniProtKB:P49841	GSK3B
UniProtKB:P06396	GSN
UniProtKB:P09211	GSTP1
UniProtKB:Q9BZE4	GTPBP4
UniProtKB:Q92522	H1FX
UniProtKB:H3BM21	H3BM21
UniProtKB:P68431	H3C1
UniProtKB:Q14520	HABP2
UniProtKB:Q9P035	HACD3
UniProtKB:P10915	HAPLN1
UniProtKB:Q9GZV7	HAPLN2
UniProtKB:Q96S86	HAPLN3
UniProtKB:Q86UW8	HAPLN4
UniProtKB:Q92839	HAS1
UniProtKB:Q92819	HAS2
UniProtKB:Q8TDQ0	HAVCR2
UniProtKB:P68871	HBB
UniProtKB:P51610	HCFC1
UniProtKB:P08631	HCK
UniProtKB:Q00341	HDLBP
UniProtKB:Q14CZ8	HEPACAM
UniProtKB:Q14469	HES1
UniProtKB:Q5TA89	HES5
UniProtKB:Q30201	HFE
UniProtKB:Q9UM44	HHLA2
UniProtKB:P04439	HLA-A
UniProtKB:P28068	HLA-DMB
UniProtKB:P20036	HLA-DPA1
UniProtKB:P04440	HLA-DPB1
UniProtKB:P01911	HLA-DRB1
UniProtKB:P13747	HLA-E
UniProtKB:P17693	HLA-G
UniProtKB:Q14774	HLX
UniProtKB:Q96RW7	HMCN1
UniProtKB:P17096	HMGA1
UniProtKB:P09429	HMGB1
UniProtKB:P61978	HNRNPK
UniProtKB:P31268	HOXA7
UniProtKB:P31249	HOXD3
UniProtKB:Q9Y251	HPSE
UniProtKB:P04196	HRG
UniProtKB:Q53GQ0	HSD17B12
UniProtKB:P08238	HSP90AB1
UniProtKB:P14625	HSP90B1
UniProtKB:P0DMV8	HSPA1A
UniProtKB:P0DMV9	HSPA1B
UniProtKB:P11021	HSPA5
UniProtKB:P11142	HSPA8
UniProtKB:P38646	HSPA9
UniProtKB:P04792	HSPB1
UniProtKB:P10809	HSPD1
UniProtKB:P98160	HSPG2
UniProtKB:Q92598	HSPH1
UniProtKB:Q12794	HYAL1
UniProtKB:Q9Y4L1	HYOU1
UniProtKB:P21815	IBSP
UniProtKB:P05362	ICAM1
UniProtKB:P13598	ICAM2
UniProtKB:P32942	ICAM3
UniProtKB:Q14773	ICAM4
UniProtKB:Q9UMF0	ICAM5
UniProtKB:Q9Y6W8	ICOS
UniProtKB:O75144	ICOSLG
UniProtKB:P41134	ID1
UniProtKB:O75874	IDH1
UniProtKB:P14902	IDO1
UniProtKB:P01563	IFNA2
UniProtKB:P01574	IFNB1
UniProtKB:P01579	IFNG
UniProtKB:Q8IU54	IFNL1
UniProtKB:Q96LB3	IFT74
UniProtKB:P05019	IGF1
UniProtKB:P01344	IGF2
UniProtKB:P11717	IGF2R
UniProtKB:P35858	IGFALS
UniProtKB:P18065	IGFBP2
UniProtKB:Q16270	IGFBP7
UniProtKB:Q5DX21	IGSF11
UniProtKB:Q96ID5	IGSF21
UniProtKB:Q9NSI5	IGSF5
UniProtKB:Q9P2J2	IGSF9
UniProtKB:Q9UPX0	IGSF9B
UniProtKB:Q14623	IHH
UniProtKB:P22301	IL10
UniProtKB:P29459	IL12A
UniProtKB:P29460	IL12B
UniProtKB:P42701	IL12RB1
UniProtKB:P40933	IL15
UniProtKB:Q14116	IL18
UniProtKB:P01584	IL1B
UniProtKB:Q9NPH3	IL1RAP
UniProtKB:Q9NZN1	IL1RAPL1
UniProtKB:Q01638	IL1RL1
UniProtKB:Q9HB29	IL1RL2
UniProtKB:P18510	IL1RN
UniProtKB:P60568	IL2
UniProtKB:Q6UXL0	IL20RB
UniProtKB:Q9HBE4	IL21
UniProtKB:Q9NPF7	IL23A
UniProtKB:Q5VWK5	IL23R
UniProtKB:P01589	IL2RA
UniProtKB:P24001	IL32
UniProtKB:Q9NZH7	IL36B
UniProtKB:P05112	IL4
UniProtKB:P24394	IL4R
UniProtKB:P05231	IL6
UniProtKB:P40189	IL6ST
UniProtKB:P13232	IL7
UniProtKB:P16871	IL7R
UniProtKB:Q13418	ILK
UniProtKB:P09529	INHBB
UniProtKB:O15357	INPPL1
UniProtKB:P46940	IQGAP1
UniProtKB:Q6DN90	IQSEC1
UniProtKB:P51617	IRAK1
UniProtKB:P10914	IRF1
UniProtKB:P14316	IRF2
UniProtKB:P05161	ISG15
UniProtKB:O14498	ISLR
UniProtKB:P53990	IST1
UniProtKB:P56199	ITGA1
UniProtKB:O75578	ITGA10
UniProtKB:Q9UKX5	ITGA11
UniProtKB:P17301	ITGA2
UniProtKB:P08514	ITGA2B
UniProtKB:P26006	ITGA3
UniProtKB:P13612	ITGA4
UniProtKB:P08648	ITGA5
UniProtKB:P23229	ITGA6
UniProtKB:Q13683	ITGA7
UniProtKB:P53708	ITGA8
UniProtKB:Q13797	ITGA9
UniProtKB:Q13349	ITGAD
UniProtKB:P38570	ITGAE
UniProtKB:P20701	ITGAL
UniProtKB:P11215	ITGAM
UniProtKB:P06756	ITGAV
UniProtKB:P20702	ITGAX
UniProtKB:P05556	ITGB1
UniProtKB:O14713	ITGB1BP1
UniProtKB:Q9UKP3	ITGB1BP2
UniProtKB:P05107	ITGB2
UniProtKB:P05106	ITGB3
UniProtKB:Q13352	ITGB3BP
UniProtKB:P16144	ITGB4
UniProtKB:P18084	ITGB5
UniProtKB:P18564	ITGB6
UniProtKB:P26010	ITGB7
UniProtKB:P26012	ITGB8
UniProtKB:O95965	ITGBL1
UniProtKB:P27987	ITPKB
UniProtKB:Q8IYV9	IZUMO1
UniProtKB:A6ND01	IZUMO1R
UniProtKB:P78504	JAG1
UniProtKB:Q9Y219	JAG2
UniProtKB:P23458	JAK1
UniProtKB:O60674	JAK2
UniProtKB:P52333	JAK3
UniProtKB:P57087	JAM2
UniProtKB:Q9BX67	JAM3
UniProtKB:Q86YT9	JAML
UniProtKB:Q9P266	JCAD
UniProtKB:P14923	JUP
UniProtKB:Q14678	KANK1
UniProtKB:P35968	KDR
UniProtKB:Q15058	KIF14
UniProtKB:Q02241	KIF23
UniProtKB:Q2KJY2	KIF26B
UniProtKB:P33176	KIF5B
UniProtKB:Q92845	KIFAP3
UniProtKB:Q9BVG8	KIFC3
UniProtKB:Q96J84	KIRREL1
UniProtKB:Q6UWL6	KIRREL2
UniProtKB:Q8IZU9	KIRREL3
UniProtKB:P10721	KIT
UniProtKB:P21583	KITLG
UniProtKB:Q9H0B6	KLC2
UniProtKB:O14901	KLF11
UniProtKB:O43474	KLF4
UniProtKB:P26718	KLRK1
UniProtKB:P01042	KNG1
UniProtKB:P01116	KRAS
UniProtKB:P05783	KRT18
UniProtKB:Q86UP2	KTN1
UniProtKB:P32004	L1CAM
UniProtKB:O00515	LAD1
UniProtKB:P18627	LAG3
UniProtKB:P25391	LAMA1
UniProtKB:P24043	LAMA2
UniProtKB:Q16787	LAMA3
UniProtKB:Q16363	LAMA4
UniProtKB:O15230	LAMA5
UniProtKB:P07942	LAMB1
UniProtKB:P55268	LAMB2
UniProtKB:Q13751	LAMB3
UniProtKB:A4D0S4	LAMB4
UniProtKB:P11047	LAMC1
UniProtKB:Q13753	LAMC2
UniProtKB:Q9Y6N6	LAMC3
UniProtKB:Q9UHA4	LAMTOR3
UniProtKB:P28838	LAP3
UniProtKB:Q6PKG0	LARP1
UniProtKB:Q14847	LASP1
UniProtKB:Q8IWV1	LAX1
UniProtKB:Q6UX15	LAYN
UniProtKB:P06239	LCK
UniProtKB:P13796	LCP1
UniProtKB:Q86U70	LDB1
UniProtKB:P00338	LDHA
UniProtKB:Q9UJU2	LEF1
UniProtKB:P41159	LEP
UniProtKB:P09382	LGALS1
UniProtKB:P17931	LGALS3
UniProtKB:Q08380	LGALS3BP
UniProtKB:P56470	LGALS4
UniProtKB:P47929	LGALS7
UniProtKB:O00214	LGALS8
UniProtKB:O00182	LGALS9
UniProtKB:Q3B8N2	LGALS9B
UniProtKB:Q6DKI2	LGALS9C
UniProtKB:P15018	LIF
UniProtKB:Q8NHL6	LILRB1
UniProtKB:Q8N423	LILRB2
UniProtKB:Q8NHJ6	LILRB4
UniProtKB:Q9UHB6	LIMA1
UniProtKB:Q9UPQ0	LIMCH1
UniProtKB:Q9UGP4	LIMD1
UniProtKB:P53667	LIMK1
UniProtKB:P48059	LIMS1
UniProtKB:Q7Z4I7	LIMS2
UniProtKB:Q96KR4	LMLN
UniProtKB:A0A1B0GTW7	LMLN2
UniProtKB:Q8WWI1	LMO7
UniProtKB:A0A087X1L8	LOC102723996
UniProtKB:Q9Y4K0	LOXL2
UniProtKB:P58215	LOXL3
UniProtKB:Q93052	LPP
UniProtKB:O60711	LPXN
UniProtKB:Q9BTN0	LRFN3
UniProtKB:Q6PJG9	LRFN4
UniProtKB:Q96NI6	LRFN5
UniProtKB:Q07954	LRP1
UniProtKB:O75581	LRP6
UniProtKB:Q9BTT6	LRRC1
UniProtKB:Q8TF66	LRRC15
UniProtKB:Q14392	LRRC32
UniProtKB:Q9HBW1	LRRC4
UniProtKB:Q9NT99	LRRC4B
UniProtKB:Q9HCJ2	LRRC4C
UniProtKB:Q96AG4	LRRC59
UniProtKB:Q96NW7	LRRC7
UniProtKB:Q32MZ4	LRRFIP1
UniProtKB:O75325	LRRN2
UniProtKB:Q13449	LSAMP
UniProtKB:Q8N2S1	LTBP4
UniProtKB:P02788	LTF
UniProtKB:Q14210	LY6D
UniProtKB:Q9HBG7	LY9
UniProtKB:P07948	LYN
UniProtKB:O95274	LYPD3
UniProtKB:Q6UWN5	LYPD5
UniProtKB:O95372	LYPLA2
UniProtKB:Q9Y5Y7	LYVE1
UniProtKB:Q9UPN3	MACF1
UniProtKB:Q9Y6D9	MAD1L1
UniProtKB:Q9UI95	MAD2L2
UniProtKB:Q13477	MADCAM1
UniProtKB:Q7L5Y9	MAEA
UniProtKB:P20916	MAG
UniProtKB:Q96QZ7	MAGI1
UniProtKB:Q9UDY8	MALT1
UniProtKB:Q02750	MAP2K1
UniProtKB:P36507	MAP2K2
UniProtKB:Q13163	MAP2K5
UniProtKB:P41279	MAP3K8
UniProtKB:O95819	MAP4K4
UniProtKB:P28482	MAPK1
UniProtKB:Q16539	MAPK14
UniProtKB:P27361	MAPK3
UniProtKB:Q13164	MAPK7
UniProtKB:Q15691	MAPRE1
UniProtKB:Q15555	MAPRE2
UniProtKB:Q9H992	MARCHF7
UniProtKB:P29966	MARCKS
UniProtKB:Q7KZI7	MARK2
UniProtKB:Q8IYB1	MB21D2
UniProtKB:P02686	MBP
UniProtKB:P43121	MCAM
UniProtKB:Q14676	MDC1
UniProtKB:Q8NFP4	MDGA1
UniProtKB:P21741	MDK
UniProtKB:Q96KG7	MEGF10
UniProtKB:A6BM72	MEGF11
UniProtKB:Q9H1U4	MEGF9
UniProtKB:P08582	MELTF
UniProtKB:O00255	MEN1
UniProtKB:Q12866	MERTK
UniProtKB:P53582	METAP1
UniProtKB:Q86U44	METTL3
UniProtKB:P55083	MFAP4
UniProtKB:Q08431	MFGE8
UniProtKB:Q5JRA6	MIA3
UniProtKB:Q8N3F8	MICALL1
UniProtKB:Q8IY33	MICALL2
UniProtKB:Q8N4C8	MINK1
UniProtKB:P30301	MIP
UniProtKB:Q8IVT2	MISP
UniProtKB:Q9UL63	MKLN1
UniProtKB:P08473	MME
UniProtKB:P39900	MMP12
UniProtKB:P50281	MMP14
UniProtKB:Q9Y5R2	MMP24
UniProtKB:Q13201	MMRN1
UniProtKB:Q16653	MOG
UniProtKB:O75970	MPDZ
UniProtKB:P40238	MPL
UniProtKB:Q5T2T1	MPP7
UniProtKB:Q6WCQ1	MPRIP
UniProtKB:P25189	MPZ
UniProtKB:O95297	MPZL1
UniProtKB:O60487	MPZL2
UniProtKB:Q6UWV2	MPZL3
UniProtKB:Q9UBG0	MRC2
UniProtKB:P49959	MRE11
UniProtKB:Q9ULH7	MRTFB
UniProtKB:Q13421	MSLN
UniProtKB:Q96KJ4	MSLNL
UniProtKB:P26038	MSN
UniProtKB:Q9Y483	MTF2
UniProtKB:O43312	MTSS1
UniProtKB:P15941	MUC1
UniProtKB:Q8WXI7	MUC16
UniProtKB:A0A0G2JKD1	MUC21
UniProtKB:A0A140T8X8	MUC21
UniProtKB:Q5SSG8	MUC21
UniProtKB:Q99102	MUC4
UniProtKB:Q9BRK3	MXRA8
UniProtKB:Q96S97	MYADM
UniProtKB:P10242	MYB
UniProtKB:Q00872	MYBPC1
UniProtKB:Q14324	MYBPC2
UniProtKB:Q14896	MYBPC3
UniProtKB:Q13203	MYBPH
UniProtKB:P13349	MYF5
UniProtKB:P35580	MYH10
UniProtKB:P35579	MYH9
UniProtKB:P19105	MYL12A
UniProtKB:P24844	MYL9
UniProtKB:Q9HD67	MYO10
UniProtKB:O43795	MYO1B
UniProtKB:B0I1T2	MYO1G
UniProtKB:Q99972	MYOC
UniProtKB:Q9UBF9	MYOT
UniProtKB:Q86TC9	MYPN
UniProtKB:P13591	NCAM1
UniProtKB:O15394	NCAM2
UniProtKB:O14594	NCAN
UniProtKB:P16333	NCK1
UniProtKB:O43639	NCK2
UniProtKB:Q9Y2A7	NCKAP1
UniProtKB:P55160	NCKAP1L
UniProtKB:Q92542	NCSTN
UniProtKB:Q9BT67	NDFIP1
UniProtKB:Q8TB73	NDNF
UniProtKB:Q92597	NDRG1
UniProtKB:Q15223	NECTIN1
UniProtKB:Q92692	NECTIN2
UniProtKB:Q9NQS3	NECTIN3
UniProtKB:Q96NY8	NECTIN4
UniProtKB:Q14511	NEDD9
UniProtKB:Q7Z3B1	NEGR1
UniProtKB:Q92859	NEO1
UniProtKB:Q5QGS0	NEXMIF
UniProtKB:Q0ZGT2	NEXN
UniProtKB:P21359	NF1
UniProtKB:P35240	NF2
UniProtKB:O94856	NFASC
UniProtKB:O94916	NFAT5
UniProtKB:Q8NI38	NFKBID
UniProtKB:Q9BYH8	NFKBIZ
UniProtKB:Q6T4R5	NHS
UniProtKB:Q96TA1	NIBAN2
UniProtKB:P14543	NID1
UniProtKB:Q14112	NID2
UniProtKB:Q92982	NINJ1
UniProtKB:Q9NZG7	NINJ2
UniProtKB:Q9Y2I1	NISCH
UniProtKB:Q8N5F7	NKAP
UniProtKB:Q8N2Q7	NLGN1
UniProtKB:Q8NFZ4	NLGN2
UniProtKB:Q9NZ94	NLGN3
UniProtKB:Q8N0W4	NLGN4X
UniProtKB:Q8NFZ3	NLGN4Y
UniProtKB:Q96P20	NLRP3
UniProtKB:P22392	NME2
UniProtKB:Q9HC29	NOD2
UniProtKB:Q96S42	NODAL
UniProtKB:O00567	NOP56
UniProtKB:P46531	NOTCH1
UniProtKB:Q9UM47	NOTCH3
UniProtKB:Q99466	NOTCH4
UniProtKB:Q9NPH5	NOX4
UniProtKB:O15259	NPHP1
UniProtKB:O75161	NPHP4
UniProtKB:O60500	NPHS1
UniProtKB:P06748	NPM1
UniProtKB:Q6UXI9	NPNT
UniProtKB:Q9Y639	NPTN
UniProtKB:P49146	NPY2R
UniProtKB:Q92570	NR4A3
UniProtKB:Q7Z6K4	NRARP
UniProtKB:Q92823	NRCAM
UniProtKB:Q02297	NRG1
UniProtKB:O14786	NRP1
UniProtKB:O60462	NRP2
UniProtKB:Q9ULB1	NRXN1
UniProtKB:Q9P2S2	NRXN2
UniProtKB:Q9Y4C0	NRXN3
UniProtKB:P21589	NT5E
UniProtKB:Q9P121	NTM
UniProtKB:O95631	NTN1
UniProtKB:Q9HB63	NTN4
UniProtKB:Q9Y2I2	NTNG1
UniProtKB:Q96CW9	NTNG2
UniProtKB:O60285	NUAK1
UniProtKB:Q9Y266	NUDC
UniProtKB:P49757	NUMB
UniProtKB:Q9Y6R0	NUMBL
UniProtKB:Q9NTK5	OLA1
UniProtKB:Q6UX06	OLFM4
UniProtKB:P78380	OLR1
UniProtKB:Q99983	OMD
UniProtKB:P23515	OMG
UniProtKB:Q9UBC0	ONECUT1
UniProtKB:O95948	ONECUT2
UniProtKB:Q14982	OPCML
UniProtKB:P35372	OPRM1
UniProtKB:Q7RTW8	OTOA
UniProtKB:Q99571	P2RX4
UniProtKB:Q9H244	P2RY12
UniProtKB:P07237	P4HB
UniProtKB:P11940	PABPC1
UniProtKB:Q9UNF0	PACSIN2
UniProtKB:Q9NWQ8	PAG1
UniProtKB:P22234	PAICS
UniProtKB:Q13153	PAK1
UniProtKB:Q13177	PAK2
UniProtKB:O75914	PAK3
UniProtKB:O96013	PAK4
UniProtKB:Q9NQU5	PAK6
UniProtKB:Q8WX93	PALLD
UniProtKB:Q8TEW0	PARD3
UniProtKB:Q8TEW8	PARD3B
UniProtKB:Q99497	PARK7
UniProtKB:Q9NVD7	PARVA
UniProtKB:Q9HBI1	PARVB
UniProtKB:Q9HBI0	PARVG
UniProtKB:Q96IZ0	PAWR
UniProtKB:Q15365	PCBP1
UniProtKB:Q15366	PCBP2
UniProtKB:Q08174	PCDH1
UniProtKB:Q9P2E7	PCDH10
UniProtKB:Q9BZA7	PCDH11X
UniProtKB:Q9BZA8	PCDH11Y
UniProtKB:Q9NPG4	PCDH12
UniProtKB:Q96QU1	PCDH15
UniProtKB:O14917	PCDH17
UniProtKB:Q9HCL0	PCDH18
UniProtKB:Q8TAB3	PCDH19
UniProtKB:Q8N6Y1	PCDH20
UniProtKB:O60245	PCDH7
UniProtKB:O95206	PCDH8
UniProtKB:Q9HC56	PCDH9
UniProtKB:Q9Y5I3	PCDHA1
UniProtKB:Q9Y5I2	PCDHA10
UniProtKB:Q9Y5I1	PCDHA11
UniProtKB:Q9UN75	PCDHA12
UniProtKB:Q9Y5I0	PCDHA13
UniProtKB:Q9Y5H9	PCDHA2
UniProtKB:Q9Y5H8	PCDHA3
UniProtKB:Q9UN74	PCDHA4
UniProtKB:Q9Y5H7	PCDHA5
UniProtKB:Q9UN73	PCDHA6
UniProtKB:Q9UN72	PCDHA7
UniProtKB:Q9Y5H6	PCDHA8
UniProtKB:Q9Y5H5	PCDHA9
UniProtKB:Q9H158	PCDHAC1
UniProtKB:Q9Y5I4	PCDHAC2
UniProtKB:Q9Y5F3	PCDHB1
UniProtKB:Q9UN67	PCDHB10
UniProtKB:Q9Y5F2	PCDHB11
UniProtKB:Q9Y5F1	PCDHB12
UniProtKB:Q9Y5F0	PCDHB13
UniProtKB:Q9Y5E9	PCDHB14
UniProtKB:Q9Y5E8	PCDHB15
UniProtKB:Q9NRJ7	PCDHB16
UniProtKB:Q96TA0	PCDHB18P
UniProtKB:Q9Y5E7	PCDHB2
UniProtKB:Q9Y5E6	PCDHB3
UniProtKB:Q9Y5E5	PCDHB4
UniProtKB:Q9Y5E4	PCDHB5
UniProtKB:Q9Y5E3	PCDHB6
UniProtKB:Q9Y5E2	PCDHB7
UniProtKB:Q9UN66	PCDHB8
UniProtKB:Q9Y5E1	PCDHB9
UniProtKB:Q9Y5H4	PCDHGA1
UniProtKB:Q9Y5H3	PCDHGA10
UniProtKB:Q9Y5H2	PCDHGA11
UniProtKB:O60330	PCDHGA12
UniProtKB:Q9Y5H1	PCDHGA2
UniProtKB:Q9Y5H0	PCDHGA3
UniProtKB:Q9Y5G9	PCDHGA4
UniProtKB:Q9Y5G8	PCDHGA5
UniProtKB:Q9Y5G7	PCDHGA6
UniProtKB:Q9Y5G6	PCDHGA7
UniProtKB:Q9Y5G5	PCDHGA8
UniProtKB:Q9Y5G4	PCDHGA9
UniProtKB:Q9Y5G3	PCDHGB1
UniProtKB:Q9Y5G2	PCDHGB2
UniProtKB:Q9Y5G1	PCDHGB3
UniProtKB:Q9UN71	PCDHGB4
UniProtKB:Q9Y5G0	PCDHGB5
UniProtKB:Q9Y5F9	PCDHGB6
UniProtKB:Q9Y5F8	PCDHGB7
UniProtKB:Q9UN70	PCDHGC3
UniProtKB:Q9Y5F7	PCDHGC4
UniProtKB:Q9Y5F6	PCDHGC5
UniProtKB:P22061	PCMT1
UniProtKB:Q15116	PDCD1
UniProtKB:Q9BQ51	PDCD1LG2
UniProtKB:Q8WUM4	PDCD6IP
UniProtKB:Q13370	PDE3B
UniProtKB:O76074	PDE5A
UniProtKB:P16234	PDGFRA
UniProtKB:P09619	PDGFRB
UniProtKB:P30101	PDIA3
UniProtKB:O00151	PDLIM1
UniProtKB:Q96HC4	PDLIM5
UniProtKB:Q9NR12	PDLIM7
UniProtKB:O15530	PDPK1
UniProtKB:Q86YL7	PDPN
UniProtKB:Q6P996	PDXDC1
UniProtKB:O15018	PDZD2
UniProtKB:Q9H792	PEAK1
UniProtKB:Q6ZS72	PEAK3
UniProtKB:Q5VY43	PEAR1
UniProtKB:P16284	PECAM1
UniProtKB:Q96FA3	PELI1
UniProtKB:Q96FX8	PERP
UniProtKB:Q01813	PFKP
UniProtKB:P07737	PFN1
UniProtKB:Q15124	PGM5
UniProtKB:Q86SQ0	PHLDB2
UniProtKB:P42356	PI4KA
UniProtKB:Q13492	PICALM
UniProtKB:Q92508	PIEZO1
UniProtKB:P42336	PIK3CA
UniProtKB:P42338	PIK3CB
UniProtKB:P48736	PIK3CG
UniProtKB:P27986	PIK3R1
UniProtKB:Q5UE93	PIK3R6
UniProtKB:Q99755	PIP5K1A
UniProtKB:O60331	PIP5K1C
UniProtKB:P98161	PKD1
UniProtKB:Q8TDX9	PKD1L1
UniProtKB:P08F94	PKHD1
UniProtKB:P14618	PKM
UniProtKB:Q16513	PKN2
UniProtKB:Q13835	PKP1
UniProtKB:Q99959	PKP2
UniProtKB:Q9Y446	PKP3
UniProtKB:Q99569	PKP4
UniProtKB:P14555	PLA2G2A
UniProtKB:Q9UNK4	PLA2G2D
UniProtKB:Q9NZK7	PLA2G2E
UniProtKB:Q9BZM2	PLA2G2F
UniProtKB:P00749	PLAU
UniProtKB:Q03405	PLAUR
UniProtKB:Q01970	PLCB3
UniProtKB:Q15149	PLEC
UniProtKB:P08567	PLEK
UniProtKB:Q9HB19	PLEKHA2
UniProtKB:Q6IQ23	PLEKHA7
UniProtKB:Q6UQ28	PLET1
UniProtKB:P00747	PLG
UniProtKB:O60664	PLIN3
UniProtKB:O14495	PLPP3
UniProtKB:Q9UIW2	PLXNA1
UniProtKB:O75051	PLXNA2
UniProtKB:P51805	PLXNA3
UniProtKB:Q9HCM2	PLXNA4
UniProtKB:O43157	PLXNB1
UniProtKB:O15031	PLXNB2
UniProtKB:Q9ULL4	PLXNB3
UniProtKB:O60486	PLXNC1
UniProtKB:Q9Y4D7	PLXND1
UniProtKB:P29590	PML
UniProtKB:Q9H307	PNN
UniProtKB:P00491	PNP
UniProtKB:O00592	PODXL
UniProtKB:Q9NZ53	PODXL2
UniProtKB:Q15063	POSTN
UniProtKB:Q07869	PPARA
UniProtKB:Q03181	PPARD
UniProtKB:Q13136	PPFIA1
UniProtKB:O75334	PPFIA2
UniProtKB:Q86W92	PPFIBP1
UniProtKB:P62937	PPIA
UniProtKB:P23284	PPIB
UniProtKB:O60437	PPL
UniProtKB:P49593	PPM1F
UniProtKB:Q9Y570	PPME1
UniProtKB:P62136	PPP1CA
UniProtKB:P62140	PPP1CB
UniProtKB:P36873	PPP1CC
UniProtKB:O14974	PPP1R12A
UniProtKB:Q8WUF5	PPP1R13L
UniProtKB:P67775	PPP2CA
UniProtKB:P30153	PPP2R1A
UniProtKB:Q08209	PPP3CA
UniProtKB:Q86YV5	PRAG1
UniProtKB:Q06830	PRDX1
UniProtKB:P32119	PRDX2
UniProtKB:P30041	PRDX6
UniProtKB:Q8TCU6	PREX1
UniProtKB:P10644	PRKAR1A
UniProtKB:P13861	PRKAR2A
UniProtKB:P17252	PRKCA
UniProtKB:Q05655	PRKCD
UniProtKB:Q02156	PRKCE
UniProtKB:Q04759	PRKCQ
UniProtKB:Q05513	PRKCZ
UniProtKB:Q9BZL6	PRKD2
UniProtKB:Q13976	PRKG1
UniProtKB:P51817	PRKX
UniProtKB:P16471	PRLR
UniProtKB:P04156	PRNP
UniProtKB:Q9UNN8	PROCR
UniProtKB:O43490	PROM1
UniProtKB:P23942	PRPH2
UniProtKB:P07478	PRSS2
UniProtKB:Q86TP1	PRUNE1
UniProtKB:P49768	PSEN1
UniProtKB:P28072	PSMB6
UniProtKB:O43586	PSTPIP1
UniProtKB:P25105	PTAFR
UniProtKB:P60484	PTEN
UniProtKB:Q05397	PTK2
UniProtKB:Q14289	PTK2B
UniProtKB:Q13308	PTK7
UniProtKB:P21246	PTN
UniProtKB:P18031	PTPN1
UniProtKB:Q06124	PTPN11
UniProtKB:Q05209	PTPN12
UniProtKB:P17706	PTPN2
UniProtKB:Q9Y2R2	PTPN22
UniProtKB:Q9H3S7	PTPN23
UniProtKB:P29350	PTPN6
UniProtKB:P18433	PTPRA
UniProtKB:P23467	PTPRB
UniProtKB:P08575	PTPRC
UniProtKB:P23468	PTPRD
UniProtKB:P10586	PTPRF
UniProtKB:Q9HD43	PTPRH
UniProtKB:Q12913	PTPRJ
UniProtKB:Q15262	PTPRK
UniProtKB:P28827	PTPRM
UniProtKB:Q16827	PTPRO
UniProtKB:Q13332	PTPRS
UniProtKB:O14522	PTPRT
UniProtKB:Q92729	PTPRU
UniProtKB:P23471	PTPRZ1
UniProtKB:Q9UHX1	PUF60
UniProtKB:P15151	PVR
UniProtKB:P49023	PXN
UniProtKB:Q9ULZ3	PYCARD
UniProtKB:P61026	RAB10
UniProtKB:Q15907	RAB11B
UniProtKB:P62820	RAB1A
UniProtKB:Q9UL25	RAB21
UniProtKB:P63000	RAC1
UniProtKB:P15153	RAC2
UniProtKB:P60763	RAC3
UniProtKB:P63244	RACK1
UniProtKB:Q96JH8	RADIL
UniProtKB:P15918	RAG1
UniProtKB:P11233	RALA
UniProtKB:P62826	RAN
UniProtKB:P43487	RANBP1
UniProtKB:P46060	RANGAP1
UniProtKB:P61225	RAP2B
UniProtKB:Q13905	RAPGEF1
UniProtKB:P10276	RARA
UniProtKB:P54136	RARS1
UniProtKB:P20936	RASA1
UniProtKB:Q86YV0	RASAL3
UniProtKB:O95267	RASGRP1
UniProtKB:Q5TC82	RC3H1
UniProtKB:Q9HBD1	RC3H2
UniProtKB:Q9P258	RCC2
UniProtKB:P35241	RDX
UniProtKB:Q06141	REG3A
UniProtKB:Q04206	RELA
UniProtKB:Q8NC24	RELL2
UniProtKB:P78509	RELN
UniProtKB:P07949	RET
UniProtKB:Q9Y3B8	REXO2
UniProtKB:Q9H4X1	RGCC
UniProtKB:Q6NW40	RGMB
UniProtKB:P61586	RHOA
UniProtKB:P62745	RHOB
UniProtKB:O00212	RHOD
UniProtKB:P84095	RHOG
UniProtKB:Q15669	RHOH
UniProtKB:Q7L0Q8	RHOU
UniProtKB:Q9NPQ8	RIC8A
UniProtKB:Q8WYP3	RIN2
UniProtKB:O43353	RIPK2
UniProtKB:Q9Y4F9	RIPOR2
UniProtKB:Q5GAN6	RNASE10
UniProtKB:Q92730	RND1
UniProtKB:P61587	RND3
UniProtKB:Q9Y6N7	ROBO1
UniProtKB:Q9HCK4	ROBO2
UniProtKB:Q96MS0	ROBO3
UniProtKB:Q8WZ75	ROBO4
UniProtKB:Q13464	ROCK1
UniProtKB:O75116	ROCK2
UniProtKB:Q03395	ROM1
UniProtKB:Q9BZX4	ROPN1B
UniProtKB:P62906	RPL10A
UniProtKB:P30050	RPL12
UniProtKB:P40429	RPL13A
UniProtKB:P50914	RPL14
UniProtKB:P61313	RPL15
UniProtKB:Q07020	RPL18
UniProtKB:P84098	RPL19
UniProtKB:P35268	RPL22
UniProtKB:P62829	RPL23
UniProtKB:P62750	RPL23A
UniProtKB:P83731	RPL24
UniProtKB:P61353	RPL27
UniProtKB:P47914	RPL29
UniProtKB:P39023	RPL3
UniProtKB:P62888	RPL30
UniProtKB:P62899	RPL31
UniProtKB:P49207	RPL34
UniProtKB:P61513	RPL37A
UniProtKB:P63173	RPL38
UniProtKB:P36578	RPL4
UniProtKB:P46777	RPL5
UniProtKB:Q02878	RPL6
UniProtKB:P18124	RPL7
UniProtKB:P62424	RPL7A
UniProtKB:P62917	RPL8
UniProtKB:P32969	RPL9
UniProtKB:P05388	RPLP0
UniProtKB:P05386	RPLP1
UniProtKB:P05387	RPLP2
UniProtKB:P46783	RPS10
UniProtKB:P62280	RPS11
UniProtKB:P62277	RPS13
UniProtKB:P62263	RPS14
UniProtKB:P62841	RPS15
UniProtKB:P62249	RPS16
UniProtKB:P08708	RPS17
UniProtKB:P62269	RPS18
UniProtKB:P39019	RPS19
UniProtKB:P15880	RPS2
UniProtKB:P62854	RPS26
UniProtKB:P62273	RPS29
UniProtKB:P23396	RPS3
UniProtKB:P61247	RPS3A
UniProtKB:P62701	RPS4X
UniProtKB:P46782	RPS5
UniProtKB:P62081	RPS7
UniProtKB:P62241	RPS8
UniProtKB:P46781	RPS9
UniProtKB:P08865	RPSA
UniProtKB:P10301	RRAS
UniProtKB:P62070	RRAS2
UniProtKB:Q92766	RREB1
UniProtKB:O15537	RS1
UniProtKB:O76021	RSL1D1
UniProtKB:Q15404	RSU1
UniProtKB:Q9NQC3	RTN4
UniProtKB:Q01196	RUNX1
UniProtKB:Q13761	RUNX3
UniProtKB:Q9Y265	RUVBL1
UniProtKB:P60903	S100A10
UniProtKB:P31949	S100A11
UniProtKB:P31151	S100A7
UniProtKB:P05109	S100A8
UniProtKB:P06702	S100A9
UniProtKB:P25815	S100P
UniProtKB:P21453	S1PR1
UniProtKB:O95136	S1PR2
UniProtKB:Q99500	S1PR3
UniProtKB:P0DJI8	SAA1
UniProtKB:O43290	SART1
UniProtKB:O75995	SASH3
UniProtKB:Q8WTV0	SCARB1
UniProtKB:Q14108	SCARB2
UniProtKB:Q14162	SCARF1
UniProtKB:Q96GP6	SCARF2
UniProtKB:P11684	SCGB1A1
UniProtKB:Q07699	SCN1B
UniProtKB:Q14160	SCRIB
UniProtKB:Q96KG9	SCYL1
UniProtKB:P31431	SDC4
UniProtKB:O00560	SDCBP
UniProtKB:Q7Z5N4	SDK1
UniProtKB:Q58EX2	SDK2
UniProtKB:P16581	SELE
UniProtKB:Q9Y6D0	SELENOK
UniProtKB:P14151	SELL
UniProtKB:P16109	SELP
UniProtKB:Q14242	SELPLG
UniProtKB:O15041	SEMA3E
UniProtKB:Q92854	SEMA4D
UniProtKB:Q13591	SEMA5A
UniProtKB:Q9H2E6	SEMA6A
UniProtKB:O75326	SEMA7A
UniProtKB:Q9P0U3	SENP1
UniProtKB:Q15019	SEPTIN2
UniProtKB:Q16181	SEPTIN7
UniProtKB:Q9UHD8	SEPTIN9
UniProtKB:Q8NC51	SERBP1
UniProtKB:P50452	SERPINB8
UniProtKB:P05121	SERPINE1
UniProtKB:P07093	SERPINE2
UniProtKB:P08697	SERPINF2
UniProtKB:Q99574	SERPINI1
UniProtKB:P31947	SFN
UniProtKB:Q8N474	SFRP1
UniProtKB:Q96HF1	SFRP2
UniProtKB:P35247	SFTPD
UniProtKB:O43556	SGCE
UniProtKB:Q9UQQ2	SH2B3
UniProtKB:Q99961	SH3GL1
UniProtKB:Q9Y371	SH3GLB1
UniProtKB:Q9NR46	SH3GLB2
UniProtKB:Q96B97	SH3KBP1
UniProtKB:P29353	SHC1
UniProtKB:Q15465	SHH
UniProtKB:Q9ULL8	SHROOM4
UniProtKB:A0MZ66	SHTN1
UniProtKB:Q9BZZ2	SIGLEC1
UniProtKB:Q96LC7	SIGLEC10
UniProtKB:Q96RL6	SIGLEC11
UniProtKB:Q96PQ1	SIGLEC12
UniProtKB:Q08ET2	SIGLEC14
UniProtKB:A6NMB1	SIGLEC16
UniProtKB:O15389	SIGLEC5
UniProtKB:O43699	SIGLEC6
UniProtKB:Q9Y286	SIGLEC7
UniProtKB:Q9NYZ4	SIGLEC8
UniProtKB:Q9Y336	SIGLEC9
UniProtKB:Q8N7X8	SIGLECL1
UniProtKB:Q96FS4	SIPA1
UniProtKB:P78324	SIRPA
UniProtKB:O00241	SIRPB1
UniProtKB:Q9P1W8	SIRPG
UniProtKB:Q86WV1	SKAP1
UniProtKB:Q13309	SKP2
UniProtKB:Q13291	SLAMF1
UniProtKB:Q9NQ25	SLAMF7
UniProtKB:Q15849	SLC14A2
UniProtKB:Q9C0K1	SLC39A8
UniProtKB:P08195	SLC3A2
UniProtKB:P04920	SLC4A2
UniProtKB:P31645	SLC6A4
UniProtKB:Q9UPY5	SLC7A11
UniProtKB:P19634	SLC9A1
UniProtKB:Q15599	SLC9A3R2
UniProtKB:Q96PX8	SLITRK1
UniProtKB:Q9H156	SLITRK2
UniProtKB:O94933	SLITRK3
UniProtKB:Q9H2G2	SLK
UniProtKB:P55000	SLURP1
UniProtKB:P84022	SMAD3
UniProtKB:O43541	SMAD6
UniProtKB:O15105	SMAD7
UniProtKB:Q0VAQ4	SMAGP
UniProtKB:Q9H3U7	SMOC2
UniProtKB:O43623	SNAI2
UniProtKB:O00161	SNAP23
UniProtKB:Q7KZF4	SND1
UniProtKB:Q8TER0	SNED1
UniProtKB:Q13884	SNTB1
UniProtKB:Q13425	SNTB2
UniProtKB:Q13596	SNX1
UniProtKB:O60749	SNX2
UniProtKB:Q9Y5X3	SNX5
UniProtKB:Q9Y5X1	SNX9
UniProtKB:O15524	SOCS1
UniProtKB:O75159	SOCS5
UniProtKB:O14544	SOCS6
UniProtKB:Q9BX66	SORBS1
UniProtKB:O94875	SORBS2
UniProtKB:O60504	SORBS3
UniProtKB:O15370	SOX12
UniProtKB:Q9UN79	SOX13
UniProtKB:P48431	SOX2
UniProtKB:Q06945	SOX4
UniProtKB:P48436	SOX9
UniProtKB:Q8TDM5	SPACA4
UniProtKB:P38567	SPAM1
UniProtKB:Q14515	SPARCL1
UniProtKB:Q69YQ0	SPECC1L
UniProtKB:Q9NQ38	SPINK5
UniProtKB:O43291	SPINT2
UniProtKB:P16150	SPN
UniProtKB:Q08629	SPOCK1
UniProtKB:Q92563	SPOCK2
UniProtKB:Q9HCB6	SPON1
UniProtKB:Q9BUD6	SPON2
UniProtKB:P10451	SPP1
UniProtKB:Q9C004	SPRY4
UniProtKB:P02549	SPTA1
UniProtKB:Q13813	SPTAN1
UniProtKB:Q01082	SPTBN1
UniProtKB:O15020	SPTBN2
UniProtKB:P12931	SRC
UniProtKB:Q9C0H9	SRCIN1
UniProtKB:P11831	SRF
UniProtKB:O75044	SRGAP2
UniProtKB:Q9UHB9	SRP68
UniProtKB:P78539	SRPX
UniProtKB:O60687	SRPX2
UniProtKB:Q14714	SSPN
UniProtKB:A2VEC9	SSPO
UniProtKB:Q9Y2D8	SSX2IP
UniProtKB:Q9NY15	STAB1
UniProtKB:Q8WWQ8	STAB2
UniProtKB:Q92502	STARD8
UniProtKB:P42224	STAT1
UniProtKB:P51692	STAT5B
UniProtKB:O94804	STK10
UniProtKB:Q9Y6E0	STK24
UniProtKB:Q15208	STK38
UniProtKB:Q13043	STK4
UniProtKB:Q7RTU9	STRC
UniProtKB:A6NGW2	STRCP1
UniProtKB:O14662	STX16
UniProtKB:Q13277	STX3
UniProtKB:Q12846	STX4
UniProtKB:Q13190	STX5
UniProtKB:P61764	STXBP1
UniProtKB:O00186	STXBP3
UniProtKB:Q8NFX7	STXBP6
UniProtKB:O60279	SUSD5
UniProtKB:Q4LDE5	SVEP1
UniProtKB:O95425	SVIL
UniProtKB:Q9UH65	SWAP70
UniProtKB:P43405	SYK
UniProtKB:Q92797	SYMPK
UniProtKB:Q8WXH0	SYNE2
UniProtKB:P57105	SYNJ2BP
UniProtKB:A0A087WUM0	SYNJ2BP-COX16
UniProtKB:Q9UMS6	SYNPO2
UniProtKB:P09758	TACSTD2
UniProtKB:Q96BN2	TADA1
UniProtKB:P37802	TAGLN2
UniProtKB:Q9UL54	TAOK2
UniProtKB:B6A8C7	TARM1
UniProtKB:Q9BXI6	TBC1D10A
UniProtKB:Q9BYX2	TBC1D2
UniProtKB:Q9BTW9	TBCD
UniProtKB:Q9UL17	TBX21
UniProtKB:O75443	TECTA
UniProtKB:Q02763	TEK
UniProtKB:Q9UKZ4	TENM1
UniProtKB:Q9NT68	TENM2
UniProtKB:Q9P273	TENM3
UniProtKB:Q6N022	TENM4
UniProtKB:Q9UGI8	TES
UniProtKB:Q96BS2	TESC
UniProtKB:Q96S53	TESK2
UniProtKB:A2RU30	TESPA1
UniProtKB:P19532	TFE3
UniProtKB:P02786	TFRC
UniProtKB:P01137	TGFB1
UniProtKB:O43294	TGFB1I1
UniProtKB:P61812	TGFB2
UniProtKB:Q15582	TGFBI
UniProtKB:P37173	TGFBR2
UniProtKB:P21980	TGM2
UniProtKB:P07996	THBS1
UniProtKB:P35442	THBS2
UniProtKB:P49746	THBS3
UniProtKB:P35443	THBS4
UniProtKB:Q5TEJ8	THEMIS2
UniProtKB:P04216	THY1
UniProtKB:Q13009	TIAM1
UniProtKB:Q495A1	TIGIT
UniProtKB:Q9Y5J6	TIMM10B
UniProtKB:P16035	TIMP2
UniProtKB:Q9UJW2	TINAG
UniProtKB:Q07157	TJP1
UniProtKB:Q9UDY2	TJP2
UniProtKB:Q04725	TLE2
UniProtKB:Q9Y490	TLN1
UniProtKB:Q9Y4G6	TLN2
UniProtKB:Q53R12	TM4SF20
UniProtKB:Q92544	TM9SF4
UniProtKB:Q8N9M5	TMEM102
UniProtKB:A2VDJ0	TMEM131L
UniProtKB:A6NDV4	TMEM8B
UniProtKB:Q96BF3	TMIGD2
UniProtKB:Q9NYL9	TMOD3
UniProtKB:P42166	TMPO
UniProtKB:P24821	TNC
UniProtKB:P01375	TNF
UniProtKB:P98066	TNFAIP6
UniProtKB:Q6P589	TNFAIP8L2
UniProtKB:Q9NP84	TNFRSF12A
UniProtKB:Q96RJ3	TNFRSF13C
UniProtKB:Q92956	TNFRSF14
UniProtKB:Q9Y5U5	TNFRSF18
UniProtKB:O75509	TNFRSF21
UniProtKB:O14788	TNFSF11
UniProtKB:Q9Y275	TNFSF13B
UniProtKB:O43557	TNFSF14
UniProtKB:Q9UNG2	TNFSF18
UniProtKB:P23510	TNFSF4
UniProtKB:P41273	TNFSF9
UniProtKB:Q15025	TNIP1
UniProtKB:Q9C0C2	TNKS1BP1
UniProtKB:Q9UQP3	TNN
UniProtKB:Q92752	TNR
UniProtKB:Q9HBL0	TNS1
UniProtKB:Q63HR2	TNS2
UniProtKB:Q68CZ2	TNS3
UniProtKB:Q8IZW8	TNS4
UniProtKB:P22105	TNXB
UniProtKB:O14656	TOR1A
UniProtKB:Q13641	TPBG
UniProtKB:P09493	TPM1
UniProtKB:P67936	TPM4
UniProtKB:Q9Y4K3	TRAF6
UniProtKB:Q14258	TRIM25
UniProtKB:Q14134	TRIM29
UniProtKB:Q9H2D6	TRIOBP
UniProtKB:Q15654	TRIP6
UniProtKB:Q12816	TRO
UniProtKB:Q12815	TROAP
UniProtKB:Q9UBN4	TRPC4
UniProtKB:Q96QT4	TRPM7
UniProtKB:Q9HBA0	TRPV4
UniProtKB:Q92574	TSC1
UniProtKB:Q96QS1	TSPAN32
UniProtKB:O14817	TSPAN4
UniProtKB:P19075	TSPAN8
UniProtKB:O75954	TSPAN9
UniProtKB:Q13630	TSTA3
UniProtKB:Q9H313	TTYH1
UniProtKB:Q12792	TWF1
UniProtKB:Q6IBS0	TWF2
UniProtKB:Q9GZX9	TWSG1
UniProtKB:O14530	TXNDC9
UniProtKB:Q06418	TYRO3
UniProtKB:Q5T6F2	UBAP2
UniProtKB:Q8TF42	UBASH3B
UniProtKB:O14562	UBFD1
UniProtKB:O94941	UBOX5
UniProtKB:P07911	UMOD
UniProtKB:Q70J99	UNC13D
UniProtKB:Q9H3U1	UNC45A
UniProtKB:Q6UXZ4	UNC5D
UniProtKB:O60763	USO1
UniProtKB:Q8TEY7	USP33
UniProtKB:P40818	USP8
UniProtKB:P46939	UTRN
UniProtKB:Q15836	VAMP3
UniProtKB:Q9P0L0	VAPA
UniProtKB:O95292	VAPB
UniProtKB:Q6EMK4	VASN
UniProtKB:P50552	VASP
UniProtKB:P15498	VAV1
UniProtKB:Q9UKW4	VAV3
UniProtKB:P19320	VCAM1
UniProtKB:P13611	VCAN
UniProtKB:P18206	VCL
UniProtKB:P15692	VEGFA
UniProtKB:Q9HBM0	VEZT
UniProtKB:P08670	VIM
UniProtKB:Q6UXI7	VIT
UniProtKB:Q96GC9	VMP1
UniProtKB:O95497	VNN1
UniProtKB:Q9Y279	VSIG4
UniProtKB:Q9H7M9	VSIR
UniProtKB:Q96N03	VSTM2L
UniProtKB:Q7Z7D3	VTCN1
UniProtKB:P04004	VTN
UniProtKB:Q5GFL6	VWA2
UniProtKB:Q2TAL6	VWC2
UniProtKB:P04275	VWF
UniProtKB:Q92558	WASF1
UniProtKB:Q9Y6W5	WASF2
UniProtKB:Q9Y4E1	WASHC2C
UniProtKB:O95876	WDPCP
UniProtKB:Q8TF30	WHAMM
UniProtKB:Q9H4A3	WNK1
UniProtKB:P04628	WNT1
UniProtKB:P56704	WNT3A
UniProtKB:P56705	WNT4
UniProtKB:P41221	WNT5A
UniProtKB:P56706	WNT7B
UniProtKB:P17861	XBP1
UniProtKB:P47992	XCL1
UniProtKB:P46094	XCR1
UniProtKB:P55808	XG
UniProtKB:Q702N8	XIRP1
UniProtKB:A4UGR9	XIRP2
UniProtKB:P07947	YES1
UniProtKB:O15498	YKT6
UniProtKB:Q9Y5A9	YTHDF2
UniProtKB:P31946	YWHAB
UniProtKB:P62258	YWHAE
UniProtKB:P61981	YWHAG
UniProtKB:P27348	YWHAQ
UniProtKB:P63104	YWHAZ
UniProtKB:Q9Y493	ZAN
UniProtKB:P43403	ZAP70
UniProtKB:Q9Y2K1	ZBTB1
UniProtKB:Q05516	ZBTB16
UniProtKB:O15156	ZBTB7B
UniProtKB:Q5D1E8	ZC3H12A
UniProtKB:Q8WU90	ZC3H15
UniProtKB:Q8N5P1	ZC3H8
UniProtKB:Q7Z2W4	ZC3HAV1
UniProtKB:Q9UIJ5	ZDHHC2
UniProtKB:Q15911	ZFHX3
UniProtKB:Q07352	ZFP36L1
UniProtKB:Q9BQ24	ZFYVE21
UniProtKB:Q9ULJ6	ZMIZ1
UniProtKB:O15231	ZNF185
UniProtKB:Q9H7S9	ZNF703
UniProtKB:P21754	ZP3
UniProtKB:Q12836	ZP4
UniProtKB:Q15942	ZYX

## Sheet: Supplementary Table S6
Hierarchical Clusterization of PRAD-TCGA samples using the expression of Cell Adhesion genes (AMIGO2 GO)
ID	TCGA-HC-8262-11	TCGA-G9-6356-11	TCGA-EJ-A46H-01	TCGA-CH-5743-01	TCGA-G9-6365-11	TCGA-HC-7740-01	TCGA-G9-6370-01	TCGA-KK-A8IL-01	TCGA-EJ-7784-11	TCGA-CH-5767-11	TCGA-EJ-7314-11	TCGA-FC-A66V-01	TCGA-V1-A9ZG-01	TCGA-EJ-7330-01	TCGA-EJ-A8FO-11	TCGA-HI-7170-01	TCGA-XJ-A83H-01	TCGA-G9-6498-01	TCGA-G9-6339-01	TCGA-EJ-7794-11	TCGA-M7-A720-01	TCGA-KK-A7B2-01	TCGA-HC-A6HX-01	TCGA-G9-6496-11	TCGA-G9-6336-01	TCGA-G9-6333-11	TCGA-VN-A88Q-01	TCGA-EJ-5506-01	TCGA-EJ-7782-11	TCGA-J9-A52E-01	TCGA-HC-8258-01	TCGA-EJ-7783-01	TCGA-G9-7510-01	TCGA-G9-6342-11	TCGA-HC-7737-11	TCGA-EJ-7330-11	TCGA-ZG-A9LU-01	TCGA-KK-A7B0-01	TCGA-KC-A7F3-01	TCGA-KC-A4BL-01	TCGA-QU-A6IO-01	TCGA-M7-A721-01	TCGA-V1-A9ZK-01	TCGA-G9-6356-01	TCGA-KK-A7AV-01	TCGA-EJ-5511-01	TCGA-EJ-5497-01	TCGA-CH-5761-11	TCGA-EJ-7789-11
Biochemical Recurrence	NO	NO	NO	NO	NO		NO	NO	NO	NO	NO	NO	NO	NO	NO	NO	NO	NO	NO	NO	NO	NO		NO	NO	NO	NO	NO	NO	NO	NO	YES	NO	NO		NO	NO	NO	NO	YES	NO	NO	NO	NO	NO	NO	NO	NO
Clinical M		M0	M0	M0		M0	M0	M0	M0	M0	M0	M0	M0	M0	M0	M0	M0	M0	M0	M0		M0	M0	M0	M0	M0	M0	M0	M0			M0	M0	M0	M0	M0	M0	M0	M0	M0	M0	M0	M0	M0	M0	M0	M0	M0	M0
Clinical T		T1c	T1c		T2a	T2a	T1c	T1c	T2c		T2c	T3b	T1c	T1c	T3a	T1c	T2a	T1c	T3b	T2c	T1c	T1c	T1c	T1c	T2c	T1c	T2a	T3b	T2c	T2c		T2c	T1c	T2c	T1c	T1c	T2b	T2b	T1c	T1c	T1c	T1c	T2a	T1c	T1c	T2b	T2c		T1c
Gleason Score	8	9	7	7	7	7	7	9	7	7	7	7	9	7	7	6	7	7	7	7	6	9	7	7	7	7	8	8	8	9	6	7	8	6	7	7	9	9	7	7	6	7	8	9	7	7	7	9	7
Pathologic N	N0	N0	N0	N0	N0	N0	N0	N1	N0	N0	N0	N0	N0	N0	N0	N0			N0	N0		N1	N0	N0	N0	N0	N0	N1	N0	N0	N0	N0	N0		N1	N0	N0	N0	N0	N0	N0		N0	N0	N0	N0	N0	N0	N0
Pathologic T	T2c	T3b	T2c	T2c	T4	T2c	T3b	T3b	T2c	T2c	T3b	T3b	T2c	T3a	T3a	T2c	T2c	T3a	T3b	T2c	T2c	T3a	T2c	T2c		T2c	T2c	T3b	T2c	T3b	T2c	T3a	T3a	T3a	T2c	T3a	T3a	T3b	T2c	T2c	T2c	T2c	T3b	T3b	T2c	T3a	T2c	T3b	T3a
Psa Value	0.1	0.13	0.1	0.1	0.01	0	0.03	0.1	0.1	0.04	0.1	10.8	0.015	0.1	0.1	0.1	0.03	0.03	0.03	0.1		0.3		0.03	0.1	0.03	0	0.1	0.1	0.01	0.01	0.7	0.03	0.05	0.1	0.1	0.7	0.1	0	3.15	0.1		0.01	0.13	0.1	0.04	0.1	8.49
Residual Tumor	R0	R1	R0	R0	R1	R0	R0	R1	R0	R0	R0	R0	R0	R0	R0	R0	R0	R1	R0	R0	R0	R0	R0	R0	R1	R0	R0	RX	R0	R1		R0	R1	R0	R0	R0	R1	R0	R0	R0	R1	R1	R0	R1	RX	R0	R0	R0	R0
Sample Type	Solid Tissue Normal	Solid Tissue Normal	Primary Tumor	Primary Tumor	Solid Tissue Normal	Primary Tumor	Primary Tumor	Primary Tumor	Solid Tissue Normal	Solid Tissue Normal	Solid Tissue Normal	Primary Tumor	Primary Tumor	Primary Tumor	Solid Tissue Normal	Primary Tumor	Primary Tumor	Primary Tumor	Primary Tumor	Solid Tissue Normal	Primary Tumor	Primary Tumor	Primary Tumor	Solid Tissue Normal	Primary Tumor	Solid Tissue Normal	Primary Tumor	Primary Tumor	Solid Tissue Normal	Primary Tumor	Primary Tumor	Primary Tumor	Primary Tumor	Solid Tissue Normal	Solid Tissue Normal	Solid Tissue Normal	Primary Tumor	Primary Tumor	Primary Tumor	Primary Tumor	Primary Tumor	Primary Tumor	Primary Tumor	Primary Tumor	Primary Tumor	Primary Tumor	Primary Tumor	Solid Tissue Normal	Solid Tissue Normal
miR-183	8429	11.07	10.28	11.09	10.57	10.28	9883	12.18	9631	9926	8558	12.89	12.65	11.4	9161	11.49	12.84	12.89	13.29	9488	11.03	11.25	13.25	10.13	11.07	9666	12.98	12.18	9483	14.33	10.24	11.9	11.2	9951	10.8	8606	12.52	11.27	12.06	10.53	12.81	11.87	11.53	12.84	11.75	13.92	12.91	10.19	9401
MUC21	8216	8053	6819	6.39	5.94	5794	5727	5717	5546	5.48	5016	4651	4453	4424	4204	4134	4117	3939	3922	3902	3859	3733	3678	3671	3.6	3575	3568	3493	3459	3285	3272	3109	3079	3079	3075	3.02	2925	2884	2843	2799	2.79	2775	2757	2662	2646	2575	2506	2.48	2402
MUC21	8216	8053	6819	6.39	5.94	5794	5727	5717	5546	5.48	5016	4651	4453	4424	4204	4134	4117	3939	3922	3902	3859	3733	3678	3671	3.6	3575	3568	3493	3459	3285	3272	3109	3079	3079	3075	3.02	2925	2884	2843	2799	2.79	2775	2757	2662	2646	2575	2506	2.48	2402
ESYT2	11.33	10.67	11.65	11.17	10.82	11.11	11.28	11.26	11.35	11.1	11.42	10.07	11.34	11.5	11.54	11.31	10.98	10.92	10.84	11.66	10.72	10.74	10.03	11.1	10.78	10.96	11.5	11.11	11.13	11.7	10.94	11.39	11.02	10.94	11.67	11.39	10.34	10.6	10.95	11.41	9.85	11.03	10.71	10.99	10.92	11.3	11.2	10.84	11.21
SSPO	3947	3828	6638	4.37	4063	3941	2.29	5133	4.03	4413	3641	4.68	7.13	7322	2925	2.33	6.89	6319	5309	4261	3.82	4937	5403	1976	2335	2082	7904	4315	3406	7052	7641	7835	4818	1361	5168	4001	4377	4786	5952	6317	7049	5406	6744	5447	6524	5371	5249	4.9	4666
LAMB4	0.4978	2746	3579	0.7574	0	1427	4.11	0.9239	1982	0.3262	1681	0	2105	0.9485	1528	1228	0	2771	0.627	1846	2032	1083	0	0.8786	1596	2082	4074	2072	0.848	2918	2288	3057	0.9793	0.8351	4369	2308	0.9574	0	1.16	1187	1638	1.56	0.7824	1874	1634	0.9596	1434	0.5439	1726
XIRP2	0	0	0	0	0.4407	0	0	0	5038	0	0	0	1303	0.9485	5308	0.9222	0	0	0	0.4054	0	0.6406	0.6196	0.5052	0	0	0	0	0.848	0	0	0	0	9024	0	0	0	0	0	0	0.8839	0	0	0.8166	0.6098	7157	0	0	0.411
MEGF11	3001	1477	0.9652	2154	2669	0	0.7716	1884	0.6688	2104	2.55	1344	6166	1664	3315	2.33	1175	3316	2266	2.63	2032	1083	2404	2122	1332	1146	4322	1548	2433	3641	2197	2221	0	0	2642	2308	1936	1376	1956	2506	0	1972	1287	2146	2227	2107	1829	1247	2402
CDHR4	1161	0.4401	0	0	1652	0.5082	0.4368	1697	0.6688	2265	0	0.5975	0	0	0.9576	0	0.7039	3852	3108	0	0	0	0	1421	0	0.4897	0	0	1138	1066	2197	0.6874	1199	0	0	0	0	0	2667	0	0	3288	0.4436	0	0	0	0.8885	0	0
CCDC88B	7599	7.93	8913	7999	7246	7201	7304	8751	7348	7339	7002	8412	7569	6.94	7332	7.92	6.89	8734	7209	8008	7141	9093	9067	7313	6738	6967	7105	5891	7192	7352	7626	7147	7404	7077	7548	7259	8204	9913	7518	8205	9.7	7521	6.72	7085	9.13	6415	6615	7703	6923
TMEM8B	9805	10.03	10.23	9999	10.44	10.07	10.19	9582	9932	10.17	10.03	10.62	9957	9761	10.32	9709	9988	9098	9266	9992	10.4	10.17	10.93	9884	9556	10.34	9774	10.29	9572	9344	10.14	9922	9725	9696	10.22	10.1	9884	9755	9516	10.2	10.84	9891	9928	9568	9904	9341	9296	10.22	9.79
C2CD4B	7098	5049	5486	6172	6542	5.96	5575	4244	4155	6753	6.18	3989	3541	4723	6643	6173	5102	6762	5185	5786	3413	5697	7215	4732	3874	6939	4477	3066	5027	1.4	5081	2629	5758	3955	4241	6.18	6105	4729	6.43	6949	4788	1972	2757	2901	4978	2836	3783	4522	3259
SIGLEC16	2468	3024	3259	3.16	2961	2875	2485	3854	2273	3019	2314	3121	1679	2648	2103	2.33	1175	4098	2688	2291	2679	2592	4095	3468	2715	2549	2343	2369	2202	2918	2739	3003	1557	2409	1857	1573	3093	3328	3647	2506	3981	1781	2411	2265	2763	2393	1992	2594	2861
COL6A6	1161	0.7768	1538	2262	1652	3363	1797	2333	1.47	4324	0.5276	0	1835	2575	1528	2047	1.53	0	0.627	2471	1.11	1924	1653	1631	2183	1388	0.5385	1958	0.848	0	1883	1906	1969	2299	0	0	3244	1045	1795	1434	1638	1781	0	1538	1037	0.7728	1829	3968	0
MYO1G	6531	6815	7526	7094	5632	6388	6164	7878	6991	6701	6537	6124	7148	7528	5046	7172	5733	6236	8247	7498	6.77	8522	6386	5465	7.26	4351	9029	5447	7837	6705	6982	7234	6418	5197	3628	7349	7218	7816	6542	6741	7614	6802	5951	8237	8131	6602	8188	6359	6825
TARM1	0	0	0	0	0	0	0	0.9239	0	0	0	0	0	0	0	0	0	0	0	0	0	0	0	0	0	0	0	0	0	0	0	0	0	0	0	0	0	0	0	0	0	0	0	0	0	0	0	0	0
PDLIM1	12.68	12.06	12.14	12.21	11.81	11.76	11.67	11.61	11.1	12.17	11.17	12.04	11.16	10.57	11.97	12.12	10.9	12.31	10.81	11.55	11.31	12.23	11.62	11.5	11.35	12.2	10.21	10.91	11.06	10.36	10.99	10.23	10.82	11.47	12.7	11.64	12.34	12.1	11.3	11.62	11.04	10.25	10.55	11.03	10.93	9085	9907	11.1	10.96
SNAP23	10.5	10.96	10.55	10.97	11.13	10.73	10.64	11.05	11.11	11.07	10.8	10.34	10.85	10.61	10.68	10.88	11.04	11.21	11.08	10.83	11.05	10.43	9617	10.87	11.02	10.64	11.02	11.28	11.71	10.23	10.97	10.87	10.89	11.08	10.57	10.69	10.45	9848	11.35	10.48	10.02	11.51	11.27	10.84	11.12	11.15	11.61	11.16	11.35
LGALS9	9321	9827	9137	9898	9142	8933	8941	9183	8872	8903	8381	9118	9219	8162	8659	9331	7793	9.13	8.08	9273	8194	9698	9651	8735	8892	9261	7407	7406	8637	9462	8592	7847	8747	8486	8688	9345	9997	10.49	8084	9383	9404	8238	8.09	9167	9.61	6817	7486	8508	8443
STXBP3	9945	9718	9829	9944	9616	9405	9534	9666	10.25	9879	9892	9249	9508	9659	9837	9527	9627	9444	9724	10.02	9585	9334	8354	9779	9513	9465	9746	10.28	10.32	9476	9386	9646	9499	9762	9925	9836	9.22	8133	9624	9.72	8309	9.79	9748	9.37	9598	9714	9958	9654	10.05
ARVCF	8485	8895	9202	8.62	9256	9063	8915	10.09	8786	8.42	8752	9891	9644	8932	9406	8982	10.09	9445	10.03	8725	9524	9983	10.06	9231	9306	8967	10.75	8903	8.51	9988	9596	9433	9471	9.01	8207	8318	9128	9728	9757	9.54	10.66	9451	9498	9575	9977	9789	8932	9523	8769
AP3B1	10.32	10.15	9999	10.26	9925	10.1	10.15	9.87	10.35	10.21	10.42	9586	10.08	10.63	10.05	10.16	9675	9742	9836	10.23	10.33	9838	8587	10.15	10.17	10.01	9.87	10.5	9802	9.78	10.37	10.2	9981	10.06	10.83	10.12	9543	9056	9981	9894	8533	10.23	10.21	10.13	9835	10.23	10.55	10.05	10.15
RHOD	8288	8949	8333	8159	8.57	8154	8652	7958	8097	8062	8145	9622	9.21	8358	8298	8918	8554	8.91	9759	8121	8426	9.52	10.36	8612	8811	8.85	9006	7716	8844	8853	8158	8178	8745	8968	8236	8891	9363	9377	9055	7731	7.88	8971	8547	8.66	8375	8087	7893	8555	8306
LGALS8	10.03	9367	9633	10.35	9245	9689	9522	9949	10	10.65	9756	8.73	8304	9787	9076	10.1	10.03	9615	10.44	10.05	9601	9098	8777	9061	9185	9484	10.31	9803	9529	10.06	9522	10.17	10.06	9151	9573	9866	9843	9367	10.12	9267	8438	10.45	10.25	9577	9414	9488	10.11	9667	9719
SIRPB1	5895	4831	4998	6487	4368	5979	5037	5602	6544	5975	5754	3356	4888	5607	4775	5676	4357	2673	3108	6962	4398	4105	2787	3931	3923	5059	4838	4945	6022	4027	4976	5716	5143	4418	5874	6172	4823	5.04	5202	5941	0	5153	4353	5647	5115	4676	5114	5909	5444
MEN1	9503	10.11	9518	9643	10.21	9964	9927	9.88	9381	9495	9391	9831	10.05	9922	9456	9824	10.39	10.15	10.27	9439	9892	10.09	9769	9923	10.07	10.04	10.5	9694	9075	10.13	10.03	9.93	10.15	10	10	9349	10.47	10.49	10.26	10.08	10.22	10.32	9.99	10.13	10.21	10.07	9493	10.08	9496
CLIC1	12.8	13.02	12.33	12.42	13.03	12.68	12.69	13.1	12.44	12.63	12.22	13.58	12.72	12.55	12.41	12.89	12.68	13.57	13.4	12.29	12.86	13.51	13.73	12.95	13.16	12.91	12.6	12.53	13.39	13.46	12.93	12.21	13.15	13.36	11.73	12.62	13.19	13.59	12.93	12.43	13.88	12.98	12.99	12.76	12.8	12.59	12.48	12.62	12.97
CCRL2	5973	4122	5253	5418	3901	5.27	4223	5371	5076	5191	4321	3426	5.25	4773	4344	6071	4601	5545	4069	4947	3187	5.83	4798	4372	3823	4461	5145	2826	5823	4165	4603	4381	5792	4.25	4541	5904	5342	5426	4773	4609	4.81	4286	4275	5027	5786	3.54	4239	3208	5141
CLDN5	8434	8403	9078	7699	7246	8452	9634	8134	9589	8126	8552	12.48	8239	7042	9909	10.39	8926	10.08	9265	8794	8.99	10.23	10.34	9617	9626	7686	7504	7623	10.14	9005	7729	7553	8873	8546	8357	8803	9765	9328	9155	8394	9.07	8778	8777	8282	8593	7118	7.14	6863	10.61
LAD1	11.89	11.41	10.51	10.4	10.41	10.37	9889	10.84	10.08	10.45	9377	9877	10.6	10.56	9677	10.61	9966	10.77	10.91	10.08	9854	10.75	10.43	9651	10.69	10.7	11.21	9343	9443	10.78	10.64	10.16	10.24	10.42	11.74	9776	10.81	11.3	10.8	10.33	10.62	10.21	9529	10.07	10.49	9.86	9997	9995	9597
CHL1	6424	4884	8231	8383	6384	6135	7819	9062	8741	7739	7599	5919	4888	7.28	8326	8055	7577	9.11	5876	7762	7233	7.79	4621	7161	8361	5721	6162	6.29	7891	6705	6264	8448	7698	7808	7856	7851	6406	7.11	6871	10.04	7054	7082	7548	8092	7569	5527	8205	9927	7393
DLL1	8129	7777	9267	9211	8.59	8357	8684	9983	8953	10.26	8984	8472	8546	8456	7953	8842	9967	9034	8896	8993	8634	9.67	8.05	8992	9078	7413	9213	7414	8019	8038	8261	9054	9368	8001	7935	8503	8781	6921	10.55	9562	8644	8.83	8776	8843	9373	7477	8372	9.54	8687
SDCBP	11.64	10.96	11.35	11.55	10.86	11.22	11.11	11.65	11.27	11.42	11.32	10.7	11.43	11.26	11.39	11.74	11.4	11.94	11.48	11.62	10.99	11.36	10.55	11.07	11.18	11.05	11.32	10.93	11.47	11.65	11.21	11.38	11.52	11.5	11.71	11.51	10.69	10.42	11.67	11.38	10.73	11.68	11.82	11.48	11.62	10.88	11.7	11.11	11.22
NOP56	10.72	10.53	10.03	10.48	10.67	10.38	10.5	11.62	10.27	10.53	10.25	10.68	11.15	10.71	10.7	10.8	11.08	11.19	10.58	10.37	10.34	11.23	11.25	10.65	10.67	10.94	11.17	10.4	10.34	11.23	10.83	10.69	11.11	10.87	9961	10.6	11.25	11.51	11.55	11.04	11.55	11.15	10.72	10.94	10.86	10.78	10.58	10.43	10.41
DDX3X	13.47	12.38	13.04	13.19	12.7	12.44	12.26	12.84	12.61	13.38	12.76	11.56	12.76	12.56	12.44	12.67	12.58	12.06	12.05	12.8	12.13	11.94	11.31	11.86	12.17	12.01	13.02	12.52	12.39	11.69	12.18	12.58	12.36	11.95	12.38	12.49	11.53	10.69	12.44	12.54	11.06	12.12	12.14	12.13	12.14	12.54	12.76	12.37	12.22
CXCR6	5905	6319	7398	7725	6421	6.56	5628	7093	6744	6497	5268	5059	4738	4928	4561	5473	5366	7096	5612	6485	5429	6463	5772	4.82	3823	4513	4838	5726	7528	5518	6986	6051	5385	6434	4173	6023	6085	6902	5031	6262	6467	5406	4932	6632	7608	4244	5805	5.92	6783
CCL21	8167	4122	9019	6213	6827	7606	8886	4998	7021	8125	8341	7476	6166	7001	10.22	9718	4484	9347	7111	8677	8743	8191	7301	9.79	7426	7777	6143	3648	8436	7587	6548	7204	6705	8136	9125	9634	7306	10.1	7193	8307	5784	7262	6659	7133	7756	7855	6615	7726	8221
PODXL	9.74	8.93	10.9	10.71	8273	10.66	9469	9119	10.56	10.57	10.79	7902	11.18	10.9	9679	9917	9996	9103	9016	11	9206	9754	9664	9223	9325	9194	10.22	8944	10.05	10.46	10.02	10.95	10.18	9375	11.31	10.79	9846	9594	9396	10.01	9.36	10.76	10.17	10.83	10.27	10.51	10.94	10.48	10.24
CLDN4	14.78	14.55	14.36	14.36	15.76	14.27	13.94	13.61	13.24	15.28	12.65	12.92	13.06	13.5	13.61	13.63	15.7	11.03	13.26	13.68	13.4	13	15.04	13.35	13.19	13.31	12.26	12.5	13.47	13.21	13.63	13.05	13.59	12.89	11.83	12.68	14.24	13.65	14.47	13.8	14.21	13.36	12.93	12.69	13.16	13.07	12.27	13.65	13.49
ISLR	8904	8887	11.15	9.48	10.08	10.18	10.47	9954	9795	10.02	10.35	10.19	10.41	10.05	11.09	11.51	8958	11.39	9291	10.96	9544	10.98	11.19	11.26	9503	10.8	8634	8658	9732	13.11	9.12	9.42	10.4	9183	10.16	11.21	9991	11.23	9437	10.18	10.59	10.05	9606	10.48	10.35	9827	9542	8855	10.27
PTPRT	3001	3.31	4181	6912	2894	7297	3779	5729	5012	6087	5993	3558	7.06	8032	5786	6655	10.55	3107	8.5	6752	5294	4799	3849	5276	4103	5796	7275	5314	3.7	5633	6292	11.95	9494	8254	9002	4001	4166	4037	9125	5951	6831	5607	6754	8135	7202	6341	6622	5286	5207
ASTN1	2844	1477	3185	2362	3.83	6352	2656	4.78	3424	3229	5592	4.08	2528	3.64	7525	5761	2866	3316	2421	1971	3897	2946	3738	4963	2715	4873	0	5348	1926	5212	1628	3208	2.55	4.83	8527	3277	2513	3473	2843	1645	0	3288	2084	2016	2055	5242	2884	0.5439	1213
TXNDC9	8673	8705	8401	8955	8739	8629	8551	9139	8914	8939	8632	8.87	8976	8725	8.62	8599	8965	8706	8965	8512	8652	9128	8767	8245	8998	8349	9104	9019	9784	8811	8685	8562	8851	9058	8585	9032	8528	8606	8932	8649	9.12	8958	9018	8761	8976	8757	9196	8722	9203
SOCS6	9.73	9513	9888	9896	9107	9328	9624	9182	9764	9473	9568	8609	9453	9513	9199	9045	8.75	8825	9.21	9919	9236	8.66	8165	8752	9183	9295	9339	9763	9777	8486	8678	9803	8583	9403	9514	9418	8621	7714	8921	9625	8.06	8975	8991	9228	9075	8443	9754	9334	9559
UBFD1	10.14	10.7	10.12	10.33	10.26	10.58	10.55	10.79	10.45	10.26	10.63	9935	11.24	10.46	10.1	10.11	10.44	10.57	10.48	10.32	10.51	10.16	9748	10.37	10.54	10.47	10.85	10.81	10.19	10.23	10.44	11.07	10.47	10.57	10.46	10.2	10.4	9719	10.74	10.68	9.88	10.66	10.51	10.8	10.51	11	10.81	10.52	10.57
NCAN	2572	0.7768	0	1026	1.28	0.8833	0	0.9239	1124	0.5922	1217	0	2701	1163	5274	0.9222	0	0	0.627	0.7216	1347	0.6406	1052	1631	1008	0	0.5385	0.972	0.4854	0	0.923	0.9377	0.9793	0	1671	1128	0.9574	1045	0.4973	0	0	0.9813	0	0.8166	0.6098	2393	1434	1247	1213
AP3D1	11.52	11.88	11.79	11.68	11.66	12.09	11.9	11.99	11.71	11.58	11.85	11.94	12.69	12.09	11.9	11.85	12.09	11.16	11.94	11.7	12.02	12	11.8	11.72	12.01	11.52	12.32	11.72	11.05	11.65	11.99	11.95	11.94	11.68	12.17	11.51	11.57	11.83	11.93	12.06	11.81	12.26	12.01	11.97	11.93	11.94	11.84	11.92	11.48
CCS	9223	9696	9049	9307	10.22	9269	9366	10.03	8901	9305	8899	11.41	9525	8802	9626	9627	9565	10.62	10.16	8735	9672	10.8	11.73	9945	9985	9723	9664	8857	9301	10.2	9636	8585	9469	9634	9264	9255	10.22	11.1	9775	9719	12.1	9665	9389	9409	10.13	8922	8694	9657	9104
TOR1A	9.8	9945	9483	9676	10	9869	9745	10.18	9691	9736	9702	9906	10.26	9828	9913	9947	10.17	9839	10.28	9753	9694	10.07	10.03	10.19	10.28	9946	9.88	9.88	10.23	9507	10.02	9729	10.34	10.42	9665	9913	9655	10.07	9898	9981	10.23	10.25	10.22	10.41	9889	10.01	9943	9.91	9943
STX16	10.58	10.16	11	10.8	10.88	9896	9714	10.16	10.28	10.84	10.12	10.29	10.11	10.45	10.83	9675	10.51	9891	10.05	10.5	10.63	10.36	10.52	10.12	9607	9829	10.67	10.25	10.27	10.48	10.32	10.53	9864	9348	10.24	10.07	10.86	9788	10.35	10.84	10.01	10.3	10.22	9855	10.61	10.25	10.23	10.22	10.29
ADAM10	11.33	10.97	11.22	11.23	10.13	10.84	11.2	10.31	11.85	11.06	11.34	8.76	10.96	11.34	10.22	10.25	10.79	7424	9677	11.51	10.91	9145	7632	9.95	10.85	9739	11.14	11.7	11.46	9163	10.81	11.63	10.85	10.82	10.87	11.05	9056	7654	10.63	10.66	7045	11.25	11.95	11.04	10.37	11.3	12.07	11.15	11.4
ITGB1BP1	9024	9413	9434	9178	9425	8976	8992	9494	9183	9194	9058	9816	9624	8871	9982	9345	9102	9.22	9506	9118	8995	9736	9425	9522	9219	9087	8958	8762	9701	9995	8811	9.02	9533	9474	9065	9769	9855	9802	9129	9228	9.68	9.23	9522	9373	9358	8858	8901	8814	9333
NRP1	10.38	10	10.83	10.16	9554	10.5	10.59	10.14	10.43	10.19	11.24	9602	12.33	10.89	9954	10.99	9667	9649	12	11.18	9572	10.64	10.21	10.2	10.25	10.48	10.29	10.1	9977	9842	9.59	11.53	10.47	9951	11.08	11.2	9304	8647	10.02	10.51	8856	10.39	10.13	11.38	10.28	9838	11.31	9824	10.19
TNFSF11	0.4978	2746	1947	0.4278	2497	1181	2573	0	2085	0.3262	1681	2616	0.7939	1664	0	1882	0	3852	1063	2966	1889	1083	1384	1631	0.5906	2645	1893	0.972	3.17	2425	0.3771	1151	1199	1122	6183	1368	0	1645	1.16	0.5115	0.5086	0.9813	0	0.4654	2646	0.7728	2708	0	1863
TSPAN4	8518	8123	9469	9.06	8803	8978	9412	8643	8829	8926	9368	9856	9403	8435	10.05	9.71	8051	9878	8478	9547	8764	10.21	10.46	9514	8474	9.47	8928	7822	9299	10.35	8679	8585	9171	8468	7901	9616	9.55	10.37	8443	9376	9982	8872	8826	9207	9535	8.46	7774	9165	8792
KLF11	9826	8616	9.33	9916	9124	9275	9533	7658	9.26	10.43	9745	8076	8823	9315	9547	9112	9296	8193	8228	9711	8259	8678	8.71	8649	8509	8809	8987	8.51	9.3	8653	8621	9294	9142	8.93	9445	9885	8847	8.39	8556	9108	8172	8172	8558	8645	8292	8434	9187	8839	9338
GIPC1	10.89	11.19	10.75	10.48	11.02	10.71	10.85	10.62	10.32	10.27	10.41	11.69	11.19	10.65	10.84	11.09	10.66	11.1	11.47	10.48	11.1	11.57	11.99	11.09	11.15	11.27	10.83	10.3	10.73	11.03	10.97	10.13	10.72	10.82	10.92	10.83	11.24	12.02	10.92	10.9	11.76	11.03	10.9	10.8	10.78	10.29	10.16	10.91	10.69
PCDH17	6404	4531	8001	6436	3717	9015	6674	6752	6748	7766	7654	3426	6181	7453	5926	8946	6233	4976	4641	8091	5322	6298	4905	4883	5556	4168	6645	5004	7425	5755	6085	7381	7222	5814	5797	8171	4916	5063	6141	12.08	5557	7023	6.72	7264	7073	6856	7788	6775	7315
CASK	10.05	9621	9818	9991	9368	9517	9387	9404	9827	9696	9956	8908	9976	9.83	9593	9778	9.21	9181	9145	9781	9374	9272	8679	9566	9295	9527	9721	9.56	9422	9373	9.43	10.01	9341	9.8	9269	9657	9145	9107	9512	9494	8411	9697	9606	9576	9318	9327	9896	9728	9409
PPP1R12A	11.23	10.09	11.21	10.98	10.95	11.06	10.91	10.42	11.28	11.15	12.03	9591	10.27	11.14	12.01	10.8	10.3	10.48	10	11.58	10.8	9831	9577	11.06	10.23	11.07	10.38	11.08	10.88	9847	10.43	11.28	10.54	10.57	11.36	11.89	10.05	9134	10.28	10.82	9121	10.36	10.99	10.6	10.2	10.95	11.1	10.75	11.08
GAK	11.11	11.27	11.35	10.65	11.07	11.3	11.09	11.43	10.79	10.66	10.85	11.47	11.32	11.13	10.88	10.98	11.25	10.86	11.53	10.81	11.26	11.49	11.4	10.94	11.16	11.06	11.29	10.84	10.29	10.76	11.39	10.78	11.42	11	10.89	10.48	10.86	11.57	11.27	11.22	11.57	11.38	11.04	10.89	11.43	10.99	10.78	11.27	10.83
PDZD2	7951	7398	8.42	8593	6836	8563	8476	7162	8819	8875	8428	6294	8838	8682	8232	8.06	7572	7214	6425	9182	7384	6577	6663	7148	6524	7179	8413	7.82	7804	8385	7591	9633	7492	7061	8846	8167	7614	7.03	7509	7928	5.75	7683	9968	7996	7561	8682	8188	7756	8307
SPTBN2	10.71	10.98	11.4	10.59	10.27	11.76	11.27	11.58	11.43	11.11	11.34	11.34	11.43	12.43	10.37	10.89	12.62	9852	11.51	10.85	11.68	11.31	11.5	10.57	11.34	9713	11.59	11.72	10.84	11.25	12.41	12.34	12.04	11.37	9636	10.6	11.07	11.64	11.91	11.27	12	12.95	12.8	11.65	11.41	12.84	11.89	11.61	11.39
PLXNB2	13.12	13.58	13.61	13.3	13.14	13.78	13.58	13.4	13.33	13.16	13.43	13.3	13.57	13.76	13.27	13.31	13.48	12.86	13.7	13.39	13.42	13.31	13.37	13.13	13.32	13.23	13.07	12.97	12.47	12.56	13.83	13.2	13.72	13.3	13.56	13.05	13.22	13.6	13.73	13.51	13.79	13.99	13.5	13.55	13.44	13.28	13.51	13.8	12.89
SEMA3E	8033	6567	9058	6874	7259	8346	8383	6646	8094	6919	9444	5607	7501	8962	7632	9048	6835	6063	7.51	8.14	6573	5978	6.51	8196	6571	7562	3724	7951	7842	6266	7723	7.61	8093	7217	6528	10.09	6.76	5.92	8208	7953	5941	8112	8217	7563	6.33	7.77	7372	8373	8627
SMAD7	9355	9171	9873	9734	9481	9422	9489	7.73	8895	9559	9373	7889	8781	9472	9.46	9034	8887	9688	8297	9874	8621	8711	9182	8991	8589	9673	8.31	9055	8.79	9681	8.96	8919	8752	8371	8524	9527	8888	8.62	8053	9556	7543	7.83	8186	9027	8669	8599	8355	9456	8981
ANGPT2	7.44	4884	7577	5.94	5156	7155	6592	6377	6415	5828	8343	4035	7435	7675	7328	6514	5344	8.13	5807	7262	6058	6846	5143	7042	5508	6355	6537	4.99	6773	7893	4989	7286	6677	6071	6501	8088	6065	5641	5619	5848	5139	6422	6232	6.57	6222	5874	6019	5721	6161
ARPC1B	10.62	10.51	10.9	10.64	10.03	10.45	10.45	10.99	10.41	10.64	10.4	11.3	10.7	10.11	10.78	10.83	10.37	10.62	10.75	10.81	10.73	11.57	11.07	10.71	10.9	10.57	10.04	9.78	10.96	12.02	10.47	9891	10.48	10.3	11.16	10.98	10.94	11.9	10.38	10.8	10.97	10.65	10.23	10.61	11.01	9671	9828	10.5	10.91
ARPC2	12.52	12.22	11.92	12.13	11.7	11.69	11.76	11.88	11.82	12.08	11.73	11.99	11.87	11.38	12.18	11.79	11.4	11.39	11.72	11.77	11.77	12.17	11.44	11.49	11.73	12.17	11.32	11.71	12.21	11.93	11.82	11.18	11.79	11.88	11.97	12.11	11.88	12.14	11.43	11.64	11.23	11.36	11.49	11.73	11.61	10.98	11.34	11.56	11.81
ARPC3	11.51	11.63	10.96	11.5	11.67	11.01	11.35	11.71	11.4	11.34	11.27	12.16	12.09	11.31	11.31	11.88	11.25	11.83	12.37	11.18	11.81	12.27	11.84	11.89	12.06	11.56	11.58	11.64	12.28	11.79	11.68	11.06	11.81	11.52	11.41	11.53	12.19	12.37	11.73	11.1	11.76	11.84	11.83	11.78	11.6	11.22	11.7	11.16	11.67
ZBTB7B	11.58	11.04	11.22	11.06	10.75	11.19	10.86	10.63	11.02	11.26	10.98	10.84	10.93	11.59	10.57	10.93	11.42	11.69	11.08	10.93	11	10.77	11.12	10.63	11.12	10.77	12.16	11.17	10.65	10.77	11.77	11.12	11.44	11.11	10.33	10.5	10.85	10.75	11.17	11.18	11.37	11.86	11.98	11.08	11.43	10.99	11.12	11.46	10.99
ADAMDEC1	2356	3.41	2402	6407	1478	3477	3.35	6006	5935	4.02	5348	3203	3541	4444	0.9576	4274	3547	3939	2688	5399	3739	6235	0	2376	2183	1937	4386	3222	7522	6171	5203	5268	5281	1745	0	4.78	3727	5372	3549	5041	3818	4009	5046	6405	6588	4594	4984	2798	5294
LAMA5	12.59	11.57	13.38	12.04	11.71	12.1	11.54	11.23	11.67	12.1	11.97	11.9	11.38	12.2	12.56	11.35	11.74	10.31	11.33	12.26	12.16	11.58	12.06	11.37	11.23	11.34	12.08	11.57	10.39	11.5	12.14	11.84	11.86	10.48	11.98	11.37	12	11.61	11.66	12.12	11.45	11.87	11.79	11.37	11.54	11.47	11.71	12.25	10.97
ZNF185	11.15	10.59	10.56	11.15	11.41	10.37	10.84	10.03	10.47	11.47	9609	10.53	8745	9778	11.76	10.27	9372	7873	9198	10.95	11.43	9979	10.29	11.68	9778	11.11	8225	10.67	9.92	9156	9391	10.13	10.62	10.5	13.54	10.39	10.41	9902	9929	10.19	9384	9877	10.23	10.49	9139	8602	9961	10.37	10.4
NPHP1	6858	6731	7149	6908	6664	6417	6618	6221	6902	7007	6844	6895	6644	6555	7099	6022	6.28	5321	6016	6.84	6.59	6954	6592	6503	6392	6567	6162	6348	7106	6882	6817	6698	6901	6268	7262	7093	6709	6702	7221	6646	6889	6839	6633	6493	6572	6023	6615	6636	6.73
INPPL1	10.96	10.77	11.25	10.91	11.12	11.12	11	10.71	10.95	11.25	11.16	11.16	11.66	11.37	11.24	10.84	11.54	10.47	11.32	11.04	11.35	11.34	11.35	11.04	11.17	10.82	11.69	11.09	10.58	11.67	11.44	11.4	11.41	10.74	10.75	10.88	11.05	11.49	11.2	11.47	11.15	11.62	11.5	11.16	11.27	11.56	11.14	11.19	10.81
SOX12	8135	8729	9021	8.42	9318	9481	8746	8516	8454	8423	8798	9.46	8933	9203	8975	9461	10.41	9.99	9272	8.65	8993	8854	10.34	9471	9273	9717	9.96	9102	8344	10.47	9351	9781	9856	8965	9782	8902	10.18	10.14	9.62	9399	10.63	9798	9064	9726	9811	9568	9305	9107	8509
SIGLEC5	4405	2746	3841	4244	1.28	4439	4379	4023	4859	3605	4443	3356	4353	4246	2833	4307	2255	1883	3108	5.26	3464	4196	2404	2122	3823	3669	2875	3172	4733	4121	3272	4.05	4623	2179	3347	5549	1936	4477	3.33	2.61	0.8839	2669	3322	4.43	4392	3.54	3593	3408	3758
NCAM2	4753	5587	6414	4939	5997	5332	6883	6811	6099	5396	5942	5695	11.56	5904	6676	4402	6026	5385	5.66	5119	5783	4827	5828	7005	5.54	4791	3.82	6855	6166	2097	6793	5.06	7461	7175	5.51	5.7	4088	4.7	5311	6196	5645	6133	6542	5602	5866	4244	6531	5476	5.73
CCL25	0	0.7768	0	0	1948	1181	0.4368	1483	0.6688	0.5922	0.5276	1.61	0.7939	0.9485	0	1228	0.7039	3807	1896	0.7216	0.471	1083	4266	0	0.5906	0.8548	0	1.19	0.4854	3509	0.3771	0.9377	0.9793	1361	0.9059	0.4804	0	1045	1404	1645	3106	1299	0.4436	1335	2381	0	0.5116	0	0.992
CAPN5	10.58	11	11.17	9209	10.36	10.57	11.22	10.6	10.51	10.64	10.32	11.12	11.11	10.03	9971	9701	10.86	10.55	9924	10.42	10.78	10.45	11.02	10.73	10.69	9.89	12.07	11.41	10.91	9591	11.19	11.22	10.74	10.96	9932	10.25	9769	9341	10.2	10.62	10.69	9794	9624	10.39	11.42	8724	10.33	9945	11.08
YKT6	10.51	10.96	10.53	10.54	10.65	10.83	10.58	11.09	10.56	10.56	10.65	11.46	11.27	11.26	10.86	10.8	11.41	11.23	11.11	10.37	11.02	11.2	11.3	10.88	11.24	10.92	10.9	10.78	10.81	11.74	11.15	10.37	11.21	11.04	11.02	10.54	11	12.03	11	10.77	11.59	11.33	11.15	10.88	10.96	10.87	10.68	10.87	10.74
ARPC5	11.09	11.28	10.85	11.35	11.15	10.83	11.15	11.22	11.38	11.03	11.18	11.47	11.32	10.89	11.08	11.49	10.88	11.66	11.15	11.3	11.04	11.56	11.29	11.19	11.19	11.16	11.48	11.03	12.01	11.71	10.83	10.8	11.06	11.35	10.91	11.59	11.47	11.51	11.05	11.03	11.04	11.03	11.32	11.15	11.27	10.55	11.09	10.93	11.55
SOCS1	5703	5842	7899	6193	6.88	6893	6357	6075	5955	6919	6597	5907	5561	5747	7018	6674	5646	8.25	6425	6464	5221	7374	7502	7255	4601	5641	6551	4219	6443	6317	6557	5566	6046	5357	6226	7427	6683	6382	8144	6262	5891	5578	4.22	5614	6473	3831	5431	5086	5954
PDPK1	10.21	9837	10.9	10.48	9668	10.67	10.25	9633	10.88	10.65	10.74	8742	10.46	11.21	10.43	9565	10.66	9188	9602	10.85	10.52	9106	8656	9698	10.04	9815	10.59	10.81	10.13	9641	10.73	11.37	10.49	9.88	10.5	10.29	9623	8797	9887	10.19	8388	10.61	10.82	10.31	9996	11.59	10.98	10.99	10.62
RS1	0	2074	1538	1911	1948	2497	1043	1697	1982	1599	1468	2199	0.7939	0.6959	2103	0.5336	1175	0	1668	1.2	2281	2297	2543	1814	1596	1388	2579	0.972	1138	0.629	1481	1649	1199	2048	2168	1368	2513	2659	1795	1829	1822	0.9813	2.31	1099	1634	0.5582	1434	2221	0.411
CLDN3	10.19	11.89	11.36	11.13	13.47	12.37	12.28	11.64	10.48	11.48	10.31	14.3	13.43	10.73	12.23	12.75	13.8	11.71	13.11	10.65	12.59	12.37	14.91	13.07	12.62	12.69	12.75	12.05	10.87	11.9	12.33	11.55	13.14	11.64	10.48	9897	13.41	13.12	12.9	12.41	14.42	12.78	12.52	11.08	12.63	11.68	11.26	12.57	11.92
FLRT2	8396	6388	9134	8116	8448	8452	8729	6672	8.76	8483	9472	7368	7861	8932	8647	8909	7.07	7105	5979	9646	7631	7652	7281	9213	7745	8.49	6198	7959	7.66	7954	7489	8582	8361	7716	8213	10.28	6696	6746	7229	8396	5287	8055	7233	8986	7616	7874	8886	7738	7924
PLXNB1	11.84	11.11	11.83	11.62	11.73	11.26	10.95	11.36	11.41	11.89	11.23	11.82	11.19	11.41	11.52	10.62	11.68	10.37	11.14	11.35	11.74	11.62	11.97	11.38	11.14	10.89	11.77	10.87	10.51	11	11.55	11.88	10.97	10.49	11.11	10.7	11.83	11.54	11.45	11.89	11.82	11.5	11.21	11.37	11.21	11.43	11.17	11.48	11.1
ARHGAP6	10.21	11.3	10.81	10.79	10.98	10.91	11.03	10.92	11.13	10.68	10.64	11.03	10.41	10.98	10.49	10.72	10.61	10.64	9931	10.9	11.54	10.37	10.14	11.11	11.28	10.76	10.23	11.57	10.82	9.61	10.81	11.62	10.79	10.68	12.07	10.46	9881	8071	10.9	10.6	9587	10.69	11.5	10.75	10.77	10.63	11.25	10.74	11.2
ADAM12	4775	2959	6.5	3505	3717	3303	4427	4435	4512	3479	4443	1834	4906	5133	3094	4845	2866	4913	2421	5567	3562	4709	4.77	3095	4225	3575	1491	3318	4797	5933	3994	5.21	4484	2782	3347	5062	4.24	4171	3388	4137	0.8839	4964	4248	4086	4878	3652	4302	3208	3722
EFS	10.65	10.75	10.53	10.24	10.69	10.17	10.31	8046	10.54	10.48	10.5	10.96	8047	10.33	10.32	9.57	9353	9112	8708	10.14	10.55	9907	10.11	10.52	10.1	10.45	7608	9965	10.16	8745	10.69	9192	9.51	9.94	9285	10.34	9977	9152	8762	10.06	8789	9362	9292	9295	9871	7831	8977	9969	10.42
SART1	10.53	10.82	10.4	10.41	11.01	10.66	10.61	10.83	10.18	10.16	10.28	11.58	10.74	10.27	10.95	10.97	10.52	11.12	10.86	10.39	10.6	11.34	11.56	11.01	10.76	11.08	10.74	10.02	9535	10.9	10.41	10.05	10.6	10.53	10.69	10.33	11.15	11.53	10.45	10.64	11.6	10.57	10.47	10.63	10.83	10.21	9898	10.52	9707
SPINT2	13.06	13.55	12.64	13.03	13.5	13.14	13.27	13.2	12.83	12.9	12.68	13.74	14.33	13.31	12.69	13.05	13.77	13.81	13.82	12.68	13.31	13.6	13.9	13.19	13.72	13.42	12.99	12.8	13.29	13.69	13.78	12.54	13.69	14.01	13.35	12.68	13.44	14.31	13.67	13	13.94	14.01	14.02	13.16	13.57	12.86	13.11	13.72	13.22
DAPK3	9.43	9628	10.09	9932	10.03	10.58	10.01	10.46	9713	9753	10.12	11.29	10.41	9653	11.37	10.55	10.28	10.81	10.21	10.15	10.11	10.86	11.72	10.73	10.03	10.27	9867	9243	9364	9918	10.22	9534	10.34	9661	9642	10.36	10.7	11.39	10.37	10.2	11.49	10.05	10.41	9732	10.05	9742	9.01	10.2	9749
TGFB1I1	9368	7149	10.92	9.87	10.52	10.8	10.53	9.15	9796	10.23	11.25	10.86	9081	9769	12.51	11.22	8867	10.08	9351	10.71	10.84	10.22	11.02	12.23	9762	11.47	8678	8853	9406	10.17	9174	9628	10.45	10.1	10.88	11.74	10.34	10.47	9351	10.05	10.1	9977	9868	10.01	9384	9179	9239	9801	9755
MTSS1	10.07	9584	9669	9203	8764	9384	9532	8967	9795	9689	9706	8352	8022	9582	9.41	9.34	9105	9392	8553	9376	9283	8889	8191	9256	8693	9.12	8266	9.36	9278	8067	9087	9.23	9547	8945	9502	9554	9703	7946	8.72	9.26	8222	8.75	9545	9288	9132	9715	9197	8966	9607
RIPK2	8142	8701	8326	8727	8943	8748	8.59	9371	8602	8.51	8663	8596	8117	9.25	8465	9235	9564	9238	9414	8.41	8904	8564	8107	8998	9054	8309	8051	8908	8718	10.12	8.78	9037	9638	8771	7531	8056	9708	8533	9259	8757	8977	9088	8663	8959	9.06	10.09	9038	8387	8677
GRID2	1161	0.4401	1.28	0	0	0	0.4368	0.5347	0.9143	0.3262	0	0	0.7939	0.3896	0	0	0	0	0	0.9808	0	0.6406	0	1421	1008	0	2208	1548	3351	0	0	0.3843	0.4047	0	0	0.4804	0	0	0	0.5115	0	1299	1057	1099	0	0	0	0	2402
FIBP	9.5	10.07	9422	9621	10.23	9801	9.83	9993	9275	9723	9499	10.95	10.25	9584	9828	10.01	9759	10.36	10.52	9254	9871	10.75	11.04	10.34	10.33	10.27	10.16	9632	9651	10.13	9867	9475	10.18	10.31	9819	9802	10.2	11.25	9958	9962	11.28	10.14	9797	10.27	10.14	9463	9462	9914	9484
KLF4	11	10.76	12.09	12.12	11.8	11.72	10.8	10.2	10.99	12.57	10.78	8.94	10.16	11.25	11.34	10.26	12.42	9886	8638	10.8	9823	9932	10.5	9652	10.08	9213	9743	9012	10.6	8.94	11.5	10.64	10.96	9.6	9215	11.21	10.49	8875	10.3	10.56	9688	9.44	9341	9407	10.31	8781	10.65	11.7	10.21
PROM1	8327	9026	9665	10.96	8785	8251	8645	6453	10.31	7687	8233	7355	7277	7096	6415	7612	7453	3107	5966	10.09	6579	5532	7489	6192	7274	6789	3909	4143	8.46	5275	7771	8783	6705	8.58	9788	7622	7084	8048	7495	8833	6605	6.69	5882	9832	7965	5838	7424	10.95	7895
EPB41L2	9839	8618	10.68	9762	8766	9653	9857	9239	9.86	9917	10.55	8122	10.16	9588	10.56	9652	8399	8557	7536	10.72	9136	9276	7502	9051	8501	9514	8438	9082	9603	9832	8898	9436	9544	8272	9683	10.8	8718	8472	8481	9601	6949	9132	9225	9238	9.38	8895	9.31	9284	9618
BCL2L11	9573	9465	9595	9692	9114	9183	9443	8548	9872	9485	9218	8827	9003	9937	8471	8991	9478	8484	8761	9489	9162	8986	8548	8735	9031	9277	9964	10.1	9641	9778	9592	10.06	9589	9.43	9392	9212	9344	8732	8903	9225	8434	9174	9865	9.31	9.43	9425	9865	9859	9524
CHST10	7936	8356	8541	7.84	8812	8948	9014	8627	8589	8098	8468	8804	8703	8658	8234	8356	8967	8532	8413	7969	8505	8.89	9132	8.95	8927	8561	8851	9006	8.73	7852	8812	8562	8974	9319	7391	8428	9213	9408	8.5	8.59	9702	8822	8759	9084	9008	8368	8361	8741	9048
SMAD6	7246	7028	8259	6.76	8126	7676	7783	5018	7376	6361	7914	7619	6732	7311	7988	6766	6245	6689	6407	8306	7.4	6159	8306	7567	7099	8731	6405	8657	7317	7302	7405	6999	6305	6394	6767	8524	7254	7485	6262	7412	5608	7112	6972	6.94	7033	6.87	5869	7191	8023
SGCE	7202	6921	8611	8.08	8523	8435	8491	7459	8.65	8071	8.71	8.69	7956	7933	9564	7674	7678	7533	7064	8905	8364	8.33	8035	9064	7988	8574	5789	7843	9522	9479	8089	7.55	8255	8509	9275	9168	8547	7612	8267	8252	7421	7724	8416	8191	8555	6974	8246	7719	8684
TNFSF14	3001	3898	2266	3.71	1948	2385	1043	2198	2085	2773	0.5276	0.5975	1679	2.33	1271	3439	0	1482	1063	3334	1551	0.6406	0	0.8786	1332	0	1491	1834	2964	2425	1481	1783	1969	0.4772	0.523	2617	2513	1376	1795	3114	0	1781	1057	2746	3591	2025	1434	2072	2402
PSTPIP1	5121	5.33	6.56	6298	5294	6194	5112	5996	5757	5325	4116	5529	4379	4315	4894	5.53	4524	7086	5119	6371	4.64	7305	7354	5145	3.77	5618	3865	4006	6368	7347	5582	5291	4732	4365	4306	5978	5.53	7592	3693	6.23	6.58	4964	4543	5302	7.16	4132	3.87	5143	5638
SNAI2	10.86	9533	10.67	8.81	8722	8751	10.03	8901	10.71	9297	9947	9809	9037	8503	9627	10.04	8278	7601	7812	8927	9351	9973	7756	9533	8482	8365	6333	9452	9335	9124	9374	9231	8.25	8616	8851	9676	7942	7326	8483	8811	5.98	8348	7776	8901	8189	6272	9123	7477	9883
NCK2	9966	10.11	10.23	9924	9.83	10.11	9967	9786	10.13	9859	9877	9567	9809	9854	10.53	9.98	9.9	9414	10.07	10.23	10.05	9639	9107	10.1	9896	10.39	9775	9.76	9708	10.04	9703	10.06	9797	9834	9854	10.17	10.01	9484	9598	9951	8769	9855	10.09	9957	9807	10.24	9566	10.11	9832
SIGLEC6	2235	0.4401	3978	3103	2402	3.24	2573	0.5347	3501	2541	4758	0.5975	4301	3932	3171	3378	1.53	0	0	5007	2162	2122	0	1631	1008	1388	0.9298	2178	3907	1066	2531	3.94	2289	0	1857	5525	1528	1045	2102	3373	0	2874	2506	2826	4317	3625	4102	3058	3355
ACTN4	13.61	13.39	13.69	13.08	13.45	13.55	13.72	13.02	13.1	12.97	13.44	12.89	13.25	13.15	13.84	13.88	12.57	12.83	13.17	13.31	13.38	13.18	12.54	13.98	13.11	13.79	12.32	13.06	12.5	13.18	12.86	12.88	12.98	13.01	13.67	13.52	13.34	12.89	12.78	13.22	11.91	12.9	12.96	13.26	12.61	12.91	12.56	13.1	13.02
CYTH3	8005	8508	9586	9117	8397	9188	9396	10.55	9219	9096	9269	8278	10.59	9383	9516	9083	10.06	9027	9344	9695	9.4	9298	9129	9028	8668	9121	10.73	9915	8778	10.69	8436	10.13	9969	8689	8603	9196	9453	8179	9872	9613	8913	10.31	9817	9584	9645	10.09	9583	9.57	9095
MYO1B	10.24	10.44	10.57	10.51	9765	10.47	11.02	11.41	10.5	10.45	10.31	9888	11.26	11.5	9728	10.44	10.11	10.59	9805	10.84	10.22	9888	9792	10.11	10.46	10.15	10.72	11.35	9848	9907	10.26	11.16	10.37	10.32	11.44	9942	9936	8184	10.41	10.77	10.07	10.08	10.5	10.63	10.86	10.29	10.19	10.08	10.52
EDIL3	7384	4485	7887	5.94	5.02	6719	7539	5152	7454	5916	8.62	2028	6512	7542	7488	7936	5532	2673	2688	8223	5936	3393	0	5739	5104	6644	4447	6248	7872	6356	5498	7.21	6812	5721	7406	8671	2734	1045	5801	6808	0.5086	5952	5684	6505	5979	6.96	7003	5125	7546
CXCL13	7359	3145	3521	3591	4869	3632	6061	6817	4859	5.23	9906	3.79	2617	5589	4377	8796	3829	9629	4402	3902	6033	5222	4095	8826	4442	5344	2466	3648	8.52	7122	5.43	4578	1969	6238	4766	9036	3506	7616	3388	3487	3634	2554	1816	3.84	7395	2883	4422	2356	4.1
PCDH7	11.12	10.3	11.16	10.68	9819	9951	10.36	9282	10.87	11.07	10.31	9342	8461	10.55	10.48	10.34	8627	6768	8234	11.43	9.5	9.44	8777	10.4	9042	10.43	7442	10.35	9969	8945	9272	10.59	9.06	9867	12.27	10.53	9276	8068	8809	10.48	7896	8919	9239	10.15	8575	8359	9947	10.36	9927
SUSD5	5312	3863	5217	4.73	5307	5155	4584	3109	4784	5.22	7036	4035	6359	4618	6.67	4728	5075	4276	3757	5786	5403	5442	4712	6991	5186	4931	6457	4.47	5892	4615	5056	5161	6003	5873	8562	6641	4961	3078	5.57	4634	3981	5113	5917	6166	4239	4208	6712	4832	5675
NUAK1	8769	8.82	9768	9.62	7208	9551	9304	7496	9691	9591	8888	7.06	8523	9367	8321	7.51	8462	6.48	7523	10.36	9277	8603	8613	7441	8435	9088	7822	9017	8.9	8579	9.26	9649	7909	7.53	7899	9502	9948	8.75	7845	9566	7707	8117	8825	9099	9109	8516	8.37	9462	9.14
PCDHGA12	4514	3257	7182	4321	3793	6486	6008	4707	5063	4129	6214	2.49	5142	5616	6404	6002	4064	1482	2266	6238	4879	3.85	2077	5965	3772	4976	3952	6056	4186	3263	4.74	5968	4883	3324	5311	5911	2734	0.6151	4092	5856	0	4094	4587	4.43	3926	5687	5711	4659	4828
PIP5K1C	10.45	10.5	11.28	10.6	10.89	11.32	10.94	10.52	10.61	10.8	11.31	10.63	10.75	10.94	11.79	11.24	10.53	11.18	10.79	11.02	11	10.59	10.81	11.96	10.68	11.6	10.43	10.51	10.01	10.35	10.58	10.63	10.8	10.44	11.39	11.33	10.77	10.93	10.43	10.99	10.68	10.8	10.78	10.81	10.51	10.47	10.33	10.91	10.39
PPL	12.25	12.29	12.23	12.1	11.5	11.79	12.43	12.1	11.53	12.21	11.25	11.44	10.96	11.65	11.98	11.6	11.74	10.53	11.09	12.06	11.88	10.96	10.69	11.05	11.58	11.34	10.14	11.77	10.55	9063	11.73	11.32	11.46	11.41	12.1	10.79	11.67	10.64	11.62	11.6	10.86	11.51	11.8	11.49	11.38	11.82	11.17	12.18	11.23
NRP2	9904	7082	10.09	8604	9066	9567	9344	8368	9299	8276	10.21	7727	8842	9127	11.16	9501	7253	8551	7035	9916	9014	7854	8112	9689	7792	9979	7183	7997	8286	11.56	7961	9123	8756	8128	9836	10.16	8001	7535	7778	8755	7.04	7.96	8248	8519	7635	9085	8432	8036	8658
DSCAM	1161	0.4401	0	0	1.28	2.13	0	0	0.3728	1182	0	0.5975	0.4508	1163	2514	0.5336	1.53	0	0	0.4054	0.471	1083	1052	1421	0.5906	0.8548	0	0.4011	0.4854	4582	1134	0.6874	0.9793	0	2998	0.4804	0	0.6151	0.8664	0.5115	0	2292	2678	1099	1366	0.7728	0.5116	0	0
PLXNC1	6038	4508	6763	7004	3866	6396	5891	6168	7463	6302	6495	1.61	6144	6933	6477	5111	4743	2673	2266	8149	5667	4105	2787	3354	3.6	4487	4074	6725	7553	4121	5775	7392	6188	3.01	6234	7.38	4006	2067	4512	6047	1181	5663	6183	6418	6301	6523	7257	6.54	7.1
MPZL2	13.4	12.46	12.15	12.48	12.09	11.07	11.89	11.85	11.88	12.42	11.21	11.42	10.61	10.65	11.75	11.78	11.23	10.48	11.12	12.07	11.53	11.33	10.26	11.47	11.6	12	9922	11.6	12.06	10.13	10.96	10.83	10.74	11.79	12.2	11.32	11.04	10.52	11.6	12.04	9818	10.27	10.57	11.35	11.14	9.86	11.18	11.72	11.7
NPHS1	0	0	0.5619	1251	1051	0	0	0	0.9143	0.5922	0	0	0.7939	0	0	0	0.7039	0	0	0.7216	0	0	0	0.8786	0	0	1893	0	0	0	0.3771	0.6874	0.7205	1122	0	0.4804	0	2239	0	0.5115	1985	0	0	0	1037	0	0	2594	0
SORBS3	11.09	12.21	11.93	11.46	12.13	11.95	11.86	11.72	11.38	11.49	11.23	12.79	11.19	10.92	11.63	11.77	10.97	11.78	11.69	11.6	11.97	12.09	12.54	12.36	11.92	12.12	10.84	11.55	11.5	10.47	11.61	10.87	11.59	11.63	10.44	11.67	12.15	11.87	11.18	11.64	12.34	11.44	11.19	11.53	11.59	10.56	10.77	11.81	11.49
GREM1	4128	5.73	5712	7442	7279	9127	8188	6943	9.52	6913	6.29	7237	4888	8931	9658	8045	8114	5016	7962	10.46	7729	7325	7286	9009	8221	8691	7081	7073	9499	11.96	8541	7524	7707	7843	7775	7907	5086	6658	7.1	8917	4673	7574	6444	6604	5281	10.96	8812	6004	9852
EXOC3	10.28	10.41	10.41	10.38	10.63	10.55	10.43	10.39	10.14	10.31	10.28	10.98	10.28	10.12	10.64	10.27	9975	10.04	10.2	10.34	10.43	10.74	11.01	10.4	10.14	10.52	10.25	10.09	9979	10.31	10.28	10.08	10.35	10.22	10.46	10.44	10.4	10.88	10.41	10.48	11.17	10.36	10.14	10.28	10.37	10.16	9942	10.44	10.07
PLIN3	10.76	11.14	10.62	10.72	10.62	10.97	10.98	11.48	10.8	10.8	10.68	11.26	10.88	10.71	10.47	11.08	10.9	10.98	10.93	10.66	11.17	11.09	10.73	10.61	11.23	10.7	10.39	10.92	11.2	10.33	11.07	10.5	11.25	11.3	10.22	10.82	10.46	10.95	11.13	10.84	11.11	11.08	10.92	10.81	11.07	10.82	10.65	11.22	10.92
JAK2	9465	8562	9008	8.61	8139	8253	8186	8.17	9102	8.67	8899	7076	7658	8312	8613	8644	7876	7903	7193	9.3	7687	7464	6319	7983	7241	8233	7547	8691	8798	6697	8012	8542	7746	7.8	8757	8979	7484	6471	7867	8219	5951	7.76	8656	7851	8081	7966	8458	7787	8552
SRPX2	9139	8154	8986	6101	6013	6741	6629	6697	6695	7018	5846	5359	8435	5998	6754	6693	4777	6631	4609	8319	5376	6714	7382	6044	5338	5676	4185	5348	7246	8842	6.16	6574	6841	6589	5395	6966	5748	6895	5439	5.2	5239	5691	6338	6708	6.32	6563	6407	4371	7206
LPXN	8284	8359	7822	8271	8906	7339	7851	7916	7856	7773	7256	8217	7.58	7175	8457	7.52	6507	7.82	7379	7943	9205	9639	7987	8722	8311	8628	9015	9175	8.54	9274	8115	7466	7423	7086	7026	7905	8012	8811	7379	8641	7747	7498	7468	9036	8365	6893	7427	7346	7913
CTNND1	13.72	13.14	13.18	13.21	12.77	12.88	13.03	13.02	13.17	13.24	13.08	11.81	12.38	13.29	12.65	12.89	12.69	12.15	12.46	13.18	13.07	12.16	11.2	12.62	12.91	12.98	12.88	13.47	12.35	12.03	12.93	13.33	12.68	12.69	13.29	12.58	12.57	11.82	12.6	12.98	10.99	12.79	13.07	12.87	12.54	13.15	13.22	12.93	12.75
SNX2	10.45	10.16	10.49	10.53	9966	10.26	10.58	10.42	10.77	10.55	10.61	10.08	10.88	10.21	10.54	10.35	10.28	9697	10.02	10.67	10.51	10.59	9764	9997	10.19	10.21	10.27	10.62	11.01	10.53	10.61	10.42	10.46	10.24	10.9	10.89	9918	10.32	10.46	10.32	9286	10.43	10.68	10.22	10.36	10.48	10.77	10.26	10.73
CYTIP	7.33	6779	7927	7667	6397	6851	7046	8029	7682	7253	6888	5.87	6059	5963	5643	7481	6.04	8336	5495	7203	6525	8135	4344	6.51	5875	5817	5.87	6342	8015	7611	6797	7192	6074	5883	5728	7356	6219	7042	6036	6694	5608	6.54	5846	6862	8215	5.05	7285	5841	6923
USO1	11.16	10.82	10.88	11.16	10.91	10.96	10.8	11.08	11.25	11.15	11.46	10.34	11.25	11.4	11.11	10.98	11.14	10.14	10.65	11.15	11.16	10.43	9663	10.78	10.71	10.7	10.7	11.36	11.35	10.72	11.26	11.25	11.11	11	11.68	11.27	10.25	9963	11.24	11.06	9.68	11.24	11.22	11.05	10.94	11.43	11.62	11	11.45
SRGAP2	9086	8889	9292	8973	8476	9238	9059	9515	9036	8779	8802	8307	9726	8682	8592	8721	8091	9027	8262	9242	8232	8788	8175	8356	8112	8755	10.42	8.24	8.08	9359	8556	9672	9.01	8085	9811	8.65	8998	8791	8938	8658	8212	8316	8.57	8764	8851	9799	8611	8779	8392
PLXNA2	11.08	10.08	10.69	10.12	9333	9656	9795	9009	9889	10.23	9.87	8668	9493	9723	10.48	9646	9254	9382	8508	10.23	9473	8751	8.74	9455	8.62	9758	9415	9.26	8449	7768	9151	9484	8769	9071	9.49	9959	9729	8437	8602	9626	8214	9075	8717	9114	8508	8699	8661	9454	8955
ADAM23	2759	1806	5699	3.16	2669	3901	3742	3501	4585	3974	5439	2939	4353	4246	5798	4371	2255	2949	2688	5411	4005	3467	1653	4282	3408	3306	4074	3533	4446	6778	2454	3.3	4104	2698	4138	6.14	3093	2984	2467	4.45	0	3425	2971	4324	3711	3946	3.25	2798	3826
ADAM11	4319	4658	5575	5122	5.59	5317	5005	4278	4902	5686	5073	6403	4524	5146	6307	5303	5128	4492	4.16	4718	5861	6203	6678	5816	4338	5721	5.05	4292	4917	4331	5144	5033	5156	4593	5096	5512	6422	6869	5202	5617	6998	4964	4807	5422	5563	4887	4.45	4832	5058
FZD7	8996	7641	10.1	10.41	10.41	10.62	10.44	8672	9823	10.35	10.77	8995	9.09	10.08	11.47	10.37	8788	9675	8998	10.8	9967	9.41	9426	11	9.45	10.39	8407	9386	9368	9874	9231	9615	9955	9441	9584	10.79	9739	8606	9129	10.23	8105	9427	9378	9836	9019	9497	9305	9666	9652
ROCK2	10.41	8756	10.5	9853	8594	10.24	9946	9.49	10.56	9691	10.81	6497	9337	10.43	10.37	9781	9123	7323	7606	10.9	9419	7436	5868	8463	8577	9199	8699	10.26	9799	7399	9477	10.41	9252	9.09	10.34	10.59	7682	6154	9326	9747	4935	9071	9808	9205	8901	10.38	10.33	9949	10.09
CLASP2	10.1	9505	9904	9.93	9537	9867	9973	9999	10.27	10.09	10.38	8944	9993	10.34	9871	9629	9973	9.78	9326	10.27	9807	9148	8843	9492	9396	9773	10.23	10.28	10.3	9581	9801	10.49	9881	9.7	10.2	10.39	9312	8586	9792	9919	8839	9625	10.11	9734	10.04	10.12	10.34	9756	10.23
CPNE3	11.69	11.54	11.33	11.89	11.48	11.48	11.63	11.38	12.24	11.83	11.85	10.65	11.29	11.67	11.1	11.61	11.93	11.01	11.92	11.74	11.56	10.82	10.25	11.29	11.95	11.31	11.34	12.17	12.4	11.34	11.36	11.86	11.91	11.81	11.32	11.73	11.68	10.54	11.73	11.83	10.4	11.67	12.11	11.59	11.32	12.81	12.25	11.64	12.3
ICOSLG	8355	8799	8739	8913	7664	8169	8551	9083	8017	8306	7734	7677	9036	8094	7442	9.15	8464	10.2	8145	8877	7821	8597	8401	7.71	7492	8294	8.33	7.84	8224	8064	7263	8334	8522	8091	7667	7965	8171	8552	9261	8673	8434	7971	7883	8.51	9098	7503	7791	8977	7721
SOCS5	9249	8573	9166	9369	8682	9065	9316	9442	9676	9219	9543	8302	9144	9265	9344	9172	8502	8939	8606	9729	9055	8.69	8135	8631	8887	9278	9289	9419	9394	9278	8557	9776	8802	9137	9.93	9677	8094	7616	8977	9135	7477	8887	8838	9305	8775	9445	9529	9109	9284
NPHP4	7864	7195	8.27	7682	7338	7839	7454	7368	7511	7933	7676	6914	8061	8323	7402	7388	7642	6.12	7139	7995	7407	7.76	7266	6918	6983	6958	8372	7241	6752	8029	7741	8368	7733	6745	7917	7593	7209	7608	8028	8401	7.49	7999	7639	7565	7777	7568	7673	7747	7193
DNAJB6	10.35	10.45	10.39	10.26	10.57	10.21	10.35	10.12	10.15	10.2	10.17	10.09	9.99	10.29	10.96	10.46	9801	10.29	10.07	10.25	10.29	10.3	10.08	10.8	10.07	10.73	9.88	10	10.28	10.95	9964	9915	10.11	10.28	10.99	10.61	10.05	10.22	10.08	10.21	9114	9934	9.82	10.23	9964	9981	9715	9974	10.21
CDH16	0	1279	0	0.7574	0	0	0	0	0.9143	0.3262	0.5276	0	0	1.35	0.5568	0	0	0	1063	3737	0	0	2.67	0.5052	1008	2445	0	0	1138	0	0	0	0	1361	6862	0	0	0	0	0	1985	0	0	0	0	0	0	0	1213
LRRN2	5103	4658	5081	5246	5622	5301	5586	5038	5138	5998	5.2	4967	4274	6272	6622	5843	4168	3.25	4326	5377	5.08	6077	5.8	5959	4874	5838	6879	4682	4644	9271	4372	4.95	5874	4869	5667	5885	5201	5236	4898	4964	4383	6082	5369	6687	5531	5019	5249	4711	4233
SEMA7A	8222	6253	7296	6515	4368	5568	5212	5912	5.59	5783	5657	4764	5952	5836	5938	6493	5969	6744	5477	6496	5.25	6499	5492	5816	4408	5358	4719	4609	6.97	5569	5358	5378	5775	3955	7588	6691	5722	6227	5779	6.37	4955	5548	4.88	5879	6794	5688	5281	5534	5792
PPFIA2	5.22	3863	7288	5359	4778	3477	7988	3182	5788	4.19	5694	1.61	10.03	4543	6065	3895	2985	3.03	1668	5853	3697	6235	4183	5519	3923	4812	2343	5193	4365	8308	5305	11	4.33	5621	4812	4841	1528	2067	3598	6883	0	2554	3978	7603	2763	2788	3184	3135	5984
AVIL	4879	4849	5838	5476	4317	2875	3446	5077	4567	5343	3161	4.08	3936	4986	4961	2195	4218	3.18	4115	4486	5144	4937	4382	2.69	3102	4487	2685	4868	4186	4957	5016	4271	3698	2782	4.92	5875	6002	3078	4346	5848	1985	3772	3766	3678	4625	3679	2884	4306	4377
FLNB	13.86	13.98	14.11	13.77	13.84	13.82	14.34	13.81	14.29	13.83	13.68	13.94	14.09	14.18	13.47	13.07	14.17	12.96	13.56	13.83	14.14	13.64	13.6	13.55	13.96	13.35	13.93	14.54	13.13	12	14.13	14.99	13.95	13.95	13.63	13.03	13.49	13.05	13.22	13.82	13.81	14.39	14.21	13.72	13.77	13.62	14.01	14.06	13.91
TECTA	4022	2959	4425	4135	3755	4091	3779	3611	4.13	5087	3961	2616	4656	4672	4377	3378	3829	2863	2913	4587	4.23	3.85	1881	3807	3337	3801	5.03	4.96	3406	3438	4309	5234	4157	3534	4.62	4403	3381	2239	3693	4137	3304	4518	4378	4268	4317	4332	4.45	3926	4207
GPC4	7799	6852	8644	8856	9094	9.49	9315	8123	8786	8724	9.06	8.02	7616	8797	9568	9938	8399	7431	10.79	9257	8544	8446	8607	9413	8602	9513	8603	8229	8208	8029	7345	9183	9206	8467	9.28	9.41	8532	8.04	9097	8981	7456	9209	8845	8953	8123	11.13	9918	8637	8466
CLDN11	7377	7854	9157	8759	7273	8989	8984	8937	7908	8842	8488	7368	7.53	7817	8267	8608	6843	8116	6.89	8566	7218	7749	7.22	8.68	7302	8156	5474	7768	7821	10.08	6865	7493	7128	8036	7933	9372	8332	7.45	6846	8236	6868	7872	7318	8237	8.01	6993	7473	7982	8048
TNFRSF21	13.42	12.25	12.47	12.54	11.61	11.05	11.54	11.51	10.93	11.62	10.86	9529	13.04	10.74	10.96	12.3	10.59	11.2	11.31	12.18	9813	11.02	9901	10.63	11.15	11.89	11.21	9845	11.04	10.17	10.6	11.36	10.32	11.39	7.87	11.17	10.39	10.06	11.03	11.64	9988	9983	10.4	11.28	10.78	10.36	10.84	11.45	10.74
DAB1	4838	2667	3793	3671	5294	4.83	6007	2.95	5089	5583	6346	2028	7643	4524	6544	4547	2866	0	1668	6459	4867	1694	2404	4117	2822	5641	3622	4062	4644	1066	4047	4702	4234	3207	6429	6594	0.9574	1376	3141	4683	0	3823	3687	2973	3235	3854	5312	2.89	5.33
ITGA10	6302	4462	6.39	4711	4.64	3773	3134	5355	4944	5405	4383	4.08	5291	4097	4917	3607	4266	5787	4069	5272	5656	5286	4.77	4082	2822	3246	6632	3318	4446	6511	4123	4633	4306	3.76	2917	3.89	4502	4544	4588	4392	4019	4636	4587	4.48	4929	6713	4775	4551	4939
LRP6	9863	9242	10.16	9874	9321	9954	9996	9941	10.44	9965	10.5	8678	10.45	10.43	9568	9813	9162	9661	9.48	10.73	9555	8947	9093	9515	9.69	9538	11.33	10.3	10	9715	9759	11.15	9666	9271	9749	10.12	8806	8355	9464	9784	8058	9904	9669	9929	9.69	10.52	10.68	10.02	9953
GRAP2	4899	5017	5997	6.22	6823	5476	4.89	5602	5276	5701	4804	5145	4592	5041	5516	5034	4674	4521	4022	5893	6108	5497	4306	5306	5166	4635	3865	4884	6133	3438	4847	5.49	5156	5181	5774	5562	5004	6.11	5119	5859	4468	4.39	4982	5343	6339	4031	4883	5841	5388
BCAR3	10.28	9615	8829	9431	9506	8676	9521	8645	8977	8914	8.91	9486	8432	8577	9636	9353	8163	8346	7833	9028	9582	8.57	8774	8992	8276	9673	6971	9023	8464	7651	9351	8578	8567	9.28	9689	8581	8911	8439	8604	8703	8772	8094	8.43	8699	8273	8.09	8651	9305	8708
CIB2	8028	8702	7913	8252	8593	8848	8064	8582	8038	7909	8055	9852	5573	7.92	7791	8491	7142	6311	7661	7429	7941	9.91	9265	8204	8219	9001	7917	8744	8965	5784	7771	7.98	8049	9063	7704	8771	8195	8637	7287	7483	8546	7.67	7.92	8.16	7248	8628	6781	7642	8585
CEACAM4	2844	2191	1947	2983	0.7778	0.8833	2.29	2456	2439	1473	0.913	2028	1303	1.35	1746	1.48	0	3896	0.627	3025	1551	4362	1653	2592	1819	0.8548	2208	0.972	1765	3019	1481	1501	2083	0	0	2948	2925	2393	1612	1434	0.8839	1781	1057	2746	2971	1408	1992	2072	1213
IDH1	12.57	13.14	12.54	11.82	13.28	12.86	13.02	12.91	13.14	12.76	13.56	13.09	12.28	12.96	12.57	12.53	13.27	13.43	13.29	12.37	13.69	12.88	12.44	13.21	13.24	12.84	13.64	13.82	13.2	11.17	12.97	13.12	13.18	13.35	12.66	12.46	12.25	12.34	13.56	12.17	12.39	13.06	13.24	12.87	13.43	12.35	13.95	13.66	13.82
PAK3	4.46	1279	3742	4551	2585	4787	3.58	2674	5051	4879	6023	0	3059	4504	4672	4058	3095	4021	0.627	5924	3.78	0	2077	3623	2335	3118	1491	3822	4336	1066	2739	4402	2964	2608	6323	5785	1936	1376	2355	3643	0	2292	2411	2826	1.86	3806	4.45	3881	4181
DYSF	8646	6.05	9239	8.44	8537	9112	8336	7.73	8332	8919	9662	7861	8883	8984	10.89	8946	7489	7.31	7017	9.01	9007	8.46	7978	9.64	7488	8668	7805	7436	7625	10.29	7088	9217	8718	8546	9429	9837	7565	8004	7418	8463	8107	8594	8269	9085	7989	8413	8476	8277	7761
TSPAN9	10.82	11.52	11.33	11.32	10.92	11.49	11.37	10.81	11.56	11.01	10.77	11.57	11.19	11.5	10.61	11.19	11.15	11	11.12	11.18	11.38	11.38	11.85	11.17	11.32	11.03	11.18	10.92	10.93	11.13	11.53	11.21	11.33	11.41	11.39	10.85	10.63	11.56	10.92	11.19	12.07	11.18	11.17	11.59	11.17	10.91	10.98	11.69	11.3
FLOT1	11.69	11.9	11.39	11.79	12.23	11.67	11.73	12.5	11.35	11.6	11.49	12.56	11.8	11.16	12.09	11.99	11.39	12.38	12.16	11.56	12.04	12.6	12.76	12.45	12.17	12.25	11.97	11.42	11.64	12.39	11.73	11.41	11.97	11.82	11.85	11.93	12.18	12.77	11.91	11.78	12.51	11.73	11.92	11.97	11.77	11.82	11.12	11.72	11.55
MPDZ	10.22	8892	10.19	9.99	9.54	10.22	9997	9662	10.38	10.15	11.01	8447	9826	10.3	10.29	9675	9634	8381	8536	10.53	9984	8.95	7937	9638	9134	9606	10.02	10.25	9664	9377	9652	10.8	9631	9407	10.03	10.96	8679	7437	9516	9.97	7.73	9.91	9959	9969	9124	10.48	10.33	9793	9902
SASH3	6588	7319	7426	8176	6633	6877	6587	7565	7527	7243	6915	6695	6113	6766	6105	6748	5.91	7416	5915	8161	6647	7888	7134	5978	6136	6866	5789	6509	8726	6834	7165	7.21	6849	5.93	5203	8171	7721	8732	5893	7617	7333	6724	6633	7722	8996	6148	6518	7292	7484
RSL1D1	11.97	11.87	11.07	12.09	11.78	11.75	11.81	12.22	11.63	11.78	11.45	11.73	11.91	11.6	11.59	11.97	11.67	11.74	11.97	11.57	11.68	12.21	12.19	11.63	11.93	12.24	12.27	11.73	11.9	12.11	11.45	12.33	11.81	11.95	11.54	12	12.09	12.2	12.18	11.91	11.89	11.61	11.49	12.2	11.83	12.46	11.9	11.59	11.52
ANXA9	7153	6793	7149	6027	6068	5656	7129	4803	5826	6082	5317	5284	6002	6087	6255	4953	4064	1883	4245	7002	5972	5038	6484	5.11	5409	7446	4562	5404	5591	4209	5924	5149	4441	5873	10.79	5.5	5375	5562	5832	6377	4.44	5917	5343	4686	5375	5535	5387	5.18	6465
PDE5A	10.37	8233	11.23	10.6	10.84	11.45	10.91	9821	11.29	11.13	11.83	9747	8.9	11.05	11.53	11.09	8988	10.31	9322	11.69	10.24	9472	9505	11.22	9714	11.17	8606	10.29	11.01	10.35	9226	11.01	10.72	11.19	10.93	12.42	9826	9146	10.17	11.1	8662	10.19	10.17	10.57	9384	11.27	10.88	10.61	10.38
ECM2	7098	4813	8326	7442	6932	7866	8081	8.08	8562	7683	8851	6176	8773	8161	8361	8731	6613	7663	6331	9321	6712	7918	6.6	8143	6468	7611	6267	7304	8.75	8804	6965	7.65	8198	6928	7538	9199	6454	6418	7143	7726	5449	7351	7887	8045	7702	7.79	8171	6554	7903
CNTN5	0	0	0	0	1051	0.5082	0.7716	1697	0.9143	1182	0.5276	0	2855	0.6959	2253	0	0.7039	0	0	0.9808	0.8255	1694	1653	0.8786	1008	1146	0	1548	0.4854	1.4	1134	0.6874	1389	0	1857	0.8401	0	0	0.4973	0.8884	0	0.5725	1057	1538	1037	2025	0.5116	0	0
STK10	9201	8.63	9228	9014	7805	8686	8445	9135	8.72	8544	8851	7867	8712	8525	8772	8622	7669	8427	7506	9328	8.2	9046	8231	7988	7548	8.54	7648	7979	8499	8.27	8442	8551	8394	7634	8094	9194	8461	9171	7.63	8713	8498	8289	8086	8589	9145	7809	8351	8432	8278
NFASC	8123	6466	10.33	8242	7.22	9966	9147	8294	8926	9236	9574	7107	8699	9426	9932	8977	6903	7994	6918	9955	8922	7959	8274	9385	6831	9067	6917	8516	8252	9806	8626	9313	8831	7242	8788	9778	8691	7666	7846	9.7	7168	8106	8622	8645	8.08	9498	9.14	7594	9004
SORBS2	10.23	10.09	11.49	11.26	10.55	11.78	11.55	10.24	10.97	11.3	11.13	10.55	10.81	11.1	11.64	10.85	10.71	10.16	10.54	11.37	10.53	10.56	9515	10.77	10.59	11.3	11.42	10.91	11.07	10.93	10.23	11.71	10.58	11.11	11.45	11.43	10.63	9813	10.88	11.27	9756	10.4	10.85	10.91	10.42	10.98	11.44	11.18	11.14
FARP2	9207	8839	9149	8607	9122	8335	8646	8.52	8604	8583	8483	8801	8888	8754	8708	8241	8643	8546	9028	8631	9095	8942	8807	8525	8441	8658	9097	9094	8224	7724	9265	9381	8448	8444	9351	8472	8394	8759	8785	8967	8823	8752	8502	8513	8622	8.71	8609	8546	8643
NFAT5	11.75	10.87	11.59	11.31	10.92	10.63	10.75	10.77	11.11	11.1	11.2	9539	10.14	11.12	10.47	10.59	9867	11.08	10.34	11.56	10.35	9844	9539	10.66	10.25	10.92	10.15	11.28	10.39	10.68	10.3	11.25	9933	10.13	11.09	10.88	10.1	9097	9851	11.05	8943	10.28	10.12	10.63	10.19	10.42	11.13	10.83	10.37
SLITRK3	1614	1279	3026	5552	7741	4742	4667	2.05	3.95	4.65	5317	5751	1303	4837	7794	1695	2985	0	0.627	4355	6108	2838	5308	6536	5302	7017	1237	4.93	4419	2565	1883	4633	4.42	5016	7928	2948	3621	1871	3945	3541	3033	3772	2411	4958	2055	5338	5402	4551	4.1
UBOX5	8561	8497	8806	8642	8621	8748	8676	8393	8593	8411	8504	9278	8.14	8772	8953	8256	8946	8838	8.33	8703	8.53	8792	9745	8643	8626	8663	8469	8.65	8267	8612	8475	8742	8599	8555	8489	8592	8988	9071	8163	8381	9785	8517	8485	8504	8534	8589	8201	8678	8535
CLSTN1	13.05	13.78	13.23	13.35	13.43	13.66	13.62	13.02	13.25	13.28	13.28	13.54	13.4	13.56	13.13	13.37	13.74	12.54	13.4	13.09	13.56	13.2	13.33	13.25	13.27	13.52	13.55	13.38	12.54	12.47	13.09	13.46	13.42	13.68	12.9	12.89	13.02	12.92	13.02	13.14	13.65	13.58	13.06	13.44	13.33	13.46	13.64	13.68	12.81
CCNB2	4.46	5577	4181	5722	5965	5138	5239	6613	5025	5583	5889	5709	6557	5634	4377	6521	6556	6082	5979	5877	5553	6667	5868	4732	6255	4407	6.8	5959	6133	8537	6423	6532	6435	6231	3347	5.34	7406	6795	7397	5654	6.17	7055	6461	6372	6026	5925	6652	5683	5.27
S1PR2	7.17	7.54	8127	8181	7463	7993	7598	7629	7284	7667	8181	7227	7928	7615	8017	8.52	7103	9473	7041	8241	6318	8076	8251	8188	7361	7829	7138	6602	7242	7772	6766	7451	7785	7266	7391	8454	7695	7806	6766	8051	7833	7012	6896	7518	7474	6742	7036	7398	7167
CSPG5	4161	5356	4839	4485	4815	5715	5847	5038	5.15	4775	5731	5166	8554	4972	4276	5202	6536	4242	5495	4378	4618	5461	4853	4982	5745	4588	5679	5579	4336	5617	5358	5.45	5.43	5398	2.74	4.88	6869	4332	5943	4102	5.75	7505	6.7	5773	6311	3923	5312	4736	4628
PCDH8	5992	6517	5061	8835	7073	5848	7031	8387	8173	8136	6385	8443	4815	5462	8153	6081	5627	3555	6787	8524	8565	6481	6166	6918	8396	7672	5444	6612	3945	3762	7543	7106	6115	5763	0.523	5.34	8472	6829	8353	9013	3033	6.69	4.77	8791	5595	3854	5783	7227	4809
EPN2	10.47	10.26	10.64	10.31	10.65	10.56	10.47	10.09	10.55	10.66	10.62	10.27	9998	10.48	10.93	10.16	10.79	10.76	9886	10.59	10.62	10.09	10.56	10.78	10.11	10.44	9835	10.33	10.12	10.05	10.46	10.58	10.08	10.25	10.49	10.32	10.28	10.03	10.23	10.57	10.6	10.35	10.35	10.14	10.43	10.2	10.2	10.35	10.43
RASGRP1	5973	5681	6039	6568	4343	5317	4837	6329	5765	5591	4734	3426	5304	4899	3675	5073	4218	5799	4.16	6542	4942	5156	3678	4185	4508	4611	4.59	5393	6966	3874	5056	5656	5269	4705	5.82	5.71	4961	5657	4375	5702	3584	5051	4692	5509	6.43	5942	5605	5067	5569
LYPD3	12.51	11.41	10.68	10.53	10.26	9743	9.82	8.65	9948	11.42	8955	9811	9208	9367	9824	9.63	9.79	8453	9222	9.33	8832	9375	9611	8929	9345	9886	8697	9191	10.04	7786	9554	8965	8761	9312	6046	9681	9754	9687	8282	8637	9307	8391	8752	9225	8591	8.68	8143	9286	9741
VAPB	9633	9719	9927	9878	9667	9952	9833	9747	10.11	9968	10.06	10.02	10.38	10.36	9827	9.62	10.06	9808	9879	10.04	9941	9.83	9643	9.63	10.04	9609	10.11	10.21	10.34	9903	10.01	10.24	10.1	9817	9985	10.04	10.01	9936	9879	9.84	9742	10.16	10.3	9.79	9804	10.16	10.34	10.05	10.28
MPZL1	11.03	11.43	11.08	11.59	11.44	11.49	11.33	11.69	11.3	11.07	11.22	10.94	11.31	11.6	10.99	11.63	11.5	11.32	11.46	11.17	11.34	11.39	11.11	11.31	11.82	11.44	11.97	11.9	11.43	11.41	11.75	11.3	11.47	11.67	10.96	11.38	11.17	11.87	11.61	11.45	11.36	11.59	11.71	11.79	11.57	11.68	12.04	11.9	11.45
LYPLA2	10.7	11.22	10.25	10.32	10.86	10.75	10.6	10.78	10.15	10.34	9969	11.3	10.46	10.29	9752	10.73	10.69	12	11.6	9837	10.54	11.29	11.82	10.58	11.16	10.88	11.22	10.04	10.24	11.31	10.98	10.36	10.81	11.19	10.05	10.17	11.01	11.63	10.54	10.67	12.29	10.88	10.2	10.97	10.88	10.3	10.35	10.79	10.23
BMP10	0	0	0.5619	0	0	0	0	0	0	0	0	0	0	0	0	0	0	0	0	0	0	0	0.6196	0	0	0	0	0	0	0	0	0	0	0	0	0.4804	0	0	0	0	0	0	0	0	0	0	0	0	0
SVIL	12.32	10.28	12.59	12.19	11.88	12.4	12.49	11.09	12.12	12.3	13.42	10.78	11.21	11.97	13.9	12.19	10.86	10.93	11.03	12.55	12.5	11.14	10.6	12.6	11.29	12.71	10.72	11.77	11.4	10.27	10.87	12.33	11.75	11.95	12.72	13.57	11.41	10.26	11.21	11.63	9948	11.41	11.68	11.94	10.72	11.97	11.51	12.08	11.67
BAG4	7867	7078	7059	7457	7155	7441	8037	6943	7984	7255	7919	5206	7379	7628	6886	7229	6269	5639	5.53	8079	7.43	6659	4523	6428	6948	7725	7066	8199	8266	5.5	6873	7871	6821	6942	8094	8064	5696	4813	6366	6998	3682	6979	6951	7548	6985	7339	7856	7098	7928
AHSA1	11.04	11.65	10.25	10.49	11.31	10.71	10.83	12.02	10.74	10.6	10.63	11.35	11.21	10.83	11.03	11.31	11.13	11.46	11.61	10.51	11.21	11.17	11.3	11.61	11.21	11.26	10.91	10.52	10.81	10.93	11.15	10.3	11.12	11.25	10.75	10.84	11.54	11.51	11.53	11.21	11.28	10.99	11.28	11.13	11.06	10.49	10.88	10.63	10.88
CLDN7	11.69	11.55	10.83	10.79	11.88	10.72	11.23	11.47	10.28	11.21	9513	11.62	9455	10.17	11.03	11.06	12.13	11.47	11.26	10.46	10.84	10.52	12.12	11.38	11.49	11.29	11.87	10.9	11	9384	10.78	10.66	11.48	10.92	11.61	9903	11.08	10.45	11.74	11.44	12.68	12.18	11.77	10.69	11.83	10.79	8493	10.81	11.03
CLDN9	3445	4508	4103	4218	4441	3174	4018	1697	3384	2826	2314	2616	3122	2718	2628	4519	3198	2673	4.16	4.77	2281	3467	6007	2489	4016	4659	2208	2538	4186	5798	3.18	3428	1969	2179	2302	3544	4724	3941	1795	3593	4162	2292	2084	3041	2055	3212	0.8885	3278	3648
VNN1	2844	3504	5102	6206	2302	3582	4251	4803	5126	3634	4078	2732	3293	2718	2628	4752	3468	5016	3433	4465	3739	4827	3261	3671	2822	2645	5302	2826	5492	4209	3939	3851	4375	2608	3217	5192	3826	4332	5067	4.27	3584	4456	3157	4975	4771	3625	4634	5875	4792
CLDN14	1405	1946	1538	2038	3088	2698	1642	1884	2273	2265	0.913	2352	0	3023	2389	0.5336	1.53	0	2266	2086	1551	2122	0.6196	2489	1596	1388	0	0.4011	4217	2565	2454	0.9377	0.9793	2179	0	0.4804	2513	1045	0.8664	1829	3241	1972	0	1099	1.86	0.7728	0.5116	1247	2489
NTN1	8655	8882	9.86	9747	8.16	9405	9468	7463	9383	9903	8914	9049	7432	8967	9089	7.47	8257	5353	7493	9994	8611	8662	8276	8772	8628	8673	7708	8392	8.35	6286	9087	8.77	7796	8913	6112	8624	8977	8004	7518	9236	7756	8.02	8.03	8873	7995	7309	8313	9673	8526
FSTL3	8587	8122	10.21	8076	8333	9632	9465	9457	9071	8531	9583	9155	9644	8625	10.29	10.48	8299	11.23	8634	9821	8373	10.18	10.61	9729	8.46	9.35	8229	7549	8491	10.47	9449	8302	8.97	8021	8345	9709	9138	10	8795	9809	10.12	8521	8646	8268	8.77	8329	7476	7913	9357
CRTAM	3499	3714	4.74	4394	2302	2789	3.35	4657	4004	3148	3088	1.61	3398	3023	2833	4627	2985	5036	2093	3467	2032	4678	2995	3164	2335	2445	2343	2689	4954	3285	3.03	3.62	3422	2512	1208	5354	2734	3249	2757	3114	3584	2775	2084	4.21	4198	1749	3184	2798	3722
BAG3	12.88	14.35	11.22	11.12	11.76	11.18	11.23	11.95	10.44	11.89	11.1	10.46	10.75	10.87	11.45	12.36	11.92	11.73	11.29	10.87	11.47	11.37	9977	11.75	11.01	11.73	10.2	10.49	10.41	9491	10.51	10.2	11.02	10.92	10.29	11	11.21	10.37	11.87	11.19	9575	10.34	10.67	10.76	10.64	10.45	10.09	10.72	10.44
MAP4K4	10.47	9942	10.52	9968	9824	10.21	10.23	10.88	10.44	10.21	10.6	9637	11.3	11.12	10.07	10.27	10.47	10.91	10.32	10.65	10.09	10.25	9901	10.26	10.19	9688	10.89	10.63	10.08	11.42	10.3	11.13	10.57	9885	9782	10.6	10.16	10.33	10.34	10.49	9772	10.84	10.71	10.77	10.37	10.55	10.68	9.8	10.18
CLDN1	11.47	11.84	10.69	12.95	10.91	11.27	10.53	11.25	10.64	11.78	8625	9879	9358	9955	10.5	11.07	11.4	9054	10.52	11.54	10.28	10.2	9896	10.04	10.1	11.31	9595	10.53	10.06	8537	10.13	9736	9603	9934	12.83	10.37	11.73	10.06	10.91	10.79	9067	8694	9735	10.9	9574	8018	9914	10.95	9951
ONECUT2	5668	4151	5964	3.16	5752	4934	4924	7356	3501	4.02	5973	2732	9783	7752	3315	5.53	5493	7038	7606	3467	3413	5.6	6449	6.6	8554	3184	11.27	7049	6641	8247	5.42	9408	6046	4.47	0.523	1753	6.39	6277	5102	7273	6101	5211	5489	6881	7089	5149	6484	4877	4.1
ITGBL1	4753	2495	7916	4218	2669	6566	6261	7819	6.43	5119	5217	3619	7826	6976	6065	5367	5.59	5652	6497	7809	5634	8553	6219	6414	7151	6735	6317	5608	7.14	10.56	5719	6874	8.47	3324	4646	6.54	6573	8197	6744	5327	5.05	7127	7573	6219	8235	8722	6551	5.83	6336
CD160	4226	5224	4291	4463	3901	2385	3703	4244	4512	3446	2.93	3426	2528	3902	2833	2.33	2866	4276	2266	3902	2919	4151	4741	3354	3659	4102	2875	3222	3907	3113	3852	3508	2902	4126	3773	4348	4377	4213	3072	3184	4.44	3358	2506	3878	3314	2685	2611	3528	4072
FAM107A	11.48	9918	11.14	10.34	10.55	11.27	11.35	9092	11.03	10.39	11.92	10.41	10.3	10.26	10.88	11.65	10.35	11.1	9264	10.95	9432	11.72	9.42	11.46	9571	9508	8936	8585	10.34	8967	10.23	9767	9778	10.78	12.05	11.62	8908	8.96	9692	10.35	9301	9637	8944	10.67	9892	8722	9935	9674	10.64
AGR2	13.38	14.11	12.92	11.4	13.97	12.7	13.1	12.41	11.43	12.28	12.42	13.58	12.94	10.51	13.13	12.42	12.69	10.58	13.15	12.03	13.63	13.51	13.94	13.98	13.49	13.31	13.03	13.69	13.17	9895	12.87	12.4	12.79	12.19	13.59	10.9	11.17	13.1	13.18	12.58	13.97	12.93	10.51	13.46	12.51	12.24	13.99	12.61	13.2
BCL10	10.62	10.36	9.58	9825	9129	9468	8.5	8854	8648	10.18	8651	8202	8833	8735	8656	9153	9608	9001	8.66	9125	8351	8636	8457	8093	8569	8634	8753	8437	9432	8397	8404	8434	8583	8598	8471	8.79	8373	7718	9291	8736	7808	8282	8565	8642	8589	8102	9031	8655	8266
PAK4	11.01	11.98	11.47	10.66	11.86	11.84	11.78	11.2	11.18	10.94	11.26	11.53	11.54	11.65	11.11	11.55	11.66	11.7	12.02	10.92	11.88	11.6	11.59	12.02	11.76	11.68	11.42	11.91	11.1	10.93	11.74	11.33	11.73	11.52	10.97	10.84	11.57	11.11	11.23	11.51	11.39	11.48	11.56	11.59	11.62	11.21	11.3	11.79	11.55
LDHA	12.19	12.03	11.62	12.67	12.58	11.85	12.07	13.57	11.84	12.73	12.36	11.95	12.57	12.27	12.78	13.09	12.86	12.75	13.11	12.09	12.71	13.16	12.06	12.78	12.92	12.39	13.31	12.3	12.34	12.86	12.07	12.17	12.77	12.43	11.84	12.65	12.2	12.27	13.51	12.8	11.92	12.68	12.57	13	12.27	12.15	12.57	11.85	12.45
PNP	10.68	9051	8898	8431	8711	8259	8113	9654	8187	9826	9039	8637	9499	8327	8946	9653	9703	9.85	9343	8522	8466	9752	9034	8014	8719	8323	8153	7872	9.48	8492	9.13	8.04	9109	7919	11.73	8918	9162	9805	9874	9113	8797	8962	8075	8729	8563	9158	8349	8434	9.17
ABL1	11.09	10.77	11.67	11.22	11	11.51	11.33	11.54	11.33	11.48	11.58	10.29	11.45	11.68	11.97	11.56	11.58	11.64	11.14	11.54	11.39	10.85	10.03	11.66	11.26	11.48	11.93	11.3	10.86	10.91	11.35	12.03	11.41	11.15	11.28	11.42	10.98	10.42	11.15	11.47	9973	11.6	11.57	11.74	11.16	11.71	11.44	11.48	11.11
EGFR	11.23	10.11	10.96	11.16	9.28	10.8	10.9	9976	11.18	11.18	10.89	7738	9604	11.6	9962	10.5	9.93	6838	8136	11.34	10.12	8202	7493	8728	9071	9671	9271	11.01	9912	8.45	10.17	11.06	10.12	9202	10.38	10.68	9302	8271	9442	10.54	6708	10.52	11.13	10.05	9.12	11.01	10.75	10.77	10.35
PLG	0	0.7768	0	0.4278	0	0	1043	0.9239	0.9143	1923	0	1019	0	0	0	0	0	0	1397	0.4054	3305	1421	0	0	0	0	0	0.7146	0.848	0	2099	0.3843	0	1122	0	0	0.9574	0	0.8664	1645	0	0	1287	0	1037	0	0.8885	0	1863
PLAU	9571	9408	9232	9569	8947	8334	8142	8743	8728	9564	7794	8156	7.54	8288	9189	8878	9198	8383	8614	9412	8192	9084	8891	8419	8767	9811	6929	8166	9494	8305	8.61	7698	8524	8416	8645	8979	9694	9116	8963	8886	8123	7574	7736	8892	8379	6865	7126	8584	8828
ADA	5597	5.71	5789	6266	5546	5.42	5083	5901	5309	5969	6013	5166	6106	5208	5.67	6365	4674	6625	4703	5761	5322	6901	6319	6184	4571	5927	5503	4315	5921	6375	5056	5186	5.43	5286	5938	7011	6002	6927	5249	5911	5544	5249	4915	5711	6072	4132	4363	5.18	5628
ASS1	12.73	13.22	12.52	12.39	12.48	11.28	12.49	11.5	11.8	12.19	10.95	11.78	11.59	10.24	11.75	11.97	10.15	10.85	11.59	12.24	10.73	11.88	12.4	11.23	11.23	12.71	10.2	11.06	12.04	9304	11.02	10.64	10.81	11.92	13.19	11.23	12.48	12.09	9939	12.13	11.46	10.29	10.26	11.32	11.17	10.25	9584	11.82	11.76
CSTA	8956	9319	7678	8753	9073	7519	7031	6734	8054	8	7.94	9195	7.36	6415	8025	6965	6382	6701	7417	7222	7474	9088	8156	8615	7468	8667	5286	7915	8395	5191	8314	6633	6482	7659	7806	7511	10.99	8343	6457	7416	6842	5649	7118	8361	6827	4741	5.76	7.98	7518
KNG1	0	0	0	0	0	0	0	2198	0	0.5922	0	0	0	1516	0	0	0	1883	0	0	1889	5.11	0	0	0.5906	0	0.5385	0	0	0	0	0	0.7205	0	0	0	0.9574	3.89	2467	0.5115	0	0.5725	0.7824	0	0	0	0	0	0
KRAS	9834	9554	9939	9876	9744	9492	9812	9976	9934	9747	9793	8613	10.11	9797	9704	9621	9.21	9572	9328	9916	9443	8927	8694	9424	9429	9627	9536	10.84	10.01	9785	9251	9791	9.51	9533	9518	9602	8897	8362	9529	10.13	8276	9365	9585	9639	9729	9632	9971	9513	9781
TGFB1	9.63	9466	10.59	9.56	8.93	9669	9499	10.12	9104	9334	9469	9693	10.78	9168	10.11	10.43	8999	9507	8734	10.15	8924	10.74	9727	9699	9167	10.26	8579	8462	9354	11.17	8869	8909	9969	8187	10.05	10.1	9769	10.36	8974	9639	9314	9676	9366	9571	10.14	8505	8666	8705	9103
GNRH1	4128	3675	5141	4987	4533	3.24	3246	4936	3342	5269	1468	5303	3495	2784	4.41	2566	3383	4706	3922	3805	5576	4988	5098	3.97	3337	3473	3193	4.09	2632	5169	4352	3508	2289	1905	2998	3217	5.5	4511	4317	4841	5156	4322	4353	2826	5159	2393	2884	3.69	3826
IGF2	9353	9.1	10.74	8.08	10.4	8244	8773	7.89	9121	9143	10.57	8106	9.78	10.02	11.07	11.91	6536	11.62	7669	10.96	7962	9143	9.01	10.37	8575	9667	6401	7897	9248	10.69	8544	7776	9097	8118	10.34	11.5	8302	8635	8.14	9692	7576	9071	7679	8.61	8876	8653	7992	7102	8917
TNF	3073	2959	6.07	5165	4291	3728	1642	1.23	1982	5278	2.18	1344	1835	2909	3874	3315	4009	1696	1896	3871	1551	2122	3414	2255	1819	2214	2685	0.972	4419	1.4	1995	2019	3769	0.8351	3576	4137	3826	3166	2234	2139	4383	1781	1057	2573	4113	1847	1187	4964	1726
IFNA2	0.4978	0	0	0	0	0	0	0	0	0	0	0	0	0	0	0	0	0	0	0	0	0	0	0	0	0	0	0	0	0	0	0	0	0	0	0	0	0	0	0	0	0	0	0	0	0	0	0	0
IFNB1	0	0	0	0	0	0	0.4368	0.5347	0	0	0	0	0	0	0	0	0	0	0	0	0	0	0.6196	0	0	0	0	0	0	1066	0.3771	0	0	0	0	0	0	0.6151	0	0	0	0	0	0	0	0	0	0	0
IFNG	3331	3966	0.9652	1447	2302	0.8833	1642	2569	1982	2187	0.5276	0	0	1163	0.5568	1228	3383	0	0	1391	0	1421	2.25	0.8786	0	1146	0	1.38	2433	0.629	0.6757	1501	2083	1361	0	3217	1528	1645	0.4973	1645	0	0.5725	0.4436	2146	2381	0	0	1247	0.7306
IL1B	7.78	7446	9.41	8922	6005	7155	5865	4.55	5668	9272	5857	3619	5291	6.99	4847	5.53	6184	4976	4641	7.73	2843	5787	5542	3891	5758	5177	3909	3364	8494	1066	6111	4752	7396	3918	4961	7775	7054	4993	4563	6019	5693	2967	3727	5851	5.93	3.51	3042	5746	5.1
EPO	3499	4952	3329	1911	5443	4.26	1937	2.05	1.87	3412	4078	5907	0.4508	1163	4724	3937	4266	0	3108	2471	4.64	4239	6678	6184	4771	5858	0.9298	4.82	3293	1.4	4817	2829	3332	5985	1458	1368	4502	2239	1956	2506	3033	1781	2832	3635	2381	2107	1992	2594	3488
IL2RA	1958	2191	2526	3954	1051	2698	2.29	5729	4247	2603	3361	1.61	4718	3275	2253	4.49	2736	4847	2688	4917	3187	5179	1653	3293	2599	1595	3043	3364	5542	4647	3132	4248	3991	0	2021	4716	3506	4511	2923	3313	0	2874	2202	4086	5547	3284	4634	2356	3445
CD4	8641	8515	9.41	9419	7.77	8918	8.67	9628	9066	8535	8882	8143	8604	8795	8004	9461	7.7	9137	7646	9771	8295	9958	8044	8128	7909	8598	7664	8306	9579	9479	8053	8551	9011	7179	7716	9743	9.02	9815	8.32	8835	8214	8.59	8157	9.19	10.02	8083	8568	8.97	8792
HLA-DRB1	11.39	11.77	11.7	12.68	9746	10.84	10.7	12.09	10.92	11.13	11.53	11.3	10.46	10.85	10.08	11.97	10.45	9927	10.25	12.5	9849	13.39	9953	10.21	10.75	10.48	10.61	10.11	12.58	12.14	10.53	11.17	11.14	10.47	12.43	12.23	12.61	12.9	10.01	11.42	11.2	11.02	10.91	12.11	12.4	9791	10.53	12.4	12.17
COL1A1	11.08	9.91	13.82	10.6	11.72	12.79	11.77	12.68	11.64	12.18	13	11.8	15.4	12.91	13.7	14.3	11.83	11.44	11.59	12.64	12.29	13.88	13.12	12.92	12.24	12.9	11.41	11.83	10.95	14.84	10.99	12.97	13.96	10.38	11.87	13.13	12.54	13.35	11.38	12.22	11.21	13.66	13.13	13.08	12.7	13.19	12	10.84	11.34
COL3A1	11.29	9593	13.93	11.13	11.52	12.73	12.37	12.69	12.41	12.49	13.67	11.25	15.32	12.88	13.57	13.77	11.79	11.29	11.26	13.25	12.22	13.48	12.47	12.66	11.94	12.95	11.49	12.47	11.88	14.4	11.54	13.24	13.78	11.09	13.04	13.29	12.14	12.65	11.84	12.05	10.5	13.55	13.17	13.45	12.7	13.29	12.72	11.23	12.2
SPTA1	0.8672	1806	0.9652	1026	0.4407	0	1043	1697	1748	1011	0	1344	0.7939	0.3896	1271	0	0.7039	0	0	0.4054	0.8255	1421	0	0	0	1146	0	1.19	0.4854	1.4	0	0.6874	0.4047	0	0.9059	0.4804	1936	0	0.4973	0.8884	0.8839	0.5725	1057	1538	0	0.3059	0.5116	0	0.411
APOA1	1405	1.05	0.9652	1026	3.83	1181	1937	0.9239	0.9143	1599	2.55	3942	0	0.6959	4.41	2566	0.7039	4778	2913	1391	5279	5405	3953	2866	1819	3669	0.9298	1698	2632	0	1883	0	1199	1566	3347	2872	1936	1645	1404	1187	1822	1299	0.4436	0.4654	1037	0.3059	0.5116	0	1213
FGA	0	0	0	0	0	0	0	0	1124	0	0	0	0	0.3896	2514	0	0	0.5342	1397	0	8.25	5913	0	0	2013	0	0	0	0	0.629	0	0	0	0	0.523	0	0	0	6464	0	0	0	0.7824	0	1037	0	0	0	0
FGB	0	0	0	0	0	0	0	4062	3538	0.5922	0	0.5975	0	0	0	0	0	8035	2266	0	7259	5222	0	0	1596	0	0.5385	0	0.4854	0	0.6757	0	1708	0.4772	0	0	0	0	1956	0.5115	0	0	0.7824	0	0.6098	0	0	0	0
FGG	0	0	0	0	0	0	0	0.9239	1307	0.5922	0	0	0	0	2389	0	0	1482	1397	0	7427	4613	0	0	0.5906	0	0	0.4011	0	0.629	0	0	0	0	0	0	0	0	5952	0	0	0.5725	0	0	0	0	0	0	0
MBP	9.99	10.27	10.17	10.3	9364	10.32	10.23	10.61	10.63	10.29	9.97	9176	10.43	10.75	9919	9787	10.36	10.63	10.46	10.56	10.01	9998	9655	9466	10.34	10.24	11.13	10.56	10.58	9817	10.49	11.03	10.74	10.71	10.95	10.29	9737	10.16	10.74	10.3	9925	10.89	11	10.7	10.77	9958	10.92	10.14	10.61
FN1	12.26	10.38	13.25	12.12	11.44	12.61	12.68	12.92	12.34	12.22	13.96	11.45	13.17	13.09	14.87	13.75	11.41	12.07	11.19	13.76	12.76	12.24	12.13	13.74	12.81	14.2	10.97	12.35	11.66	15.47	10.99	12.99	12.7	11.81	17.84	13.06	12.24	11.73	12.18	12.26	10.09	12.7	12.66	13.08	12.45	12.99	13.02	11.65	12.22
AMBP	0.4978	1806	1947	1772	1051	1638	1469	2.05	1124	1335	0	1834	1071	1799	1528	1.48	1175	3.03	1896	1391	6024	4.74	2995	0.8786	1332	0.8548	2059	0.7146	1138	0.629	2373	0.9377	2083	1905	0.523	1753	1528	2884	4.02	1992	3106	0.9813	1057	0.4654	2646	2107	1992	2072	0.7306
TFRC	11.99	10.1	10.75	11.82	9.94	9954	9805	10.72	10.42	11.01	9834	8812	10.55	9542	10.05	10.44	10.21	8818	8312	10.26	9.27	9568	9.48	8728	9198	9281	9174	10.38	10.29	9791	9713	9328	10.22	9361	10	9854	9306	8827	9706	10.5	8748	9514	9045	8976	9387	8969	9.41	9.73	9568
LTF	9617	11.98	9724	18.05	13.61	13.72	12.1	13.44	16.62	11.68	14.98	13.94	10.25	10.85	10.29	14.98	14.18	10.09	12.34	15.75	12.85	13.9	12.64	11.04	13.44	12.53	9619	9739	13.09	9.69	13.82	15.71	13.21	12.9	16.29	13.43	11.48	16.21	14.14	13.1	13.06	13.26	13.38	17.23	14.31	11.23	14.37	18.67	12.98
BGLAP	5087	6535	5.08	5791	6278	5759	5.17	6442	4653	5253	5349	7678	5783	4044	5792	5148	5783	7037	6023	4575	5652	6.84	7764	6234	6405	6184	6479	5362	5122	8869	5.53	4849	5205	5772	5318	5075	6081	7114	5928	5189	8243	5441	6125	5838	6031	4668	5096	5436	5189
VTN	2759	1651	4547	2038	3506	2497	2.81	3182	1124	3106	4.5	3619	6339	1664	5126	4307	0	4098	3108	3334	6392	5845	7049	5395	6548	3525	7071	1.19	4818	1.4	2197	3.69	1969	2512	7584	3154	2253	2393	1795	3042	1428	1781	1057	3395	3526	0.9152	2799	1502	3307
CAT	11.75	11.59	11.75	11.31	10.96	11.26	11.43	10.88	11.83	11.12	11.41	10.87	11.73	11.59	10.72	11.28	10.85	10.62	10.83	11.8	11.15	11.05	10.28	10.5	11.35	11.18	10.94	11.06	12.46	9101	11.38	10.93	11	11.75	11.41	11.89	10.28	10.04	11.06	11.14	9908	11.7	11.33	11.29	11.15	10.97	11.54	11.18	12.13
ALDOA	14.09	14.15	13.81	13.92	14.69	14.1	14.09	13.69	13.53	13.83	13.95	14.87	13.93	13.81	14.78	14.28	13.14	13.73	14.47	13.61	14.53	14.37	14.64	14.83	14.26	14.79	13.59	13.96	13.55	14.05	13.79	13.55	13.99	14.15	14.61	14.22	14.07	15.13	13.7	13.84	14.58	13.86	14.02	14.11	13.67	13.32	13.4	13.82	13.62
ANXA1	12.89	12.65	12.68	12.91	11.71	11.59	12.18	11.67	13.09	12.99	11.65	12.24	12.18	11.59	11.92	11.9	12.52	11.48	11.76	12.11	11.99	12.62	10.8	11.76	12.36	11.31	9835	10.97	13.73	11.29	11.58	11.42	11.16	12.37	12.31	12.38	12.12	10.93	11.5	11.78	10.86	10.86	11.49	11.31	11.37	9.05	11.74	12.3	13.13
PRNP	12.07	11.51	11.93	12.15	11.97	12.15	12.13	11.52	12.16	12.19	12.41	11.54	11.46	11.58	12.44	12.38	11.46	11.93	10.94	12.21	11.52	11.45	11.3	12.5	11.33	12.25	10.8	11.38	12.21	11.24	11.13	11.48	11.45	11.7	11.77	12.76	11.13	10.81	11.26	11.83	10.56	11.19	11.3	11.92	11.39	11.24	11.68	11.45	11.9
HRG	0	0	0	0	0	0	0	0	0	0	0	0	0	0	0	0	0	0	1397	0	2281	3905	0	0	1332	0	0	0.4011	0	0	0	0	0	0	0	0	0	0	0	0	0	0	0	0	0	0	0	0	0.411
THY1	6976	5886	9.93	6778	7173	8899	9285	9306	7731	7685	8226	9334	10.56	8092	10.4	10.01	8.8	10.05	8322	8917	8542	10.39	10.53	10.23	9104	9024	7796	7422	9055	11.06	7715	8477	9896	7545	8987	9506	9176	10.37	8113	9073	8755	9127	9154	9.08	8893	8985	8506	7386	8569
CD74	14.25	15.12	14.53	15.32	13.91	14.29	14.43	15.2	14.35	14.02	14.14	13.89	14.17	13.75	13.37	15.35	13.5	15.53	14.27	14.77	13.41	15.75	13.79	14.4	14.05	14.56	13.04	13.15	14.57	14.67	13.88	13.59	14.67	13.82	15.25	15.01	15	15.64	13.79	14.67	14.28	14.61	13.73	15.34	15.61	13.05	13.61	15.47	14.16
VWF	12.36	9.32	12.69	11.26	8652	12.37	12.05	10.89	11.42	10.86	13.16	10.15	12.57	12.3	12.34	11.99	10.49	11.65	9649	12.83	10.86	11.92	11.31	10.57	9.93	10.57	11.65	10.36	10.55	11.61	10.88	12	12.33	9728	11.55	12.15	10.67	12.26	10.36	11.23	11.58	11.61	11.19	11.86	11.95	11.09	11.93	10.65	10.78
HLA-A	13.87	15.19	13.51	14.07	13.78	13.34	13.94	15.27	13.08	13.48	13.67	14.36	13.42	12.93	13.14	14.21	13.01	14.07	14.94	13.9	13.55	15.15	14.3	14	13.8	13.81	12.95	13.58	14.28	13.61	13.21	12.9	13.52	13.83	13.76	14.26	14.37	14.6	12.83	14.15	14.58	13.54	12.57	14.57	14.48	11.86	12.57	13.88	14.12
HLA-DPB1	11.13	11.49	11.41	11.77	10.8	11.34	11.29	12.1	11.39	10.98	11.03	12.02	10.91	10.12	10.56	11.72	10.11	11.9	10.23	11.52	10.71	12.67	11.77	11.03	10.71	11.33	10.25	10.14	12.13	12.01	10.98	10.46	11.52	10.56	10.75	11.6	11.79	12.75	10.66	11.15	12.5	10.9	11.1	11.63	12.39	9978	10.36	11.34	11.44
ERBB2	12.57	12.9	13	12.88	13.19	12.72	13.07	12.18	12.56	12.75	12.13	13.02	12.98	12.62	12.44	12.29	12.74	12.4	12.52	12.65	12.66	12.55	13.56	12.63	12.67	12.8	11.7	12.84	11.93	12.05	13.01	12.33	12.62	13.04	13.17	12.16	12.91	12.78	12.66	12.88	13.44	12.83	12.75	12.23	12.61	12.11	11.88	13.3	12.6
WNT1	1161	1946	1947	2456	1808	1427	0.4368	2.05	0.3728	1823	0.5276	0	0.4508	0.6959	0.9576	1.48	0	2454	1896	1559	1551	1694	0	1631	2013	1146	1237	0.972	2.07	0	0.6757	1151	0	1122	1458	1573	0.9574	3402	0.4973	0.8884	0	2141	0	2265	2971	0.5582	1187	0.938	0.992
HSPB1	14.47	15.82	13.35	13.41	14.92	13.92	13.45	12.81	13.14	13.73	13.25	15.1	12.14	12.67	14.69	14.33	13.46	14.73	13.08	13.01	13.82	14.28	15.49	14.86	13.16	14.89	11.26	12.26	12.72	15.13	13.23	11.89	13.45	13.7	13.7	13.54	15.11	14.81	12.87	13.18	14.94	12.83	12.93	12.54	12.85	11.59	11.05	12.79	12.99
SLC4A2	10.71	10.88	11.13	10.92	11.08	11.33	10.97	10.74	10.82	10.94	10.96	11.28	11.76	11.22	11.07	10.68	11.39	10.49	10.82	10.82	11.03	11.14	11.49	10.91	11.1	10.78	10.94	10.66	10.39	12.1	11.15	11.02	11.15	10.91	10.52	10.75	10.64	11.91	10.74	11.27	11.51	11.12	11.37	10.89	10.9	10.92	10.56	11.35	10.8
IGF1	8658	8.22	9115	9253	8.82	9943	9434	9361	9627	9713	11.59	8533	9169	10.21	9823	11.56	10.62	10.35	7.54	10.32	8715	8457	8.07	10.64	8788	8761	7.4	9697	9581	8122	9087	9415	10.09	8689	10.4	11.13	7254	8068	8188	8499	7.51	10.78	8755	9666	10.32	8604	10.86	7966	10.21
ATP1B1	11.58	12	11.57	12.36	11.84	10.83	11.01	9913	11.28	11.34	10.92	9809	11.13	10.55	11.57	11.08	9632	11.85	10.85	12.18	10.15	10.74	11.3	11.36	11.12	12.28	10.81	10.67	10.91	11.69	10.45	10.79	10.17	11.57	12.74	11.48	10.59	10.66	10.77	12.05	10.16	9967	10.42	11.29	11.02	8783	10.07	11.79	11.09
APP	13.68	13.61	13.88	13.85	14.01	14.36	14.48	13.02	14.02	13.46	14.21	13.27	14.52	13.84	14.14	13.78	12.67	12.69	14.02	14.38	14.19	13.28	12.47	14.53	14.23	14.36	13.29	14.09	13.6	14.23	14.13	13.85	14.1	13.97	15.48	13.95	12.97	12.52	13.39	13.7	11.89	14.14	13.99	14.59	13.51	14.71	14.9	14.33	13.95
ARG1	1405	1279	0.5619	1447	0	1427	0	0.5347	0.9143	1011	0.913	0	0.7939	3872	1271	2195	1175	0.9231	1063	2086	4809	2122	1384	1175	0	0	0.5385	0.4011	1765	0	1318	0	1708	1122	0.9059	1128	2734	0.6151	1795	0.5115	0	2669	3561	0	1.86	0.3059	1187	0.938	2925
APOD	9189	11.38	11.3	10.51	9705	10.7	10.68	11.38	10.98	10.47	10.92	10.55	13.26	10.99	10.7	12.9	9.57	12.76	11.39	11.94	10.18	12.06	11.44	11.49	11.51	10.24	12.76	10.08	11.33	13.81	10.91	11.26	10.41	9552	9326	11.16	10.3	11.61	10.88	11.71	10.46	11.01	9967	12.28	12.08	11.9	12.79	9.97	11.01
ITGB3	7258	2746	8575	7595	7246	8015	7957	7059	7688	7996	8971	5542	6602	7594	8717	7899	5388	6014	4577	8812	8057	5.11	4002	7981	6476	7897	6028	7035	7131	5295	6413	7619	6829	6223	8148	8852	6298	4.67	6.33	6.83	3818	6.94	6922	7267	5701	7657	7685	7131	7785
ITGB2	8.84	9098	9697	10.26	8265	9561	9408	10.17	10.07	9074	9.54	9524	8821	9529	7775	9883	8.65	8.72	8249	10.4	8977	10.62	8555	8609	8803	8789	8811	8697	9929	10.03	8793	9415	9877	7619	7864	10.41	9828	10.85	8446	9478	9038	9583	9075	9912	10.62	8.68	9158	9383	9434
S100A8	7.44	9294	6.12	6949	4988	6186	5441	7.22	6.58	6799	5835	5166	4718	6.35	5657	5487	4638	5994	4402	7786	3.82	7771	5098	4.25	3015	4461	5351	4034	8643	5055	4906	6479	4914	3918	4646	8439	5375	6445	4918	4421	5739	3136	3876	5647	5.8	4244	4964	5269	6.33
IL4	0	0	1.28	0.4278	0	0	0	0	0	0.5922	0	0	0	0	0	0	0	0	0	0	0	1421	0	0	0	0	0.5385	0	0	0	0	0	0.4047	0	0	0	1528	0	0	0	0	0	0	0.4654	0	0	0	0	0
SERPINE1	10.4	9.24	12.06	9091	6.39	9.73	8294	12.41	10.27	10.69	11.98	5059	12.32	10.28	11.05	10.83	10.98	13.44	7548	12.01	7788	12.64	8256	9137	9163	8014	8818	6564	9881	11.53	8733	9349	10.65	5357	8556	10.71	8128	7468	11	10.39	8373	7934	8.26	8434	8402	7948	8869	6962	7484
ISG15	7872	9412	8178	7985	8783	9862	9131	11.35	8.05	8.77	8345	10.12	9744	9343	9138	11.56	7.73	9313	8901	8242	8337	10.57	11.38	9396	8721	8909	7312	8923	8634	10.09	9284	6951	8915	8078	7623	8951	12.46	10.22	7978	9081	10.98	8.59	8552	8699	10.01	7675	7041	7658	9068
FGF1	5633	5533	5.85	7643	6795	6344	6775	5933	6488	6468	5379	6386	4975	6.06	7666	5092	5204	2048	5.53	6437	7072	6192	5.8	6257	6624	5917	4289	6173	6.83	10.14	5.4	6542	6213	6535	4695	6635	7254	6933	5619	6484	5859	5.23	6246	6493	6.16	5.08	5373	6793	6093
IL6	10.89	5124	9.75	7307	5362	6.54	6.2	5371	6787	8041	8977	2.49	5584	6317	9486	9353	8599	8938	5026	7754	1889	5424	6.31	6882	5104	5386	5367	0.7146	9138	1066	6955	5033	6477	3433	6377	8592	5238	4332	6402	7737	4766	2775	1057	2826	5.84	3212	4863	3836	4628
ICAM1	10.65	9073	10.62	10.6	7922	8807	8859	11.02	9115	10.1	9892	8197	10.35	8899	9134	11.65	9925	11.63	9.38	9865	8864	10.25	8.5	8163	9302	8765	11.03	8306	9747	9583	8527	9093	9839	7825	8.7	10.27	8.74	9899	10.63	9889	9267	8452	8.23	10.06	9679	8121	9866	8999	8647
RPLP1	14.6	15.38	14.2	14.58	15.13	14.65	14.85	15.17	14.33	14.7	14.08	15.92	14.9	14.06	14.97	14.94	14.87	15.55	15.66	14.19	15.02	15.82	16.44	15.23	15.03	15.69	15.02	14.38	14.86	15.48	14.67	14.38	14.88	15.14	14.28	14.98	15.93	16.47	15.42	14.81	16.48	14.74	14.77	14.89	15.22	14.72	14	14.51	14.51
RPLP2	13.15	13.83	12.79	13.33	13.83	13.46	13.43	14.08	12.9	13.28	12.88	14.75	13.86	12.79	13.67	13.89	13.91	14.93	14.58	12.78	13.78	14.66	15.91	13.98	14.09	14.34	14.17	12.86	13.36	14.27	13.55	12.91	13.63	13.96	13.1	13.35	14.42	15.68	14.25	13.43	15.88	13.35	13.63	13.82	13.93	13.63	12.73	13.2	12.74
RPLP0	14.6	14.74	13.75	14.63	14.76	14.45	14.62	15.04	14.16	14.76	13.76	15.42	15.17	14.44	14.34	15.1	14.86	15.21	15.45	14	14.6	15.35	15.75	14.63	15.1	15.02	15.35	14.38	14.79	15.57	14.89	15.06	14.88	15.31	14.06	14.66	15.17	16.16	15.58	14.67	16.15	14.67	14.57	15.11	15.06	15.21	14.44	14.48	14.42
ITGB1	13.18	11.87	13.39	12.91	12.74	13.2	13.01	12.9	13.19	13.08	13.78	12.1	13.1	13.09	13.69	13.24	12.46	12.93	12.7	13.5	12.8	12.41	11.82	13.19	12.55	13.14	13.08	12.91	13.15	13.44	12.73	13.12	12.84	12.94	14.2	13.75	12.12	11.93	12.74	12.82	11.43	12.87	12.55	12.67	12.41	12.98	13.47	12.68	13.27
KRT18	13.54	14.19	13.17	13.33	14.15	13.86	13.33	14.24	12.72	13.39	13.01	14.56	13.81	13.36	13.08	14.32	14.48	15.28	14.53	12.8	13.7	14.38	14.77	13.88	14.25	13.33	13.88	13.15	13.23	13.79	13.91	12.95	14.3	14.07	13.4	12.42	14.54	14.8	14.38	13.4	15.74	14.22	13.95	13.8	14	13.35	13.4	13.79	13.18
CD5	5714	6273	6.89	6.9	5455	5.9	5812	7344	5941	5848	5129	3619	5088	5335	4775	6896	5102	7472	5228	6625	5112	7299	5.97	5244	4744	5177	4034	5851	7743	10.8	5545	6071	5866	5227	3217	6751	5937	7.87	4256	6286	4766	4719	5108	6739	7965	4414	5554	6142	5675
LCK	6947	7654	7438	7.72	6.48	7001	6448	7162	7014	6898	6003	7227	5648	6.55	5761	6642	5.59	7608	6121	7382	6531	7895	6715	5848	6805	6107	5858	6.89	8147	6009	7221	6808	6641	6137	5168	7.56	7594	8568	5971	7216	7.29	6123	6596	7306	8.63	5903	6964	6823	7014
FYN	7884	7597	8914	8406	7232	8327	7994	8714	8337	8156	8396	6907	8506	7935	9613	8724	7211	9381	7484	8939	7.24	8738	7396	8352	7067	7779	7793	6936	8507	8656	7543	8009	8067	7102	8061	8993	8185	8399	6993	7766	7026	7581	7355	8195	8879	7118	7885	7093	8098
GSN	13.07	12.49	14.36	12.85	12.78	13.54	13.65	12.94	13.4	13.18	13.69	13.38	13.49	13.1	15.16	14.19	12.37	13.09	12.18	14.04	13.28	13.94	13.72	14.07	12.66	13.78	12	11.9	12.74	14.4	12.63	12.6	13.61	12.81	13.62	14.14	12.91	13.9	12.56	13.14	13.24	13.13	12.75	13.13	13.27	12.64	12.72	12.68	13.19
S100A9	10.41	9914	8959	10.51	7597	7976	8486	8577	8754	9524	7885	7731	6159	7621	6594	7353	7.18	6882	6209	9321	6007	9243	7573	5228	6476	6037	7742	5193	9869	6412	7337	8.22	6944	6055	7128	9599	7315	9122	7122	6998	8538	5833	6139	8514	7444	5613	6689	7904	8152
APOA4	0	0	0	0	0	0	0	0	0	0	0	0	0	0	0	0	0	4996	0	0.4054	5.16	0.6406	0	0	0	0	0	0	0	0	0	0	0	0	0	0	0	0	0	0	0	0	0	0	0	0	0	0	0.411
CD2	6757	7697	7688	8531	7746	7172	6654	7878	7508	7161	6.08	6156	5383	6.26	5893	7233	6012	8683	6613	7541	6445	8377	7349	6378	6392	6282	5.64	6773	8179	7144	7329	7.03	6841	7119	4961	7662	7958	9.24	6423	7479	8009	6.32	6364	7923	9043	5459	6819	6988	7279
CEACAM5	6544	7.44	6.07	7734	3.83	5.76	9354	7986	7794	5749	4609	3842	6067	6481	7023	6824	4709	5532	8722	6571	4.5	5479	5945	2489	3408	3525	7174	2689	7461	4615	5326	4768	4.33	5371	1208	5865	6857	3837	6.38	6.23	4625	6.69	4275	6775	5687	4381	5702	5302	5465
ENO1	13.88	13.5	13.03	13.59	13.62	13.43	13.71	13.81	13.22	13.42	13.31	14.04	13.82	13.03	13.84	13.86	13.37	13.79	14.24	13.06	13.73	14	14.33	13.83	13.95	13.73	14.22	13.5	13.04	12.99	13.61	13.34	13.71	13.67	13.78	13.46	13.55	14.14	13.78	13.7	14.32	13.55	12.98	13.95	13.46	13.38	13.25	13.62	12.99
FCER2	1405	0	2266	1251	1.28	1181	2485	2333	1307	0.3262	2032	1019	1071	0	0.9576	1.48	1.53	4913	1063	2.63	3305	2122	1384	4511	0.5906	1595	0	0	4088	0.629	0	2019	0.4047	1566	0.9059	2057	0	5801	0.8664	2272	1181	0.5725	0	1874	4685	0.3059	0.8885	1247	0.992
NPM1	12.68	12.59	12.09	13.21	12.84	12.73	12.94	13.35	12.68	13.01	12.57	12.47	13.73	13.03	12.66	13.29	12.82	13.23	13.23	12.71	12.67	13.48	12.67	12.95	13.19	13.21	13.11	12.7	13.11	13.79	12.81	13.26	13.08	13.01	12.63	13.07	13.22	13.23	13.5	12.91	12.83	13.29	13.14	13.47	12.91	13.38	13.18	12.59	12.54
ITGAV	11.31	10.8	11.5	11.55	10.6	11.38	11.3	11.25	11.64	11.24	11.8	10.22	11.4	12.46	10.92	10.98	10.78	10.89	10.84	12.05	10.77	10.82	10.21	10.77	10.89	10.53	11.51	11.58	11.73	11.36	10.74	11.57	10.88	10.92	11.18	11.54	9793	10.39	10.74	11.11	10.26	11.7	11.49	11.23	10.85	12.89	12.83	11.72	11.71
SERPINE2	7.33	6769	7.98	7.72	7.11	7416	8066	7336	8223	7462	9174	6702	8117	7899	8467	8761	7642	8924	6856	9127	6759	7745	7026	8452	7094	7022	6857	6721	8.27	10.47	7733	7624	7492	8212	5917	9366	7469	6889	7452	7936	6528	7848	6972	8436	7117	7056	7943	6055	8.17
P4HB	14.06	14.94	14.07	14.27	14.83	15.43	14.57	15.03	14.43	14.53	14.68	15.5	15.54	14.99	14.24	15.48	15.63	14.89	16.07	14.16	14.94	15.3	15.85	14.86	15.74	14.35	15.22	14.39	14.5	14.73	15.55	14.52	15.77	15.66	14.69	14.37	15.01	16.47	15.75	14.71	16.45	16.04	15.26	15.4	15.37	15.79	15.86	15.24	14.63
FES	8992	8851	9.41	8316	10.04	8485	8979	8097	8542	8886	8.2	10.11	7964	7646	9015	8851	7704	8584	8315	9015	9178	9715	9.88	8963	8462	9.27	8318	8031	8677	8105	8602	8432	8472	8099	8602	8751	8933	8764	8316	9495	8811	8068	7701	8439	8557	7931	7448	8832	8771
ANXA2	13.98	13.35	13.27	13.64	13.05	12.61	12.94	13.17	13	13.14	12.97	13.51	12.25	12	13.37	13.08	12.78	13.31	12.11	13.25	13.35	13.34	12.79	13.21	13.54	13.19	10.8	12.43	13.47	12.08	12.97	11.91	12.43	12.82	13.59	13.56	13.17	13.59	12.79	12.86	12.26	12.31	12.91	12.52	12.19	10.6	11.66	13.06	13.33
GP1BA	4058	3.03	4456	3747	2425	3632	2343	3361	3812	3492	3641	2028	3.97	4773	4071	2512	0	3499	1712	3805	3003	4058	1498	2.78	1195	2.84	2579	3966	4878	3385	3227	3768	2628	0	2099	4448	3421	2281	2038	3426	2109	3537	3036	3187	3875	3938	3373	3578	4015
CAPN1	12.7	12.74	12.61	12.63	12.46	12.46	12.76	12.16	12.26	12.53	12.19	12.85	11.89	12.02	12.75	12.38	11.9	11.06	12.33	12.38	12.75	12.56	12.46	12.5	12.49	12.78	11.85	12.5	11.77	11.51	12.19	12.03	12.16	12.37	12.87	12.31	12.37	12.42	11.75	12.53	11.86	12.24	12.13	12.38	12.01	12.01	11.85	12.6	12.07
PFN1	12.77	13.09	12.7	12.84	13.38	12.92	12.93	13.21	12.63	12.95	12.96	13.56	13.15	12.68	13.63	13.66	12.93	14.19	13.89	12.69	13	13.77	13.75	13.87	13.54	13.64	12.97	12.44	13.07	13.34	12.98	12.37	13.24	13.3	13.01	13.26	13.53	14.4	13.19	12.94	13.62	13.16	13.09	13.31	13.22	12.34	12.56	12.86	12.8
CD3E	7.53	8589	8395	8849	8224	7536	7624	8504	7659	7359	6642	6792	6346	6638	6415	8429	6676	9888	7435	8033	7149	9137	7368	7769	6738	7409	6333	6913	8424	7639	7613	7392	7.39	7518	5059	8039	8433	9574	6809	7672	7739	6905	6586	8389	9379	5549	7249	7386	7457
UMOD	2468	3024	0.5619	0.4278	0.4407	2385	1797	0.9239	2182	3106	1681	2352	0.4508	1664	0	0	1175	1696	4022	0.7216	0	1083	0	0.5052	1819	0.4897	0.9298	0.4011	1378	1672	1134	1151	0.4047	1905	0	0.8401	1528	0	0.4973	0.8884	0	0	1.66	2477	1037	1749	1992	0.5439	1213
LAMB1	11.25	9599	12.41	9582	9517	10.43	11.27	9861	10.41	9493	11.77	9.48	11.37	10.22	11.5	11.78	8983	11.05	10.13	11.49	10.46	10.12	9762	10.86	9918	10.92	12.25	9753	9683	11.35	9651	10.86	10.18	9.09	10.66	11.5	8868	9227	9615	10.84	8611	9623	9.71	10.62	10.37	11.13	10.66	9723	10.09
YES1	10.38	10.15	10.12	10.6	9988	10.15	9981	10.51	10.49	10.53	10.28	9497	10.32	10.69	9744	9973	10.26	9941	10.25	10.21	10.09	9547	9245	9895	10.48	9941	10.7	10.57	10.49	10.6	10.01	10.44	10.24	10.13	10.21	10.1	9514	8808	10.51	10.15	9123	10.58	10.27	10.41	10.18	10.73	10.95	10.13	10.35
LYN	8529	8824	9033	9.81	8243	8832	8661	9754	9307	8898	8954	7953	9.27	9231	7911	9452	9046	8677	8737	9.66	8602	8864	7819	8318	9149	8.54	8859	8817	9813	8785	9018	9173	9582	8798	10.08	9716	9201	8552	9.35	9414	8278	9083	9187	9.14	9.42	8597	9072	9418	9486
RET	4899	5017	6819	7622	5036	8895	6.83	10.27	6.44	8.67	6466	6026	6517	9497	8.3	7801	10.02	6707	8105	8.76	7259	7258	7172	6787	8339	6081	7057	4.82	6758	10.58	7177	7968	8999	10.02	8172	6014	8642	6186	10.77	8106	10.5	8318	8.77	7.69	9972	5814	8432	8768	7061
THBS1	12.69	11.61	13.06	13.38	12.24	13.15	11.51	13.98	11.84	13.77	14.03	9828	12.84	12.42	13.08	12.91	13.44	13.43	10.7	13.83	10.78	12.41	9758	11.08	12.3	10.7	11.87	11.56	11.88	12.51	11.06	11.66	12.41	10.43	10.9	13.73	11.34	9599	12.73	13.26	8708	11.26	11.06	11.94	10.97	12.51	11.92	11.17	11.3
ANXA6	11.19	10.24	12.04	11.42	11.56	12.16	11.92	10.73	11.76	11.36	12.47	12.1	10.72	11.48	13.07	12.03	10.31	11.7	10.59	12.19	11.75	11.89	12.05	12.51	11.15	12.35	10.65	10.7	11.55	11.46	11.14	11.21	11.49	11.51	12.65	13.02	11.32	11.71	10.74	11.53	11.16	10.91	11.02	11.42	11.14	10.78	11.36	11.36	11.72
CD55	13.08	11.3	12.21	11.26	10.29	10.48	9637	9812	9.29	11.12	9292	9064	10.18	9103	9255	9809	10.04	9189	8734	11.05	9227	9483	9449	9.17	9118	9721	9709	10.28	11.41	10.57	8562	8706	9519	9656	10.01	9463	9457	8898	9954	9995	8446	9733	8449	8496	9665	7347	8803	9478	10.11
SLC3A2	11.8	12.11	11.27	11.38	11.98	11.57	11.74	11.89	11.36	11.55	10.92	12.33	11.4	11.48	11.39	12	12.13	12.12	11.49	11.12	11.71	12.35	12.12	11.54	12.15	11.87	10.77	11.12	11.48	13.05	11.87	10.57	12.01	11.78	11.95	11.33	11.9	12.85	11.82	11.66	12.12	11.26	12.08	11.56	11.72	11.61	10.8	11.56	11.73
CELA2A	0.4978	0	0	0	0	0	0	0	0	0	0	0	0	0.3896	0	0	0	0	0	0	0	0	0	0	0	0	0	0	0	0	0	0	0	0.8351	0	0	0	0	3866	0	0	0	0	0	0	0	0	0	0
HSP90AB1	15.11	15.64	14.2	14.72	15.14	14.78	14.94	14.72	14.63	14.57	14.47	14.79	15.14	15.06	14.81	15.01	14.69	14.71	14.9	14.41	15.04	14.92	14.96	14.82	14.84	15.02	14.84	14.82	14.28	15.17	14.73	14.77	15.02	14.8	15.02	14.6	14.95	14.8	14.87	14.82	14.86	14.9	15.12	15.01	14.69	15.28	14.73	14.45	14.4
ELANE	1614	0.7768	3185	0.4278	1948	2698	3299	2333	1616	2.41	3589	2839	2927	2575	2514	4307	1814	4373	1668	3238	1551	3314	3414	3521	2599	2445	0.5385	1834	1765	1.9	1761	1151	2964	1361	1458	4.8	1528	1871	1795	2394	2602	2141	1816	2375	3388	0.5582	2272	1502	2.21
MME	12.24	13.42	11.94	12.84	11.38	11.27	13.24	9716	14.02	12.2	12.51	11.24	8909	14.71	11.11	11.36	12.22	8974	10.89	12.87	12.13	11.5	10.49	10.89	12.65	11.56	10.06	11.36	13.8	8.7	12.74	12.04	12.06	11.84	10.95	13.29	11.58	14.26	11.33	11.11	10.95	13.71	14.51	12.07	12.77	8727	11.71	11.9	14.62
ITGA2B	3331	2191	3396	2456	4182	1638	2.29	2333	1748	2973	2.18	3942	1835	2036	2514	1.48	1.53	2568	1668	2841	2032	3314	4682	1631	1008	2082	2059	1698	1585	3019	1761	2019	1557	1745	4399	1913	2513	3166	2667	2707	3422	2669	1485	1538	2.52	1408	1187	0.5439	1726
PLEK	6537	7149	7356	8518	5546	7.38	6618	8675	7917	7381	7458	5429	6961	7169	5392	6807	6315	6871	5.29	8375	6186	8079	5607	5452	5924	6107	6267	6654	9.28	6756	6589	7446	7693	5343	4981	8743	7728	7905	6132	7476	6454	6776	6644	7773	8491	6366	7391	7044	7.77
PTPRC	9117	8631	9397	9909	7489	8714	8341	9748	9712	8703	9038	6472	8342	8901	7341	8551	7329	8678	7064	10.33	8138	8912	5.8	7362	6731	7.7	6986	8716	10.57	8257	8.28	9272	8081	7369	7496	10.05	7565	7498	7.66	8961	5.75	8147	7823	9055	10.25	8193	9414	8673	9356
HCK	7558	7602	7665	8146	6623	7472	7096	7793	7809	7864	7638	7082	7007	7.15	6735	7481	6326	6148	5889	8536	6664	8502	6655	6192	6646	7837	6106	6.81	8307	7347	7097	7.36	7474	6381	7078	8789	7662	8238	6.33	7582	6868	7082	6607	7622	8117	6387	6615	7321	7.84
ITGA5	11.42	8629	11.97	11.04	10.34	10.97	11.2	11.69	10.17	12.09	12.54	10.35	10.58	10.41	13.82	12.3	10.75	12.94	9991	11.31	12.23	12.39	10.15	13.7	11.21	11.98	10.17	10.13	9549	10.57	9864	10.72	11.76	10.25	11.71	11.77	10.73	11.12	11.76	11.37	10.49	11.05	10.97	11.12	10.31	10.34	10.24	10.74	10.78
VIM	12.63	12.01	14.05	12.63	12.14	13.22	13.5	13.02	13.54	12.69	13.52	12.31	13.24	13.12	14.24	14.23	11.91	13.55	11.79	14.05	12.37	13.67	13.02	13.75	12.95	12.88	14.61	11.6	13.81	13.96	12.6	12.59	13.3	12.12	13.47	14.41	12.67	13.54	12.51	12.82	12.4	12.89	12.36	12.77	13.34	11.94	12.45	11.78	13.96
SERPINF2	7.43	8774	7548	9038	7388	8406	8.35	10.22	8654	9623	8569	10.36	6217	8326	7153	8797	8915	9571	8719	9118	9183	9567	9647	9695	9971	8158	8876	6875	9931	6941	8.79	8191	9152	8726	12.71	9415	8128	8943	8974	8426	9546	9324	7528	9257	8.84	6387	8.96	8623	9526
RPS17	13.29	13.61	12.38	14.03	13.54	13.53	13.21	14.44	13.04	13.32	12.64	14.78	13.81	13.27	13.47	13.6	14.08	14.31	14	12.82	14.14	14.84	14.98	13.92	13.75	13.95	14.33	13.39	13.63	13.84	13.31	13.12	13.43	13.71	12.75	13.51	14.21	14.96	14.6	13.28	15.04	13.94	13.41	13.61	13.95	13.79	13.37	12.78	13.48
ANXA5	12.1	12.63	12.18	12.36	12.55	12.32	12.73	12.9	12.6	12.28	12.49	12.4	13.56	12.07	12.41	12.9	12.07	13.2	13.69	12.5	12.84	13.16	11.92	13.06	13.41	12.59	13.59	12.88	13	12.73	12.53	12.71	12.62	12.61	12.88	12.89	12.59	12.3	12.52	12.37	11.78	12.47	12.8	13.22	12.49	13.33	12.97	12.67	12.94
RPSA	12.5	12.77	11.54	12.39	12.85	12.53	12.65	13.03	12.26	12.77	11.96	13.65	13.2	12.37	12.73	13.09	13.1	13.78	13.23	12.24	12.53	13.48	14.17	12.67	12.92	13.04	12.97	11.94	13.09	13.69	12.73	13.04	12.89	13.35	12.2	12.85	13.2	14.2	13.03	12.82	14.56	12.78	12.55	13.04	12.98	12.93	11.97	12.5	12.43
CD63	13.03	13.55	12.96	13.27	13.76	13.15	13.27	13.56	13.09	13.28	13.08	14.1	14.24	13.2	13.56	13.65	13.59	14.14	13.73	13.08	13.53	14.26	14.33	14.08	13.99	13.69	13.52	12.74	13.83	13.83	13.38	12.59	13.69	13.81	13.55	13.58	13.83	14.41	13.59	13.22	14.11	13.77	13.43	13.59	13.62	13.36	13.1	13.29	13.4
PKHD1	4879	3634	6.53	5.53	3147	5189	5521	2456	4.13	6922	4078	1344	4379	3902	4532	3315	2434	3555	1668	6056	3739	2452	2895	3468	3823	3473	2343	3364	5255	5633	5316	4685	6188	3841	7713	2617	3727	3837	5296	4558	5012	3609	4248	3446	6642	3016	4707	4.01	4508
FGF2	7.86	6293	9143	8.36	8096	8936	8703	8796	9057	8517	9533	6936	7518	8353	9263	8847	6814	9248	6926	9724	7572	8158	6941	8975	7391	8621	6485	7.49	8499	7677	7732	8225	7509	7506	8511	9582	6893	6058	7418	8681	5438	7209	7528	7849	7.33	7676	8328	7699	8983
GSTP1	13.22	12.95	12.33	12.62	13.24	11.66	12.57	12.55	11.96	12.44	11.53	13.79	11.02	10.59	12.69	12.02	10.77	11.71	11.36	12.03	12.24	12.8	13.66	12.78	12.06	13.56	9747	11.62	11.96	10.93	11.98	10.66	11.05	12.65	14.18	12.38	12.37	12.84	10.84	12.58	12.74	11.26	10.49	11.45	11.36	9026	9775	12	11.77
LGALS1	10.72	9717	11.83	10.71	11.4	11.25	11.65	11.19	11.24	11.61	12.3	11.91	11.2	10.6	13.17	12.26	10.13	12.54	10.71	11.78	11.57	11.87	12.72	13.22	11.14	12.23	9983	10.06	11.85	12.79	10.9	10.5	11.61	11.4	11.43	12.87	11.88	12.52	10.4	10.91	12.14	11.14	10.87	11.21	11.22	10.4	9948	10.03	11.47
HMGB1	12.05	12.32	12.09	12.72	12.4	11.93	12.24	12.23	12.24	12.26	12.12	12.31	11.94	12.11	12.43	12.27	12.14	12.36	12.47	12.11	12.13	12.53	12.18	12.4	12.54	12.47	12.6	12.41	12.78	13.06	11.77	11.84	11.77	12.57	12.06	12.59	12.24	11.99	12.3	12.2	11.76	11.95	12.2	12.38	12.33	11.83	12.18	11.93	12.24
TPM1	13.06	11.46	13.59	13.76	13.91	13.88	14.05	12.77	13.72	14.17	14.7	14.1	11.94	13.35	16.19	13.77	12.78	13.35	12.78	13.92	14.47	13.65	13.64	15.13	13.4	14.8	12.95	13.06	14.03	12.75	13.1	13.46	13.53	13.94	14.49	15.05	13.31	13.37	13.24	13.37	13.13	13.13	13.61	13.6	12.25	13.05	13.11	13.36	13.87
INHBB	9.13	9304	9455	9395	9.59	9608	9579	9161	9534	9306	9736	8565	8166	9542	8408	9571	10.17	9688	9462	9258	9359	9115	9083	9789	9923	9664	10.16	10.21	9249	11.52	10.03	9835	9523	10.39	6075	9461	9.19	8192	9277	9.72	8796	9474	10.33	9663	9408	9723	9845	9777	9745
CSF1	8493	8225	9325	9161	7762	8794	9406	9552	8694	8718	9174	7883	8979	8549	8936	9385	7605	7454	7439	9675	8524	9102	6902	8661	8374	8894	7312	7777	8056	8466	8161	8.42	8699	7872	9076	9366	8532	8.17	8.7	9329	6315	8089	7881	8865	9002	7706	7921	8705	8274
PDGFRB	9355	8697	11.93	9984	9792	10.89	10.61	10.54	10.74	10.63	11.1	9065	12.44	11.02	10.86	11.94	9885	10.68	9298	11.95	9878	11.39	10.3	11.01	9754	10.53	9758	9796	9988	12.36	10.03	10.89	11.62	8689	10.38	11.47	10.26	10.7	10.1	10.93	9356	10.76	10.7	11.43	10.66	10.93	10.88	9618	10.23
TACSTD2	13.58	14.23	13.46	14.21	14.39	13.73	13.73	13.46	13.4	14.05	12.43	14.11	13.31	13.23	13.5	13.63	14.85	12.83	14.06	13.37	13.93	13.55	13.82	13.68	14.14	13.75	12.9	13.41	13.57	12.99	13.54	13.11	13.65	13.46	13	13.01	14.45	12.98	14.1	13.23	13.64	13.6	13.55	13.75	13.41	13.51	13.41	13.64	13.69
ALOX5	10.97	10.35	9909	10.03	9027	9047	9766	8435	9673	10.01	8615	9079	8798	8819	8753	8446	8665	7151	7974	9.93	8987	9505	8347	8009	9.01	8812	7879	8207	9323	9186	8922	9113	9015	9375	8957	8812	9799	9084	8749	9125	7767	8448	8678	8874	9.84	9583	9144	8939	9284
SAA1	1405	5.21	4839	10.28	3636	5656	2181	8666	9884	4891	5565	7851	0.4508	4123	7268	6427	6754	6.75	5764	6807	5813	6627	4344	4009	7456	2445	7445	0.4011	4392	5535	6948	6.22	5613	5883	7388	6.54	4441	8588	7283	4333	6153	6577	7061	10.61	7399	3757	6205	10.88	4826
HSPA1A	17.53	18.9	13.42	14.29	15.93	14.52	14.13	14.22	13.48	14.6	13.72	14.29	13.27	14.11	14.44	16.03	14.8	14.84	14.18	13.38	16.56	13.92	14.29	14.25	13.92	16.37	13.35	13.28	12.27	13.39	14.59	12.93	14.7	14.09	13.75	13.47	14.82	14	15.1	14.44	14.54	14.75	14.48	13.73	14.86	13.51	12.69	14.2	13.01
HSPA1B	14.57	16.36	10.57	11.76	13.76	11.36	11.4	11.95	10.93	12.52	10.91	11.72	11.28	11.44	11.49	12.93	12.3	12.94	11.7	10.83	13.88	11.5	11.79	11.39	11.35	14.03	11.03	11.11	9767	11.13	11.97	10.53	11.69	11.46	11.12	10.55	11.83	11.66	12.67	11.99	12.04	11.73	11.71	11.33	12.17	10.97	10.04	11.21	10.05
GLI2	6232	4.03	8012	5777	6068	7305	6909	5077	7053	6283	7707	5.34	6535	7082	7307	7641	5153	6219	5387	7884	6525	6308	6155	7499	5571	6958	4905	5981	6004	7183	5.6	7283	6424	5854	5253	8071	6105	5496	5186	6609	4412	5691	6345	6529	5.93	6526	6262	6.54	6846
GLI3	8883	8811	9539	9441	8516	9285	9.52	7937	9.11	9388	9496	7835	8136	9184	9443	8828	8114	6988	8017	9863	8925	8169	7912	9198	8141	9258	6981	9101	8067	8085	8381	9163	8088	8.43	9301	9594	8983	7799	8161	9097	6679	8224	8084	8972	7565	8416	8822	8986	8333
MYB	6537	7413	7.11	7566	7176	7146	7168	6525	7581	8145	6362	5695	6378	8095	6407	8023	7514	6871	7766	7967	6696	6077	7552	6192	6.33	7.8	5892	6248	6752	7866	6934	8.38	6.2	7107	2537	6439	5439	6382	7845	7.53	7601	8494	6.68	7948	7478	6667	8141	8316	7251
RARA	10.16	9763	10.28	9.98	10.01	9876	9947	10.22	9.34	9622	9696	8983	9946	9.67	10.17	10.61	9582	10.73	9821	10.15	9475	10.29	9559	10.34	10.06	10.6	9159	8981	9409	9746	9344	9088	10.1	8936	9924	10.16	9754	10.02	10.21	10.32	8758	9427	9211	9801	9681	9531	8802	9724	9437
RRAS	10.12	10.34	10.66	10.39	11.15	10.74	10.7	9556	10.26	10.35	11.1	11.59	9.75	9792	11.75	11.17	9446	11.56	10.4	10.62	10.61	11.06	11.56	12.04	10.17	11.58	8819	9593	10.67	10.37	10.51	9604	10.72	10.85	11.15	11.67	10.88	11.64	9989	10.13	11.38	10.15	10.29	10.05	10.09	9405	9509	10.19	10.57
BCL2	10.25	10.85	10.66	11.07	10.48	9906	10.97	8691	10.62	10.29	9622	10.18	8765	9476	10.25	9024	8606	8678	8523	10.88	10.08	9528	9707	10.36	8.8	10.98	7608	11.12	9821	9132	9536	9895	8.96	9331	10.73	10.06	9919	9716	8745	10.22	8109	9345	9829	9871	9109	8473	8871	10.26	9756
SPP1	5855	7243	6596	7858	4988	6641	7692	8997	10.13	6.61	6642	8051	8105	8431	7642	8987	7211	7526	7122	9911	7589	8.38	7956	6809	8174	8994	8116	5033	10.31	11.48	6951	8373	9303	4094	9153	11.39	6.29	8.57	8917	9468	7662	8278	7099	8635	8047	8142	8606	4785	8295
PTPRF	13.94	14.01	14.08	14.09	13.94	14.21	14.12	13.2	14.11	14.19	13.88	13.45	13.79	14.59	13.76	13	14.2	11.37	13.55	13.83	14.31	13.38	13.19	13.55	13.92	13.6	13.94	14.6	13.56	12.93	14.31	14.24	13.9	13.89	13.91	13.46	13.38	13.01	13.65	13.88	13	14.5	14.2	13.97	13.57	14.45	13.9	14.4	13.92
PRKAR1A	12.58	12.28	12.54	12.7	12.51	12.14	12.52	12.26	12.65	12.54	12.78	11.75	12.69	12.46	12.62	12.22	11.77	12.02	11.81	12.78	12.02	11.84	11.13	12.08	12.26	12.28	12.65	12.98	12.6	11.65	11.94	12.4	12.11	12.4	12.94	12.63	10.91	10.62	11.7	12.48	10.69	12.06	12.17	12.41	11.98	11.9	12.66	12.31	12.48
KIT	7894	7209	9.12	7396	7276	8596	9438	6.46	8321	8053	8755	6463	8182	8195	8114	8008	6425	8346	6.85	9454	8177	7242	6815	8.29	6675	9.28	6811	8.15	7894	7992	7009	8523	7017	6674	10.04	9539	6869	6642	6567	8219	5632	6621	6232	7625	8455	7426	8779	7681	8625
CD28	4161	3634	5699	5654	3412	5.68	4049	6194	5309	6.01	4781	1344	4453	4465	3245	7774	5.02	5763	4.51	5869	3934	5802	3178	3718	3716	3306	3454	5382	7.09	5696	4021	4668	5116	3801	2831	5609	4441	6217	3647	6.57	5104	4322	4.77	5.14	6515	4297	5.5	5.59	5029
HSPD1	12.86	13.52	11.33	12.1	12.45	11.91	12.11	13.03	12.04	12.16	11.92	11.83	13.12	12.52	12.2	12.69	12.55	12.87	12.74	11.77	12.3	12.34	12.69	12.48	12.55	12.15	12.66	12.27	12	12.93	12.33	12.62	12.39	12.56	12.1	11.91	13.45	12.47	13.53	12.86	12.27	12.73	12.62	12.89	12.66	12.6	12.85	11.78	12.13
IRF1	10.7	11.26	9878	11.83	10.58	10.19	9.42	11.71	9883	12.61	9851	9601	9489	9394	9767	11.02	11.87	11.76	10.94	10.38	9168	11.33	9914	9094	9512	10.42	10.04	9468	10.51	9448	9545	8934	10.37	9284	8495	10.19	10.92	10.47	11.59	10.62	10.04	8989	9137	10.28	10.7	8984	8754	10.06	9504
HAPLN1	4128	2.82	6197	0.7574	0.4407	3859	4745	0.9239	4844	0.5922	7201	0.5975	5638	4928	0	7259	0.7039	5763	3014	5853	0.8255	1924	2.67	3891	1008	3623	1237	1958	6117	5373	4047	4615	1389	1361	0	6944	0	1645	1612	4102	0	1781	0.4436	3395	3064	4522	3827	1247	5029
HSPA5	13.93	14.95	13.46	13.7	14.33	14.23	13.75	13.72	13.74	13.56	14.4	14.24	14.24	13.99	14.06	14.29	14.76	13.76	13.8	13.55	13.79	13.89	13.87	14.05	14.01	13.43	13.98	13.48	13.7	13.55	14.17	13.55	14.27	14.11	14.21	13.55	13.26	13.71	14.11	14.14	14.12	14.04	13.89	14.23	13.74	14.3	15.11	13.89	14.2
LAMC1	12.14	11.21	12.31	11.38	12.22	11.77	11.9	11.11	11.54	11.62	12.53	10.85	13.13	11.92	12.76	12	11.09	11.1	11.5	12.17	11.48	11.32	10.48	12.37	11.54	12.01	13.6	11.58	10.59	11.89	10.98	12.69	11.48	10.96	12.19	12	11	10.97	11.15	11.4	9358	11.66	11.31	12	10.85	12.19	12.57	11.28	11.3
HSPA8	15.27	15.38	13.8	14.22	14.45	14.39	14.18	14.99	14.24	14.35	14.18	14.16	15.26	14.39	14.2	13.91	14.81	12.8	13.6	13.92	14.81	14.84	14.11	13.06	14.14	14	14.74	14.32	14.53	13.98	14.67	14.41	14.52	14.5	13.83	14.19	12.82	14.16	14.72	14.83	14.5	14.08	14.45	14.05	14.37	13.92	14.54	14.04	14.65
ITGAM	5915	6126	7.13	8202	5817	7.03	6938	7344	7458	6311	7248	6584	6623	6787	6299	6934	5816	6129	5876	8509	6297	7684	5881	5.89	5887	6.09	5573	5559	7094	7127	6428	7379	6936	4869	6234	7701	5559	7424	5863	7479	6101	6.67	6395	6795	7669	6745	6792	8081	7266
RALA	9653	9414	9.27	9661	9446	9509	9557	9.75	9582	9499	9623	9255	9429	9756	9476	9487	9542	9376	9679	9446	9269	9526	9.71	9403	9628	9726	9511	9.76	9924	10.7	9357	9871	9567	9642	9556	9727	9.55	9881	9747	9.52	9237	9826	9689	9733	9587	9326	9699	9312	9655
BCR	10.8	10.42	11.07	10.46	10.56	10.72	10.53	10.58	10.46	10.45	10.48	10.86	10.82	10.48	10.79	10.46	10.54	10.58	10.66	10.67	10.38	10.45	10.93	10.39	10.59	10.56	11.12	10.34	9.73	10.63	10.46	10.65	10.44	10.23	11.16	10.26	10.35	11.07	10.28	10.29	11.34	10.3	10.41	10.43	10.37	10.77	10.22	10.59	10.16
SCGB1A1	12.03	12.99	12.29	7769	10.87	10.69	12.54	8651	10.03	10.81	9403	8569	10.72	8587	10.79	10.23	6843	10.73	9317	11.92	9638	9712	11.45	10.4	6.4	11.61	5913	7886	11.88	2918	10.7	7.99	5905	12.93	6183	9634	7227	6497	6749	9612	8651	7342	7377	6.61	8729	2737	7.63	7953	11.55
IGF2R	11.45	11.55	12.08	11.85	10.66	12.34	12.01	11.55	12.37	11.9	12.52	10.77	12.54	12.57	11.32	11.55	12.23	10.57	10.97	12.15	11.86	11.23	10.34	11.09	11.66	10.89	12.27	12.03	10.94	10.76	12.08	12.73	12.16	11.62	11.49	11.37	11.24	11.02	11.7	11.61	10.16	12.34	12.23	11.99	11.65	12.05	13.01	12.18	11.64
SRF	11.26	10.71	11.7	11.81	11.32	12	11.11	11.02	10.91	12.05	11.82	10.73	10.9	10.96	12.23	11.59	11.65	11.63	10.61	11.51	11.29	11.28	11.36	11.96	10.96	11.63	10.7	10.55	10.64	10.82	10.85	10.81	11.25	10.97	11.43	11.87	11.34	10.84	11.49	11.44	11.16	10.51	10.75	11.06	10.47	11.13	10.4	10.87	10.74
PABPC1	14.98	14.95	14.56	15.1	14.71	14.83	14.64	14.57	14.5	14.92	14.32	14.01	14.93	15.51	14.38	15.11	14.87	14.22	15.11	14.6	14.57	14.38	14.15	14.75	14.82	15.03	14.75	14.75	14.27	15.29	14.47	15.25	15.05	14.7	14.3	14.62	15.11	14.58	15.22	14.67	13.99	14.97	14.66	15.1	15.11	15.89	14.95	14.54	14.19
COL6A1	11.55	10.43	13.61	11.23	12.15	12.09	11.96	11.62	11.86	11.87	12.95	12.34	12.97	11.96	14.07	13.24	11.13	12.7	10.65	12.81	12.03	11.97	12.61	13.37	11.11	12.69	10.82	10.65	11.01	12.16	11.57	11.8	12.04	10.86	11.89	12.95	11.99	11.9	11.11	12.4	11.02	11.83	11.62	12.01	11.73	11.38	11.43	10.83	11.23
COL6A2	12.18	11.01	14.53	11.95	12.48	13.5	12.92	12.8	12.65	12.61	14.18	13.8	13.81	13.07	14.97	14.56	12.23	13.32	12.07	13.66	12.89	13.43	14.1	14.5	12.6	13.58	12.56	11.55	11.96	13.61	12.51	12.66	13.3	12.25	13.3	14.16	12.92	12.94	12.06	12.97	12.74	13.03	12.62	12.86	13.08	12.4	12.83	11.93	12.23
COL6A3	11.77	8.59	12.97	11.21	11.66	11.7	11.74	11.56	11.63	11.87	13.33	10.2	12.7	12.29	13.36	13.41	10.9	12.13	10.38	12.8	11.99	11.37	10.41	13.05	11.33	11.88	10.42	11.07	10.6	12.51	10.55	12.54	12.68	10.79	12.7	12.9	11.05	10.78	11.02	11.66	9217	12.22	11.34	12.5	11.39	12.27	12.14	11.19	11.02
BMP2	8106	7963	8956	7851	6867	7129	7815	5307	7214	7103	7055	5751	6266	6699	7.51	8322	6905	6558	5185	8203	6075	6267	6501	6311	5936	7265	7161	5974	7556	5102	6468	6878	6269	6529	5998	7.46	7074	5759	5.48	7292	5104	4456	5418	6411	6499	3968	6518	7296	7085
BMP4	7102	7662	8663	7889	8527	9012	8413	5933	8849	8442	8472	6926	7477	8911	8338	8868	7.07	7982	6843	9756	8019	7061	7975	8846	7383	9024	5946	7678	8.33	9839	7939	8.04	7675	7708	6835	9.38	8565	8298	6166	8.28	6127	7257	7969	8.63	8101	7584	7805	7635	8748
ACTN1	12.34	11.29	13.1	12.52	12.88	13.37	13.01	13.2	12.65	13.09	13.66	11.82	11.99	12.45	14.32	13.53	11.88	12.14	11.89	13.15	13.53	12.37	11.69	14.2	12.78	13.35	11.73	12.55	11.95	12.75	12.18	12.62	12.77	12.54	13.47	13.62	12.36	12.2	12.62	12.71	11.09	12.51	12.36	12.83	12.19	12.27	12.45	12.88	12.59
CDH1	13.49	13.96	13.51	13.67	13.56	13.72	13.97	13.65	13.73	13.49	13.56	13.07	13.08	13.89	12.9	13.35	13.55	13.12	14.14	13.36	13.75	12.86	12.6	13.43	13.97	13.16	12.98	14.21	13.42	12.75	13.83	13.5	13.27	14.21	13.51	12.89	12.93	12.44	13	13.38	12.49	13.8	13.55	13.93	12.93	14.02	14.33	13.98	13.6
SRC	11.4	11.54	11.35	10.98	11.06	11.17	10.87	12.24	10.91	11.18	10.85	10.82	10.81	10.73	11.19	10.97	10.86	12.11	10.9	11.06	11.5	10.91	10.77	11.16	11.53	11.42	11.58	10.98	10.46	10.48	11.45	11.02	11.09	10.82	11.05	10.95	11.4	10.91	11.44	11.4	10.8	10.77	11.05	11.3	11.74	10.48	10.97	11.42	10.92
IL7	5251	5.66	5751	6396	7.19	5879	5331	5692	6171	6027	5468	5206	3936	5.29	5.97	5148	4842	4869	4115	6.61	5588	5306	3339	4614	5082	5414	5351	5743	6.6	4582	4.92	5691	4989	5343	5001	5865	5125	4.37	5557	5879	3682	5051	4543	5329	6026	5206	6172	6084	6093
CCL4	6618	6769	8036	8071	7253	6992	6.87	7121	6.76	8264	7337	4791	7297	6915	6055	5898	8005	6865	4977	6077	4768	7.66	6348	6.51	4923	6037	3622	4531	7068	5055	5.98	6339	7554	5967	4743	7.91	7839	5716	6107	6399	6799	4578	4671	6298	6412	3878	5921	5067	5497
MYF5	0	0.4401	0	0	0	0	0	0	0	0	0	0	0	0	0.5568	0	0	0	0	0	0	0	0	0	0	0	0	0	0	0	0	0	0.4047	3.01	0	0	0	0	0	0	0.5086	0	0	0	0	0.3059	0	0	0
CYBA	9342	9468	10.02	9906	9797	8986	9304	9.64	9334	9285	8861	10.63	9017	8278	9686	9691	8862	9613	8804	9971	8.71	10.55	11.01	9842	9.15	9.93	8153	8232	10.03	9381	8972	8607	9148	9333	10.91	9967	10.29	10.98	8764	9801	10.08	8851	8728	9169	10.24	7322	7.78	9857	9135
CCL2	8851	8493	9316	11.27	10.29	9011	7817	10.96	8611	12.1	11.09	6584	9476	8972	10.66	9858	10.94	12.28	11.16	10.03	7.76	11.8	8087	9092	11.08	9219	9419	7.08	10.75	9364	8751	8152	10.03	7358	7482	10.92	9822	10.78	11.63	10.42	9466	7002	8617	10.26	9907	7411	7.14	8658	8149
CCL5	9206	10.15	9.59	9902	9661	9	8689	9354	9.14	8463	7821	8501	7616	7888	7565	9175	7944	10.45	9152	9011	7763	10.05	9395	8459	7755	9243	6782	8132	9606	8.47	8796	8548	8095	9416	6982	9543	9373	10.24	7959	9113	9695	8018	7668	9547	10.02	6902	8045	8329	8686
NCAM1	8072	6691	9681	8.39	9465	9196	9708	6392	9535	7454	10.23	8557	6266	8932	11.33	9486	6526	8515	6187	10.07	7943	6444	9524	9994	7072	9908	4815	6504	8231	7.8	8135	8138	7.45	8408	8897	10.11	6833	6908	6536	9116	6315	6718	7.69	7877	6465	8075	7614	6846	8213
ICAM2	8.03	6734	8078	7225	6775	7586	7147	7286	7221	7236	7492	7281	7739	6956	7.84	8437	7011	8925	7033	7714	6357	8758	8825	7653	6473	6951	7083	5502	8084	7962	7139	6708	7602	7675	6843	8347	7937	8794	6893	7.84	8727	7012	6926	7.69	8018	6583	6639	6015	7695
VCAN	10.36	6829	10.81	8171	5853	10.06	8573	9713	9.12	7887	10.8	6731	10.38	10.37	8938	10.24	7265	8884	7752	10.31	7609	9.08	7759	8799	8536	7.55	7.17	8451	8143	12.29	7156	9718	9417	9614	9365	10.38	7245	8479	8222	8745	6162	8.88	8455	9247	8729	10.09	9512	7421	8643
ITGA4	6805	6425	7931	8151	5063	7156	7343	7999	8243	7492	7639	3981	7196	7441	5505	7.22	6252	5183	5139	8906	6479	6669	5345	5162	5056	6086	5906	7495	8.79	7886	6901	7716	7108	5044	5447	8514	6.02	5782	5885	7612	4288	6177	6738	7405	8301	6817	7924	7.12	8311
EEF2	15.56	15.72	15.68	15.85	15.77	16.54	16.1	16.23	15.63	15.9	15.79	15.86	17.21	16.31	16.1	16.51	16.12	15.61	16.66	15.84	16.21	16.37	15.93	16.03	16.43	15.91	17.04	15.83	15.21	15.86	16.16	16.88	16.42	16.04	15.9	16.07	15.77	16.42	16.7	16.2	16.46	16.68	16.45	16.78	16.44	17.06	16.32	16.18	15.48
CEACAM1	11.82	10.84	9759	11.67	10.3	10.08	9816	11.22	10.38	11.21	10.31	9105	9828	9661	9865	11.31	10.23	8844	10.3	10.32	10.42	10.16	8428	9921	10.35	9903	8832	9.39	10.06	9344	9206	9747	9.64	9564	7588	10.07	9915	9091	10.71	10.8	7677	10.34	9286	11.21	9621	11.5	10.95	10.97	9675
HLA-E	13.23	13.66	12.97	13.12	12.09	12.91	12.94	13.65	12.96	13.01	12.75	12.52	12.55	12.46	12.37	13.28	12.33	12.22	12.37	13.21	12.33	13.31	11.82	12.23	12.38	12.6	11.48	12.81	13.58	11.86	12.87	12.02	12.66	12.47	12.99	13.32	12.99	13.24	11.51	12.87	11.76	12.36	12.11	13.08	13.36	12.11	12.01	12.73	13.24
LCP1	11.98	13.66	12.63	12.94	12.47	13.12	13.16	13.15	13.26	13.03	13	13.4	12.26	13.71	12.15	13.5	13.26	11.24	12.71	12.89	13.68	13.4	12.29	12.84	13.82	12.17	13.23	13.95	13.74	10.55	13.47	12.66	13.08	13.35	11.16	13.32	12.44	13.57	12.69	12.75	12.39	13.7	12.91	13.2	13.34	13.63	13.41	13.2	13.61
PRKAR2A	8623	7892	8637	8547	6.99	8793	8702	7986	9212	8759	9342	5907	8392	9399	8183	8128	8659	5822	6397	9316	8378	5913	4853	6742	7693	7402	8249	8851	9.3	5585	8523	9323	8452	7555	8.6	9157	6438	5496	7885	8126	4874	8.45	9184	8346	7658	9818	9401	8739	9203
CD59	13.75	12.98	12.88	13.62	13.16	13.04	13.23	13.09	13.08	13.16	13.01	12.99	13.07	12.52	13.2	13.29	12.64	13.36	12.89	13.23	12.87	13.13	13.21	13.19	13.11	13.4	12	12.54	13.45	13.11	12.66	12.56	12.63	13.16	14.09	13.53	12.71	13.53	12.87	12.85	12.87	12.87	12.78	13.15	12.8	12.43	12.81	13.23	13.21
SELL	7094	6523	6763	6969	5112	6933	7307	6489	6825	6325	6839	4791	5.75	6592	5.47	7011	5322	9188	5779	8133	6282	7615	5076	7219	5125	7413	4643	5859	8827	5633	6034	6986	6129	5902	4429	8086	6722	7502	5296	6435	5739	5963	5.03	6913	8704	5.05	7041	5708	6743
CD99	10.08	11.78	10.84	12.12	12.34	12.02	12.19	11.82	11.93	12.18	11.93	13.22	12.58	12.06	12.72	12.15	11.24	12.34	11.36	11.86	11.05	12.56	12.51	12.58	11.74	12.1	11.63	11.52	12.23	11.37	12.39	10.99	12.48	12.54	11.24	11.29	12.08	13.21	11.48	12.22	12.53	12.69	12.55	11.47	12.1	11.01	11.25	12.27	11.93
IRF2	10.12	10.24	9936	10.2	10.38	9862	9.94	9565	10.1	9817	9604	8897	9273	9826	9925	10.08	9.5	9261	9943	10.02	9888	9231	8.5	10.17	9876	10.46	9348	10.12	9864	9583	9733	9846	9427	10.02	10.11	9906	10.09	9.01	9411	9794	7733	9393	9.57	10.03	9813	9733	9568	9983	9973
ATP1B2	6.01	4884	7794	6862	7935	7.12	6942	5717	6016	7127	7345	5666	6.79	7239	8207	8493	5954	7501	5835	7.48	6839	6825	6.1	8035	5811	8.21	4883	6319	6267	4582	5889	6736	7194	5911	8508	8271	6324	6227	6277	7195	5068	6.67	6.19	7586	6709	6681	6545	6197	5569
NID1	10.25	7401	11.12	9642	9435	10.24	10.24	9871	9.8	10.23	11.54	8242	10.82	10.03	11.44	11.28	8651	10.37	8453	10.99	10.22	9671	7939	10.92	9425	10.71	9186	9493	8997	9646	8756	10.46	10.56	9.21	11.21	10.81	8977	8459	9269	9881	6655	10.02	9684	10.36	9329	9.89	10.4	9555	9497
PLA2G2A	10.71	14.87	10.42	15.04	15.2	9899	13.24	12.7	14.88	13.42	12.37	17.1	14.44	13.05	14.01	14.34	12.24	11.23	17.85	10.92	15.79	12.15	14.64	12.17	13.84	15.94	15.79	14.8	12.4	6947	13.73	13.89	14.94	13.89	7604	14.15	14.57	12.28	14.85	14.22	12.83	13.42	12.6	15.18	12.63	13.62	14.28	11.8	11.84
HSP90B1	13.89	14.26	13.77	13.95	14.28	14.35	13.8	14.1	14.31	13.96	14.81	14.94	14.98	14.55	14.18	14.02	14.93	13.86	14.48	14.08	14.52	14.35	14.89	14.28	14.62	13.73	14.44	13.87	14.23	14.18	14.77	14.22	14.9	14.34	15.08	13.97	14.07	14.3	14.92	14.24	15.14	14.88	14.45	14.65	14.43	15.32	16	14.21	14.49
GP9	0	1806	1758	0.4278	1051	0	0.4368	0.5347	0.6688	0.8166	0	2352	1071	0.6959	0.5568	0	1.53	0	0.627	0.9808	1347	0.6406	1653	0.8786	0.5906	0.4897	0.5385	0	1585	0	0.6757	0.3843	0.7205	0	0.523	1368	0.9574	0	0	1829	0	0.5725	0.7824	1335	0	0	0.8885	0.5439	0.7306
IDO1	3331	7149	4909	7031	3717	5376	5184	8422	7327	4879	5424	5666	4697	4504	4377	6071	6702	7003	7565	6782	4316	8666	4798	5075	4225	4611	5881	7.11	8938	8325	7143	5.42	6025	4.47	8904	5283	6959	5759	3739	6414	5795	5249	4403	8106	8.23	4863	5.88	4371	7003
ETS1	11.43	10.35	11.73	10.72	9137	10.54	10.38	11.02	10.68	10.42	10.66	7727	10.81	10.33	9795	11.19	9.81	10.59	9132	11.31	9562	10.42	8481	9249	9137	10.01	9833	9739	10.55	9319	9867	10.7	10.49	9453	9972	10.85	9084	8998	9595	10.3	8341	9923	9.7	10.46	10.85	10.06	10.72	9716	10.34
JUP	13.44	13.64	13.21	13.26	13.36	13.18	13.05	12.93	12.59	13.06	12.14	13.3	13.02	12.95	12.47	13.2	12.97	12.81	13.23	12.56	12.71	13.14	13.55	12.81	13.08	13.31	13.12	12.73	11.86	12.52	12.96	12.72	13	13.07	12.92	12.13	13.36	13.19	12.87	13.06	13.65	13.06	12.64	12.86	12.74	12.43	12.35	13.3	12.26
LIF	8896	6011	9.15	8783	6165	7791	5942	7387	5948	8717	6861	4321	6.58	7.19	7514	7203	8237	10.01	6897	8273	4886	7544	6219	6737	6339	5255	7062	3648	7872	5429	5751	6.62	8.16	4569	5998	8745	6569	6196	7681	8.18	6292	5677	5195	5722	6873	5796	5.76	6414	6288
PVR	9704	9794	9678	9456	10.08	9866	9934	11.19	9498	10.18	9675	10.06	10.53	10.02	9.51	9884	10.31	10.91	10.14	9554	9822	10.12	10.25	10.16	10.55	9878	10.75	9886	9.64	9725	10.65	10.31	10.22	10.14	9183	9329	10.01	10.64	10.82	10.38	10.63	10.25	10.73	9929	10.29	10.32	10.11	9563	9878
RAC2	7736	8811	8.92	8699	8109	8271	8.35	8607	8.57	8186	8011	7323	7613	7523	7.45	8535	7015	8597	7.54	9.12	7665	9328	7601	8163	7357	8009	6896	7066	9409	7793	7707	8257	7907	7719	7571	9232	8862	10.02	7245	8606	7321	7509	7236	8785	9845	6947	7783	8216	8388
B4GALT1	12.68	12.22	12.21	12.34	12.17	11.94	11.92	11.61	11.95	12.39	12.22	12.05	11.38	11.8	11.69	12.73	11.8	11.5	11.5	11.7	12.25	11.83	11.19	12.08	12.43	11.66	11.38	11.89	11.72	11.96	11.96	11.44	11.99	12.19	12.25	11.48	11.29	11.07	12.04	11.8	11.18	12.11	12.26	11.9	11.73	11.78	12.35	12.23	11.93
EZR	14.17	13.84	14.01	13.39	13.23	13.11	13.29	13.85	12.95	13.47	12.72	13.02	13.66	12.87	13.22	13.38	13.5	13.93	13.04	13.35	13.1	12.85	13.26	12.94	13.09	13.35	12.55	13.13	13.05	10.68	13.11	12.68	13.02	13.01	13.76	12.66	12.39	12.67	13.6	12.79	13.08	13.17	13.09	12.77	12.65	11.84	12.64	12.67	12.65
VAV1	7.46	7437	7896	7983	7344	7.03	7448	7448	7597	7111	6668	8299	5994	6712	7712	6.26	5832	6063	5876	8063	8429	7688	7493	6673	6689	7343	4354	7156	7694	5.84	7029	6874	6731	6791	6385	7917	7521	7959	5746	7327	6993	6355	6071	7069	7787	5668	6065	7034	7321
CD46	13.01	12.88	12.77	12.95	13.16	12.77	12.7	12.61	13.29	13.13	12.79	12.27	11.91	13.27	12.29	12.34	12.79	11.25	12.5	12.82	13.39	12.29	11.46	12.63	12.91	12.47	13.27	13.27	14.13	12.51	12.76	12.85	12.61	13.07	13.12	12.68	11.94	11.46	12.68	12.53	11.19	12.98	12.87	12.6	12.69	13.12	13.73	13.06	13.74
VEGFA	13.63	13.26	13.14	12.7	14.13	12.42	13.62	12.59	13.25	13.92	12.96	13.21	12.9	12.48	12.9	11.1	13.94	10.7	11.55	11.63	13.05	13.16	12.89	14.02	12.88	10.91	13.86	12.59	13.06	11.06	12.59	13.03	14.01	13.36	9907	11.89	12.26	9537	11.55	13	12.08	13.11	13.33	10.09	12.54	10.93	12.76	13.09	13.93
CD1D	4638	5049	5439	6.13	5407	5103	6038	4871	5608	5636	5.3	5014	4.87	4315	3565	5236	3293	5545	4.9	5752	5175	6329	5509	5212	4476	5344	4322	4268	5.94	5447	4801	4992	5033	4026	3148	5.96	5822	6076	4287	5642	5.19	5093	5394	5669	6149	4208	4863	5886	5977
RPS2	13.42	13.86	12.64	13.62	14.11	13.43	13.67	14.22	12.91	13.6	12.74	14.31	14.2	12.97	13.39	14.34	13.76	14.81	14.87	12.89	13.72	14.55	14.88	14.09	14.38	14.22	14.51	13.07	13	14.39	13.43	13.87	13.74	14.16	12.62	13.23	14.78	15.14	14.62	13.93	15.11	13.96	13.66	14.5	14.06	14.14	13.45	13.4	12.73
RAG1	4662	4553	5306	5541	5333	4.83	5098	3032	5382	5032	4976	2732	2.78	5	4007	2769	3293	3316	1896	5411	5012	3.23	3414	3521	3539	5743	3.12	7.83	4838	5079	4754	5019	4183	4496	5.04	5223	4088	3402	2757	4706	1638	3609	4134	4621	4198	4332	4775	4964	4739
DSP	13.78	13.4	13.47	13.71	12.99	13.35	13.56	12.75	13.41	13.6	13.16	12.06	12.63	14.05	12.59	13.29	13.39	11.63	12.44	13.25	13.47	12.49	11.59	12.8	13.16	12.94	12.6	14.18	12.31	14.22	13.09	14.02	13.13	13.35	12.9	12.75	12.66	11.97	12.83	13.11	11.43	13.24	13.49	13.31	12.69	13.91	13.68	13.39	12.64
MUC1	10.22	10.35	10.96	10.43	8881	7945	9427	9331	8753	10.32	8561	9347	9623	9762	8315	10.42	8654	8.61	8.61	9539	8699	9629	10.56	9.46	9295	8912	8469	7052	8161	7603	8326	8544	8.98	9311	11.07	8452	10.81	10.12	10.63	9922	10.5	9258	9154	9343	9318	6362	7867	9498	7903
GATA1	0	0.4401	1947	1619	0.7778	0	1043	0	1307	1473	1468	2028	1835	0.9485	2103	2047	0.7039	2863	1063	1971	0.8255	1421	2404	1631	0.5906	1146	1237	0.7146	1585	0	0.923	0.9377	1389	0	1458	1573	0.9574	2659	1612	1829	0.5086	0.5725	0.7824	1335	2763	0.5582	0.5116	1718	1574
TIMP2	11.88	10.51	13.34	12.11	12.03	12.98	12.89	11.65	12.84	12.33	13.32	11.94	12.71	12.85	13.65	13.48	11.19	12.41	11.32	13.76	12.26	12.35	12.09	13.44	11.74	13.02	11.05	11.53	12.4	13.92	11.82	12.46	12.64	12.01	13.04	13.68	11.78	12.16	11.62	12.67	11.25	12.32	12.11	12.68	11.92	12.19	12.5	11.76	12.61
ALOX15	2668	3202	3521	2705	3026	0.8833	3.35	1.23	2359	4043	2.93	2.49	8942	7605	4532	2453	2985	0	5185	3549	3934	6803	2787	3293	7379	2082	5127	6578	2888	7.49	2197	7134	3698	0.4772	7106	1913	4916	5815	0.8664	6646	2264	4052	4192	7093	1037	2025	7614	1718	4155
CD44	13.47	12.92	12.34	12.95	12.43	12.6	12.05	13.01	12.52	12.71	12.35	11.98	11.08	11.91	12.8	13.14	12.62	11.56	11.54	12.58	12.08	12.27	11.51	12.17	12.28	12.54	11.35	12.13	11.85	11.47	11.95	11.91	11.76	12.45	12.02	12.55	11.77	11.41	12.41	12.28	12.22	12.32	12.92	12.29	12.27	12.02	11.99	12.07	12.14
SELP	9571	6594	9601	7842	5732	8726	8546	8153	8421	7996	9328	6237	8.6	8399	7931	9081	7.73	8502	7116	9017	7207	9126	7663	7306	7357	7672	6696	6539	8.52	5726	8103	8258	8774	7143	7249	9786	7476	8827	7985	8246	8218	8189	8402	8537	9053	7935	7861	7543	8399
ACAN	3331	1.05	4863	2262	3935	3303	3537	3032	3342	4679	4.04	1834	4353	4017	5.97	4889	3763	2454	2093	5475	4344	5886	2404	5395	4374	2445	1491	3364	3907	5191	2099	4294	6226	4158	3946	3.89	3244	3837	5779	4634	4.81	5072	4609	4598	3768	3137	2506	2221	3045
ITGB4	13.25	12.48	12.85	12.64	12.01	11.83	12.54	12.02	11.98	12.18	11.24	11.9	10.64	10.97	12.17	11.69	11.03	9465	10.81	12.22	11.86	12.01	11.52	11.55	11.84	11.84	9678	11.28	10.54	10.07	11.26	11.29	11.01	11.06	12.03	11.43	12.14	11.74	10.88	12.2	10.68	10.68	10.79	11.72	11.14	10.16	10.16	12.02	11.11
SPN	6563	7108	7919	8434	6503	7057	6533	7254	7394	7004	6866	5666	5994	6907	5588	6434	6184	7018	6052	8174	6075	7268	5868	5.92	5731	5641	5444	6798	7565	5552	6.77	7183	6573	5985	4856	7551	7272	7728	5655	7.38	5693	6397	6032	7.62	8163	6511	6954	7271	7184
PDGFRA	7.86	8165	10.21	8867	6786	9219	9433	8396	10.06	8.46	9934	7473	10.23	9712	9872	10.54	7482	9637	7059	11.11	8078	8512	8211	8787	7707	8592	7501	8774	9398	10.71	8497	9153	9008	7393	9426	10.35	7058	8238	8028	9.33	6697	8423	8.2	9342	9111	9313	10.05	8185	9463
PECAM1	9939	8.45	9654	8894	7249	8.9	9022	8899	9099	8627	9038	8133	9322	8724	9617	9897	8318	11.09	8285	9578	7.76	10.28	9.63	9092	8472	8541	9	6802	9217	9.74	8646	9225	9401	8982	8322	9833	9504	10.32	8461	9006	9719	8659	8981	9.61	9661	8483	8296	8085	9642
NCK1	9372	9395	8821	10.1	9142	8736	9073	8987	9508	9087	9.06	8.22	9083	9295	8.95	9383	8945	8869	8919	9.52	8929	8854	7246	8814	8959	9172	9137	9157	9986	8832	8835	9381	9008	9172	8811	9339	8847	7.87	8856	9146	6826	9043	9.12	9317	9244	9423	9669	9437	9511
CTLA4	3908	3257	4425	5464	3312	3728	2735	5.8	4531	5009	3088	2732	3629	2718	2389	4.17	4357	6877	3433	3933	3187	6329	3902	3164	2715	2334	4477	2689	5672	9947	4801	4128	3836	2409	1458	2948	5086	4.67	3739	4029	6136	3609	3036	4.43	6212	3097	3.87	3528	3985
EPCAM	11.02	11.51	10.61	11.26	11.04	11.54	11.2	12.64	10.99	11.26	11.1	11.25	12.57	11.97	10.18	12.11	12.39	11.65	13.65	11.16	11.67	11.95	12.35	11.54	12.41	11.14	13.22	11.18	11.74	13.74	11.68	12.14	12.29	12.13	11.8	10.54	11.78	11.77	12.63	11.29	12.43	12.11	11.71	12.63	12.19	13.01	13.27	11.44	11.21
PRLR	5645	5429	6323	6179	5622	7.18	7015	8116	7485	7228	7641	5591	6002	8545	6055	6813	5075	7591	6856	9319	6785	5787	8233	6977	7583	7697	9069	7.14	8712	4824	8166	8.9	6985	5893	12.01	7703	6254	5672	7287	7.35	7031	5423	7685	6886	7.52	8058	8282	7024	7783
CRISP2	5621	6357	4976	1619	7187	3901	4837	2.95	4.13	3446	4321	6176	5222	3023	6055	5202	2736	0	3869	3701	1.73	1421	5881	1631	3408	3306	2208	4551	6125	2271	6676	2765	1844	3801	6.79	0.4804	1936	0.6151	2102	4841	2.79	2669	1057	2746	3235	5721	0.5116	2798	5907
SELE	13.14	8535	11.95	11.27	8332	10.9	9918	8312	8679	11.24	12.25	4818	8207	10.54	9122	9394	11.14	8215	6488	11.47	3859	7964	8621	7083	7869	9767	7598	4803	11.15	4291	10.27	7248	10.07	6063	9428	11.87	7734	8.36	8768	10.1	8092	5731	7029	6881	9005	7307	7.63	8209	7502
FER	6389	4151	5897	5476	4701	5317	5638	5133	6571	6065	6811	4428	5481	5866	5408	5713	4601	4801	3.28	6.92	4524	4475	3617	4282	4264	4611	4562	6431	6031	4982	5144	6387	5047	3.01	6905	6564	3381	3473	4431	5281	2131	4052	5356	4404	4529	6094	6154	5047	5.85
ATP2A2	13.11	12.52	13.04	13	12.57	12.87	12.76	12.45	12.76	13.25	13.04	11.38	12.44	12.82	13.13	13.03	12.78	12.02	12.01	12.9	12.72	11.77	10.68	12.96	12.4	12.67	12.25	12.64	11.95	12.28	12.19	12.78	12.79	12.74	12.62	12.69	12.15	11.07	12.61	12.91	10.2	12.62	12.4	12.76	12.01	12.77	12.91	12.76	12.25
CD36	6375	4391	6.61	6482	4533	5979	5381	5729	7311	8.28	7682	5166	5164	10.04	7942	6456	5998	4934	3922	7646	5429	5886	3617	5609	5586	4812	4768	5.36	7867	8061	7586	6284	5989	7365	7369	7799	4871	7918	4918	7335	4935	6585	5568	6304	5.58	4791	6278	5758	9156
CPE	12.68	13.13	13.6	12.06	13.19	13.71	13.4	14.08	13.2	12.99	13.64	13.54	13.19	12.85	12.75	12.71	13.62	14.37	13.54	12.68	13.88	12.83	12.89	13.79	14.3	11.92	13.45	13.6	13.85	12.86	13.5	13.17	13.44	14.06	10.87	12.75	12.03	12.96	13.41	13.11	13.48	13.05	13.1	13.26	13.44	12.52	13.76	13.83	13.9
IL7R	7.17	5995	8305	7399	4.64	6719	6821	7555	7837	5796	6765	1.61	5024	4972	4.31	6596	4904	6413	3014	7667	6318	5773	0	3931	2715	3364	5.03	6003	8067	3819	6.77	7508	5182	4639	3862	6412	2734	3166	5.28	5.99	2131	5677	4.77	6339	7959	5.04	8457	5251	6282
HMGA1	11.46	11.45	10.61	10.43	10.88	10.04	10.43	10.52	9766	10.08	8982	10.3	9.96	9884	9815	10.39	9758	11.31	9892	10.11	9791	10.34	11.16	9952	9941	11.27	8.94	9648	10.01	10.75	9947	9534	9799	9759	9854	9923	10.53	11.3	10.53	9852	10.6	9.79	9736	9795	9795	9803	9007	10.02	9497
PRKCA	9709	8939	10.43	9978	9551	10.4	10.66	8097	10.98	10.01	11.12	9047	9126	10.31	10.8	10.19	9357	9567	7894	11.37	9879	8597	8848	10.08	8635	10.01	8543	9517	10.18	8854	9535	11.63	9352	9159	10.14	10.93	8655	8268	8498	9322	7719	9084	9651	9491	8984	8912	9984	9761	10.37
ITGA2	11.59	10.44	11.24	10.56	8.26	10.41	10.14	9965	10.56	10.61	10.82	7994	8859	10.32	9664	9994	8731	7946	8285	10.91	9705	8448	7759	8846	8777	9651	8553	10.41	9582	8352	9489	10.3	8618	9659	11.7	10.41	8862	7846	8897	10.37	6495	8525	8645	9647	8645	8925	10.25	9.86	9519
GJA1	12.3	11.95	11.48	12.93	11.78	11.9	11.58	11.7	12.2	13.03	12.12	11.78	10.24	11.35	12.49	11.34	11.37	10.91	10.12	12.43	11.8	11.72	10.81	11.42	11.37	12.58	10.34	11.66	11.5	10.74	11.06	11.33	11.28	11.56	11.98	12.25	11.82	11.05	11.13	12.27	9756	10.38	10.91	11.99	10.71	10.36	10.98	11.61	11.42
CAPN2	11.83	11.09	12.43	11.88	11.16	11.44	11.85	11.41	11.83	11.75	11.88	11.05	12.18	11.26	12.05	11.67	11.81	11.24	12.43	12.15	11.47	11.41	10.68	11.36	11.45	11.14	12.68	11.31	11.53	11.16	11.28	11.59	11.05	11.33	12.6	11.7	12.09	11.03	11.74	11.58	10.96	11.24	11.08	10.85	11.38	12.09	11.63	11.63	11.8
CEBPB	10.92	10.29	10.53	11.05	11.66	9675	10.71	9696	10.09	10.69	10.12	10.51	9837	9007	10.5	10.6	10.13	11.35	10.14	9926	9437	11.22	10.72	10.91	10.04	10.16	9605	8.36	9466	9865	9843	9103	10.27	9707	9638	10.17	9932	10.47	10.96	10.73	9604	9245	9176	9625	9846	7792	9004	9632	9434
HLA-G	6383	8202	7172	7001	6578	5959	6.94	6272	5439	5046	5084	7828	6279	5412	6462	8056	6007	5.02	6422	6768	4577	5805	6924	6007	5883	6005	2768	7312	7172	4993	7426	3272	5239	6455	4789	5243	6277	5865	5866	4264	8362	5675	3746	7462	8645	6091	4139	6089	7446
PTPN2	9225	9286	8853	9.3	9088	8457	8632	9232	8925	8904	8574	8895	8729	8549	8861	8553	8705	9062	9168	8855	8811	9193	8752	8614	8866	9.04	8753	8737	9.25	9222	8949	8577	8523	8598	8687	8769	9204	8808	9307	9047	8919	8749	8593	9078	8925	8667	8.89	8679	8945
ENG	10.6	9607	11.76	10.14	9435	11.04	10.51	11.27	10.31	10.28	11.29	10.55	11.97	10.98	10.94	11.99	9709	11.24	10.13	11.48	10.13	12.1	11.43	11.03	10.47	10.94	10.1	9954	10.55	12.66	10.37	10.65	11.66	9545	11.57	11.86	10.67	12.27	10.19	10.81	11.37	11.46	10.93	11.39	11.44	10.88	10.38	9776	10.59
XBP1	12.87	13.48	12.79	14.09	14.49	13.82	12.85	15.62	12.84	14.6	13.53	13.49	13.3	13.48	12.73	13.85	14.35	12.86	14.44	12.99	13.49	13.96	13.55	13.54	14.37	12.51	14.91	13.4	13.93	12.55	14.19	13.07	14.77	14.57	13.57	13.06	12.96	12.73	14.59	14.13	14.26	14.79	14.65	13.43	14.17	13.31	14.07	14.18	13.65
LGALS3	12.41	12.74	12.24	12.6	12.28	11.65	12.36	11.45	12.38	12.66	11.43	11.64	10.63	11.53	12.17	12.17	11.54	11.35	12.26	12.11	11.72	12.14	11.73	12.35	11.83	12.12	10.53	11.3	13.26	11.12	11.82	10.93	11.7	12.19	11.8	12.2	12.54	11.85	11.8	11.53	11.15	12.08	11.05	11.31	11.9	11.4	11.06	12.17	12.64
FLT1	10.77	8695	10.42	9301	7057	10.03	9275	10.74	10.09	9604	10.78	7167	11.32	10.75	8686	11	9872	10.81	8717	10.3	7918	9659	8058	8966	8736	8637	10.54	8344	9099	9384	9329	10.18	10.83	8769	9149	10.75	9.22	8.2	8969	9931	8604	9997	9798	9873	10.3	9696	10	8.24	9.8
PTPN1	10.72	10.62	10.61	10.5	10.14	10.61	10.58	11.73	10.64	10.52	10.58	10.14	10.53	10.7	10.27	10.42	11.02	11.13	10.26	10.46	10.57	10.34	9561	10.13	10.37	10.16	10.65	10.31	10.69	9727	10.56	10.55	10.79	10.36	10.12	10.38	10.64	9382	10.5	10.5	9915	10.45	10.52	10.4	10.7	10.51	10.43	10.49	10.7
ALOX12	3747	3145	2402	3549	2402	3039	2669	2577	2362	3493	1867	3121	3241	2417	3094	2566	2597	0.5342	2093	2905	2281	2948	3089	1976	2822	2549	2875	2.37	2433	0.629	2739	2221	1557	2698	2425	2188	2925	2776	2468	1187	1428	1972	2595	2378	2648	2.94	2506	1906	0.992
IGFBP2	11.82	12.2	12	11.18	12.87	13.08	12.91	12.71	11.63	11.51	11.39	13.61	13.32	11.72	12.22	12.52	12.73	11.24	12.46	12.04	12.12	12.85	14.37	13.15	12.21	12.63	11.53	12.2	12.26	13.31	12.13	11.59	12.68	13.28	11.35	11.25	13.22	15.8	12.88	12.61	13.94	13.04	11.93	12.37	12.95	12.63	12.1	11.78	12.08
BMP7	10.28	9248	9277	8519	9733	8007	8.86	7064	8751	9014	9433	8521	6809	7951	9649	8207	7076	7903	9746	8.95	8806	8338	8253	9505	8808	9696	8979	9109	8598	11.55	7999	8972	7194	8669	11.15	8812	7897	7998	7.07	8921	6046	7478	6972	9527	6937	9152	8548	8387	8177
ITGB5	11.38	11.4	11.42	11.26	11.63	11.97	11.55	12	11.22	11.54	11.49	11.9	11.36	11.61	11.73	11.33	11.68	10.67	11.79	11.45	12.12	11.81	12.09	11.82	12.07	11.94	12.07	12.08	11.05	11.84	11.87	11.39	11.7	12	12.06	11.29	11.64	11.87	11.72	11.58	11.5	11.9	11.92	11.54	11.97	11.66	11.72	11.7	11.43
RPL7	10.8	10.3	9997	10.83	10.42	10.63	10.37	10.72	10.47	10.52	10.2	10.94	10.9	10.47	10.76	10.94	10.62	10.33	10.85	10.38	10.59	11.27	11.49	10.19	10.5	10.84	10.86	10.27	10.76	11.28	10.69	11.04	11.09	11.08	10.33	11.01	10.69	11.25	10.97	10.78	11.48	10.41	10.55	10.65	10.81	11.32	10.56	10.48	10.49
VCL	12.64	10.56	12.81	12.19	12.14	13.05	12.93	11.95	12.51	12.51	13.99	10.37	11.51	12.54	13.42	13.09	11.21	12.07	11.18	13.06	12.45	11.1	10.59	13.24	11.54	13.09	10.7	11.77	11.16	11.14	11.68	12.68	11.99	12.3	12.92	13.22	11.22	10.61	11.74	11.75	9302	11.7	11.89	11.99	10.96	12.34	12.17	12.07	12.05
PTPRA	11.08	11.2	11.09	11.05	11.27	11.01	11.37	10.72	11.25	11.04	11.15	11.23	11.22	11.05	11.29	10.83	11.18	10.22	10.31	11.07	11.62	10.95	10.76	11.07	11.09	11.24	11.02	11.83	11.1	10.9	11.23	11.18	11.18	11.18	10.96	11.07	11.01	10.84	10.82	10.87	10.7	11.18	11.23	11.18	11.02	11.02	11.08	11.19	11.21
IL1RN	8847	8136	9555	8445	6781	7163	7217	7207	6183	10.48	6481	7688	7535	6378	7294	7203	8742	6421	6271	7432	6075	6308	6319	5978	6246	7083	5666	7653	8059	4209	5917	5934	6749	6718	8698	7653	7289	5894	6529	6163	4743	4986	4302	5925	5447	3731	6355	5431	6147
ITGB6	11.51	10.14	10.86	10.71	9405	9338	9.58	9886	9682	10.38	9054	8505	9455	8722	9.53	9033	8674	7511	8267	10.46	8682	9.1	8675	8078	9169	9473	7206	8621	9884	7705	8727	9	8081	8919	9927	9589	9.83	8653	9031	9979	7.61	7311	7865	8602	8381	6033	8188	9097	9672
LAG3	5802	6631	6373	6615	7366	5998	6576	6539	5319	6409	5379	6962	4.87	5442	7.29	6596	5.59	7879	6597	6354	5721	6874	7784	8374	5646	7374	5252	5699	5505	6493	5987	4668	5959	5034	7468	7003	6948	7432	5582	6392	7607	5455	5062	6517	7027	4073	4964	4464	5353
CDH2	6842	4699	9248	5.15	5906	8374	8245	3501	8748	6114	7.44	5081	7658	8348	7418	7579	2434	6962	4203	9215	5096	5787	6723	6943	4408	8665	4417	4.77	7934	7529	7802	6261	5784	5753	6429	8528	4441	4544	7.31	6741	3774	4212	5318	6359	4156	4226	6172	3469	8.41
TSPAN8	10.44	11.1	10.65	11.04	13.23	11.01	11.81	12.27	11.57	11.22	10.71	12.75	11.14	10.1	12.05	11.06	10.19	10.3	11.02	10.61	12.55	11.87	12.32	12.48	11.92	12.34	10.63	13.03	12.06	10.76	11.25	10.35	10.93	11.84	4812	9.68	10.43	9925	10.95	11.38	10.35	12.16	11.2	10.86	11.1	11.79	11.34	11.81	11.39
MYL12A	11.92	12.03	11.56	12.05	11.89	11.68	11.88	12.06	11.85	11.83	11.84	11.96	12.26	11.55	12.11	12.04	11.73	12.49	12.17	11.8	11.98	12.5	11.77	11.99	12.27	12.03	11.64	11.83	12.38	12.4	11.99	11.21	12.09	12.24	12.06	12.08	12.12	12.64	12.1	11.57	11.77	11.93	12.25	11.9	12.12	11.37	11.94	11.43	12.08
CD58	7756	6731	7.22	7457	7042	6267	6084	7287	7217	7.37	6617	6938	7156	6441	7139	7036	6935	6797	6992	7.2	7026	7417	6869	7131	6875	6905	6494	7097	8017	7087	6895	6785	6812	6817	6873	7.17	7162	7278	7505	6867	6323	7248	6993	6621	7133	6905	7273	7088	7484
VCAM1	9187	6646	9867	8284	5723	8.2	8555	8362	7876	7734	8511	5322	8779	8173	7722	8914	7494	9023	7.07	10.02	6759	8487	6386	7362	7443	7989	7654	6789	9828	10.13	7656	8095	8472	6729	7421	10.01	7642	7692	7692	9054	6425	6621	7.14	7.95	8854	6.95	7788	7019	8486
FUT1	7111	7509	7215	7574	7477	8.19	7616	6246	7434	7922	7325	7381	6795	8032	6219	7524	7861	6101	6497	7571	7117	7154	8269	6903	7762	6621	6018	6863	7816	8255	8109	7615	8307	7891	7224	7.52	8218	8757	6945	7.24	8168	7152	8.23	7.99	7.33	9099	7.51	7694	7798
TFE3	10.58	10.39	10.63	10.41	10.3	10.31	10.35	10.54	10.13	10.43	10.42	10.08	10.52	9995	10.88	10.76	10.02	10.48	10.05	10.65	10.5	10.37	9701	10.78	10.38	10.87	10.4	10.02	9956	10.09	10.2	10.09	10.23	9908	12.21	10.63	10.28	10.08	10.44	10.46	9427	10.25	10.33	10.26	10.05	9995	9693	10.21	10.08
SLC9A1	11.23	11.15	11.14	10.34	11.33	10.48	10.74	9925	10.42	10.49	10.52	10.21	10.44	10.82	10.61	10.79	9923	10.52	10.25	10.71	10.67	10.25	10.74	11.08	10.33	11.2	9771	10.96	9677	9925	10.46	10.18	10.22	10.2	12.27	10.47	10.11	10.18	9824	10.5	10.37	10.24	9801	10.58	10.12	10.04	10.06	10.59	10.3
CEL	8636	8004	7365	7995	9174	6487	6757	5355	7.11	9954	6.18	8849	6766	11.41	8473	5.75	6107	6004	5185	5596	6549	6721	6715	7.81	5616	8761	4.99	6381	4776	13.2	6346	5983	4282	6973	8506	7059	6454	6247	6881	6435	2498	4488	3516	5027	4562	2326	4558	5006	5072
HLA-DPA1	11.66	11.8	11.88	12.26	11.23	11.92	11.6	12.25	12.38	11.44	11.95	11.54	10.68	11.08	11.06	11.61	10.79	11.25	10.73	12.32	11.21	12.74	11	11.62	11.02	11.34	10.42	10.78	12.53	12.4	11.12	11.22	11.98	11.04	11.87	12.4	11.68	12.61	10.92	10.75	10.91	11.16	11.21	12.15	12.43	10.96	11.42	11.56	12.02
ANXA7	11.57	11.49	11.48	11.51	11.58	11.31	11.57	11.63	11.72	11.39	11.61	11.4	11.83	11.39	11.57	11.65	11.36	11.11	11.62	11.63	11.68	11.18	10.95	11.71	11.74	11.72	11.69	11.73	12.2	11.58	11.58	11.19	11.55	11.58	11.6	11.87	11.29	11.03	11.44	11.35	10.7	11.51	11.35	11.63	11.58	11.45	11.6	11.47	11.98
CD33	4258	4936	5.04	5322	3717	4291	4647	4631	5555	5.24	4976	3.79	4958	4524	3445	5303	3891	4021	3108	5.9	3897	5327	4225	4282	3659	4704	3393	3611	5986	4582	4393	4768	4818	3.38	3905	6148	5201	5.53	3549	4505	4.6	3965	4328	5092	6095	4398	3911	4.76	5181
AZU1	0	0	0	0	0	0	0	0.5347	0.3728	0.5922	0	1019	0.4508	0.3896	0.5568	0	0	0.9231	1063	0.4054	0.8255	0	1384	0	0	1146	0	0	0	0	0	0.3843	0	0	0	0.8401	2513	0	0.4973	0.5115	0	1299	0.4436	0.4654	0	0.3059	0	1247	0
CD22	5737	4235	4.79	5957	5067	6792	5727	3808	5471	4528	5364	4.08	5977	4071	6462	6191	5452	6262	3636	5803	5322	6181	5186	6606	3659	7423	5.2	4.7	7135	5921	3994	5594	5842	3144	6103	6351	4.31	7.17	3443	5148	4743	6563	3.47	4643	7381	3.51	4584	4306	4.33
ITGAL	7877	8532	8821	8665	7211	7587	7251	8283	8128	7804	7365	5907	6.58	7584	6144	7931	6676	7972	6397	8551	7195	8498	6527	6952	5631	7035	6207	7052	8277	7.45	7165	7698	7.31	6516	5253	8538	8109	8592	6141	7.76	7.41	7338	6644	8437	9364	6.7	7253	7333	7566
ITGAX	6404	6583	7715	7838	5.42	6534	6106	9106	7.49	6987	6422	6914	7385	6937	5602	7513	7029	8314	6198	7912	6171	8608	6.67	5705	6083	6132	7419	5906	7428	8041	6697	6965	7498	3955	4789	7.38	7975	8168	6586	7.3	7527	7872	7053	7589	8752	6431	6758	6414	7054
CAST	12.83	12.58	12.6	12.81	12.53	12.52	12.62	12.42	12.6	12.76	12.64	11.75	12.04	12.15	12.56	12.58	12	11.61	12.01	12.6	12.65	11.98	11.24	12.65	12.36	12.49	11.32	12.95	12.54	11.47	11.94	12.4	12.25	12.34	12.04	12.68	12.01	11.39	12.29	12.22	10.78	11.79	11.78	12.43	11.97	12.6	12.54	12.33	12.66
EFNA1	12.18	11.76	10.8	11.68	12.64	10.82	10.94	12.2	10.92	12.53	10.32	11.55	11.18	10.58	10.46	11.63	12.81	12.68	12.02	10.81	11.62	11.79	12.26	11.39	11.43	11.96	11.93	10.57	11.77	11.34	11.41	10.87	11.05	11	10.19	10.54	12.21	11.79	12.47	11.3	12.12	11.1	11.23	11.33	11.26	11.36	10.55	11.12	11.35
COL5A1	9186	8165	11.86	9656	10.12	10.54	10.09	10.36	10.26	10.08	10.93	9752	12.18	10.72	11.43	11.57	9674	9941	9.26	11.18	9743	10.91	10.36	10.77	9772	10.64	9238	9733	9507	11.18	9753	10.58	11.01	8843	9738	11.09	10.3	10.21	9593	10.77	8481	10.54	10.42	10.58	10.18	10.44	10.11	9339	9759
MAG	2356	1651	1.28	3267	2894	3.98	3622	0	0.9143	0	1468	2028	2855	0.6959	5761	3105	2051	0	1063	1.2	0.8255	2452	4798	4117	0.5906	5868	2208	2072	0.4854	3703	1318	0	2628	1905	4274	1913	0.9574	0	0	1187	0.5086	4174	0.4436	1335	0	0.5582	0	0	0.7306
RASA1	9936	9292	9691	9833	9336	9347	9618	9432	9884	9.82	9761	8469	9615	9.88	9571	8933	9.42	8441	8812	9924	9372	8788	8165	8.78	9172	9042	9856	10.23	9484	9965	9.45	10.09	9335	9105	10.01	9503	8137	7544	8739	9682	7.59	9362	9144	9364	9287	9926	9921	9492	9.64
FUT3	8051	7753	6567	7061	6795	6126	6817	5018	6274	7558	4955	7076	5193	6.06	6931	5854	4842	4207	4846	6716	4.96	5461	6616	5479	5264	7295	4477	5267	5162	2.81	5702	4992	4929	6498	9.7	5283	6615	5657	5119	6101	5504	4174	4.22	5916	3591	1939	4271	5027	5757
PTN	9.15	10.07	10.26	9624	8.41	9936	11.08	9972	11.62	10.06	11.15	9.95	9959	10.41	10.33	11.01	9724	12.63	9729	11.2	10.52	9712	10.98	11.19	10.71	9707	7802	9534	11.76	10.18	9598	9306	10.08	11.36	9329	11.37	10.06	8745	9172	9692	9739	9611	9.76	10.52	9974	8.91	9937	9397	10.85
CSRP1	13.87	12.86	14.53	14.36	15.31	14.8	14.88	13.45	14.02	15.08	15.43	14.86	11.98	13.76	16.61	15.09	13.33	14.55	13.68	14.5	15.18	14.62	14.75	16.49	14.53	15.85	13.05	13.86	14.36	13.67	13.62	13.88	14.52	14.88	15.26	15.58	14.52	14.39	13.81	13.99	14.29	13.9	14	14.53	13.2	13.46	13.59	14.17	14.44
FLNA	15.33	12.29	16.54	15.54	15.89	16.55	16.25	14.34	15.64	15.87	17.05	15.26	13.87	15.76	17.8	16.38	14.17	14.54	14.13	16.47	16.16	15	15.53	16.99	14.91	16.62	13.85	14.88	14.44	14.02	14.64	15.68	15.48	15.01	16.36	17.02	15.05	14.68	14.76	15.65	14.52	15.1	15.16	15.5	13.93	15.3	15.13	15.51	15.2
NF1	11.28	10.79	11.22	11.21	10.39	10.94	11.13	10.64	11.32	11.07	11.36	9.52	11	11.46	10.57	10.68	10.34	10.01	9718	11.51	10.68	9509	9521	10.58	10.45	10.63	10.46	11.56	10.5	9837	10.64	11.41	10.62	10.5	11.27	10.94	10.23	9.38	10.23	10.88	8718	10.53	10.59	10.8	10.17	11.13	11.26	10.95	10.78
ABCB4	4194	3863	4359	3367	3259	3531	3887	3611	4475	4828	3.48	3942	3791	4.27	4377	3553	2866	3939	3636	5036	2991	4196	3795	3807	2335	3246	2579	3493	3744	6297	3.48	4153	4208	2409	3217	4759	2925	4.7	3647	4205	3364	4009	3373	4.24	4239	3057	4137	2594	3259
S1PR1	9097	6.75	9525	7314	7042	8.55	8723	9113	9319	7773	9783	6738	9165	8.45	8958	10.21	8301	9606	7642	9374	7615	8965	7306	8507	7274	7643	7996	6612	9012	8366	8288	8998	8656	8103	7893	9873	7012	7302	8051	8578	6949	8484	8307	8626	9086	7822	8947	7521	9253
KITLG	9552	9188	9666	10.07	9094	9559	9741	9016	10	9859	10.23	7659	8944	9833	10.12	9.26	8444	8213	8262	10.5	8913	8749	7354	9462	8554	9752	7482	9819	9644	7903	7717	9.48	8576	9726	10.67	10.81	8675	7186	9052	9622	6593	9266	8848	9696	8853	8564	9559	9675	9776
NT5E	9284	9.51	9445	8.12	8642	8683	9473	7258	9197	8282	9148	8122	8514	8198	9729	9444	6685	7634	7375	10.59	8378	7393	8333	9.46	8229	9188	6472	8125	8988	8347	7959	8321	8072	9.15	9031	9481	7649	7283	7452	8518	6195	7652	7626	8084	7.89	7918	8639	7448	9159
EPHA1	9.24	8738	8649	8297	8.58	7902	8.54	8071	8.21	8656	7781	8.92	8363	8326	7763	7181	8185	5775	8322	7993	8657	8612	8236	7772	8088	8467	7657	7826	7.71	8117	8291	7466	7709	8443	7814	7796	8558	8419	8078	8.53	7668	7931	7979	8481	8354	8649	7903	8218	8052
MDK	11.11	12.03	10.95	11.2	11.17	10.94	11.78	12.28	11.2	11.07	10.79	12.79	11.12	10.9	11.03	11.53	12.41	11.05	12.01	10.95	10.99	11.91	12.81	12.04	12.28	11.57	11.72	10.88	11.74	12.07	10.41	11.04	12.58	11.49	9.82	11.65	12.13	12.41	10.34	11.69	11.9	11.21	11.9	12.44	11.76	9655	10.24	10.93	11.61
ZP3	5833	7692	6923	7272	7.35	6861	7199	7336	6378	7062	4779	9238	7063	8436	5.98	7332	7925	8424	8557	6195	7442	7955	9238	6497	7903	8262	7955	5477	6.28	8814	8085	7456	8613	7159	4763	6605	9211	10.74	8929	7526	10.64	8315	7.3	7.56	8074	8012	7978	7178	5455
IBSP	1161	0	0.5619	0	0.4407	0	0	0	0.3728	0	2655	0	0.4508	0	0.5568	0	0	1696	0	0.4054	0.471	0	0	0.8786	0	0	0	0	1138	0	0.3771	0.9377	0	0	0	0.4804	0.9574	0	0	0.5115	0	0	0.4436	0.4654	0.6098	0.3059	0.8885	0	0.411
CD72	3.6	4658	4839	5594	4577	4352	4764	6026	4859	4664	3787	5284	4.87	3676	4048	4932	4443	7205	4.16	4932	4424	6.17	5744	4638	4.06	4726	4386	4427	5823	6595	3082	4402	4.75	3.76	3773	4603	5798	6206	4057	5022	6028	4322	3.47	5274	6.16	4031	3643	3926	4569
ERBB3	11.6	12.16	12.04	12.24	12.03	12.32	12.26	12.16	12.39	12.34	11.76	11.53	11	13.26	11.1	11.89	12.75	12.02	12.22	12.04	12.26	11.4	12.28	11.86	12.32	11.58	9.96	12.51	11.81	12	12.89	12.82	12.65	12.24	11.09	11.06	12.59	12.22	12.66	11.77	12.74	12.8	12.78	12.46	12.16	13.59	12.67	12.72	12.06
CD9	13.61	13.83	13.59	13.74	13.99	13.62	13.79	13.25	14.06	13.95	13.53	14.01	12.92	13.6	13.39	13.23	13.52	12.77	13.6	13.4	13.82	13.65	13.24	13.52	14.03	13.49	12.61	13.79	14.68	13.78	14.07	13.4	13.78	14.47	14.08	13.42	12.84	13.45	13.39	13.13	13.1	13.53	14.31	13.52	13.46	13.47	13.77	13.99	14.21
TGM2	10.81	12	12.92	13.73	12.25	12.3	12.59	14.13	12.75	12.23	13.06	11.45	11.48	12.42	12.62	13.29	11.08	12.27	12.36	13.81	12.58	13.7	11.4	12.52	12.82	11.91	12.31	12.2	11.92	13.16	12.23	12.53	12.96	11.4	12.65	13.8	12.02	12.2	12.7	13.19	11.45	13.1	12.25	13.48	13.32	12.89	12.72	13.32	12.73
BMP5	7671	2191	7785	0	0.4407	7062	6332	0	6135	3543	9347	0	7822	7377	3621	8753	0	7511	2421	5587	1889	2297	0.6196	4982	0	5955	0.9298	0.7146	5.76	5894	4309	6513	0.4047	3801	0	9.66	0	2393	0.4973	4137	0	0	0.7824	0.4654	3875	6477	3184	3058	6559
BMP6	5848	3649	8145	6313	4551	6343	6468	6148	6803	5919	7256	4897	8167	8118	6.08	7781	7005	7688	6461	7.42	5234	6532	6284	6317	5424	6679	7005	5895	7044	10.35	5957	7439	7043	6024	5062	7.11	7748	6676	6.62	6409	6145	6096	7548	7427	7247	6256	6372	6873	6.83
PCMT1	10.31	10.61	10.05	10.34	10.68	10.33	10.62	10.27	10.49	10.16	10.41	10.85	10.18	10.34	10.89	10.37	10.51	10.18	10.49	10.21	10.62	10.63	10.51	10.55	10.53	10.76	9926	10.68	10.94	9556	10.56	9993	10.66	10.91	10.31	10.81	10.43	10.72	10.47	10.18	10.57	10.32	10.81	10.38	10.31	9496	10.46	10.37	10.58
FUT4	7132	6991	7511	7439	6564	7301	7851	7157	7523	7.1	8124	7271	6624	7376	7309	7523	6819	7.1	6758	7.72	7665	7364	6856	7.58	7093	6471	7567	7.02	7479	7028	7191	7774	7429	7251	8567	7695	6747	6665	7078	7174	6793	7513	7169	7.33	7297	7787	7928	7337	7173
TNXB	9722	7964	11.66	8996	7804	10.26	9682	8523	9684	9489	9476	8699	9967	9766	12.03	9923	8.41	10.35	8606	10.69	8738	9917	10.11	9858	8231	9094	8498	8252	8203	9068	8945	9787	9.87	8152	9.77	9902	9408	9911	8729	10.27	9487	9282	9759	9596	9374	9304	9927	9049	8953
CDH3	10.31	10.69	9973	11.51	10.4	10.41	10.85	11.93	10.93	10.69	10.54	10.12	8002	10.07	9742	10.95	10.56	9477	11.93	10.77	10.05	10.8	9665	10.49	10.64	10.82	9415	9837	10.01	10.45	9641	10.49	10.12	10.37	9402	10.98	10.66	10.44	10.3	10.74	9564	9678	9717	11.23	10.17	10.05	9806	11.14	10
PAICS	10.81	10.62	10.21	10.66	10.91	10.64	10.69	11.5	10.58	10.88	10.78	10.06	11.32	11.1	10.6	11.55	11.31	11.57	11.88	10.52	10.83	10.88	10.58	11.39	11.39	10.9	11.55	11.16	10.44	11.72	11.23	11.46	11.51	11.14	10.94	10.42	11.39	10.69	12.04	11.41	10.76	11.52	11.06	11.65	11.23	11.4	11.71	10.76	10.52
IL10	2925	3257	4547	3921	2193	3032	1043	3557	3609	4249	3961	1.61	1303	3023	2103	3029	2866	3.18	2093	4261	0.8255	2.72	2.25	1175	1596	0.8548	2343	1.19	4088	2097	3.18	3003	3284	0	1208	4556	2513	2393	2923	1829	1638	1299	1816	2265	2381	0.7728	2884	2356	2986
ACHE	5427	7181	7044	8453	7312	6719	7642	8104	6553	8416	6642	7541	10.28	6144	8755	7481	7948	7701	9477	7469	6.1	7.62	7918	6918	8031	7234	7165	5479	7331	7161	6098	6655	7399	7039	6884	7356	8167	7732	8547	7824	7982	6478	6.28	6697	7155	7167	5473	7665	6427
NME2	12.15	12.42	11.5	12.23	12.03	12.19	12.05	12.76	11.54	12.23	11.74	12.91	12.93	11.86	12.39	13.07	12.17	13.47	13.25	11.81	12.45	13.44	13.89	12.67	13.07	12.5	12.15	11.5	12.31	12.91	12.55	12.3	13.08	12.68	12.11	12.43	13.42	14.22	13.15	12.36	14.21	13.03	12.14	12.97	12.77	12.71	12.27	12.27	11.98
FGFR3	11.54	10.65	10.83	9684	10.25	9517	9.06	9778	9795	11.19	8194	10.25	8286	9992	9.25	8425	9935	9224	9476	9591	9608	9057	10.02	8737	9408	9894	10.46	9297	9123	4291	10.55	9445	9817	9419	10.36	8539	9897	8598	9615	9.57	9.72	9522	9539	8589	9411	9146	8998	8708	9458
CBL	9395	8452	9554	9203	8.58	9259	8.84	9053	9443	9097	9448	7156	8951	9554	9105	9076	8866	8541	7923	9733	8464	7797	7266	8935	8513	9243	8.66	9094	8568	8702	8945	9.73	8695	8227	8.52	9401	8.41	7369	8538	8875	6593	8773	8763	8901	8872	9194	9257	9121	8924
FBLN1	12.15	12.41	13.76	12.52	11.61	12.99	13.19	12.82	13	12.79	13.8	13.13	12.53	13.03	13.83	14.81	11.62	14.01	11.79	13.96	11.93	12.97	12.86	13.94	11.69	12.62	11	11.25	12.08	13.38	11.7	12.21	12.71	12.05	12.87	14.4	11.98	13	11.94	13.27	12.07	12.59	11.6	13.1	12.97	12.02	13.02	11.67	12.36
ITGA6	12.98	12.37	12.56	12.41	11.67	12.03	12.02	11.74	12.19	12.5	11.98	11.42	11.97	11.67	11.84	11.64	11.69	9718	11.51	12.07	11.86	11.19	10.83	11.28	11.42	11.91	12.07	12.46	11.71	9918	11.64	12.13	11.35	11.67	12.37	11.86	11.28	10.28	11.76	11.71	10.3	11.66	11.62	12.06	11.29	12.44	12.36	11.71	11.83
PPIB	12.69	13.48	12.38	12.81	13.58	13.43	13	13.71	12.73	12.92	12.97	14.4	14.29	12.97	12.94	14.04	13.99	14.52	14.45	12.67	13.27	14.29	14.77	13.85	14.27	13.11	14.06	12.47	13.26	13.99	13.78	12.68	14.01	13.93	13.88	13	13.8	14.75	14.18	13.22	15.35	14.31	13.64	14.15	13.95	13.8	13.83	13.16	13.17
RPS3	14.64	14.85	13.86	14.64	14.86	14.49	14.68	14.83	14.16	14.6	13.93	15.47	14.87	14.07	14.61	14.86	14.51	15.28	15.31	14.18	14.79	15.6	16.04	14.81	15.05	14.96	14.9	14.17	14.67	15.19	14.37	14.67	14.5	15.12	13.87	14.81	14.84	15.93	14.99	14.74	15.94	14.31	14.47	15.09	14.87	14.9	14.13	14.34	14.27
CBLN1	0.4978	1946	0.5619	0.7574	1652	2601	1469	4023	1124	2773	0.5276	2732	1679	1163	2833	3497	2985	2673	0.627	2841	1551	2122	3261	0.8786	1008	2082	1706	2615	0.4854	4165	1883	3.94	1844	1566	0.523	0.8401	4.24	2239	2999	0.8884	3364	2775	2411	2901	1634	1939	3184	2.89	1405
JAK1	11.87	11.45	11.88	11.87	11.19	11.79	11.87	11.3	11.66	11.58	12.08	10.36	11.34	11.8	11.65	11.79	10.43	10.97	10.77	12.14	11.26	11.04	10.43	11.2	11.09	11.69	10.88	11.74	11.2	10.35	11.31	12.01	11.33	11.31	11.98	12.06	10.76	10.73	11.1	11.44	10	11.1	11.15	11.66	11.2	11.04	11.56	11.57	11.44
PTPRB	9793	7798	9.87	8949	7344	9424	9197	8722	9656	9282	10.42	6857	10.14	9901	9119	9467	8344	8424	7573	10.25	8356	8821	7597	8356	7762	8.2	8836	8266	9378	8673	8795	9605	9821	7965	8917	10.23	8628	7692	8303	9282	7524	9228	9309	9767	9484	9297	9771	8451	9748
PTPRD	7296	7323	8.11	6823	8622	7536	7.7	8157	8236	7479	8513	7615	7444	7.19	7345	7.07	5681	5953	7809	7.9	7957	7517	7118	7848	6594	7159	5488	9391	7544	5031	7.57	9245	7368	7896	6.72	7921	6.2	4332	4636	7319	6495	7225	6473	7743	7702	7535	7887	6359	7899
PTPRZ1	9941	8.89	10.28	8482	6.34	7746	7317	6.6	7929	8.53	7465	5059	7791	7344	6.58	7284	5895	2771	4873	9114	6733	5179	5841	6798	4.97	7215	5108	7514	7.5	0	7628	8326	5.43	7.7	4961	7917	7181	8985	5981	8519	2699	5677	6008	6119	6201	4113	6671	7098	7416
TNFSF4	5609	6212	5997	5712	6128	5858	6803	5339	6813	5749	5983	6622	5854	6456	5.87	5458	6622	5369	6132	5662	6246	6499	5814	6184	6104	5765	6537	6414	7702	6412	5987	6979	5784	6153	4.67	6204	5342	5672	5453	5579	5921	5704	5454	6071	6724	5862	6.59	5604	7222
OMG	2572	1279	0.5619	1911	1478	1427	1642	1884	0.9143	1011	0.5276	0	1679	1163	3315	1695	1.53	2454	0	1391	0.8255	0.6406	0	1175	1008	0.4897	0.5385	1834	1765	1066	0.3771	1151	0.9793	0	0	0	0.9574	0.6151	1956	1829	0.8839	0.9813	0.4436	1099	1037	0.9596	1187	0	0.411
CFL1	13.38	13.76	13.16	13.25	13.85	13.5	13.48	13.82	13.06	13.49	13.46	14.09	14.12	13.39	13.57	14.04	13.87	14.38	14.07	13.04	13.73	14.31	13.98	14.14	14.21	13.85	13.68	13.21	13.36	13.97	13.56	13.04	14.02	13.99	13.53	13.51	13.95	14.58	13.81	13.43	14.04	13.99	14.01	13.73	13.77	12.81	13.2	13.39	13.27
GATA3	10.44	10.85	9926	10.11	10.18	9174	10.52	8316	10.01	9.7	8787	9466	8313	9039	9891	8018	6584	6.92	8471	10.42	9379	9223	9969	8998	9382	11.04	6874	9377	8779	7413	9182	9085	7727	9543	12.18	9308	10.31	9617	7776	9755	8297	7253	8055	9342	8459	6214	7289	9601	9.19
PRPH2	3.74	6306	6101	5108	5156	4382	3852	2772	5906	4.36	5497	5956	3586	3841	6172	5236	2592	4801	2913	5527	4316	3314	4682	5452	3263	4434	3.12	5141	4217	3641	3727	3057	3284	3.38	4338	5677	3727	4609	2843	4137	3106	3772	3322	5027	2.87	3.54	3951	5143	3488
IL32	7849	9375	8608	10.51	8.88	8.51	8901	9719	9093	8226	9734	9.66	9004	8282	8702	9349	8284	10.95	10.87	9583	8.74	10.21	9.82	10.54	9437	8.9	8978	7964	9902	9732	8299	8477	9128	9.59	7831	10.02	10.11	11.28	8415	9356	10.66	8811	8428	9965	10.48	8138	8.18	9599	8515
LAMA2	8583	7364	10.54	7474	6719	9204	9575	8.34	9107	7776	9839	6681	10.84	9.34	9831	9.58	6835	8385	7193	10	7803	8328	7812	8089	6293	8884	7124	8843	8052	9008	8234	9198	9163	7213	9044	9958	6809	7608	7244	7762	6515	8081	8424	8811	8393	9.17	9323	6924	8719
IL4R	10.94	10.24	10.99	10.68	9909	10.07	9986	11.17	10.35	10.63	10.33	10.21	9977	9507	10.96	10.36	10.39	10.47	9758	10.42	10.43	10.51	10.11	9994	10.18	10.29	9965	9731	10.08	9297	9713	9993	10.01	9.54	9.84	10.73	10.61	9788	10.22	10.37	10.07	9.89	9786	10.39	10.1	10.58	9456	10.33	10.33
TNC	11.67	9387	11.45	11.89	10.53	11.28	11.32	12.21	11.39	11.57	12.33	9747	9971	11.49	12.04	12.89	11.08	10.19	10.53	11.94	11.87	11.23	9428	12.98	12.33	10.61	9605	10.73	9882	13.3	9866	11.89	11.67	10.74	10.04	12.03	11.2	10.76	10.73	11.45	8672	11.71	11.13	12.32	11.24	10.58	11.6	11.64	10.56
MYL9	13.99	10.94	14.82	14.61	15.31	15.31	14.97	13.33	14.34	14.93	15.72	15.63	12.47	13.95	16.81	15.36	13.09	15.19	14.04	14.7	15.42	15.17	16.05	16.8	14.4	16.12	12.79	13.62	14.44	13.81	13.69	13.84	14.77	14.94	15.39	16.25	14.84	15.4	13.88	14.61	15.46	14.09	14.17	14.36	13.15	13.66	13.52	14.25	14.5
CXCR1	4879	1.05	1538	3747	0.4407	4322	1272	0.5347	3644	3903	3.74	0.5975	2.78	3841	1936	1.48	1175	1229	0.627	6348	0.471	3467	0	0	0	2445	0.9298	0.7146	4154	4407	3272	4936	1557	0.4772	1458	5732	0.9574	1871	0.4973	1992	0	0	1485	1538	1.86	2456	3951	3968	4609
CXCR2	6961	7.41	6.56	7827	6106	6251	5305	4578	6257	7899	5801	5778	3293	5607	6909	3979	4709	0	3196	7429	6007	4769	5758	4924	4771	7902	3043	6336	4991	0	5751	6044	4157	6185	8126	6.68	6772	4254	3906	5216	2498	3136	4302	5987	3875	2883	5402	6035	5766
APC	9719	9262	9878	9743	8926	9765	9603	8978	10.1	9878	10.03	8.23	8942	9832	9555	8922	9282	8607	8914	10.1	9.35	8434	8078	8966	9365	9185	9.25	10.34	9517	8827	9926	10.49	9654	9431	9.41	9741	8.28	6725	8896	9436	7.54	9437	10.62	9455	8965	10.37	10.14	9.5	9757
CD24	11.2	12.15	12.12	11.28	11.81	12.04	12.58	11.62	11.66	12.12	11.88	12.33	13.09	12.15	11.59	13.14	12.9	10.12	13.58	11.97	12.13	12.5	12.68	12.42	12.79	12.37	13.46	13.58	12.31	12.69	11.82	12.69	12.78	12.84	14.97	11.69	12.22	10.71	11.85	12.83	11.95	13.03	12.27	13.37	10.1	11.81	13.41	11.94	12.76
COL8A2	7471	7293	9538	8596	8602	9478	9633	8075	8727	7804	8691	8269	7392	8642	9.76	9343	6843	8385	7791	9743	8506	8824	8542	9659	8458	9898	6986	8038	7.99	10.28	8315	8486	8595	7808	8.08	9321	8897	8813	7582	9276	7351	7836	8289	8595	8.03	8125	7788	8497	8.49
FPR2	3.55	1279	2846	4.27	1478	2497	0.4368	4209	3501	2826	3641	1834	1835	3489	2389	2047	1175	0.9231	1397	5132	1.11	2946	0	1175	1008	0.8548	0.5385	1.38	4712	2425	2802	3851	1844	0	0.523	5128	0.9574	1045	1956	1187	1428	0.5725	0.7824	2016	1634	1847	3991	2699	3.57
PTAFR	6485	6081	6567	6193	3968	6045	4626	5789	6.53	6497	5742	2616	4796	5998	5086	4932	4312	3896	3196	6958	4977	4151	3178	3807	4145	5455	3568	5382	6396	4615	5924	5926	4914	4094	5.04	6735	3919	4442	3825	5113	2264	4986	4844	5669	5672	5346	5655	5806	6141
MPZ	6294	4462	8414	6072	7477	3901	6106	4278	6869	6718	6437	6545	4379	5492	10.09	6649	5513	6166	3572	6331	6246	5532	5207	7819	3823	6259	3512	4.77	6.34	3703	5837	4964	5613	6105	7754	8915	5086	3941	4706	6.23	4128	5996	6299	6004	5.3	3989	4707	5216	5977
AZGP1	14.44	15.98	14.26	14.46	15.99	15.27	15.1	14.19	14.47	14.23	14.35	16.87	12.35	15.37	14.47	14.06	15.28	12.12	13.83	14.27	15.65	15.08	16.64	15.49	15.69	15.09	11.4	15.34	15.31	16.02	16.14	13.86	15.35	15.77	10.68	13.98	14.97	17.81	15.89	13.85	16.28	15.93	16.14	14.57	14.87	14.89	14.74	15.61	14.83
LAMA1	6302	3202	4633	3.16	3259	4322	3446	3611	3743	4.02	4914	3678	2528	7052	3565	4307	5.75	4021	1896	4023	3608	3.23	3089	3573	3475	3669	3393	2178	3406	5921	4393	3.3	4801	4748	7636	4.8	3506	7253	5136	4102	4162	4174	5181	3543	3591	3.51	3911	2798	4282
DNAJB1	14.9	16.24	11.44	12.44	13.27	12.14	11.98	12.24	11.62	12.85	11.38	11.89	11.65	11.53	11.59	13.08	12.34	12.61	11.87	11.37	13.04	11.94	12.18	11.48	11.54	13.17	11.64	11.01	11.76	10.65	11.87	11.09	12.23	11.88	11.51	11.69	11.88	11.5	12.52	12.18	11.77	11.18	11.55	11.36	11.72	10.75	10.92	11.58	11.46
S100P	13.62	11.78	11.7	10.34	11.3	7981	8705	9391	8761	9.68	8419	7553	10.61	8.25	8.38	11.39	8976	9431	8312	10.35	9442	8.12	10.96	8891	7568	6729	7138	4975	11.04	2271	8567	7831	7084	9.28	0.523	9321	12.48	8.87	9128	8534	8933	6494	7.24	7617	8084	3652	5617	8073	10.37
COL5A3	5944	5.11	9.28	5487	6462	6082	6213	7185	6964	7057	7345	6681	8729	6929	8116	7163	6737	6.82	4.9	8063	6399	7775	7423	7423	4442	6573	5716	4.57	5591	5972	6758	7619	7244	3484	6008	7575	6696	6316	5933	7527	5531	6946	6461	6456	7117	6598	6238	4371	5.73
ITGA3	12.52	12.01	12.11	11.8	11.56	11.58	11.79	10.92	11.06	11.45	11.2	11.52	10.8	10.74	11.37	11	10.25	9931	10.73	11.79	11.49	11.2	11.41	11.55	11.42	11.78	10.71	10.99	10.48	9.91	10.74	11.08	10.58	11.17	10.98	11.39	11.43	11.2	10.42	11.64	10.77	10.55	10.22	11.3	10.7	9685	10.38	11.9	11.06
ITGB7	7437	7236	7904	7301	7.03	6291	6659	7	6873	6756	6.33	6197	5445	6569	6246	5876	5646	5822	5096	7164	6464	7552	6745	6175	5226	6458	5531	6519	7418	4738	6487	6377	5981	5834	7623	7072	7084	7.83	5453	7335	6528	5677	5882	6984	8109	5903	5592	7044	7147
ITGB8	10.45	10.52	10.42	11.83	10.28	10.06	11.04	9369	10.74	10.76	10.47	9037	8038	10.01	10.32	9501	8954	7205	8438	11.2	10.03	8854	8344	9962	9.62	10.06	8603	10.67	10.01	8142	8.83	10.18	8754	9432	11.23	10.46	9155	7181	9372	10.37	7267	9449	9428	10.07	8989	10.16	10.25	10.66	9931
MSN	11.92	11.27	12.26	12.06	11.32	12.12	11.94	12.07	12	12.03	12.72	10.05	11.77	11.74	12.69	12.91	10.99	11.92	10.6	12.66	11.74	11.72	10.16	12.63	11.93	12.11	10.81	11.13	11.78	11.54	11.15	11.7	12.01	11.45	12.31	12.95	11.49	11.21	11.3	11.89	9656	11.62	11.71	12.22	11.82	11.3	11.68	11.42	11.87
DDX6	11.79	11.89	11.64	12.15	11.72	11.83	11.99	11.84	11.99	11.64	11.96	11.18	11.41	11.67	11.54	11.8	11.69	11.92	11.95	12.03	11.53	11.43	10.97	11.85	11.98	11.84	11.94	12.23	11.76	10.45	11.29	12.26	11.36	11.65	11.84	11.8	11.62	11.01	11.66	11.65	10.71	11.32	11.39	11.99	11.53	12.32	12.31	11.46	11.69
CTNNA2	2356	1279	2846	1911	3636	3531	1272	1.23	2359	2187	2314	1834	5.76	4868	7488	3553	3468	0	1668	2192	2032	3606	3552	2866	1819	0.8548	3724	1548	2.07	7713	4.77	1906	2468	4.83	7722	3728	3506	5595	2.57	3042	2386	3772	4587	2901	3388	2257	2272	1718	0.7306
EEF1G	14.67	14.91	13.69	14.61	14.65	14.68	14.72	14.94	13.92	14.48	14.02	15.35	14.96	14.06	14.36	14.71	14.82	15.06	15.02	13.93	14.53	15.4	15.81	14.35	14.93	14.99	15.19	14.16	14.49	14.46	14.65	14.8	14.35	14.89	13.88	14.62	14.76	15.8	15.12	14.6	16.22	14.6	14.42	14.87	14.93	14.76	14.3	14.32	13.92
KLRK1	5899	6576	6776	7244	6433	5172	5198	6045	5948	6021	4.66	5124	4.01	4819	4775	4679	5048	6335	5164	5931	5128	6368	5542	4662	4338	4931	3568	4.82	5626	6492	5056	5781	3836	5051	3628	6307	5846	5829	5311	5749	5645	5051	4.22	5925	6604	3989	4753	4855	5377
CD27	4.69	6139	6914	6492	4819	5551	5898	6.58	5542	5406	4901	5113	5185	4694	4.15	7095	4927	8.08	5661	6404	5111	7773	5913	6	4344	5512	4788	4.53	7611	8656	5422	5923	5846	5702	5068	6437	6094	8578	4.94	6477	6677	5197	4922	6667	8574	3956	5492	5812	5676
YWHAQ	12.44	12.47	12.23	12.69	12.45	12.68	12.64	12.83	12.72	12.87	12.76	12.47	12.66	13.08	12.57	12.89	13.18	12.41	12.95	12.48	12.68	12.64	12.16	12.54	13.01	12.54	13.04	12.92	13.46	13.38	12.77	12.89	13.02	13.25	12.6	13	12.07	12.39	13.1	12.56	12.35	13.18	13.39	12.98	12.76	12.91	13.27	12.52	13.05
MAPK3	10.21	10.35	10.65	10.43	10.56	10.41	10.72	9901	10.01	10.22	10.17	10.63	10.42	9916	10.7	10.52	9444	10.11	10.02	10.42	10.22	10.57	10.6	10.62	10.18	10.58	9497	9584	10.18	10.59	10.19	10.01	10.27	10.31	10.09	10.65	10.88	10.95	9949	10.4	10.67	10.04	10.24	10.21	10.29	10.18	9525	10.47	10.16
ATP6V0C	11.03	11.94	11.29	11.27	11.89	11.79	11.7	11.82	11.08	10.99	11.16	12.84	12.18	11.35	11.68	12.17	12.08	11.61	12.18	11.16	11.65	12.25	12.55	12.13	12.05	12.07	11.61	11.29	11.48	11.68	11.58	10.96	12.12	11.6	11.93	11.35	12.04	12.57	12.09	11.42	12.31	12.08	12.12	11.37	11.96	11.1	10.99	11.51	11.51
DPP4	11.38	12.88	12.57	11.51	13.41	13.26	13.26	13.7	12.65	12.95	12.2	12.86	10.84	11.71	12.03	12.48	12.51	7845	12.24	11.63	13.73	11.5	12.27	13.09	12.37	12.21	10.87	14.08	12.92	7177	13.16	12.25	12.2	13.49	12.18	11.42	11.88	12.69	11.7	13.21	11.88	12.27	12.41	12.18	12.6	12.7	13.47	13.31	13.32
COL8A1	5609	4315	8.94	6746	6242	8498	7771	8143	6.95	7124	7868	5529	9799	8293	7594	8.96	6349	6287	5889	8943	7161	7648	5143	6421	7	6972	6.45	7444	6588	9937	6259	8544	8473	5197	8284	8243	6484	6547	6693	7905	2699	8097	8151	8479	7.68	9382	8184	7131	7333
CALR	13.8	14.56	13.76	13.75	14.47	14.62	14.2	14.56	13.99	13.97	14.49	15	15.37	14.38	13.94	14.8	15.16	14.6	15.16	13.83	14.27	14.69	15.08	14.67	14.98	13.87	14.5	13.75	14.09	14.4	14.77	13.91	14.74	14.8	14.14	14.01	14.43	15.38	15.09	14.23	15.55	15.13	14.81	14.84	14.67	14.61	15.24	14.52	14.34
PIK3R1	12.04	11.4	11.79	10.93	9888	11.17	11.92	10.02	12.24	10.72	11.97	10.04	10.37	11.53	11.3	11.56	10.3	9468	10.36	12.02	11.27	10.57	9172	10.38	10.42	11.15	9461	11.67	11.45	10.65	10.82	11.59	9905	10.77	12.19	11.8	9831	9083	9883	11.21	8585	10.25	10.95	11.27	10.47	10.84	11.49	10.72	11.41
ITPKB	9952	10.14	10.87	10.91	11	11.17	10.75	9384	10.77	10.82	10.99	10.71	9937	10.76	12.14	10.25	11.02	10.26	10.45	10.8	11.22	10.21	10.81	11.29	10.62	10.76	11.18	11.07	10.48	10.25	10.82	11.01	10.23	10.64	11.13	10.66	10.56	10.21	10.23	10.53	10.02	10.32	10.65	10.8	9.81	10.83	11.1	11.24	10.73
HLA-DMB	8778	8929	8894	9646	7664	8745	8582	9652	9308	9043	9291	8543	8784	8.63	7635	8.91	7922	7903	8419	9586	8903	11.75	8296	7.38	12.19	8.42	11.78	9011	10.52	10.11	8901	10.26	9367	7634	8.7	10.14	8821	9957	8448	9125	8709	9219	8552	9969	10.3	8326	14.36	9679	9338
PSMB6	10.43	10.95	10.16	10.3	11.03	10.54	10.54	10.67	10.28	10.33	10.41	11.7	10.77	10.27	10.87	10.96	10.48	11.59	11.32	10.1	10.84	11.46	11.87	11.3	11.21	10.93	10.8	10.22	11.06	11.17	10.88	9.86	10.69	11.08	10.75	10.73	10.94	11.96	10.65	10.52	12.08	10.89	10.71	10.9	10.72	10.17	10.21	10.56	10.75
MAPK1	11.32	11.25	11.51	11.43	11.03	11.74	11.7	11.27	11.81	11.5	11.89	10.59	11.61	11.89	11.42	11.49	11.24	11.49	11.27	11.74	11.41	10.59	10.13	11.39	11.44	11.34	11.13	11.84	11.69	10.84	11.43	11.64	11.67	11.67	11.46	11.76	10.77	10.3	11.36	11.37	10.18	11.52	11.77	11.48	11.24	11.69	12.07	11.57	11.79
DUSP1	14.87	14.68	14.43	13.3	15.53	13.77	14.66	12.04	14.76	14.19	14.36	12.36	12.31	14.1	14.31	13.32	14.51	13.49	12.4	14.15	13.95	13.07	14.69	13.61	13.36	13.97	12.01	13.4	13.43	11.18	14.92	14.13	14.17	13.63	13.44	14.52	14.59	11.9	12.95	14.5	14.01	12.91	12.43	13.02	13.15	13.38	13.18	14	14.08
PTPRM	10.68	9929	10.4	10.09	9686	10.08	10.23	9876	10.7	9986	10.41	9016	10.37	10.58	10.25	10.1	10.68	9.66	11.05	10.66	10.55	9591	9321	9423	9618	10.17	9708	9829	9883	9628	11.89	9743	11.54	10.01	11.89	10.11	9545	11.05	11.48	9838	9715	11.04	11.86	9826	11.12	9677	9998	9613	10.19
LAP3	10.34	10.37	10.1	10.54	10.05	10.3	10.31	11.21	10.54	10.41	10.56	10.43	10.69	10.13	10.52	10.46	10.21	9841	10.09	10.48	10.29	10.84	10.04	9899	10.2	10.11	10.22	10.68	10.78	10.26	10.49	10.21	10.61	10.36	10.18	10.6	10.11	10.03	10.53	10.5	10.26	10.48	10.34	10.53	10.8	10.1	10.42	10.34	10.58
CD34	10.12	8924	10.75	9198	8304	10.3	9568	8697	9845	9525	10.2	8159	10.66	9771	10.46	10.51	8854	9508	8.44	10.45	8775	10.21	9.64	9451	8624	9631	9007	8.18	9.78	9685	9246	9789	10.02	9015	9433	10.57	9.63	10.18	8478	9733	9425	9508	9541	10.18	9982	9606	9536	8801	9945
ADORA2A	5267	5787	6.53	6708	5407	6152	5141	6377	5773	6226	5993	5723	6.09	5379	5992	6.09	5513	7362	5807	6343	5553	7335	7427	5558	4717	5665	6068	5022	6564	7236	5896	6.09	5451	5272	4856	6823	6601	7227	5101	6615	7121	5284	5251	6372	7227	5338	5358	5734	6127
EPHA2	13.71	12.29	12.87	11.68	10.76	11.25	10.56	9262	9837	12.24	9615	8068	9826	10.13	10.15	11.15	10.84	9443	8.83	11.21	9113	9269	9.19	8892	8702	9856	8571	8168	10.09	7779	9462	8934	8834	9579	8803	9906	10	8535	10.16	10.7	7806	7082	7797	8578	8472	7155	7462	8836	9165
EPHA3	9332	7.85	10.5	9459	8876	10.69	10.34	9446	10.82	9411	11.34	7695	11.13	10.49	8702	11.24	8318	10.23	8584	11.49	8559	9.31	7.94	9778	8569	9827	8498	8966	10.61	10.19	9235	10.26	9.81	8669	6941	11.78	7958	7946	8827	10.07	6737	8955	9542	10.15	9632	9.98	10.58	9189	10.41
EPHA8	0	1.05	0	2038	1051	2601	0.4368	0.5347	1616	1182	0.5276	2199	2855	2498	2389	1228	1175	0	3698	1.71	2281	4281	1052	1421	2335	1146	5977	1834	0.848	6536	1481	4443	0.9793	1745	0	1368	2925	2884	1795	1645	0.8839	1781	0.7824	5316	2227	1531	4333	0	0.411
PTPN6	9627	9818	9596	9644	10.02	9541	9448	9647	9593	9575	9306	10.05	9456	9377	9235	9.58	8856	10.25	9582	9839	9773	10.17	10.09	9743	9512	9672	9322	9333	9717	9491	9801	9353	9579	9427	9615	9452	10.04	10.53	9635	9673	10.24	9733	9572	9.68	10.22	9618	9285	9955	9617
SHC1	11.9	11.2	11.58	11.24	11.22	11.19	11.08	11.53	11.11	11.54	11.48	11.15	11.2	11.05	11.57	11.65	11.1	11.87	10.8	11.38	11.36	11.29	11.08	11.53	11.3	11.34	11.8	11.07	10.93	11.07	11.14	11	11.17	11.16	11.73	11.55	11.57	11.02	11.31	11.42	11.18	11.3	11.17	11.22	11.15	10.73	10.93	11.14	11.09
IL12A	0.8672	1806	1947	2038	2822	1427	1797	1697	2.96	2773	2655	1834	1503	2141	2103	2195	1175	2454	2421	1971	1889	1421	2543	1814	1332	3049	1491	1548	2433	0.629	1134	0.9377	1557	1905	0.9059	3811	3381	1645	1956	3184	1638	1299	1.66	2146	3152	1531	0.8885	1906	1574
IL12B	0	1.05	1.28	1772	0	0.8833	0.7716	3252	0.9143	1011	1217	1344	1303	0	1271	1695	1814	3499	0	1971	0	2946	2404	1976	0.5906	1937	0.5385	1.38	3.17	0	1318	1649	1969	0	0	0	1528	2532	0.8664	1434	2498	0.5725	0.7824	2146	2.52	0	1187	0.938	2103
PML	10.51	10.95	10.73	10.6	10.65	10.84	10.56	11.2	10.29	10.4	10.43	10.44	10.06	10.4	10.55	10.98	10.01	10.66	10.4	10.63	10.59	10.86	10.55	10.82	10.42	10.65	10.33	10.41	9.65	10.36	10.35	10.19	10.37	10.17	10.84	10.62	10.89	10.65	10.26	10.55	10.61	10.43	10.16	10.68	10.69	10.05	10.11	10.46	10.03
EEF1D	13.15	13.54	12.62	13.19	13.74	13.28	13.36	13.59	12.68	13.08	12.62	14.76	13.61	12.77	13.33	13.52	13.48	14.22	13.87	12.7	13.4	14.45	15.25	13.56	13.66	13.94	13.56	12.67	12.93	14.43	13.18	12.84	13.57	13.88	13.04	13.42	14.05	14.9	13.7	13.53	15.29	13.34	13.39	13.52	13.74	13.64	12.41	13.26	12.68
CD40LG	2668	2583	5964	4673	3866	3632	3622	5205	4944	3927	3919	1.61	3122	2967	2103	4339	2985	5238	2561	4528	3514	5133	1653	3.97	1819	1937	1893	3573	5.44	2693	4393	3881	4441	3.01	2168	3811	4502	6.03	2667	3593	3774	3136	2971	3878	5.73	2788	3951	3278	4569
MARCKS	11.72	12.15	11.83	12.72	12.83	11.8	11.94	12.14	11.65	12.03	11.34	12.1	12.15	11.64	12.01	11.64	12.28	11.64	11.37	11.69	12.23	12.27	12.28	12.26	12.2	12.29	11.56	12.93	11.39	11.13	11.17	11.85	11.55	11.85	10.19	11.65	12.43	11.69	11.53	12.25	11.87	11.74	11.79	12.23	11.69	10.55	12.13	12.22	11.81
PRDX6	12.04	13.09	11.9	12.29	12.73	12.3	13.17	12.3	12.79	12.33	12.34	13.54	12.75	12.29	12.26	12.48	12.44	12.72	13	11.82	12.73	13.49	13.1	12.97	13.38	12.61	12.7	12.55	13.24	12.71	12.71	12.43	12.61	13	12.69	12.38	12.96	13.43	12.47	12.45	13.16	12.48	12.59	12.77	12.77	12.03	12.69	12.45	13.19
RPL12	13.43	13.83	12.69	13.56	13.91	13.49	13.47	14.31	13.18	13.65	12.83	14.33	14.26	12.95	13.52	14.59	13.76	15.02	14.65	13.02	13.79	14.47	14.9	13.75	14.05	14.18	14.31	13.19	13.64	13.67	13.48	13.81	14.2	14.43	12.98	13.56	14.41	15.17	14.52	13.57	15.31	13.59	13.62	14.34	14.31	13.99	13.46	13.1	13.22
PDIA3	13.24	13.94	13.02	13.43	13.86	13.87	13.39	13.59	13.57	13.43	13.9	14.38	14.46	13.3	13.32	14.08	14.48	14.38	14.9	13.26	13.83	14.07	13.95	14.2	14.69	13.33	14.04	13.41	13.54	13.52	14.31	13.23	14.54	14.24	13.8	13.23	14.02	13.95	14.68	13.41	14.4	14.66	14.1	14.49	14.19	14.36	15.22	13.74	13.72
PPP2R1A	12.71	13.08	12.59	12.5	13.25	12.96	13.01	13.1	12.5	12.52	12.66	13.62	13.26	12.51	12.9	13.18	12.67	13.77	13.37	12.41	13.05	13.42	13.76	13.29	13.27	13.23	13.21	12.68	12.53	12.81	12.89	12.52	13.04	13.19	12.55	12.8	13.23	13.4	12.78	12.9	13.92	12.92	12.91	13.03	12.86	12.57	12.47	12.93	12.66
CD6	6479	6687	7426	7482	6136	6417	5405	7739	6445	6201	5073	5607	5445	5.78	5392	6449	5452	7597	6143	6828	5.89	8169	6348	5366	4442	5358	5398	5859	7767	6947	6.06	6077	5.74	5315	3347	6503	6772	8847	5398	6557	7623	5846	5442	6814	8358	5.12	5838	5963	6399
MIP	1405	1946	0.5619	0	1948	0	0.4368	1697	0.9143	1715	1468	0	1503	2036	1271	1882	1175	3555	1397	0.4054	1347	2592	1052	0.5052	1008	1146	1237	1.38	1585	2565	1481	0.9377	0.7205	1745	0.523	0.4804	0.9574	1645	1795	1992	1428	1972	1287	1874	0	0	2611	0.938	1213
AXL	9878	9951	11.13	10.58	10.13	10.45	10.44	10.54	9978	10.48	10.4	9876	9944	9842	10.84	10.52	9078	9941	8832	10.73	9795	10.3	9528	10.28	9514	10.69	8187	9658	9679	10.57	9373	9648	9973	9147	9.73	10.64	10.02	10.03	9373	10.08	8.66	9422	9453	10.16	9771	9407	9602	9759	9628
CORO1A	8606	9154	9622	9722	8735	8901	8543	9519	9.14	8958	8714	9083	8.07	8229	8056	8.89	7966	9395	8594	9.84	8353	10.41	9431	8399	8125	8401	7536	7789	10.17	8918	8.89	8757	8633	8134	7021	9753	9825	11.04	7961	9389	9971	8438	8179	9338	10.68	7662	8095	9418	9183
S100A7	0.4978	0.4401	0.5619	0	0.4407	0	1469	1.23	3805	1182	0.5276	0	0	0.3896	0	0	0	0	1397	0	0	5497	1052	0.5052	0	0.8548	0.9298	0	7302	3978	0	0.3843	0	0.8351	4306	0.4804	0	0.6151	0	3431	0.5086	0	0	0	0	0	0	0	1726
HOXD3	3.74	1651	5686	2627	1948	3582	2391	1697	3.3	3997	2844	1834	4246	3872	4128	1882	1814	3316	3014	5743	2.59	2.72	4589	2592	1596	5428	4289	2178	4446	3509	2976	4892	2772	2179	8914	3851	2925	2393	2355	3541	0.5086	5833	4248	2901	3823	2685	2799	2594	5181
HOXA7	7119	7355	7452	7458	7469	7151	7212	5045	6.95	7081	7193	7751	5.71	6645	8.03	7406	5.52	5739	5859	7413	7604	6709	7066	7997	7231	7674	5202	7178	6955	6913	7.78	6411	6917	7507	7.92	7599	7252	7083	5629	7357	6315	6379	6.54	7063	6634	5754	6.54	7609	7127
SDC4	12.85	12.65	12.43	12.87	12.53	11.79	12.52	11.88	11.93	12.28	11.6	11.92	11.23	11.11	12.39	12.95	11.86	11.98	12.58	12.17	11.84	12.05	11.92	12.06	11.83	12.42	10.67	11.78	11.69	10.88	11.25	11.4	11.06	11.87	11.88	11.75	12.65	11.23	11.41	11.98	11.23	10.3	11.22	11.77	10.93	11.19	10.95	12.14	11.49
SLC6A4	2844	3458	4.79	2362	1.28	4291	3987	1483	3256	2265	2.55	2199	0.4508	2417	2103	1695	1814	0.9231	2561	2841	2919	0	3089	2866	2921	6542	3512	4.59	3609	1.4	1995	3583	1389	2862	3862	4036	0.9574	1376	1404	1434	1181	0.9813	1057	3986	1366	0.3059	0.8885	0.938	4181
AKT1	12.1	12.46	12.33	11.92	12.56	12.4	12.39	12.5	12.24	12.3	12.41	12.21	12.62	12.68	12.52	12.42	12.51	12.74	12.93	11.94	12.49	12.22	12.03	12.81	12.83	12.45	12.51	12.21	11.93	12.34	12.81	11.89	12.52	12.52	11.73	12.28	12.47	12.84	12.64	12.45	12.28	12.86	12.74	12.4	12.51	12.32	12.15	12.45	12.22
ATIC	9976	10.04	9826	10.37	10.46	10.09	10.4	10.73	9915	10.32	9943	10.95	11.45	10.28	10.67	10.44	10.08	10.44	10.78	9908	10.17	10.5	10.95	10.6	10.81	10.65	10.27	10.25	9823	11.18	10.25	10.5	10.64	10.3	10.48	10.19	11.14	10.9	10.56	10.42	10.93	10.68	10.48	10.63	10.2	10.39	10	9969	9948
YWHAB	12.73	12.58	12.45	12.63	12.13	12.48	12.51	12.29	12.57	12.47	12.64	12.37	12.63	12.66	12.42	12.4	12.16	12	12.52	12.63	12.35	12.31	11.98	12.23	12.5	12.56	12.31	12.75	12.54	11.92	12.31	12.35	12.52	12.73	13.03	12.69	11.98	11.81	12.15	12.47	11.66	12.44	12.51	12.49	12.32	11.91	12.65	12.44	12.68
SFN	13.55	13.09	11.76	12.43	13.29	11.96	11.96	11.74	11.68	13.4	10.57	13.39	10.63	11.46	10.98	12.21	12.63	10.61	12.7	11.22	11.57	12.52	13.01	11.65	12.43	12.46	9329	11.33	12.33	11.55	11.81	10.14	11.62	11.88	8965	11.83	12.91	13.01	11.76	11.22	12.67	11.02	11.62	11.32	10.94	10.72	10.64	11.44	12.06
S100A11	13.16	13.49	12.4	12.88	13.19	12.16	12.56	12.14	12.23	12.63	11.6	12.56	11.79	11.93	12.2	12.75	12.01	12.65	12.97	12.16	12.41	13.13	12.43	12.98	12.97	13.09	11.18	12.06	12.51	12.78	12.44	11.53	12.27	12.44	13.04	12.1	13.39	13.49	12.14	12.12	12.02	12.09	12.47	12.6	12.16	11.59	11.49	12.05	12.29
FCGR2B	5547	3966	6.14	6285	4555	5238	5198	5257	6195	4693	5932	4165	5659	5028	4699	6002	3763	5787	3572	6.62	4259	6481	4741	5075	4408	4379	5089	3947	6564	6214	5358	5.21	6129	3267	4856	6925	5308	6454	4612	5041	4766	5303	4671	5485	6507	5771	4634	5476	6999
CEACAM8	0	0	0	0	0.7778	0	0.4368	0	0	0	0	0	0	0.3896	0	0	0	0	0	0	0	0	0	0	0	0.4897	0.5385	0	0	0.629	0.3771	0	0.4047	0	0	0	0	0	0	0	0	0	0	0	0	0.3059	0	0	0
L1CAM	5865	3.41	8666	6.75	7483	4953	7058	5641	6779	7458	7725	6751	4353	6521	10.05	6182	6233	4801	3572	7.44	6412	5497	5685	8089	5936	6312	3865	4646	5426	6528	5536	6464	7437	4769	9465	8423	5238	4867	5768	7182	5435	7509	7471	7735	6272	4816	6.45	6334	5969
PRDX2	11.78	12.2	11.46	11.49	12.46	12.04	12.1	12.02	11.73	11.67	11.91	13.24	12.91	11.81	12.31	12.44	12.03	12.46	12.89	11.42	12.52	12.72	13.21	12.73	12.63	12.38	12.45	12.03	12.52	12.36	12.29	12.05	12.3	12.59	12.22	12.17	12.33	13.27	12.38	11.99	13.23	12.59	12.41	12.43	12.21	12.04	11.84	12.04	12.3
CCR1	4996	4919	5838	7203	4955	5889	5381	7652	6806	6701	6729	4123	6238	6409	4871	5688	4963	5489	4.51	7.01	4886	6796	4344	5322	4225	5315	4506	5777	6545	5483	5.6	6278	6299	4026	4274	7844	6358	5787	5913	5737	3981	5704	5622	6437	6482	5571	5402	5562	6021
CCR7	6505	8394	6348	7677	8322	5155	5198	6613	6359	5828	4871	4245	5104	4972	6085	5961	6133	8932	5764	6343	5871	7431	5758	6872	4301	8268	5235	4511	7.74	4905	5.4	6413	5534	5197	6275	6582	6163	7432	4256	5869	6127	4745	3561	6576	8.21	3569	6294	5086	5766
CXCR5	3208	2496	2747	2851	1808	1638	3816	1.23	2085	2265	3589	2352	2106	1799	2103	2947	3383	6337	3504	3838	3125	3606	3849	4373	2473	2083	2343	1958	5.95	1672	1995	2629	2.19	2179	2425	4.78	1939	5872	1796	3.25	3241	2669	1816	3041	6627	1939	2506	2976	2925
GBP1	9384	9782	9351	10.26	8813	9671	8928	10.46	9586	10.03	10.34	8076	8786	9014	9452	9929	9.12	8637	8.18	10.26	8359	9762	7741	8934	8128	8773	7066	9393	9867	8984	8507	8535	8.63	8191	9996	10.25	10.04	8.06	8881	9345	7359	7.74	8214	9575	9586	8197	8272	8124	9229
DSG3	9343	8853	7794	8195	6255	5.94	7339	7586	8162	7987	6925	5206	7122	7806	7218	9063	6517	4492	5835	8325	5842	6.56	4981	6334	6.33	6773	5.05	7201	6.98	1066	6809	6736	5232	6129	2168	7754	7332	5933	4431	6904	3729	3666	4671	6517	4625	2788	3643	5.83	5834
ICAM3	7641	8588	8326	8134	8376	8363	8214	8.37	7938	7919	7.83	8838	8177	8306	7457	8741	8344	9584	9262	8182	8359	9467	9319	8315	8507	8231	8484	7585	9239	8559	8684	8222	9004	8771	7338	8578	8888	10.92	8661	8381	9.98	8912	8578	8726	9433	8.58	8344	8409	8.45
RPL9	11.23	11.39	11.36	11.46	8623	11.07	11.29	8385	11	11.24	6997	8791	11.18	7363	11.4	7946	7929	9302	8491	10.84	7962	12.25	13.07	11.49	8091	11.75	8196	10.97	11.82	8105	7733	11.02	7791	11.98	11.66	8318	11.7	12.59	11.63	11.32	13.15	11.09	7665	11.52	11.49	8086	7384	7.5	11.06
CD70	0.8672	1.05	1538	2154	1051	0	0.7716	0.9239	0.3728	0	0.913	1344	0	1.35	0.5568	1.48	1175	3499	1668	1391	1.11	2122	1384	1421	1332	1388	1237	0	3609	1.9	0.923	0.9377	0.7205	0.8351	0	2617	2253	2776	0	2272	1181	0	0.4436	1715	2.52	0.5582	0	1247	1726
CDH5	9358	7478	9707	7866	6648	8.97	8314	8515	8702	8498	9629	6304	9866	9031	8967	9799	7876	9367	7837	9634	7855	8.77	7756	8433	7374	8.3	8598	6644	8.39	8577	8154	8953	9.34	7898	8139	9.53	8465	8401	8047	8.69	7692	9151	8625	9316	9183	8627	8618	7697	8856
KIF5B	12.26	11.95	12.33	12.35	12.59	12.29	12.27	12.27	12.53	12.36	12.67	11.65	12.17	12.46	12.58	12.07	11.81	12.55	12.12	12.58	12.12	11.59	11.33	12.24	12.26	12.01	11.96	12.93	12.67	12.1	11.86	12.71	12.18	12.34	12.11	12.57	10.75	10.47	11.89	12.08	11.25	12.22	11.7	12.33	12.04	12.22	12.78	12.17	12.46
CD80	2759	1477	2846	2918	0	0.5082	1469	4707	2439	2662	1468	0.5975	2105	1163	1936	1882	2255	2331	0	3287	1347	3467	1384	0.5052	1332	1146	0.9298	2072	4154	3019	2197	2123	3022	0	1208	1753	4006	1871	2234	3042	0	0	2.31	2826	3459	1644	1645	0.5439	2723
CTNNA1	12.99	12.9	13.01	12.91	12.85	12.89	13.04	12.99	12.95	12.81	13.01	12.58	13.28	12.98	13.08	13.04	12.73	12.26	13.04	12.96	13.08	12.99	12.19	12.89	13.07	12.92	13.19	13.04	12.5	12.91	12.82	12.99	12.9	12.87	13.07	12.74	12.47	12.46	12.81	12.86	11.81	13.06	13.38	13.02	12.72	12.96	12.96	13.05	12.77
CTNNB1	13.15	13.1	13.11	13.45	12.81	13.24	13.39	13.1	13.34	13.18	13.35	12.84	13.09	13.23	13.05	13.19	13.27	12.2	12.53	13.36	12.9	12.79	12.36	12.47	13.09	12.88	12.56	13.35	13.3	13.22	12.77	13.27	12.77	13.09	12.74	13.48	12.16	11.88	12.91	13.32	12.39	12.94	13.28	13.3	12.9	13.22	13.22	13.19	13.41
NF2	9262	9.54	9806	10.26	9632	10.36	9373	9187	9932	10.09	9821	9799	10.31	10.21	9.97	9625	10.11	9964	9.92	9.98	9608	9774	10.49	10.02	10.07	9506	10.49	9988	9608	9636	9882	10.17	9.88	9715	10.23	9867	10.14	9989	9666	9588	10.45	9957	9871	9497	9736	9965	10.07	10.22	9959
RDX	10.65	10.1	10.68	10.24	9526	10.36	10.41	10.15	10.78	10.51	11.09	9.19	11.09	10.57	10.26	10.12	10.14	10.21	9741	10.87	9878	9626	8207	9706	10.29	9745	11.05	10.41	11.02	10.1	10.15	10.8	10.13	10.22	10.62	11.07	8942	8111	9966	10.34	8557	10.15	10.14	10.63	10.19	10.79	11.28	10.37	10.76
SFTPD	4939	6325	4.74	4711	5199	5794	5999	5038	5254	5405	4685	6907	4274	4806	4007	5202	5.41	5626	5269	4663	5221	5.83	7788	5.26	5675	5721	5302	4.93	6.15	4075	5617	4719	5641	6311	3905	4.65	5588	7.45	5.28	5387	7392	5192	5223	5521	6003	4932	5328	4922	5.33
RPL22	12.84	13.22	12.18	13.25	13.22	12.79	13.24	13.21	12.73	12.91	12.49	13.5	13.44	12.47	13.11	12.89	12.89	13.31	13.44	12.62	13.03	13.64	13.81	13.16	13.48	13.36	13.53	12.89	12.79	12.99	12.82	13.14	12.93	13.25	12.56	12.96	13.37	13.86	13.51	12.88	13.72	12.88	12.79	13.42	13.23	12.96	12.96	12.58	12.51
OPRM1	0	0	0.5619	0	0	0	0	0	0	0.5922	0	0	0	0	0.9576	0	0	0	0	0	0	0	0	0	0	0	0	0	0	0	0	0	0	0	0	0	0	0	0	0	0	0	0	0	1037	0	0	0	0
THBS2	8673	5987	8362	8181	7014	9303	8.42	9293	8465	8152	8576	7156	10.23	9502	8571	9.38	7591	8922	8085	9441	7732	8.89	8118	8.44	8385	7.93	7699	7561	7922	12.49	7266	9.15	9.43	7458	7472	8896	7845	8.5	8314	9291	6998	9038	8684	9198	8767	9967	9004	7463	7462
THBS4	5103	9564	8958	7931	7158	9109	7794	11.95	9026	9882	6422	10.15	6434	9392	8124	10.71	10.1	5.81	8998	6931	8899	10.66	10.63	10.47	8847	6289	7269	9.18	8833	13.42	8337	7368	12.64	8191	7092	5.5	8897	11.73	10.61	8972	8.8	11.23	10.97	10.43	10.71	12.47	10.7	10.63	8073
FBN1	9681	6992	11.1	9417	8502	10.48	10.28	9731	10.38	9944	11.23	8304	11.2	10.46	10.93	11	8663	9.27	7777	11.34	9642	9541	8961	10.2	8832	10	8187	10.02	9661	10.44	9236	10.98	10.49	8901	10.6	10.98	8583	8838	9124	9425	7747	9.95	9898	10.32	9.57	10.46	10.82	9112	9887
MYH9	14.37	14.2	14.86	14.21	14.25	14.59	14.68	14.31	14.17	13.96	14.58	13.52	14.63	14.56	14.59	15.04	14.02	13.6	13.7	14.82	14.39	14.12	13.32	14.42	14.18	14.29	13.91	14.52	12.87	14.52	13.89	14.31	14.06	13.6	14.3	14.13	13.85	13.56	13.93	14.24	12.59	14.37	14.2	14.38	14.11	13.95	14.2	14.15	13.51
MYH10	10.57	10.43	11.29	10.79	10.61	11.34	11.51	11.85	11.42	11.02	11.35	10.22	11.94	11.54	10.88	10.89	11.2	10.03	10.57	11.54	11.03	10.39	10.16	10.69	10.84	10.78	11.58	11.4	10.35	10.91	11.43	11.68	11.22	10.87	11.57	11.01	10.2	9879	11.27	11.55	10.2	11.56	11.97	11.16	11.14	11.31	11.43	10.87	11.09
ACTN2	3.55	1477	3185	2.78	4441	4765	0	1697	6806	3775	8136	1344	1503	5081	8836	1695	0.7039	5075	1063	3238	5963	2297	2995	5969	2183	5059	2059	4169	2202	0	2373	4964	4715	10.67	0.523	6272	2734	2393	1612	1434	1638	2554	3516	1538	2763	8044	3042	6429	3307
ADD1	12.49	12.63	12.91	12.57	12.7	12.92	12.99	12.5	12.7	12.6	12.93	12.79	12.72	12.81	13.26	12.8	12.53	12.3	12.4	12.82	12.91	12.63	12.82	13.1	12.67	12.99	12.5	12.77	12.4	12.52	12.65	12.66	12.69	12.65	12.85	13.13	12.36	12.49	12.38	12.55	12.55	12.63	12.67	12.62	12.39	12.47	12.47	12.7	12.65
ADD2	4589	6418	6331	4106	4368	4161	6844	4.55	7461	6617	4152	4.59	6823	5755	4672	4307	3829	2454	6863	6393	4.96	5156	5607	4614	5476	4262	6944	4449	7204	4678	4832	5198	5705	4593	2425	6172	5981	3726	3693	5327	4468	3772	4104	5201	4655	6.67	5078	4128	8461
BSG	12.59	13.26	12.89	12.58	13.47	13.69	13.29	13.73	12.71	12.77	12.98	14.02	14.09	13.3	13.13	14.22	13.53	14.7	14.55	12.81	13.32	13.76	14.49	14.1	13.94	13.39	13.12	12.49	12.97	14.36	13.41	12.68	13.89	14.14	13.62	13.26	13.86	15.38	13.88	13.26	14.46	14.07	13.52	13.69	13.94	13.07	13.3	13.15	13.07
IGFALS	2759	1806	3636	2.78	3594	3.24	3887	2.95	3164	2773	2.55	3842	2434	2498	3094	2.33	3095	4098	3108	3081	2391	4362	4266	3164	2715	2549	3674	3318	3744	7663	3661	2889	2964	3144	1857	2057	3621	4171	2355	3.99	5901	3609	2084	2973	4239	2929	2272	3278	3208
KDR	9807	8.03	9943	9038	6.94	9.93	9669	8529	9646	9754	10.59	7151	10.32	10.47	9482	9445	8532	8.68	7035	10.28	8676	8538	7577	8876	8008	8439	8388	8207	9107	7835	8771	9983	9682	8942	11.36	10.72	9076	7612	7818	9.02	7231	9392	9.42	9606	9416	9744	9542	8623	9898
ARL2	9957	10.21	9973	10.07	10.68	10.33	10.47	9743	9775	10.11	10.05	11.44	10.18	9542	10.87	10.71	9822	10.43	10.55	9948	10.43	10.92	11.82	10.95	10.24	11.05	9748	9649	10.09	10.95	10.49	9574	10.59	10.59	10.55	10.69	10.99	12.13	10.27	10.4	11.57	10.41	10.27	10.23	10.24	10.16	9214	10.17	10.06
MAP2K2	10.76	11.41	11.11	10.89	11.09	11.6	11.22	11.65	10.89	10.86	10.79	12.76	11.69	11.13	11.15	11.85	11.33	11.66	12.16	10.77	11.49	12.22	12.8	11.48	11.68	11.34	11.44	10.75	10.81	11.68	11.04	10.95	11.86	11.41	10.98	11.17	11.83	12.89	11.56	11.43	13.28	11.75	11.39	11.23	11.86	11.1	10.86	11.41	10.95
RPL4	14.86	14.88	14.24	15.01	15.01	14.76	14.86	15.16	14.51	14.82	14.44	15.48	15.26	14.54	15.07	15.2	14.76	15.4	15.48	14.51	14.88	15.53	15.74	15.03	15.17	15.32	15.32	14.42	14.65	15.35	14.7	14.83	15.03	15.12	14.62	15.08	15.3	15.96	15.57	14.87	15.92	15.05	14.65	15.34	15.09	15.07	14.73	14.61	14.36
PPP1CC	11.13	11.15	11.08	11.45	11.24	11.3	11.26	11.38	11.36	11.34	11.27	11.15	11.33	11.5	11.31	11.35	11.17	11.29	11.43	11.31	11.31	11.13	11.18	11.25	11.36	11.35	11.19	11.5	11.74	11.83	11.13	11.52	11.31	11.53	11.07	11.58	11.47	11.26	11.52	11.27	11.02	11.51	11.36	11.55	11.42	11.6	11.75	11.23	11.4
ACVRL1	8243	7361	9.7	8.08	6633	8644	8075	7606	8767	8257	9327	7434	9339	8611	8.81	8.99	7229	9171	7166	9883	7364	8989	9032	8403	6811	7882	7296	6248	8947	8898	7959	8633	8115	7147	10.74	9671	8.34	8.96	7143	8344	8578	8127	7725	8668	8528	8.23	8111	7951	9231
TGFBR2	12.08	10.77	12.06	11.06	9567	11.35	11.2	10.76	11.58	11.05	11.64	9261	11.25	11.33	11.48	11.71	10.29	10.31	9163	12.1	10.73	10.67	8873	10.37	10.02	10.88	9679	10.52	11.14	10.42	10.5	11.23	11.17	10.53	11.93	12.03	9.79	9813	10.65	11.24	8995	10.62	10.76	11.27	11.02	10.99	11.22	10.51	11.25
TAGLN2	12.86	12.19	12.61	12.86	12.27	11.87	11.79	12.15	11.83	12.76	11.82	12.02	11.64	11.42	12.37	12.69	11.93	12.81	12.05	12.13	11.58	12.85	12.05	12.25	12.21	12.3	10.47	10.98	12.32	12.95	11.71	10.84	12.19	11.95	13.02	12.48	12.94	12.88	12.29	12.14	11.73	12.06	11.55	11.76	11.84	10.58	10.74	11.97	11.91
SPAM1	0	0.7768	0.9652	0	1478	0	0	1483	0.3728	0.3262	0.5276	0	0	0	0.9576	0	0	0	0	0	0.471	0	1052	1631	1008	0	0.9298	0.4011	0	0	0.6757	0	0	0	0	0.8401	0	0	0	0	0	0	1485	0.4654	0	0	0	0.5439	0.411
ITGAE	8.28	8522	7849	8432	8032	7526	7884	8364	7906	7.93	7695	9097	7925	7339	8072	7606	7903	8125	8026	7745	8177	8732	9044	7861	8061	8129	7758	7783	8555	8004	8034	7536	7541	7845	7346	8008	8293	9044	8.19	7837	9.11	8012	7.89	7879	8491	7446	7547	7697	8278
HSPA9	12.63	12.47	12.06	12.27	12.29	12.1	12.19	12.61	12.33	12.31	12.34	12.22	13.17	12.49	12.51	12.45	12.58	12.1	12.62	12.11	12.36	12.54	11.92	12.24	12.46	12.35	13	12.55	12.19	12.43	12.45	12.66	12.55	12.25	12.55	12.11	12.32	11.97	12.8	12.38	11.94	12.47	12.54	12.68	12.41	12.53	12.57	12.05	12.39
RPS19	14.06	14.2	12.94	14.1	14.32	13.56	13.91	14.57	13.21	13.91	12.95	15.26	14.35	13.45	13.98	14.22	14	15.15	14.86	13.08	14.01	15.25	16.05	14.17	14.33	14.48	14.57	13.14	13.88	14.49	14	13.9	13.99	14.53	13.33	13.94	15.1	16.14	14.72	14.13	16	13.98	13.88	14.4	14.45	14.17	13.2	13.63	13.27
RPL3	15.65	15.92	15.2	15.62	16.04	15.78	15.82	15.89	15.36	15.72	15.28	16.12	16.1	15.43	15.69	16.3	15.59	16.05	16.36	15.29	15.96	16.41	16.54	16.08	16.27	16.25	16.22	15.48	15.72	15.96	15.96	15.84	15.95	16.35	15.38	15.93	15.86	16.82	16.23	15.96	16.72	15.86	15.79	16.26	16.1	16.01	15.45	15.72	15.35
COL15A1	10.15	7.07	11.51	9529	8652	10.81	9661	10.26	10.29	10.24	10.96	8408	12.02	10.43	10.02	11.54	9407	10.07	9239	11.31	9799	10.47	8767	10.41	9469	9733	9.67	9125	9243	11.53	9296	10.64	11.44	8967	8861	10.78	9.57	9.72	9699	10.36	7973	11.03	10.52	10.1	10.52	11.07	10.82	9467	9821
COL18A1	10.97	10.57	12.24	10.84	10.61	11.82	11.47	11.02	11.33	11.02	11.75	11.35	11.96	11.29	12.06	12.01	10.86	10.74	11.04	12.19	10.96	11.84	11.94	11.8	10.85	11.2	10.86	10.64	10.21	11.89	10.98	11.38	11.67	10.55	12.06	11.88	11.15	11.64	10.93	11.68	11.84	11.4	11.21	11.55	11.68	10.46	11.06	11.01	10.71
MMP12	1405	1651	2526	6329	0.4407	2955	3887	4803	4637	2603	2032	4393	2332	4149	6594	1.48	3095	2949	2093	5625	4073	5965	1881	1175	1596	0.8548	5383	0.4011	6252	5483	3939	4225	1969	0.4772	0.9059	7262	3093	4544	2234	4.27	0	2292	1956	3341	4852	3016	5726	0.5439	5294
CAPG	11.65	12.13	11	11	11.98	10.46	11.15	10.25	10.34	10.73	9951	12.41	9364	9516	11.32	10.34	9342	9512	9866	10.68	11.28	11.73	11.59	11.03	10.71	12.12	9195	10.93	11.3	10.08	11.17	9386	10.45	10.12	11.45	10.74	11.62	11.83	9054	10.44	11.15	9.84	9.51	10.51	10.49	7878	8.95	10.36	11.3
IL6ST	10.64	8769	10.74	10.35	7837	10.59	10.6	10.5	11.12	10.4	11.72	4651	10.25	11.02	9348	10.49	9409	7013	6321	11.74	9646	6113	4183	7761	8453	8805	9422	10.99	11.12	5997	9829	11.04	9906	8.64	11.29	11.77	6438	2776	9711	10.07	3364	9862	10.12	9569	8.94	11.46	11.14	10.12	11.16
GP5	0.4978	1.05	2402	1026	0.7778	1638	1272	1.23	2273	0.8166	1867	0	1303	1.35	1746	2195	0	0	0	3334	0.8255	1083	0	1421	1008	1146	0.9298	0	1765	2097	1318	1649	1969	0.8351	2537	3277	0	0.6151	0.4973	1187	1638	1299	0.4436	1335	1037	1408	1992	0	2309
CEACAM3	1958	0.7768	1.28	2544	0.4407	0	0	1483	1307	1599	0.5276	0.5975	0	0.6959	0	1695	0	2048	0	3025	0	1694	0	1175	0	0.8548	0.5385	0.4011	2807	0.629	1761	2123	0	0.4772	0	2617	0.9574	1376	1612	0	1181	0.5725	0.4436	1335	1634	0	1187	0.5439	1405
CEACAM6	10.06	11.11	10.08	10.38	8079	8824	10.63	8289	8561	8962	8674	5831	8583	8679	7891	9227	6269	7261	6676	9967	5842	7881	7.23	7042	6061	8082	6677	5859	9361	3285	8925	7086	6407	9926	1671	8631	7635	7428	7445	9059	6495	7029	6.58	8317	7965	5.1	5772	9218	8221
CD96	7072	6967	7335	7931	6302	6267	5966	7593	6898	6098	5911	4245	4852	5705	4618	6434	5.02	7431	5876	7277	5667	7226	4879	5493	4631	5665	4815	6017	7834	5.84	6589	6494	5989	5526	4207	6777	6254	7036	5595	6449	5207	5607	5209	7048	8062	4779	6491	5415	6427
MPL	4589	4235	4815	5759	5.32	5085	5498	4209	5076	5191	5592	4967	3447	5014	5408	5184	4218	3.76	3814	5308	5.08	4799	4002	5452	4717	5455	4838	4899	4548	4796	4172	4877	5.43	4944	4.94	5764	4441	4813	4346	4531	5068	4456	4609	4728	4685	4476	4634	4877	4739
RPL13A	14.34	14.87	13.73	14.37	15.06	14.51	14.46	15.08	14.01	14.43	13.76	15.46	15.44	14.62	14.21	15	14.63	15.08	15.31	13.92	14.57	15.57	16.28	14.75	15.23	15.12	15.19	14.04	14.73	14.94	14.84	14.89	14.88	15.34	14.2	14.57	14.86	16.23	15.48	15.1	16.65	14.57	15.03	15.13	15.19	14.99	14.2	14.46	14.42
USP8	10.56	9877	10.19	10.39	9834	10.02	10.12	9826	10.45	10.45	10.51	9083	10.29	10.64	10.08	9591	9844	9193	9617	10.53	10.14	9315	8972	9589	9768	9791	10.22	10.71	10.51	9769	10.19	10.6	10.01	9868	10.41	10.41	9267	9082	9728	9.96	9056	10.03	10.11	9976	9818	10.5	10.61	10.03	10.43
IL15	5399	5265	6314	6109	5579	5434	5464	6511	6257	5714	5731	5166	5164	5133	5359	5184	4168	6092	5.58	6576	5.25	6192	6007	5162	4717	5494	3994	5004	6773	5569	5536	4862	4784	4309	5616	6412	5981	5.97	5102	5.97	5838	5051	5418	5171	6272	4676	4634	4986	6029
EIF2S3	11.66	12.08	11.35	12.36	12.11	11.87	12.05	12.15	11.78	11.89	11.68	11.92	12.48	11.98	11.77	12.15	12	12.29	12.58	11.84	11.92	12.12	12.06	11.85	12.31	12.11	12.54	12.08	11.98	12.13	11.93	12.51	11.92	12.07	11.51	11.94	12.22	12.55	12.59	11.95	12.1	12.21	12.33	12.5	12	12.46	12.5	11.88	11.72
ID1	13.17	13.13	12.35	12.07	14.09	11.34	12.13	9752	10.88	12.48	10.56	12.11	11.8	10.37	11.95	11.8	10.92	11.11	11.26	11.77	10.12	11.75	14.54	11.85	11.29	12.57	9592	9942	11.38	9679	11.87	10.26	11.07	11.12	11.75	11.76	11.89	11.15	11.04	12.42	11.54	9352	9.15	10.62	10.21	8815	8019	11.14	11.45
LEP	0.4978	0.4401	2115	0.4278	0.4407	0	0.7716	0	0.9143	0.5922	1681	0.5975	0	0.3896	5657	0.9222	0	0	0	1.2	0	0.6406	1653	1175	0	0.4897	0	0	1926	0	0.3771	0.6874	0	0	0.9059	0.8401	0.9574	0	0	0	1638	0	0	2146	0	0	0	0	0
CASR	1796	1477	1758	1251	1478	1821	1642	0.5347	2588	3412	0.913	1019	0.7939	1664	1271	0	1175	0	1397	1.71	1347	1694	0	1631	1332	0.4897	0	1548	2322	2097	1318	1906	1199	1566	1857	1128	0.9574	1045	1795	0.5115	0	1.56	1956	1538	2055	1273	0.5116	1906	1574
BCL6	11.06	9.98	10.53	10.87	9686	10.21	10.7	11.68	10.63	11.06	11.03	9139	10.47	10.01	11.28	10.97	10.84	11.77	10.36	10.27	10.53	10.71	8.81	10.85	9895	9931	9.69	9605	9586	10.33	9723	9962	9816	9635	10.91	10.19	9764	8677	11.48	10.84	8546	9194	9759	9717	9582	9206	10.13	9627	9464
CD200	9616	7.69	9163	7615	7947	8388	8137	6721	7903	7849	8907	6659	6771	7735	9531	7723	7695	8401	7105	8856	7259	7607	7523	8139	6476	8889	7007	7.1	8.63	6935	7263	7201	7709	7.61	8.71	9534	7579	6531	7252	7995	6515	6285	7053	7591	7745	6383	6505	7003	8062
WNT5A	10.79	9125	10.86	9787	8558	9175	9291	8791	10.03	9731	9819	7438	9936	10.88	8186	8532	9193	8204	7.83	10.48	7623	7871	8067	8634	7703	9334	7822	7454	10.58	9895	8672	9328	10.3	9.44	10.65	9815	7942	7459	9172	9011	7.53	10.73	9869	8282	9453	8603	7958	8202	9502
CSK	10.07	10.7	10.29	10.25	10.48	10.52	10.28	10.69	10.18	9956	9947	10.69	10.81	10.53	10.02	10.58	10.53	10.48	11.3	10.03	10.44	10.9	10.57	10.36	10.78	10.37	10.85	9.94	10.04	10.86	10.67	10.16	10.84	10.43	9.58	10.12	10.83	11.39	10.66	10.47	11.02	10.66	10.54	10.76	11.14	10.52	10.43	10.48	10.12
TNFSF9	4939	3024	4103	4.27	3677	4127	3622	4631	2273	5.24	4289	2.49	5.73	3841	3506	4.49	4443	8.9	2421	3627	1889	4239	4523	2592	2921	2901	2059	1.19	4248	2693	3.76	2947	4183	0.4772	3466	4.58	4.31	4919	3443	3951	3532	2141	1956	2901	3711	1749	2708	2798	4155
MAP3K8	8288	6442	9073	8592	6.85	7354	6861	6862	6887	9.12	7365	4651	5627	6597	7939	7738	7193	6707	5424	8282	5731	6737	6089	5646	5016	5594	5998	5569	7705	7454	7052	6715	6135	4683	7578	7.76	6422	5657	6.45	6993	5657	5267	4751	5669	6814	5.06	6262	7236	6726
[truncated: 1,145 more rows]
[truncated: 494 more columns]

## Sheet: Supplementary Table S7
							List of published direct target genes of miR-183 in PrCa
	Differential expression in Oliveira-Rizzo
GENE	D mimic	D inhib	L mimic	L inhib	TCGA corr	PAR-CLIP	First Author	DOI
Dkk3	y	y			-0.49519		Ueno	10.1038/bjc.2013.125
[truncated: 4 more rows]
